# Supplementary material for: Visible light-triggered selective C(sp2)-H/C(sp3)-H coupling of benzenes with aliphatic hydrocarbons
Source: Research Square preprint supplement (doi:10.21203/rs.3.rs-2831009/v1), 2023-05-05
Supplement: Supplementary file 1 [file 84a24bc03fb96b7c0a7d1984.pdf]

## Supporting Information

### **Visible light-triggered selective C(sp<sup>2</sup>)-H/C(sp<sup>3</sup>)-H coupling of benzenes with aliphatic hydrocarbons**

Qian-Yu Li<sup>1</sup>, Shiyan Cheng<sup>1</sup>, Ziqi Ye<sup>1</sup>, Tao Huang<sup>1</sup>, Fuxing Yang<sup>1</sup>, Yu-Mei Lin<sup>1</sup> & Lei Gong<sup>1,2\*</sup>

<sup>1</sup> Key Laboratory of Chemical Biology of Fujian Province, College of Chemistry and Chemical Engineering, Xiamen University, Xiamen, Fujian 361005, China.

<sup>2</sup> Innovation Laboratory for Sciences and Technologies of Energy Materials of Fujian Province (IKKEM), Xiamen 361005, China.

E-mail: gongl@xmu.edu.cn

## Contents

|                                                                                    |             |
|------------------------------------------------------------------------------------|-------------|
| <b>1. General Information</b>                                                      | <b>S3</b>   |
| <b>2. Synthesis of Substrates</b>                                                  | <b>S4</b>   |
| <b>3. Photochemical C(sp<sup>2</sup>)-H/C(sp<sup>3</sup>)-H Coupling Reactions</b> | <b>S12</b>  |
| 3.1 Optimization of Reaction Conditions                                            | S12         |
| 3.2 Substrate Scope                                                                | S12         |
| 3.3 A Scale-up Reaction                                                            | S70         |
| <b>4. Mechanistic Investigations</b>                                               | <b>S71</b>  |
| 4.1 Radical Probing Experiments                                                    | S71         |
| 4.1.1 Investigation of Benzyl Radical                                              | S71         |
| 4.1.2 Investigation of Chlorine Free Radical                                       | S72         |
| 4.2 Light-Off/on Experiments                                                       | S74         |
| 4.3 XPS Spectroscopy                                                               | S75         |
| 4.4 UV/Vis-Absorption Spectroscopy                                                 | S76         |
| 4.5 Reaction Interfered with Competitive Nucleophiles                              | S77         |
| 4.6 Kinetic Isotope Effect (KIE) Experiments                                       | S78         |
| 4.7 Probing Other Intermediates                                                    | S79         |
| <b>5. X-Ray Diffraction</b>                                                        | <b>S81</b>  |
| 5.1 Crystal Structure of Product <b>35</b>                                         | S81         |
| 5.2 Crystal Structure of Product <b>38</b>                                         | S81         |
| 5.3 Crystal Structure of Product <b>56</b>                                         | S83         |
| <b>6. Computational Studies</b>                                                    | <b>S86</b>  |
| 6.1 General Information                                                            | S86         |
| 6.2 Hirshfeld Charge Analysis                                                      | S86         |
| 6.3 Geometry Optimization                                                          | S89         |
| <b>7. <sup>1</sup>H and <sup>13</sup>C NMR Spectrum</b>                            | <b>S92</b>  |
| <b>8. References</b>                                                               | <b>S194</b> |

## 1. General Information

### General Remarks

Substrates **1zh–1zm**, **1zn**, **1zo**, **1zp** and **1zr–1zu**, **2z**, **2zl**, **82** were synthesized according to the published procedures.<sup>[1–6]</sup> FeCl<sub>3</sub>·6H<sub>2</sub>O was purchased from Sigma-Aldrich (purity ≥ 99.99%). All others reagents were purchased from commercial suppliers (TCI, Sigma-Aldrich, Alfa Aesar, Macklin, Energy Chemical, Laajoo, Leyan, Bide Pharmatech, Adamas-beta® and J&K Scientific) and used without further purification. Synthesis of the substrates were carried out under an argon atmosphere with magnetic stirring unless stated otherwise. Visible-light photochemical reactions were performed in 10 mL Schlenk tubes at the indicated temperature under an argon atmosphere and under irradiation with a 50 W LED lamp ( $\lambda_{\text{max}} = 395$  nm,  $\lambda_{\text{max}} = 410$  nm,  $\lambda_{\text{max}} = 425$  nm and  $\lambda_{\text{max}} = 455$  nm; commercial supplier: Hong Chang Lighting Co. Ltd., website: <http://hongchang-led.taobao.com>) or a 40 W Kessil LED lamp (PR160L,  $\lambda_{\text{max}} = 370$  nm; commercial supplier: Anhui Kemi Instrument Co. Ltd., website: <http://www.ahkemi.com>).

### Purification Techniques

Flash column chromatography was performed with silica gel (300–400 mesh, pH = 6.7–7.0). Thin layer chromatography (TLC) were carried out on Leyan HPTLC Silica Gel 60 GF254, visualized with UV light (254 nm).

### Analytical Techniques

<sup>1</sup>H NMR and <sup>13</sup>C NMR spectra were recorded on a Bruker AM (500 MHz) spectrometer at ambient temperature. NMR standards were used as follows: CDCl<sub>3</sub> = 7.26 ppm (<sup>1</sup>H NMR), 77.16 ppm (<sup>13</sup>C NMR). IR spectra were recorded on a Nicolet Avatar 330 FT-IR spectrophotometer. High-resolution mass spectra were recorded on an Agilent 1290-G6545XT QTOF instrument using ESI technique. Power X-ray diffraction data were recorded on a XtaLAB Synergy four-circle diffractometer with monochromatic Cu K $\alpha$  radiation ( $\lambda = 1.54184$  Å) at 100 K, 99.9 K and a Gemini S Ultra Synergy four-circle diffractometer with monochromatic Cu K $\alpha$  radiation ( $\lambda = 0.71073$  Å) at 293 K. Emission spectra were recorded on a Hitachi F-7000. X-ray photoelectron spectroscopy (XPS) measurements were carried out with a Qtac-100 LEISS-XPS spectrometer with a hemispherical electron energy analyzer and a home-made reaction chamber. Monochromatic Al K $\alpha$  X-ray source (1486.6 eV, anode operating at 300 W) was used as the excitation source. The energy analysis error of the measurement was  $\pm 0.2$  eV for both binding energy and Auger energy. The binding energies in all the spectra were calibrated according to C 1s peak at 284.6 eV.

## 2. Synthesis of Substrates

According to the published procedure,<sup>[1]</sup> compounds **1zh–1zm** were prepared according to general procedure A.

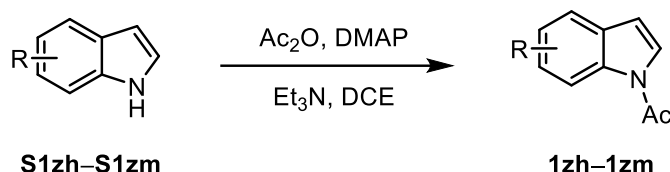

**General procedure A:** To a solution of indole derivative (**S1zh–S1zm**, 10.0 mmol) in 1,2-dichloroethane (DCE) (20 mL), acetic anhydride (40.0 mmol), Et<sub>3</sub>N (30.0 mmol) and 4-dimethylaminopyridine (DMAP) (3.8 mmol) were added, and the mixture was stirred at room temperature for 24 h. After completion of the reaction as monitored by TLC, the residue was washed with a saturated solution of NH<sub>4</sub>Cl (30 mL) and extracted with CH<sub>2</sub>Cl<sub>2</sub> (3 × 20 mL). The combined organic extracts were dried over Na<sub>2</sub>SO<sub>4</sub> and concentrated under vacuum. Purification using silica gel column chromatography (elution with petroleum ether (PE):ethyl acetate (EtOAc) = 9:1) afforded the pure product (**1zh–1zm**).

### 1-(1*H*-indol-1-yl)ethan-1-one (**1zh**)

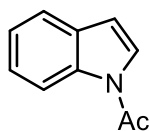

According to general procedure A, compound **1zh** was synthesized as a white solid (1.56 g, 9.80 mmol, 98% yield).

**<sup>1</sup>H NMR** (500 MHz, CDCl<sub>3</sub>) δ 8.13 – 8.09 (m, 1H), 8.01 – 7.98 (m, 1H), 7.88 – 7.83 (m, 1H), 7.38 – 7.34 (m, 1H), 6.95 – 6.88 (m, 1H), 6.57 – 6.54 (m, 1H), 2.65 (s, 3H).

**<sup>13</sup>C NMR** (126 MHz, CDCl<sub>3</sub>) δ 167.1, 135.8, 128.6, 127.4, 123.8, 122.7, 121.9, 116.5, 110.3, 24.5.

### 1-(4-fluoro-1*H*-indol-1-yl)ethan-1-one (**1zi**)

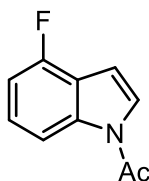

According to general procedure A, compound **1zi** was synthesized as a white solid (1.56 g, 8.80 mmol, 88% yield).

**<sup>1</sup>H NMR** (500 MHz, CDCl<sub>3</sub>) δ 7.91 – 7.86 (m, 1H), 7.71 – 7.65 (m, 1H), 7.06 – 6.99 (m, 1H), 6.98 – 6.96 (m, 1H), 6.59 – 6.54 (m, 1H), 2.65 (s, 3H).

**<sup>13</sup>C NMR** (126 MHz, CDCl<sub>3</sub>) δ 167.1, 156.5, 154.5, 136.8, 130.0, 124.5, 118.8, 111.8, 110.8, 24.5.

**1-(4-chloro-1H-indol-1-yl)ethan-1-one (1zj)**

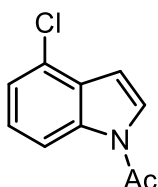

According to general procedure A, compound **1zj** was synthesized as a white solid (1.74 g, 8.98 mmol, 90% yield).

**<sup>1</sup>H NMR** (500 MHz, CDCl<sub>3</sub>) δ 8.04 – 7.95 (m, 1H), 7.86 – 7.77 (m, 1H), 7.00 (d, *J* = 10.0 Hz, 2H), 6.60 – 6.52 (m, 1H), 2.67 (s, 3H).

**<sup>13</sup>C NMR** (126 MHz, CDCl<sub>3</sub>) δ 167.2, 137.1, 130.1, 128.2, 126.8, 124.6, 121.6, 114.9, 112.3, 24.5.

**1-(4-bromo-1H-indol-1-yl)ethan-1-one (1zk)**

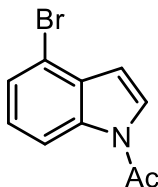

According to general procedure A, compound **1zk** was synthesized as a white solid (2.02 g, 8.48 mmol, 85% yield).

**<sup>1</sup>H NMR** (500 MHz, CDCl<sub>3</sub>) δ 8.07 – 8.02 (m, 1H), 7.85 – 7.80 (m, 1H), 7.32 – 7.25 (m, 1H), 6.97 – 6.90 (m, 1H), 6.59 – 6.52 (m, 1H), 2.65 (s, 3H).

**<sup>13</sup>C NMR** (126 MHz, CDCl<sub>3</sub>) δ 167.1, 138.8, 129.5, 128.5, 128.3, 123.2, 116.8, 115.6, 109.0, 24.5.

**1-(4-methyl-1H-indol-1-yl)ethan-1-one (1zl)**

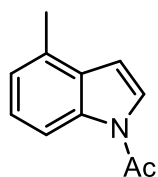

According to general procedure **A**, compound **1zl** was synthesized as a white solid (1.61 g, 9.29 mmol, 93% yield).

**<sup>1</sup>H NMR** (500 MHz, CDCl<sub>3</sub>) δ 8.02 – 7.98 (m, 1H), 7.78 – 7.76 (m, 1H), 7.02 – 6.98 (m, 1H), 6.96 – 6.92 (m, 1H), 6.57 – 6.54 (m, 1H), 2.65 (s, 3H), 2.58 (s, 3H).

**<sup>13</sup>C NMR** (126 MHz, CDCl<sub>3</sub>) δ 167.1, 136.3, 136.1, 125.2, 125.0, 122.5, 122.4, 113.7, 106.1, 24.5, 20.3.

#### 1-(5-bromo-1*H*-indol-1-yl)ethan-1-one (**1zm**)

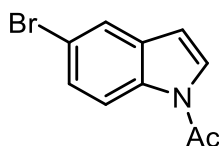

According to general procedure **A**, compound **1zm** was synthesized as a white solid (2.00 g, 8.47 mmol, 85% yield).

**<sup>1</sup>H NMR** (500 MHz, CDCl<sub>3</sub>) δ 7.88 (d, *J* = 15.5 Hz, 2H), 7.41 (d, *J* = 5.0 Hz, 2H), 6.58 – 6.54 (m, 1H), 2.65 (s, 3H).

**<sup>13</sup>C NMR** (126 MHz, CDCl<sub>3</sub>) δ 167.1, 137.4, 127.8, 127.3, 125.8, 124.7, 122.1, 119.0, 111.1, 24.5.

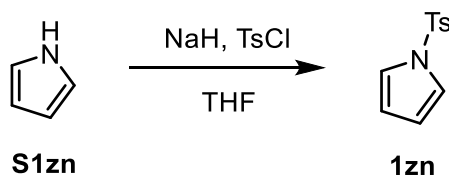

According to the published procedure,<sup>[2]</sup> compound **1zn** was synthesized. To a solution of pyrrole (**S1zn**, 10.0 mmol) in THF (15 mL), NaH (15.0 mmol) was added. The suspension was stirred for 30 min, then tosyl chloride (12.0 mmol) in THF (5.0 mL) was added. The mixture was stirred for additional 3 h, then quenched with water (30 mL), and extracted with EtOAc (3 × 20 mL). The combined organic layers were dried over Na<sub>2</sub>SO<sub>4</sub> and concentrated under reduced pressure. Purification using silica gel column chromatography (elution with PE:EtOAc = 2:1) afforded the pure product **1zn** as a white solid (1.81 g, 8.18 mmol, 82% yield).

#### 1-tosyl-1*H*-pyrrole (**1zn**)

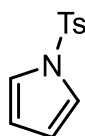

**<sup>1</sup>H NMR** (500 MHz, CDCl<sub>3</sub>) δ 7.78 – 7.72 (m, 2H), 7.62 – 7.54 (m, 2H), 7.47 – 7.41 (m, 2H), 6.28 – 6.22 (m, 2H), 2.43 (s, 3H).

**<sup>13</sup>C NMR** (126 MHz, CDCl<sub>3</sub>) δ 144.3, 136.9, 129.7, 127.2, 127.2, 101.7, 21.2.

According to the published procedure,<sup>[3]</sup> compounds **1zo**, **1zp** and **1zr–1zu** were prepared according to **general procedure B**.

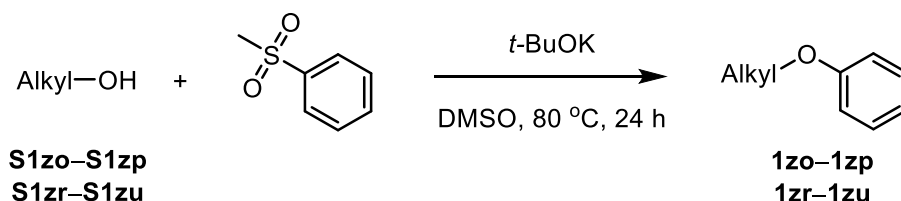

**General procedure B:** A Schlenk tube was added *t*-BuOK (4.0 mmol), (methylsulfonyl)benzene (2.0 mmol) under an argon atmosphere in a glove box. DMSO (2.0 mL) and alkyl alcohol (**S1zo–S1zp**, **S1zr–S1zu**, 4.0 mmol) were added *via* syringe under an argon atmosphere. The reaction mixture was heated to 80 °C in an oil bath and stirred for 24 h. Upon completion of the reaction, the sealed vial was cooled to room temperature. H<sub>2</sub>O (20 mL) was added to quench the reaction. The mixture was extracted with dichloromethane (DCM) (3 × 10 mL). The combined organic layers were dried over Na<sub>2</sub>SO<sub>4</sub> and concentrated under reduced pressure. Purification using silica gel column chromatography (elution with hexane) afforded the compounds (**1zo–1zp** and **1zr–1zu**).

## 2-(phenoxymethyl)tetrahydrofuran (**1zo**)

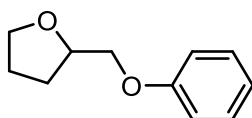

According to **general procedure B**, compound **1zo** was synthesized as a colorless oil (0.32 g, 1.80 mmol, 90% yield).

**<sup>1</sup>H NMR** (500 MHz, CDCl<sub>3</sub>) δ 7.53 – 7.22 (m, 2H), 6.97 – 6.88 (m, 3H), 4.35 – 4.21 (m, 1H), 4.15 – 3.94 (m, 2H), 3.91 – 3.74 (m, 2H), 2.05 – 1.86 (m, 1H), 1.75 – 1.60 (m, 3H).

**<sup>13</sup>C NMR** (126 MHz, CDCl<sub>3</sub>) δ 159.2, 129.8, 121.5, 115.8, 78.3, 70.3, 69.2, 30.3, 25.6.

**1-(phenoxyethyl)adamantane (1zp)**

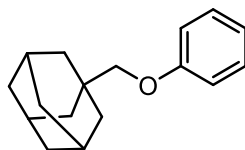

According to **general procedure B**, compound **1zp** was synthesized as a colorless oil (0.45 g, 1.86 mmol, 92% yield).

**<sup>1</sup>H NMR** (500 MHz, CDCl<sub>3</sub>) δ 7.51 – 7.23 (m, 2H), 6.97 – 6.88 (m, 3H), 3.66 (s, 2H), 2.04 – 1.95 (m, 3H), 1.74 (d, *J* = 33.0 Hz, 6H), 1.70 (t, 6H).

**<sup>13</sup>C NMR** (126 MHz, CDCl<sub>3</sub>) δ 159.1, 129.5, 121.9, 115.9, 80.3, 39.3, 37.4, 33.2, 29.6.

**((1*S*,2*R*,5*R*)-5-isopropyl-2-methylcyclohexyl)oxy)benzene (1zr)**

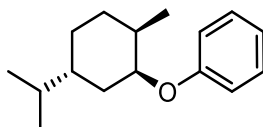

According to **general procedure B**, compound **1zr** was synthesized as a colorless oil (0.38 g, 1.64 mmol, 82% yield).

**<sup>1</sup>H NMR** (500 MHz, CDCl<sub>3</sub>) δ 7.28 – 7.23 (m, 2H), 6.92 – 6.85 (m, 3H), 4.05 – 3.99 (m, 1H), 2.26 – 2.14 (m, 2H), 1.73 – 1.70 (m, 2H), 1.53 – 1.44 (m, 2H), 1.14 – 0.99 (m, 2H), 0.93 – 0.89 (m, 7H), 0.77 (d, *J* = 7.0 Hz, 3H)

**<sup>13</sup>C NMR** (126 MHz, CDCl<sub>3</sub>) δ 158.4, 129.5, 120.4, 115.9, 48.1, 40.4, 34.6, 31.5, 26.1, 23.8, 22.2, 20.8, 16.6.

**(1*R*,2*R*,4*S*)-1,3,3-trimethyl-2-phenoxybicyclo[2.2.1]heptane (1zs)**

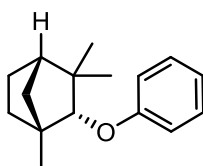

According to **general procedure B**, compound **1zs** was synthesized as a colorless oil (0.39 g, 1.69 mmol, 85% yield).

**<sup>1</sup>H NMR** (500 MHz, CDCl<sub>3</sub>) δ 7.26 – 7.21 (m, 2H), 6.91 – 6.86 (m, 3H), 3.86 (d, *J* = 1.5 Hz, 1H), 2.05 – 2.02 (m, 1H), 1.77 – 1.72 (m, 2H), 1.60 – 1.47 (m, 1H), 1.51 – 1.43 (m, 1H), 1.21 – 1.17 (m, 4H), 1.12 – 1.05 (m, 4H), 0.86 (s, 3H).

**<sup>13</sup>C NMR** (126 MHz, CDCl<sub>3</sub>) δ 160.3, 129.3, 120.1, 115.8, 90.0, 49.5, 49.1, 41.4, 40.0, 30.5,

26.4, 25.9, 20.4, 19.9.

**(1*R*,2*S*,4*R*)-1,3,7,7-tetramethyl-2-phenoxybicyclo[2.2.1]heptane (1zt)**

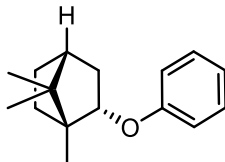

According to **general procedure B**, compound **1zt** was synthesized as a colorless oil (0.32 g, 1.39 mmol, 70% yield).

**<sup>1</sup>H NMR** (500 MHz, CDCl<sub>3</sub>) δ 7.31 (t, *J* = 8.0 Hz, 2H), 6.98 – 6.84 (m, 3H), 4.40 – 4.35 (m, 1H), 2.42 (td, *J* = 9.3, 4.6 Hz, 1H), 2.30 (dt, *J* = 7.6, 4.7 Hz, 1H), 1.85 – 1.78 (m, 2H), 1.43 – 1.37 (m, 1H), 1.33 – 1.29 (m, 1H), 1.18 (dd, *J* = 13.3, 3.3 Hz, 1H), 1.00 (s, 3H), 0.97 (d, *J* = 5.0 Hz, 6H).

**<sup>13</sup>C NMR** (126 MHz, CDCl<sub>3</sub>) δ 159.2, 129.4, 120.1, 115.5, 82.7, 49.5, 47.6, 45.2, 36.9, 28.0, 26.8, 19.8, 19.0, 13.8.

**(3*R*,5*R*,8*S*,9*R*,10*R*,13*R*,14*R*)-10,13-dimethyl-3-phenoxyhexadecahydro-17*H*-cyclopenta[*a*]phenanthren-17-one (1zu)**

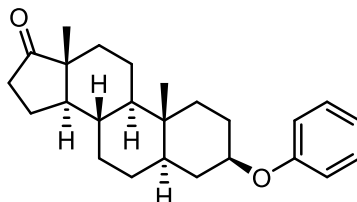

According to **general procedure B**, compound **1zu** was synthesized as a colorless oil (0.44 g, 1.20 mmol, 60% yield).

**<sup>1</sup>H NMR** (500 MHz, CDCl<sub>3</sub>) δ 7.28 – 7.24 (m, 2H), 7.01 – 6.86 (m, 3H), 3.66 – 3.52 (m, 1H), 2.37 – 2.12 (m, 2H), 1.94 – 1.77 (m, 4H), 1.72 – 1.46 (m, 6H), 1.45 – 1.26 (m, 5H), 1.23 – 1.13 (m, 2H), 1.11 – 0.99 (m, 2H), 0.86 (s, 3H), 0.82 (s, 3H), 0.80 – 0.68 (m, 1H).

**<sup>13</sup>C NMR** (126 MHz, CDCl<sub>3</sub>) δ 219.9, 157.5, 130.1, 121.7, 117.1, 78.2, 54.4, 52.1, 48.6, 44.7, 37.7, 36.3, 36.2, 36.0, 33.6, 33.0, 31.2, 28.3, 26.3, 22.1, 22.0, 14.6, 13.4.

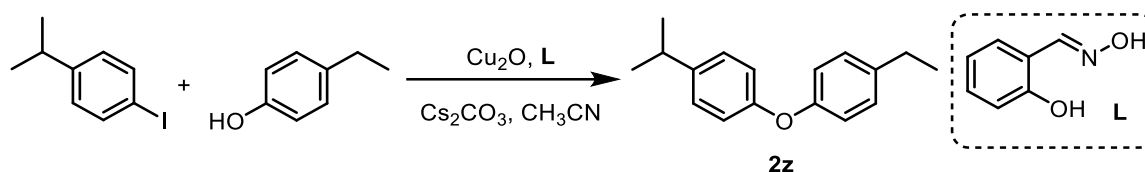

According to the published procedure,<sup>[4]</sup> compound **2z** was synthesized. To a solution of Cu<sub>2</sub>O (2.0 mmol) and ligand (2.0 mmol) in DMF (6.0 mL), 4-ethylphenol (10.0 mmol), 1-iodo-4-isopropylbenzene (15.0 mmol) and cesium carbonate (20.0 mmol) were added at 110 °C for 30 h. Purification using silica gel column chromatography (elution with hexane) afforded the compound **2z** as a colorless oil (1.56 g, 6.50 mmol, 65% yield).

#### 1-ethyl-4-(4-isopropylphenoxy)benzene (**2z**)

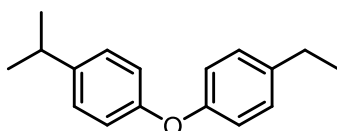

**<sup>1</sup>H NMR** (500 MHz, CDCl<sub>3</sub>) δ 7.58 – 7.33 (m, 5H), 7.32 – 7.30 (m, 1H), 7.17 – 7.11 (m, 2H), 2.95 – 2.80 (m, 1H), 2.72 (q, 2H), 1.21 (s, 3H), 1.19 (s, 3H), 1.18 (t, 3H).

**<sup>13</sup>C NMR** (126 MHz, CDCl<sub>3</sub>) δ 154.5, 153.6, 142.5, 139.6, 129.2, 128.5, 120.1, 119.4, 34.0, 27.8, 23.4, 13.2.

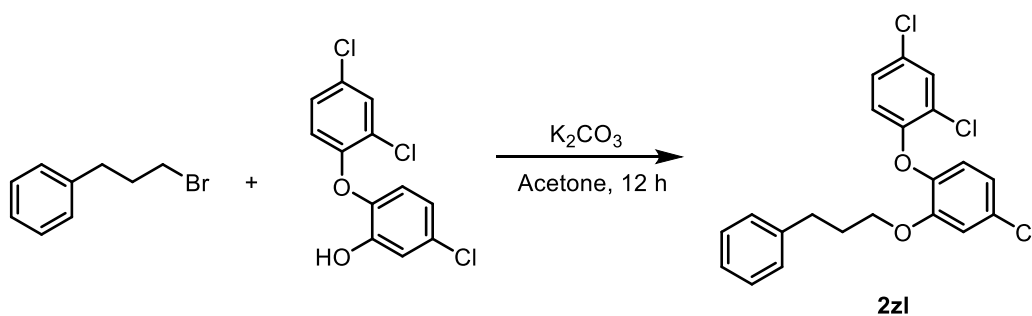

According to the published procedure,<sup>[5]</sup> compound **2zl** was synthesized. The mixture of triclosan (7.5 mmol), (3-bromopropyl)benzene (5.0 mmol) and K<sub>2</sub>CO<sub>3</sub> (10.0 mmol) in acetone (20 mL) was heated to reflux. Upon completion stirring for 12 h, the reaction mixture was cooled to room temperature and filtered. Purification using silica gel column chromatography (elution with PE:EtOAc = 10:1) afforded the compound **2zl** as a colorless oil (1.46 g, 3.60 mmol, 72% yield).

**2,4-dichloro-1-(4-chloro-2-(3-phenylpropoxy)phenoxy)benzene (2zl)**

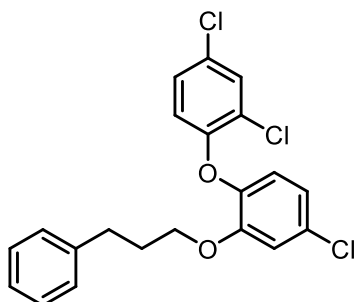

**<sup>1</sup>H NMR** (500 MHz, CDCl<sub>3</sub>) δ 7.43 (d, *J* = 2.5 Hz, 1H), 7.27 – 7.24 (m, 2H), 7.19 – 7.16 (m, 1H), 7.10 – 7.06 (m, 3H), 7.00 – 6.97 (m, 1H), 6.93 – 6.91 (m, 2H), 6.65 (d, *J* = 8.8 Hz, 1H), 3.89 (d, *J* = 6.1 Hz, 2H), 2.55 (dd, *J* = 8.4, 6.7 Hz, 2H), 1.95 – 1.91 (m, 2H).

**<sup>13</sup>C NMR** (126 MHz, CDCl<sub>3</sub>) δ 152.2, 148.6, 145.1, 142.0, 131.3, 130.5, 129.9, 128.5, 128.4, 128.4, 126.2, 124.2, 123.4, 120.5, 117.4, 116.1, 69.2, 32.7, 30.2.

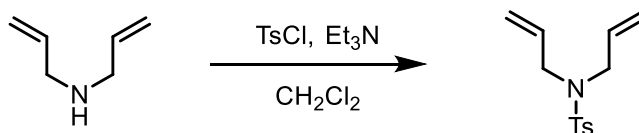

According to the published procedure, <sup>[6]</sup> compound **82** was synthesized. In a round-bottom flask on ice, triethylamine (12.0 mmol) was added dropwise to a solution of diallylamine (**S82**, 12.0 mmol) in DCM (20 mL). The reaction was stirred at 0 °C for 30 min and 4-toluenesulfonyl chloride (10.0 mmol) was added slowly to the reaction. The reaction was slowly warmed to room temperature and stirred overnight. The reaction was washed with water and brine. The organic layer was dried over sodium sulfate and concentrated under reduced pressure afforded the compound **82** as a colorless oil (2.05 g, 8.20 mmol, 68% yield).

***N,N*-diallyl-4-methylbenzenesulfonamide (82)**

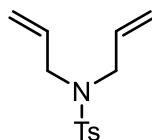

**<sup>1</sup>H NMR** (500 MHz, CDCl<sub>3</sub>) δ 7.70 (d, *J* = 8.3 Hz, 2H), 7.29 (d, *J* = 8.1 Hz, 2H), 5.64 – 5.56 (m, 2H), 5.15 (dd, *J* = 2.5, 1.2 Hz, 2H), 5.14 – 5.11 (m, 2H), 3.80 (d, *J* = 6.3 Hz, 4H), 2.42 (s, 3H).

**<sup>13</sup>C NMR** (126 MHz, CDCl<sub>3</sub>) δ 143.0, 137.3, 132.5, 129.5, 126.9, 118.7, 49.2, 21.2.

### 3. Photochemical C(sp<sup>2</sup>)-H/C(sp<sup>3</sup>)-H Coupling Reactions

#### 3.1 Optimization of Reaction Conditions

A Schlenk tube (10 mL) was charged with anisole (**1a**, 32.4 mg, 0.30 mmol), 4-ethylbiphenyl (**2a**, 164.0 mg, 0.90 mmol), FeCl<sub>3</sub>·6H<sub>2</sub>O (16.2 mg, 0.060 mmol) and (CHCl<sub>2</sub>)<sub>2</sub> (0.75 mL). The mixture was degassed *via* three freeze-pump-thaw cycles, then filled with dry air. The Schlenk tube was positioned approximately 5 cm away from a 50 W LED lamp ( $\lambda_{\text{max}}$  = 410 nm). After being stirred at 25 °C for 48 h, the reaction mixture was concentrated to dryness. Purification using silica gel column chromatography (elution with petroleum ether (PE): dichloromethane (DCM) = 5:1) gave the pure product.

**Supplementary Table 1.** Investigation of other conditions. <sup>a</sup>

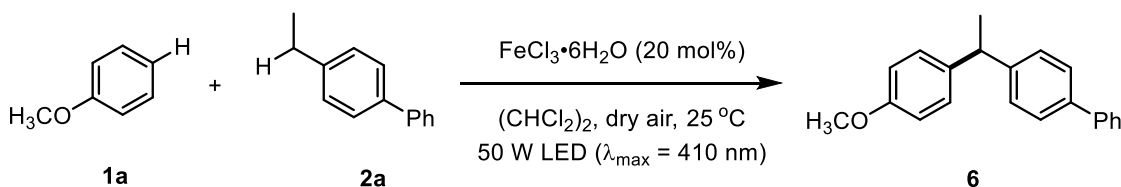

| Entry | Deviation from standard conditions                       | Yield(%) <sup>b</sup> |
|-------|----------------------------------------------------------|-----------------------|
| 1     | O <sub>2</sub> instead of dry air                        | 50                    |
| 2     | Ar instead of dry air                                    | 24                    |
| 3     | 0.40 mmol H <sub>2</sub> O as the additive               | 22                    |
| 4     | 0.40 mmol K <sub>2</sub> CO <sub>3</sub> as the additive | trace                 |
| 5     | 0.40 mmol 2,2'-bipyridine as the additive                | 0                     |

<sup>a</sup> Reaction conditions: **1a** (0.30 mmol), **2a** (0.90 mmol), metal salt (0.060 mmol), indicated additive (0.40 mmol), (CHCl<sub>2</sub>)<sub>2</sub> (0.75 mL), under dry air, irradiation with a 50 W LED lamp ( $\lambda_{\text{max}}$  = 410 nm), 25 °C, 48 h. <sup>b</sup> Isolated yield.

#### 3.2 Substrate Scope

##### 4-(1-(4-methoxyphenyl)ethyl)-1,1'-biphenyl (**3**)

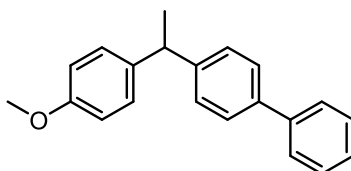

A Schlenk tube (10 mL) was charged with anisole (**1a**, 32.4 mg, 0.30 mmol), 4-ethylbiphenyl (**2a**, 164.0 mg, 0.90 mmol), FeCl<sub>3</sub>·6H<sub>2</sub>O (16.2 mg, 0.060 mmol) and (CHCl<sub>2</sub>)<sub>2</sub> (0.75 mL). The mixture was degassed *via* three freeze-pump-thaw cycles, then filled with dry air. The Schlenk

tube was positioned approximately 5 cm away from a 50 W LED lamp ( $\lambda_{\text{max}} = 410$  nm). After being stirred at 25 °C for 48 h, the reaction mixture was concentrated to dryness. Purification using silica gel column chromatography (elution with PE:DCM = 5:1) gave the pure product **3** as a white solid (65.7 mg, 0.228 mmol, 76% yield).

**<sup>1</sup>H NMR** (500 MHz, CDCl<sub>3</sub>)  $\delta$  7.63 – 7.61 (m, 2H), 7.56 (d,  $J = 8.3$  Hz, 2H), 7.46 (t,  $J = 7.6$  Hz, 2H), 7.39 – 7.36 (m, 1H), 7.33 (d,  $J = 8.1$  Hz, 2H), 7.23 (d,  $J = 8.4$  Hz, 2H), 6.92 – 6.89 (m, 2H), 4.20 (q,  $J = 7.2$  Hz, 1H), 3.82 (s, 3H), 1.70 (d,  $J = 7.3$  Hz, 3H).

**<sup>13</sup>C NMR** (126 MHz, CDCl<sub>3</sub>)  $\delta$  158.0, 146.0, 141.1, 139.0, 138.6, 128.8, 128.7, 128.1, 127.2, 127.2, 127.1, 113.9, 55.4, 43.8, 22.2.

**IR** (film):  $\nu$  (cm<sup>-1</sup>) 3500, 2964, 2813, 1867, 1661, 1536, 1407, 1251, 1078, 831, 621.

**HRMS** (ESI-TOF,  $m/z$ ) calculated for C<sub>21</sub>H<sub>21</sub>O<sup>+</sup> [M+H]<sup>+</sup> 289.1587, found 289.1600.

#### 4-(1-(4-ethoxyphenyl)ethyl)-1,1'-biphenyl (**4**)

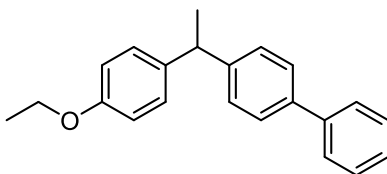

A Schlenk tube (10 mL) was charged with ethoxybenzene (**1b**, 36.6 mg, 0.30 mmol), 4-ethylbiphenyl (**2a**, 164.0 mg, 0.90 mmol), FeCl<sub>3</sub>·6H<sub>2</sub>O (16.2 mg, 0.060 mmol) and (CHCl<sub>2</sub>)<sub>2</sub> (0.75 mL). The mixture was degassed *via* three freeze-pump-thaw cycles, then filled with dry air. The Schlenk tube was positioned approximately 5 cm away from a 50 W LED lamp ( $\lambda_{\text{max}} = 410$  nm). After being stirred at 25 °C for 48 h, the reaction mixture was concentrated to dryness. Purification using silica gel column chromatography (elution with PE:DCM = 5:1) gave the pure product **4** as a colorless oil (67.1 mg, 0.207 mmol, 74% yield).

**<sup>1</sup>H NMR** (500 MHz, CDCl<sub>3</sub>)  $\delta$  7.62 – 7.60 (m, 2H), 7.57 – 7.54 (m, 2H), 7.46 (t,  $J = 7.7$  Hz, 2H), 7.38 – 7.35 (m, 1H), 7.33 (d,  $J = 8.2$  Hz, 2H), 7.21 (d,  $J = 8.6$  Hz, 2H), 6.90 – 6.87 (m, 2H), 4.19 (q,  $J = 7.2$  Hz, 1H), 4.05 (q,  $J = 7.0$  Hz, 2H), 1.69 (d,  $J = 7.2$  Hz, 3H), 1.44 (t,  $J = 7.0$  Hz, 3H).

**<sup>13</sup>C NMR** (126 MHz, CDCl<sub>3</sub>)  $\delta$  157.4, 146.1, 141.2, 139.0, 138.4, 128.8, 128.6, 128.1, 127.2, 127.1, 127.1, 114.5, 63.5, 43.8, 22.2, 15.0.

**IR** (film):  $\nu$  (cm<sup>-1</sup>) 3505, 2942, 2776, 2531, 1665, 1573, 1407, 1150, 1078, 895, 569.

**HRMS** (ESI-TOF,  $m/z$ ) calculated for C<sub>22</sub>H<sub>23</sub>O<sup>+</sup> [M+H]<sup>+</sup> 325.1563, found 325.1570.

#### 4-(1-(4-(benzyloxy)phenyl)ethyl)-1,1'-biphenyl (**5**)

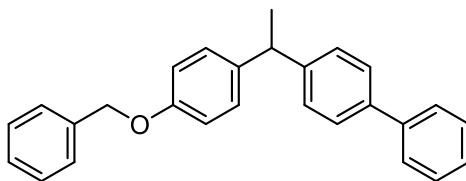

A Schlenk tube (10 mL) was charged with (benzyloxy)benzene (**1c**, 55.2 mg, 0.30 mmol), 4-ethylbiphenyl (**2a**, 164.0 mg, 0.90 mmol),  $\text{FeCl}_3 \cdot 6\text{H}_2\text{O}$  (16.2 mg, 0.060 mmol) and  $(\text{CHCl}_2)_2$  (0.75 mL). The mixture was degassed *via* three freeze-pump-thaw cycles, then filled with dry air. The Schlenk tube was positioned approximately 5 cm away from a 50 W LED lamp ( $\lambda_{\text{max}} = 410$  nm). After being stirred at 25 °C for 48 h, the reaction mixture was concentrated to dryness. Purification using silica gel column chromatography (elution with PE:DCM = 5:1) gave the pure product **5** as a colorless oil (60.1 mg, 0.165 mmol, 55% yield).

**$^1\text{H}$  NMR** (500 MHz,  $\text{CDCl}_3$ )  $\delta$  7.59 (d,  $J = 7.6$  Hz, 2H), 7.53 (d,  $J = 8.1$  Hz, 2H), 7.42 (m, 6H), 7.32 (m, 4H), 7.20 (d,  $J = 8.6$  Hz, 2H), 6.95 (d,  $J = 8.6$  Hz, 2H), 5.06 (s, 2H), 4.17 (q,  $J = 7.2$  Hz, 1H), 1.67 (d,  $J = 7.2$  Hz, 3H).

**$^{13}\text{C}$  NMR** (126 MHz,  $\text{CDCl}_3$ )  $\delta$  157.3, 146.0, 141.2, 139.0, 138.9, 137.3, 128.8, 128.7, 128.7, 128.1, 128.1, 127.6, 127.2, 127.2, 127.2, 114.9, 70.2, 43.8, 22.2.

**IR** (film):  $\nu$  ( $\text{cm}^{-1}$ ) 3500, 3337, 2927, 1705, 1669, 1506, 1363, 1053, 825, 706, 672.

**HRMS** (ESI-TOF,  $m/z$ ) calculated for  $\text{C}_{27}\text{H}_{25}\text{O}^+$   $[\text{M}+\text{H}]^+$  365.1900, found 365.1907.

#### 4-(1-(4-phenoxyphenyl)ethyl)-1,1'-biphenyl (**6**)

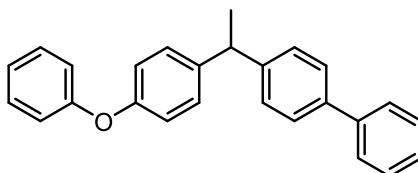

A Schlenk tube (10 mL) was charged with diphenyl ether (**1d**, 51.1 mg, 0.30 mmol), 4-ethylbiphenyl (**2a**, 164.0 mg, 0.90 mmol),  $\text{FeCl}_3 \cdot 6\text{H}_2\text{O}$  (16.2 mg, 0.060 mmol) and  $(\text{CHCl}_2)_2$  (0.75 mL). The mixture was degassed *via* three freeze-pump-thaw cycles, then filled with dry air. The Schlenk tube was positioned approximately 5 cm away from a 50 W LED lamp ( $\lambda_{\text{max}} = 410$  nm). After being stirred at 25 °C for 48 h, the reaction mixture was concentrated to dryness. Purification using silica gel column chromatography (elution with PE:DCM = 5:1) gave the pure product **6** as a white solid (78.8 mg, 0.225 mmol, 75% yield).

**$^1\text{H}$  NMR** (500 MHz,  $\text{CDCl}_3$ )  $\delta$  7.60 – 7.58 (m, 2H), 7.54 (d,  $J = 8.2$  Hz, 2H), 7.44 (t,  $J = 7.7$  Hz, 2H), 7.36 – 7.30 (m, 5H), 7.23 (d,  $J = 8.6$  Hz, 2H), 7.09 (t,  $J = 7.4$  Hz, 1H), 7.04 – 6.95 (m, 4H), 4.20 (q,  $J = 7.2$  Hz, 1H), 1.69 (d,  $J = 7.2$  Hz, 3H).

**<sup>13</sup>C NMR** (126 MHz, CDCl<sub>3</sub>) δ 157.6, 155.5, 145.7, 141.3, 141.1, 139.1, 129.8, 129.0, 128.9, 128.1, 127.3, 127.2, 127.2, 123.2, 119.0, 118.9, 44.0, 22.2.

**IR** (film): ν (cm<sup>-1</sup>) 3488, 3407, 2844, 1705, 1683, 1546, 1363, 1235, 1053, 825, 672.

**HRMS** (ESI-TOF, m/z) calculated for C<sub>26</sub>H<sub>23</sub>O<sup>+</sup> [M+H]<sup>+</sup> 351.1743, found 351.1749.

#### 4-(1-(3-bromo-4-methoxyphenyl)ethyl)-1,1'-biphenyl (7)

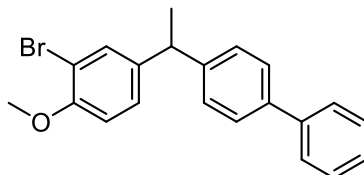

A Schlenk tube (10 mL) was charged with 2-bromoanisole (**1e**, 56.1 mg, 0.30 mmol), 4-ethylbiphenyl (**2a**, 164.0 mg, 0.90 mmol), FeCl<sub>3</sub>·6H<sub>2</sub>O (16.2 mg, 0.060 mmol) and (CHCl<sub>2</sub>)<sub>2</sub> (0.75 mL). The mixture was degassed *via* three freeze-pump-thaw cycles, then filled with dry air. The Schlenk tube was positioned approximately 5 cm away from a 50 W LED lamp (λ<sub>max</sub> = 410 nm). After being stirred at 25 °C for 48 h, the reaction mixture was concentrated to dryness. Purification using silica gel column chromatography (elution with PE:DCM = 5:1) gave the pure product **7** as a white solid (74.7 mg, 0.204 mmol, 68% yield).

**<sup>1</sup>H NMR** (500 MHz, CDCl<sub>3</sub>) δ 7.60 – 7.57 (m, 2H), 7.55 – 7.52 (m, 2H), 7.46 (d, *J* = 2.2 Hz, 1H), 7.44 (t, *J* = 7.7 Hz, 2H), 7.34 (t, *J* = 7.4 Hz, 1H), 7.28 (d, *J* = 8.2 Hz, 2H), 7.16 (m, 1H), 6.85 (d, *J* = 8.5 Hz, 1H), 4.13 (q, *J* = 7.2 Hz, 1H), 3.88 (s, 3H), 1.65 (d, *J* = 7.2 Hz, 3H).

**<sup>13</sup>C NMR** (126 MHz, CDCl<sub>3</sub>) δ 154.3, 145.2, 141.0, 140.2, 139.3, 132.5, 128.9, 128.0, 127.7, 127.3, 127.2, 127.1, 112.0, 111.7, 56.4, 43.5, 22.1.

**IR** (film): ν (cm<sup>-1</sup>) 3500, 3337, 3147, 2927, 1681, 1669, 1506, 1363, 1323, 1053, 825, 706, 672, 493.

**HRMS** (ESI-TOF, m/z) calculated for C<sub>21</sub>H<sub>19</sub>BrNaO<sup>+</sup> [M+Na]<sup>+</sup> 389.0511, found 389.0517.

#### 4-(1-(2-bromo-4-methoxyphenyl)ethyl)-1,1'-biphenyl (8)

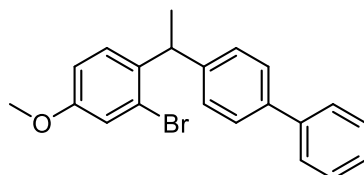

A Schlenk tube (10 mL) was charged with 3-bromoanisole (**1f**, 56.1 mg, 0.30 mmol), 4-ethylbiphenyl (**2a**, 164.0 mg, 0.90 mmol), FeCl<sub>3</sub>·6H<sub>2</sub>O (16.2 mg, 0.060 mmol) and (CHCl<sub>2</sub>)<sub>2</sub> (0.75 mL). The mixture was degassed *via* three freeze-pump-thaw cycles, then filled with dry air. The Schlenk tube was positioned approximately 5 cm away from a 50 W LED lamp (λ<sub>max</sub>

= 410 nm). After being stirred at 25 °C for 48 h, the reaction mixture was concentrated to dryness. Purification using silica gel column chromatography (elution with PE:DCM = 5:1) gave the pure product **8** as a colorless oil (68.1 mg, 0.186 mmol, 62% yield).

**<sup>1</sup>H NMR** (500 MHz, CDCl<sub>3</sub>) δ 7.65 – 7.62 (m, 2H), 7.58 (d, *J* = 8.2 Hz, 2H), 7.47 (t, *J* = 7.7 Hz, 2H), 7.37 (m, 3H), 7.22 – 7.19 (m, 2H), 6.89 (m, 1H), 4.68 (q, *J* = 7.2 Hz, 1H), 3.81 (s, 3H), 1.68 (d, *J* = 7.2 Hz, 3H).

**<sup>13</sup>C NMR** (126 MHz, CDCl<sub>3</sub>) δ 158.4, 144.6, 141.1, 139.0, 137.4, 129.2, 128.8, 128.2, 127.2, 127.1, 127.1, 124.9, 118.0, 114.0, 55.6, 42.5, 21.6.

**IR** (film):  $\nu$  (cm<sup>-1</sup>) 3500, 3337, 3147, 2927, 1681, 1669, 1506, 1480, 1323, 1053, 988, 735, 672, 467.

**HRMS** (ESI-TOF, *m/z*) calculated for C<sub>21</sub>H<sub>19</sub>BrNaO<sup>+</sup> [*M*+Na]<sup>+</sup> 389.0511, found 389.0521.

#### 4-(1-(3,4-dimethoxyphenyl)ethyl)-1'-biphenyl (**9**)

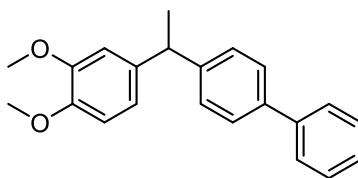

A Schlenk tube (10 mL) was charged with 1,2-dimethoxybenzene (**1g**, 41.4 mg, 0.30 mmol), 4-ethylbiphenyl (**2a**, 164.0 mg, 0.90 mmol), FeCl<sub>3</sub>·6H<sub>2</sub>O (16.2 mg, 0.060 mmol) and (CHCl<sub>2</sub>)<sub>2</sub> (0.75 mL). The mixture was degassed *via* three freeze-pump-thaw cycles, then filled with dry air. The Schlenk tube was positioned approximately 5 cm away from a 50 W LED lamp ( $\lambda_{\text{max}}$  = 410 nm). After being stirred at 25 °C for 48 h, the reaction mixture was concentrated to dryness. Purification using silica gel column chromatography (elution with PE:DCM = 3:1) gave the pure product **9** as a white solid (66.8 mg, 0.210 mmol, 70% yield).

**<sup>1</sup>H NMR** (500 MHz, CDCl<sub>3</sub>) δ 7.60 – 7.57 (m, 2H), 7.53 (d, *J* = 8.2 Hz, 2H), 7.43 (t, *J* = 7.7 Hz, 2H), 7.34 (d, *J* = 7.2 Hz, 1H), 7.30 (d, *J* = 8.2 Hz, 2H), 6.82 (d, *J* = 11.5 Hz, 2H), 6.78 (d, *J* = 5.0 Hz, 1H), 4.16 (q, *J* = 7.2 Hz, 1H), 3.87 (s, 3H), 3.85 (s, 3H), 1.68 (d, *J* = 7.2 Hz, 3H).

**<sup>13</sup>C NMR** (126 MHz, CDCl<sub>3</sub>) δ 149.0, 147.5, 145.9, 141.1, 139.0, 139.0, 128.8, 128.0, 127.2, 127.2, 127.1, 119.5, 111.4, 111.2, 56.0, 56.0, 44.2, 22.2.

**IR** (film):  $\nu$  (cm<sup>-1</sup>) 3507, 2972, 2013, 1867, 1661, 1431, 1407, 1326, 1251, 1078, 831, 621, 597, 550.

**HRMS** (ESI-TOF, *m/z*) calculated for C<sub>22</sub>H<sub>23</sub>O<sub>2</sub><sup>+</sup> [*M*+H]<sup>+</sup> 319.1693, found 319.1685.

#### 4-(1-(3,4,5-trimethoxyphenyl)ethyl)-1,1'-biphenyl (**10**)

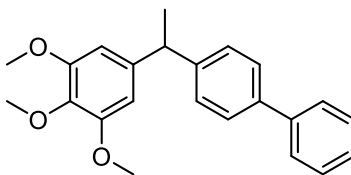

A Schlenk tube (10 mL) was charged with 1,2,3-trimethoxybenzene (**1h**, 50.5 mg, 0.30 mmol), 4-ethylbiphenyl (**2a**, 164.0 mg, 0.90 mmol),  $\text{FeCl}_3 \cdot 6\text{H}_2\text{O}$  (16.2 mg, 0.060 mmol) and  $(\text{CHCl}_2)_2$  (0.75 mL). The mixture was degassed *via* three freeze-pump-thaw cycles, then filled with dry air. The Schlenk tube was positioned approximately 5 cm away from a 50 W LED lamp ( $\lambda_{\text{max}} = 410 \text{ nm}$ ). After being stirred at 25 °C for 48 h, the reaction mixture was concentrated to dryness. Purification using silica gel column chromatography (elution with PE:DCM = 2:1) gave the pure product **10** as a white solid (70.0 mg, 0.201 mmol, 67% yield).

**$^1\text{H}$  NMR** (500 MHz,  $\text{CDCl}_3$ )  $\delta$  7.59 (d,  $J = 7.8 \text{ Hz}$ , 2H), 7.54 – 7.51 (m, 2H), 7.45 – 7.41 (m, 2H), 7.33 (t,  $J = 8.1 \text{ Hz}$ , 3H), 6.95 (d,  $J = 8.6 \text{ Hz}$ , 1H), 6.68 (d,  $J = 8.6 \text{ Hz}$ , 1H), 4.52 (q,  $J = 7.1 \text{ Hz}$ , 1H), 3.89 (s, 3H), 3.86 (s, 3H), 3.70 (s, 3H), 1.63 (d,  $J = 7.3 \text{ Hz}$ , 3H).

**$^{13}\text{C}$  NMR** (126 MHz,  $\text{CDCl}_3$ )  $\delta$  152.2, 151.7, 146.2, 142.4, 141.2, 138.7, 132.5, 128.8, 128.1, 127.1, 127.1, 127.0, 122.0, 107.2, 60.9, 60.8, 56.1, 37.7, 21.8.

**IR** (film):  $\nu$  ( $\text{cm}^{-1}$ ) 3507, 2972, 1867, 1608, 1431, 1396, 1326, 1314, 1251, 1078, 831, 666, 585, 542.

**HRMS** (ESI-TOF,  $m/z$ ) calculated for  $\text{C}_{23}\text{H}_{25}\text{O}_3^+$   $[\text{M}+\text{H}]^+$  349.1798, found 349.1803.

#### 1-(1-([1,1'-biphenyl]-4-yl)ethyl)-4-methoxynaphthalene (**11**)

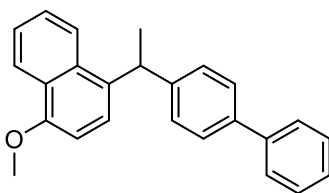

A Schlenk tube (10 mL) was charged with 1-methoxynaphthalene (**1i**, 47.5 mg, 0.30 mmol), 4-ethylbiphenyl (**2a**, 164.0 mg, 0.90 mmol),  $\text{FeCl}_3 \cdot 6\text{H}_2\text{O}$  (16.2 mg, 0.060 mmol) and  $(\text{CHCl}_2)_2$  (0.75 mL). The mixture was degassed *via* three freeze-pump-thaw cycles, then filled with dry air. The Schlenk tube was positioned approximately 5 cm away from a 50 W LED lamp ( $\lambda_{\text{max}} = 410 \text{ nm}$ ). After being stirred at 25 °C for 48 h, the reaction mixture was concentrated to dryness. Purification using silica gel column chromatography (elution with PE:DCM = 4:1) gave the pure product **11** as a white solid (55.8 mg, 0.165 mmol, 55% yield).

**$^1\text{H}$  NMR** (500 MHz,  $\text{CDCl}_3$ )  $\delta$  7.59 (d,  $J = 8.9 \text{ Hz}$ , 1H), 7.54 (d,  $J = 7.6 \text{ Hz}$ , 2H), 7.46 – 7.44 (m, 2H), 7.40 (d,  $J = 8.2 \text{ Hz}$ , 2H), 7.29 (t,  $J = 7.6 \text{ Hz}$ , 2H), 7.20 (d,  $J = 8.1 \text{ Hz}$ , 4H), 7.03 (m, 1H), 6.98 (d,  $J = 2.2 \text{ Hz}$ , 1H), 4.20 (q,  $J = 7.1 \text{ Hz}$ , 1H), 3.76 (s, 3H), 1.63 (d,  $J = 7.2 \text{ Hz}$ , 3H).

**<sup>13</sup>C NMR** (126 MHz, CDCl<sub>3</sub>) δ 157.5, 145.7, 141.5, 141.1, 139.1, 133.3, 129.3, 129.1, 128.8, 128.3, 127.4, 127.2, 127.2, 127.1, 127.0, 125.4, 118.8, 105.8, 55.4, 44.5, 22.0.

**IR** (film): ν (cm<sup>-1</sup>) 3507, 3096, 1955, 1587, 1431, 1390, 1274, 1251, 1003, 845, 618, 497, 472.

**HRMS** (ESI-TOF, m/z) calculated for C<sub>25</sub>H<sub>23</sub>O<sup>+</sup> [M+H]<sup>+</sup> 339.1743, found 339.1744.

**5-(1-([1,1'-biphenyl]-4-yl)ethyl)-2,3-dihydrobenzofuran (12)**

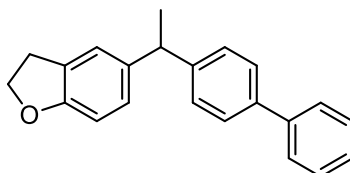

A Schlenk tube (10 mL) was charged with 2,3-dihydrobenzofuran (**1j**, 36.0 mg, 0.30 mmol), 4-ethylbiphenyl (**2a**, 164.0 mg, 0.90 mmol), FeCl<sub>3</sub>·6H<sub>2</sub>O (16.2 mg, 0.060 mmol) and (CHCl<sub>2</sub>)<sub>2</sub> (0.75 mL). The mixture was degassed *via* three freeze-pump-thaw cycles, then filled with dry air. The Schlenk tube was positioned approximately 5 cm away from a 50 W LED lamp (λ<sub>max</sub> = 410 nm). After being stirred at 25 °C for 48 h, the reaction mixture was concentrated to dryness. Purification using silica gel column chromatography (elution with PE:DCM = 5:1) gave the pure product **12** as a colorless oil (51.3 mg, 0.171 mmol, 57% yield).

**<sup>1</sup>H NMR** (500 MHz, CDCl<sub>3</sub>) δ 7.60 (m, 2H), 7.56 – 7.54 (m, 2H), 7.45 (t, *J* = 7.7 Hz, 2H), 7.36 – 7.32 (m, 3H), 7.10 (s, 1H), 7.06 – 7.04 (m, 1H), 6.76 (d, *J* = 8.2 Hz, 1H), 4.56 (t, *J* = 8.7 Hz, 2H), 4.17 (q, *J* = 7.2 Hz, 1H), 3.19 (t, *J* = 8.7 Hz, 2H), 1.68 (d, *J* = 7.2 Hz, 3H).

**<sup>13</sup>C NMR** (126 MHz, CDCl<sub>3</sub>) δ 158.5, 146.2, 141.1, 138.9, 138.6, 128.8, 128.0, 127.2, 127.2, 127.1, 124.2, 109.1, 71.3, 44.0, 30.0, 29.8, 22.3.

**IR** (film): ν (cm<sup>-1</sup>) 3067, 3012, 2779, 1856, 1751, 1478, 1407, 1266, 1251, 1038, 851, 550.

**HRMS** (ESI-TOF, m/z) calculated for C<sub>22</sub>H<sub>20</sub>NaO<sup>+</sup> [M+Na]<sup>+</sup> 323.1406, found 323.1412.

**5-(1-([1,1'-biphenyl]-4-yl)ethyl)benzo[d][1,3]dioxole (13)**

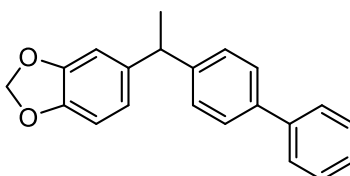

A Schlenk tube (10 mL) was charged with 1,3-benzodioxole (**1k**, 36.6 mg, 0.30 mmol), 4-ethylbiphenyl (**2a**, 164.0 mg, 0.90 mmol), FeCl<sub>3</sub>·6H<sub>2</sub>O (16.2 mg, 0.060 mmol) and (CHCl<sub>2</sub>)<sub>2</sub> (0.75 mL). The mixture was degassed *via* three freeze-pump-thaw cycles, then filled with dry air. The Schlenk tube was positioned approximately 5 cm away from a 50 W LED lamp (λ<sub>max</sub> = 410 nm). After being stirred at 25 °C for 48 h, the reaction mixture was concentrated to

dryness. Purification using silica gel column chromatography (elution with PE:DCM = 5:1) gave the pure product **13** as a white solid (62.5 mg, 0.207 mmol, 69% yield).

**<sup>1</sup>H NMR** (500 MHz, CDCl<sub>3</sub>) δ 7.59 (d, *J* = 7.6 Hz, 2H), 7.54 (d, *J* = 8.1 Hz, 2H), 7.44 (t, *J* = 7.6 Hz, 2H), 7.35 (d, *J* = 7.5 Hz, 1H), 7.31 (d, *J* = 8.2 Hz, 2H), 6.78 – 6.74 (m, 3H), 5.93 (s, 2H), 4.14 (q, *J* = 7.2 Hz, 1H), 1.66 (d, *J* = 7.2 Hz, 3H).

**<sup>13</sup>C NMR** (126 MHz, CDCl<sub>3</sub>) δ 147.8, 145.9, 145.7, 141.1, 140.5, 139.1, 128.8, 128.0, 127.3, 127.2, 127.2, 120.5, 108.3, 108.2, 101.0, 44.3, 22.2.

**IR** (film): ν (cm<sup>-1</sup>) 3601, 3061, 3033, 2770, 1751, 1447, 1407, 1266, 1251, 1091, 851, 737, 550.

**HRMS** (ESI-TOF, *m/z*) calculated for C<sub>21</sub>H<sub>19</sub>O<sub>2</sub><sup>+</sup> [M+H]<sup>+</sup> 303.1380, found 303.1383.

#### 6-(1-([1,1'-biphenyl]-4-yl)ethyl)-2,3-dihydrobenzo[*b*][1,4]dioxine (**14**)

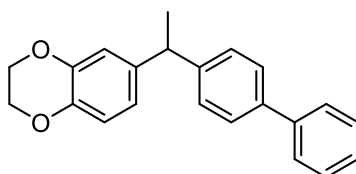

A Schlenk tube (10 mL) was charged with 1,4-benzodioxan (**11**, 58.1 mg, 0.30 mmol), 4-ethylbiphenyl (**2a**, 164.0 mg, 0.90 mmol), FeCl<sub>3</sub>·6H<sub>2</sub>O (16.2 mg, 0.060 mmol) and (CHCl<sub>2</sub>)<sub>2</sub> (0.75 mL). The mixture was degassed *via* three freeze-pump-thaw cycles, then filled with dry air. The Schlenk tube was positioned approximately 5 cm away from a 50 W LED lamp (λ<sub>max</sub> = 410 nm). After being stirred at 25 °C for 48 h, the reaction mixture was concentrated to dryness. Purification using silica gel column chromatography (elution with PE:DCM = 5:1) gave the pure product **14** as a colorless oil (65.4 mg, 0.207 mmol, 69% yield).

**<sup>1</sup>H NMR** (500 MHz, CDCl<sub>3</sub>) δ 7.57 (d, *J* = 7.3 Hz, 2H), 7.52 (d, *J* = 8.2 Hz, 2H), 7.42 (t, *J* = 7.6 Hz, 2H), 7.31 (dd, *J* = 18.2, 7.7 Hz, 3H), 6.77 (m, 3H), 4.24 (s, 4H), 4.10 (q, *J* = 7.2 Hz, 1H), 1.64 (d, *J* = 7.2 Hz, 3H).

**<sup>13</sup>C NMR** (126 MHz, CDCl<sub>3</sub>) δ 145.8, 143.4, 142.0, 141.2, 139.9, 139.1, 128.8, 128.0, 127.3, 127.2, 120.7, 117.2, 116.4, 64.6, 64.5, 44.0, 22.1.

**IR** (film): ν (cm<sup>-1</sup>) 3450, 3057, 2995, 2762, 1798, 1502, 1478, 1427, 1212, 1176, 1008, 715, 535.

**HRMS** (ESI-TOF, *m/z*) calculated for C<sub>22</sub>H<sub>21</sub>O<sub>2</sub><sup>+</sup> [M+H]<sup>+</sup> 317.1536, found 317.1543.

**(4-(1-([1,1'-biphenyl]-4-yl)ethyl)phenyl)(methyl)sulfane (15)**

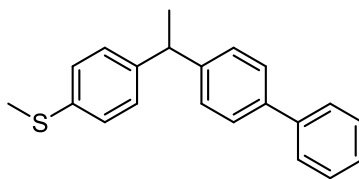

A Schlenk tube (10 mL) was charged with thioanisole (**1m**, 37.3 mg, 0.30 mmol), 4-ethylbiphenyl (**2a**, 164.0 mg, 0.90 mmol),  $\text{FeCl}_3 \cdot 6\text{H}_2\text{O}$  (16.2 mg, 0.060 mmol) and DCE (0.75 mL). The mixture was degassed *via* three freeze-pump-thaw cycles, then filled with dry air. The Schlenk tube was positioned approximately 5 cm away from a 50 W LED lamp ( $\lambda_{\text{max}} = 410 \text{ nm}$ ). After being stirred at 25 °C for 48 h, the reaction mixture was concentrated to dryness. Purification using silica gel column chromatography (elution with PE:DCM = 3:1) gave the pure product **15** as a colorless oil (48.4 mg, 0.159 mmol, 53% yield).

**$^1\text{H}$  NMR** (500 MHz,  $\text{CDCl}_3$ )  $\delta$  7.57 – 7.53 (m, 2H), 7.51 – 7.48 (m, 2H), 7.42 – 7.38 (m, 2H), 7.32 – 7.28 (m, 1H), 7.26 (d,  $J = 8.1 \text{ Hz}$ , 2H), 7.21 – 7.16 (m, 4H), 4.14 (q,  $J = 7.2 \text{ Hz}$ , 1H), 2.43 (s, 3H), 1.64 (d,  $J = 7.2 \text{ Hz}$ , 3H).

**$^{13}\text{C}$  NMR** (126 MHz,  $\text{CDCl}_3$ )  $\delta$  145.5, 143.5, 141.1, 139.1, 135.9, 128.8, 128.3, 128.1, 127.3, 127.2, 127.1, 127.1, 44.1, 21.9, 16.3.

**IR** (film):  $\nu$  ( $\text{cm}^{-1}$ ) 3510, 3076, 3062, 2985, 1791, 1302, 1272, 1095, 1025, 691, 478, 435.

**HRMS** (ESI-TOF,  $m/z$ ) calculated for  $\text{C}_{21}\text{H}_{21}\text{S}^+$   $[\text{M}+\text{H}]^+$  305.1358, found 305.1355.

**(4-(1-([1,1'-biphenyl]-4-yl)ethyl)phenyl)(phenyl)sulfane (16)**

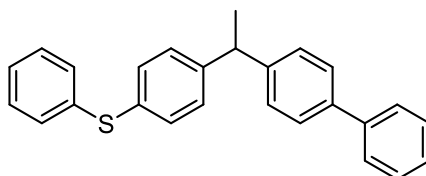

A Schlenk tube (10 mL) was charged with diphenylsulfane (**1n**, 55.8 mg, 0.30 mmol), 4-ethylbiphenyl (**2a**, 164.0 mg, 0.90 mmol),  $\text{FeCl}_3 \cdot 6\text{H}_2\text{O}$  (16.2 mg, 0.060 mmol) and DCE (0.75 mL). The mixture was degassed *via* three freeze-pump-thaw cycles, then filled with dry air. The Schlenk tube was positioned approximately 5 cm away from a 50 W LED lamp ( $\lambda_{\text{max}} = 410 \text{ nm}$ ). After being stirred at 25 °C for 48 h, the reaction mixture was concentrated to dryness. Purification using silica gel column chromatography (elution with PE:DCM = 5:1) gave the pure product **16** as a white solid (54.9 mg, 0.150 mmol, 50% yield).

**$^1\text{H}$  NMR** (500 MHz,  $\text{CDCl}_3$ )  $\delta$  7.57 – 7.54 (m, 2H), 7.51 (d,  $J = 8.2 \text{ Hz}$ , 2H), 7.40 (t,  $J = 7.7 \text{ Hz}$ , 2H), 7.36 – 7.23 (m, 9H), 7.22 – 7.18 (m, 3H), 4.16 (q,  $J = 7.2 \text{ Hz}$ , 1H), 1.65 (d,  $J = 7.2 \text{ Hz}$ , 3H).

**<sup>13</sup>C NMR** (126 MHz, CDCl<sub>3</sub>) δ 145.7, 145.2, 141.0, 139.3, 136.3, 132.9, 131.6, 130.8, 129.3, 128.9, 128.7, 128.1, 127.3, 127.2, 127.1, 126.9, 44.3, 21.9.

**IR** (film): ν (cm<sup>-1</sup>) 3503, 3019, 3004, 2856, 1723, 1685, 1483, 1075, 1027, 694, 478, 431.

**HRMS** (ESI-TOF, m/z) calculated for C<sub>26</sub>H<sub>23</sub>S<sup>+</sup> [M+H]<sup>+</sup> 367.1515, found 367.1506.

**(4-(1-([1,1'-biphenyl]-4-yl)ethyl)phenyl)(cyclopropyl)sulfane (17)**

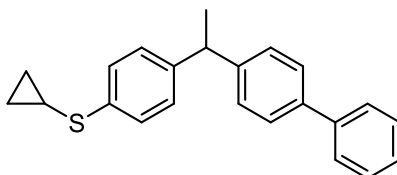

A Schlenk tube (10 mL) was charged with cyclopropyl(phenyl)sulfane (**1o**, 45.0 mg, 0.30 mmol), 4-ethylbiphenyl (**2a**, 164.0 mg, 0.90 mmol), FeCl<sub>3</sub>·6H<sub>2</sub>O (16.2 mg, 0.060 mmol) and DCE (0.75 mL). The mixture was degassed *via* three freeze-pump-thaw cycles, then filled with dry air. The Schlenk tube was positioned approximately 5 cm away from a 50 W LED lamp (λ<sub>max</sub> = 410 nm). After being stirred at 25 °C for 48 h, the reaction mixture was concentrated to dryness. Purification using silica gel column chromatography (elution with PE:DCM = 5:1) gave the pure product **17** as a colorless oil (49.5 mg, 0.150 mmol, 50% yield).

**<sup>1</sup>H NMR** (500 MHz, CDCl<sub>3</sub>) δ 7.63 – 7.60 (m, 2H), 7.56 (d, *J* = 8.2 Hz, 2H), 7.46 (t, *J* = 7.7 Hz, 2H), 7.38 – 7.32 (m, 5H), 7.23 (d, *J* = 8.3 Hz, 2H), 4.20 (q, *J* = 7.2 Hz, 1H), 2.21 (tt, *J* = 7.4, 4.4 Hz, 1H), 1.71 (d, *J* = 7.2 Hz, 3H), 1.09 – 1.05 (m, 2H), 0.74 – 0.71 (m, 2H).

**<sup>13</sup>C NMR** (126 MHz, CDCl<sub>3</sub>) δ 145.5, 143.4, 141.1, 139.1, 136.2, 128.8, 128.2, 128.1, 127.2, 127.2, 127.1, 126.9, 44.1, 22.0, 12.4, 8.6.

**IR** (film): ν (cm<sup>-1</sup>) 3492, 3053, 3012, 2766, 1723, 1685, 1480, 1095, 1074, 691, 476, 467.

**HRMS** (ESI-TOF, m/z) calculated for C<sub>23</sub>H<sub>23</sub>S<sup>+</sup> [M+H]<sup>+</sup> 331.1515, found 331.1510.

**4-(1-([1,1'-biphenyl]-4-yl)ethyl)phenol (18)**

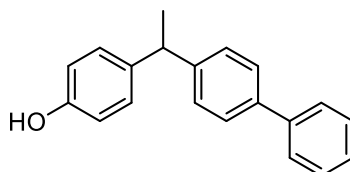

A Schlenk tube (10 mL) was charged with phenol (**1p**, 28.2 mg, 0.30 mmol), 4-ethylbiphenyl (**2a**, 164.0 mg, 0.90 mmol), FeCl<sub>3</sub>·6H<sub>2</sub>O (16.2 mg, 0.060 mmol) and CHCl<sub>3</sub> (0.75 mL). The mixture was degassed *via* three freeze-pump-thaw cycles, then filled with dry air. The Schlenk tube was positioned approximately 5 cm away from a 50 W LED lamp (λ<sub>max</sub> = 410 nm). After being stirred at 25 °C for 48 h, the reaction mixture was concentrated to dryness. Purification

using silica gel column chromatography (elution with PE:DCM = 2:1) gave the pure product **18** as a colorless oil (45.2 mg, 0.164 mmol, 55% yield).

**<sup>1</sup>H NMR** (500 MHz, CDCl<sub>3</sub>) δ 7.60 (d, *J* = 7.4 Hz, 2H), 7.55 (d, *J* = 8.2 Hz, 2H), 7.45 (t, *J* = 7.7 Hz, 2H), 7.35 (t, *J* = 7.4 Hz, 1H), 7.31 (d, *J* = 8.2 Hz, 2H), 7.15 (d, *J* = 8.5 Hz, 2H), 6.79 (d, *J* = 8.5 Hz, 2H), 5.00 (br, s, 1H), 4.17 (q, *J* = 7.2 Hz, 1H), 1.67 (d, *J* = 7.2 Hz, 3H).

**<sup>13</sup>C NMR** (126 MHz, CDCl<sub>3</sub>) δ 153.9, 146.0, 141.1, 139.0, 138.7, 128.9, 128.8, 128.0, 127.2, 127.2, 127.1, 115.4, 43.8, 22.2.

**IR** (film): ν (cm<sup>-1</sup>) 3226, 3219, 3204, 2956, 1723, 1632, 1473, 1295, 1237, 1118, 832, 694, 535, 478.

**HRMS** (ESI-TOF, *m/z*) calculated for C<sub>20</sub>H<sub>18</sub>NaO<sup>+</sup> [*M*+Na]<sup>+</sup> 297.1250, found 297.1257.

### 5-(1-([1,1'-biphenyl]-4-yl)ethyl)-[1,1'-biphenyl]-2-ol (**19**)

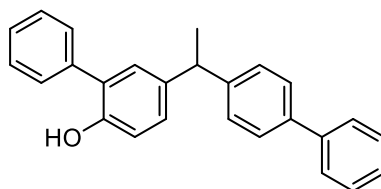

A Schlenk tube (10 mL) was charged with [1,1'-biphenyl]-2-ol (**1q**, 51.0 mg, 0.30 mmol), 4-ethylbiphenyl (**2a**, 164.0 mg, 0.90 mmol), FeCl<sub>3</sub>·6H<sub>2</sub>O (16.2 mg, 0.060 mmol) and CHCl<sub>3</sub> (0.75 mL). The mixture was degassed *via* three freeze-pump-thaw cycles, then filled with dry air. The Schlenk tube was positioned approximately 5 cm away from a 50 W LED lamp (λ<sub>max</sub> = 410 nm). After being stirred at 25 °C for 48 h, the reaction mixture was concentrated to dryness. Purification using silica gel column chromatography (elution with PE:DCM = 2:1) gave the pure product **19** as a white solid (47.3 mg, 0.135 mmol, 45% yield).

**<sup>1</sup>H NMR** (500 MHz, CDCl<sub>3</sub>) δ 7.54 (d, *J* = 7.3 Hz, 2H), 7.49 (d, *J* = 8.2 Hz, 2H), 7.44 – 7.41 (m, 4H), 7.37 (t, *J* = 7.7 Hz, 2H), 7.35 – 7.31 (m, 1H), 7.28 (d, *J* = 8.1 Hz, 3H), 7.11 (d, *J* = 8.6 Hz, 2H), 6.88 (d, *J* = 8.1 Hz, 1H), 5.14 (br, s, 1H), 4.14 (d, *J* = 7.2 Hz, 1H), 1.64 (d, *J* = 7.2 Hz, 3H).

**<sup>13</sup>C NMR** (126 MHz, CDCl<sub>3</sub>) δ 150.8, 145.9, 141.1, 139.0, 138.8, 137.4, 129.4, 129.3, 129.2, 128.8, 128.4, 128.0, 127.9, 127.2, 127.2, 127.1, 115.9, 43.9, 22.2.

**IR** (film): ν (cm<sup>-1</sup>) 3230, 3215, 3042, 2926, 1632, 1500, 1473, 1335, 1238, 881, 832, 691, 599, 551.

**HRMS** (ESI-TOF, *m/z*) calculated for C<sub>26</sub>H<sub>22</sub>NaO<sup>+</sup> [*M*+Na]<sup>+</sup> 373.1563, found 373.1555.

#### 4-(1-([1,1'-biphenyl]-4-yl)ethyl)-2-isopropylphenol (**20**)

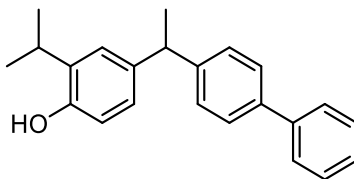

A Schlenk tube (10 mL) was charged with 2-isopropylphenol (**1r**, 40.9 mg, 0.30 mmol), 4-ethylbiphenyl (**2a**, 164.0 mg, 0.90 mmol),  $\text{FeCl}_3 \cdot 6\text{H}_2\text{O}$  (16.2 mg, 0.060 mmol) and  $\text{CHCl}_3$  (0.75 mL). The mixture was degassed *via* three freeze-pump-thaw cycles, then filled with dry air. The Schlenk tube was positioned approximately 5 cm away from a 50 W LED lamp ( $\lambda_{\text{max}} = 410$  nm). After being stirred at 25 °C for 48 h, the reaction mixture was concentrated to dryness. Purification using silica gel column chromatography (elution with PE:DCM = 1:1) gave the pure product **20** as a white solid (58.8 mg, 0.186 mmol, 62% yield).

**$^1\text{H}$  NMR** (500 MHz,  $\text{CDCl}_3$ )  $\delta$  7.60 (d,  $J = 7.4$  Hz, 2H), 7.54 (d,  $J = 8.1$  Hz, 2H), 7.44 (t,  $J = 7.7$  Hz, 2H), 7.33 (m, 3H), 7.13 (d,  $J = 2.3$  Hz, 1H), 6.95 (m, 1H), 6.70 (d,  $J = 8.2$  Hz, 1H), 4.74 (br, s, 1H), 4.18 – 4.14 (m, 1H), 3.21 (p,  $J = 6.9$  Hz, 1H), 1.67 (d,  $J = 7.2$  Hz, 3H), 1.28 (m, 6H).

**$^{13}\text{C}$  NMR** (126 MHz,  $\text{CDCl}_3$ )  $\delta$  151.2, 146.2, 141.2, 138.9, 138.7, 134.3, 128.8, 128.0, 127.2, 127.1, 125.9, 125.7, 115.3, 44.1, 27.4, 22.7, 22.4.

**IR** (film):  $\nu$  ( $\text{cm}^{-1}$ ) 3575, 3026, 2964, 2856, 1632, 1592, 1505, 1473, 1365, 1237, 1108, 793, 802, 674, 585, 528.

**HRMS** (ESI-TOF,  $m/z$ ) calculated for  $\text{C}_{23}\text{H}_{24}\text{NaO}^+$   $[\text{M}+\text{Na}]^+$  339.1719, found 339.1724.

#### 4-(1-([1,1'-biphenyl]-4-yl)ethyl)-2,6-dimethylphenol (**21**)

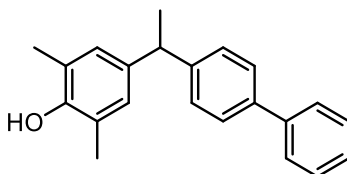

A Schlenk tube (10 mL) was charged with 2,6-dimethylphenol (**1s**, 36.6 mg, 0.30 mmol), 4-ethylbiphenyl (**2a**, 164.0 mg, 0.90 mmol),  $\text{FeCl}_3 \cdot 6\text{H}_2\text{O}$  (16.2 mg, 0.060 mmol) and  $\text{CHCl}_3$  (0.75 mL). The mixture was degassed *via* three freeze-pump-thaw cycles, then filled with dry air. The Schlenk tube was positioned approximately 5 cm away from a 50 W LED lamp ( $\lambda_{\text{max}} = 410$  nm). After being stirred at 25 °C for 48 h, the reaction mixture was concentrated to dryness. Purification using silica gel column chromatography (elution with PE:DCM = 1:1) gave the pure product **21** as a white solid (65.3 mg, 0.216 mmol, 72% yield).

**$^1\text{H}$  NMR** (500 MHz,  $\text{CDCl}_3$ )  $\delta$  7.58 (dd,  $J = 8.2, 1.1$  Hz, 2H), 7.53 – 7.50 (m, 2H), 7.42 (t,  $J = 7.7$  Hz, 2H), 7.31 (dd,  $J = 16.7, 7.8$  Hz, 3H), 6.88 (s, 2H), 4.50 (br, s, 1H), 4.07 (q,  $J = 7.2$  Hz,

1H), 2.23 (s, 6H), 1.63 (d,  $J = 7.2$  Hz, 3H).

$^{13}\text{C}$  NMR (126 MHz,  $\text{CDCl}_3$ )  $\delta$  150.6, 146.2, 141.2, 138.9, 138.1, 128.8, 128.0, 127.8, 127.2, 127.1, 123.0, 43.9, 22.2, 16.2.

IR (film):  $\nu$  ( $\text{cm}^{-1}$ ) 3506, 3056, 2938, 2856, 1606, 1585, 1443, 1365, 1237, 1082, 789, 670, 58, 525.

HRMS (ESI-TOF,  $m/z$ ) calculated for  $\text{C}_{22}\text{H}_{22}\text{NaO}^+$   $[\text{M}+\text{Na}]^+$  325.1563, found 325.1572.

#### 4-(1-([1,1'-biphenyl]-4-yl)ethyl)naphthalen-1-ol (**22**)

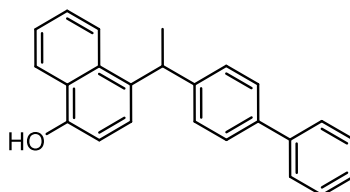

A Schlenk tube (10 mL) was charged with naphthalen-1-ol (**1t**, 43.3 mg, 0.30 mmol), 4-ethylbiphenyl (**2a**, 164.0 mg, 0.90 mmol),  $\text{FeCl}_3 \cdot 6\text{H}_2\text{O}$  (16.2 mg, 0.060 mmol) and  $\text{CHCl}_3$  (0.75 mL). The mixture was degassed *via* three freeze-pump-thaw cycles, then filled with dry air. The Schlenk tube was positioned approximately 5 cm away from a 50 W LED lamp ( $\lambda_{\text{max}} = 410$  nm). After being stirred at 25 °C for 48 h, the reaction mixture was concentrated to dryness. Purification using silica gel column chromatography (elution with PE:DCM = 2:1) gave the pure product **22** as a white solid (41.9 mg, 0.129 mmol, 43% yield).

$^1\text{H}$  NMR (500 MHz,  $\text{CDCl}_3$ )  $\delta$  8.12 – 8.10 (m, 1H), 7.83 – 7.81 (m, 1H), 7.57 (t,  $J = 8.6$  Hz, 5H), 7.51 (s, 1H), 7.46 (d,  $J = 3.6$  Hz, 2H), 7.43 (d,  $J = 7.6$  Hz, 2H), 7.39 (d,  $J = 8.0$  Hz, 2H), 7.35 (t,  $J = 7.4$  Hz, 1H), 5.20 (br s, 1H), 4.55 (q,  $J = 7.2$  Hz, 1H), 1.79 (d,  $J = 7.2$  Hz, 3H).

$^{13}\text{C}$  NMR (126 MHz,  $\text{CDCl}_3$ )  $\delta$  148.5, 144.0, 140.8, 139.9, 133.6, 129.0, 128.1, 127.8, 127.7, 127.4, 127.2, 126.0, 125.9, 125.5, 125.2, 125.1, 121.3, 120.7, 39.1, 21.2.

IR (film):  $\nu$  ( $\text{cm}^{-1}$ ) 3607, 3056, 1906, 1517, 1461, 1408, 1314, 1298, 1169, 1082, 1040, 958, 852, 712, 577, 520, 472.

HRMS (ESI-TOF,  $m/z$ ) calculated for  $\text{C}_{24}\text{H}_{21}\text{O}^+$   $[\text{M}+\text{H}]^+$  325.1587, found 325.1580.

#### 4-(1-([1,1'-biphenyl]-4-yl)ethyl)-2-bromobenzene-1,3-diol (**23**)

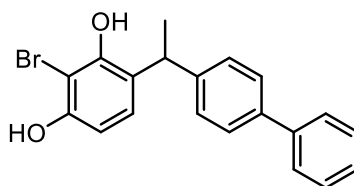

A Schlenk tube (10 mL) was charged with 2-bromoresorcinol (**1u**, 56.7 mg, 0.30 mmol), 4-ethylbiphenyl (**2a**, 164.0 mg, 0.90 mmol),  $\text{FeCl}_3 \cdot 6\text{H}_2\text{O}$  (16.2 mg, 0.060 mmol) and  $\text{CHCl}_3$  (0.75

mL). The mixture was degassed *via* three freeze-pump-thaw cycles, then filled with dry air. The Schlenk tube was positioned approximately 5 cm away from a 50 W LED lamp ( $\lambda_{\text{max}} = 410$  nm). After being stirred at 25 °C for 48 h, the reaction mixture was concentrated to dryness. Purification using silica gel column chromatography (elution with PE:DCM = 1:1) gave the pure product **23** as a white solid (60.9 mg, 0.165 mmol, 55% yield).

**<sup>1</sup>H NMR** (500 MHz, CDCl<sub>3</sub>)  $\delta$  7.59 – 7.57 (m, 2H), 7.53 (d,  $J = 8.2$  Hz, 2H), 7.43 (t,  $J = 7.7$  Hz, 2H), 7.33 (t,  $J = 7.7$  Hz, 3H), 7.11 (d,  $J = 8.5$  Hz, 1H), 6.63 (d,  $J = 8.5$  Hz, 1H), 5.47 (br, s, 1H), 5.35 (br, s, 1H), 4.49 (q,  $J = 7.2$  Hz, 1H), 1.64 (d,  $J = 7.3$  Hz, 3H).

**<sup>13</sup>C NMR** (126 MHz, CDCl<sub>3</sub>)  $\delta$  151.1, 150.1, 144.8, 141.0, 139.1, 128.7, 127.9, 127.4, 127.2, 127.1, 127.1, 125.5, 107.7, 100.0, 38.2, 21.0.

**IR** (film):  $\nu$  (cm<sup>-1</sup>) 3500, 3074, 2639, 2488, 1909, 1777, 1352, 1248, 1184, 1166, 1042, 933, 847, 839, 555, 541, 488.

**HRMS** (ESI-TOF,  $m/z$ ) calculated for C<sub>20</sub>H<sub>18</sub>BrO<sub>2</sub><sup>+</sup> [M+H]<sup>+</sup> 369.0485, found 369.0493.

#### 5-(1-([1,1'-biphenyl]-4-yl)ethyl)-2-methoxy-4-methylphenol (**24**)

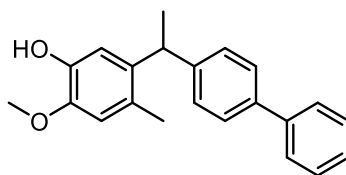

A Schlenk tube (10 mL) was charged with 2-methoxy-4-methylphenol (**1v**, 41.45 mg, 0.30 mmol), 4-ethylbiphenyl (**2a**, 164.0 mg, 0.90 mmol), FeCl<sub>3</sub>·6H<sub>2</sub>O (16.2 mg, 0.060 mmol) and CHCl<sub>3</sub> (0.75 mL). The mixture was degassed *via* three freeze-pump-thaw cycles, then filled with dry air. The Schlenk tube was positioned approximately 5 cm away from a 50 W LED lamp ( $\lambda_{\text{max}} = 410$  nm). After being stirred at 25 °C for 48 h, the reaction mixture was concentrated to dryness. Purification using silica gel column chromatography (elution with PE:DCM = 1:1) gave the pure product **24** as a white solid (64.9 mg, 0.204 mmol, 68% yield).

**<sup>1</sup>H NMR** (500 MHz, CDCl<sub>3</sub>)  $\delta$  7.60 (d,  $J = 7.4$  Hz, 2H), 7.52 (d,  $J = 8.2$  Hz, 2H), 7.45 (t,  $J = 7.6$  Hz, 2H), 7.35 (t,  $J = 7.4$  Hz, 1H), 7.27 (d,  $J = 8.1$  Hz, 2H), 6.96 (s, 1H), 6.69 (s, 1H), 5.51 (br, s, 1H), 4.30 (q,  $J = 7.1$  Hz, 1H), 3.88 (s, 3H), 2.25 (s, 3H), 1.64 (d,  $J = 7.2$  Hz, 3H).

**<sup>13</sup>C NMR** (126 MHz, CDCl<sub>3</sub>)  $\delta$  145.7, 144.6, 143.7, 141.2, 138.8, 136.9, 128.8, 128.1, 127.4, 127.2, 127.1, 113.5, 113.1, 56.1, 40.4, 22.3, 19.4.

**IR** (film):  $\nu$  (cm<sup>-1</sup>) 3662, 3490, 2961, 2939, 2843, 1514, 1466, 1367, 1272, 1123, 1040, 845, 681, 557.

**HRMS** (ESI-TOF,  $m/z$ ) calculated for C<sub>22</sub>H<sub>23</sub>O<sub>2</sub><sup>+</sup> [M+H]<sup>+</sup> 319.1693, found 319.1688.

#### 5-(1-([1,1'-biphenyl]-4-yl)ethyl)-2-methoxyphenol (**25**)

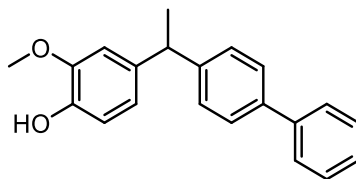

A Schlenk tube (10 mL) was charged with 2-methoxyphenol (**1w**, 37.2 mg, 0.30 mmol), 4-ethylbiphenyl (**2a**, 164.0 mg, 0.90 mmol),  $\text{FeCl}_3 \cdot 6\text{H}_2\text{O}$  (16.2 mg, 0.060 mmol) and  $\text{CHCl}_3$  (0.75 mL). The mixture was degassed *via* three freeze-pump-thaw cycles, then filled with dry air. The Schlenk tube was positioned approximately 5 cm away from a 50 W LED lamp ( $\lambda_{\text{max}} = 410 \text{ nm}$ ). After being stirred at 25 °C for 48 h, the reaction mixture was concentrated to dryness. Purification using silica gel column chromatography (elution with PE:DCM = 1:1) gave the pure product **25** as a white solid (63.9 mg, 0.210 mmol, 70% yield).

**$^1\text{H}$  NMR** (500 MHz,  $\text{CDCl}_3$ )  $\delta$  7.60 – 7.57 (m, 2H), 7.53 (d,  $J = 8.2 \text{ Hz}$ , 2H), 7.43 (t,  $J = 7.7 \text{ Hz}$ , 2H), 7.34 (d,  $J = 7.3 \text{ Hz}$ , 1H), 7.30 (d,  $J = 8.1 \text{ Hz}$ , 2H), 6.88 (d,  $J = 8.1 \text{ Hz}$ , 1H), 6.80 (dd,  $J = 8.1, 1.6 \text{ Hz}$ , 1H), 6.74 (d,  $J = 1.7 \text{ Hz}$ , 1H), 5.51 (br, s, 1H), 4.14 (q,  $J = 7.2 \text{ Hz}$ , 1H), 3.85 (s, 3H), 1.67 (d,  $J = 7.2 \text{ Hz}$ , 3H).

**$^{13}\text{C}$  NMR** (126 MHz,  $\text{CDCl}_3$ )  $\delta$  146.6, 146.0, 144.1, 141.1, 139.0, 138.4, 128.9, 128.0, 127.2, 127.2, 120.1, 114.3, 110.5, 56.0, 44.3, 22.3.

**IR** (film):  $\nu$  ( $\text{cm}^{-1}$ ) 3490, 2853, 1514, 1407, 1273, 1129, 1035, 838, 651, 595.

**HRMS** (ESI-TOF,  $m/z$ ) calculated for  $\text{C}_{21}\text{H}_{21}\text{O}_2^+$   $[\text{M}+\text{H}]^+$  305.1536, found 305.1544.

#### 4-(1-(4-methoxy-2-methylphenyl)ethyl)-1,1'-biphenyl (**26**)

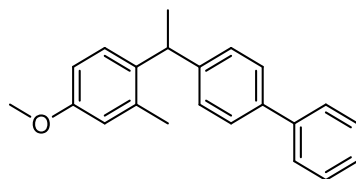

A Schlenk tube (10 mL) was charged with 1-methoxy-3-methylbenzene (**1x**, 36.7 mg, 0.30 mmol), 4-ethylbiphenyl (**2a**, 164.0 mg, 0.90 mmol),  $\text{FeCl}_3 \cdot 6\text{H}_2\text{O}$  (16.2 mg, 0.060 mmol) and  $(\text{CHCl}_2)_2$  (0.75 mL). The mixture was degassed *via* three freeze-pump-thaw cycles, then filled with dry air. The Schlenk tube was positioned approximately 5 cm away from a 50 W LED lamp ( $\lambda_{\text{max}} = 410 \text{ nm}$ ). After being stirred at 25 °C for 48 h, the reaction mixture was concentrated to dryness. Purification using silica gel column chromatography (elution with PE:DCM = 5:1) gave the pure product **26** as a white solid (59.8 mg, 0.198 mmol, 66% yield).

**$^1\text{H}$  NMR** (500 MHz,  $\text{CDCl}_3$ )  $\delta$  7.59 – 7.56 (m, 2H), 7.51 – 7.49 (m, 2H), 7.43 (d,  $J = 5.6 \text{ Hz}$ , 2H), 7.33 (s, 1H), 7.23 (dd,  $J = 8.4, 2.6 \text{ Hz}$ , 3H), 6.78 (dd,  $J = 8.5, 2.7 \text{ Hz}$ , 1H), 6.74 (d,  $J = 2.7 \text{ Hz}$ , 1H), 4.31 (d,  $J = 7.2 \text{ Hz}$ , 1H), 3.80 (s, 3H), 2.26 (s, 3H), 1.64 (d,  $J = 7.2 \text{ Hz}$ , 3H).

**<sup>13</sup>C NMR** (126 MHz, CDCl<sub>3</sub>) δ 157.9, 145.9, 141.2, 138.8, 137.6, 136.3, 128.8, 128.1, 127.8, 127.3, 127.1, 127.1, 116.3, 111.1, 55.3, 40.2, 22.5, 20.2.

**IR** (film): ν (cm<sup>-1</sup>) 3473, 3452, 3031, 2953, 2858, 1513, 1465, 1435, 1298, 1176, 1125, 1110, 817, 646, 595.

**HRMS** (ESI-TOF, m/z) calculated for C<sub>22</sub>H<sub>22</sub>NaO<sup>+</sup> [M+Na]<sup>+</sup> 325.1563, found 325.1556.

### triphenylmethane (**27**)

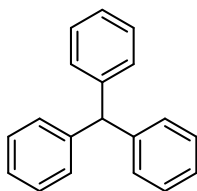

A Schlenk tube (10 mL) was charged with benzene (**1y**, 69.6 mg, 0.30 mmol), diphenylmethane (**2n**, 164.8 mg, 0.90 mmol), FeBr<sub>3</sub> (17.7 mg, 0.11 mmol) and DCE (0.75 mL). The mixture was degassed *via* three freeze-pump-thaw cycles, then filled with dry air. The Schlenk tube was positioned approximately 5 cm away from a 50 W LED lamp (λ<sub>max</sub> = 410 nm). After being stirred at 25 °C for 48 h, the reaction mixture was concentrated to dryness. Purification using silica gel column chromatography (elution with PE) gave the pure product **27** as a yellow oil (34.2 mg, 0.140 mmol, 45% yield).

**<sup>1</sup>H NMR** (500 MHz, CDCl<sub>3</sub>) δ 7.30 (t, *J* = 7.5 Hz, 6H), 7.23 (t, *J* = 7.3 Hz, 3H), 7.14 (d, *J* = 7.5 Hz, 6H), 5.57 (s, 1H).

**<sup>13</sup>C NMR** (126 MHz, CDCl<sub>3</sub>) δ 144.0, 129.6, 128.4, 126.4, 57.0.

**IR** (film): ν (cm<sup>-1</sup>) 3103, 3082, 3066, 3000, 1899, 1594, 1493, 1446, 1078, 1032, 1004, 977, 920, 857, 700, 620, 494, 466.

**HRMS** (ESI-TOF, m/z) calculated for C<sub>19</sub>H<sub>17</sub><sup>+</sup> [M+H]<sup>+</sup> 245.1325, found 245.1327.

### 1-bromo-4-(1-(*p*-tolyl)ethyl)benzene (**28**)

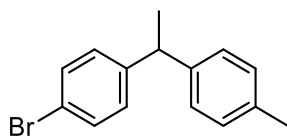

A Schlenk tube (10 mL) was charged with toluene (**1z**, 27.6 mg, 0.30 mmol), 4-bromoethylbenzene (**2f**, 164.8 mg, 0.90 mmol), FeBr<sub>3</sub> (17.7 mg, 0.11 mmol) and DCE (0.75 mL). The mixture was degassed *via* three freeze-pump-thaw cycles, then filled with dry air. The Schlenk tube was positioned approximately 5 cm away from a 50 W LED lamp (λ<sub>max</sub> = 410 nm). After being stirred at 25 °C for 48 h, the reaction mixture was concentrated to dryness. Purification using silica gel column chromatography (elution with PE) gave the pure product

**28** as a light yellow oil (50.1 mg, 0.183 mmol, 61% yield).

**<sup>1</sup>H NMR** (500 MHz, CDCl<sub>3</sub>) δ 7.40 (d, *J* = 8.3 Hz, 2H), 7.14 – 7.06 (m, 6H), 4.08 (dd, *J* = 14.3, 7.1 Hz, 1H), 2.32 (s, 3H), 1.61 (d, *J* = 7.2 Hz, 3H).

**<sup>13</sup>C NMR** (126 MHz, CDCl<sub>3</sub>) δ 145.8, 142.9, 135.9, 131.5, 129.5, 129.3, 127.5, 119.9, 44.0, 21.9, 21.1.

**IR** (film): ν (cm<sup>-1</sup>) 3079, 3040, 2943, 2874, 1774, 1593, 1488, 1453, 1375, 1317, 1234, 1205, 1011, 977, 705, 513.

**HRMS** (ESI-TOF, *m/z*) calculated for C<sub>15</sub>H<sub>16</sub>Br<sup>+</sup> [*M*+*H*]<sup>+</sup> 275.0430, found 275.0438.

#### 1-bromo-4-(1-(4-(*tert*-butyl)phenyl)ethyl)benzene (**29**)

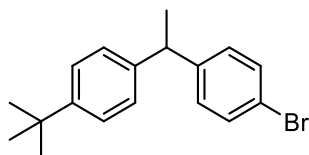

A Schlenk tube (10 mL) was charged with *tert*-butylbenzene (**1za**, 40.3 mg, 0.30 mmol), 4-bromoethylbenzene (**2f**, 164.8 mg, 0.90 mmol), FeBr<sub>3</sub> (17.7 mg, 0.11 mmol) and DCE (0.75 mL). The mixture was degassed *via* three freeze-pump-thaw cycles, then filled with dry air. The Schlenk tube was positioned approximately 5 cm away from a 50 W LED lamp (λ<sub>max</sub> = 410 nm). After being stirred at 25 °C for 48 h, the reaction mixture was concentrated to dryness. Purification using silica gel column chromatography (elution with PE) gave the pure product **29** as a light yellow oil (44.3 mg, 0.140 mmol, 47% yield).

**<sup>1</sup>H NMR** (500 MHz, CDCl<sub>3</sub>) δ 7.40 (d, *J* = 8.3 Hz, 2H), 7.32 (d, *J* = 8.2 Hz, 2H), 7.12 (dd, *J* = 10.8, 6.1 Hz, 4H), 4.09 (dd, *J* = 14.9, 7.7 Hz, 1H), 1.62 (d, *J* = 7.0 Hz, 3H), 1.31 (s, 9H).

**<sup>13</sup>C NMR** (126 MHz, CDCl<sub>3</sub>) δ 149.2, 145.8, 142.7, 131.5, 129.6, 127.2, 125.5, 119.9, 44.4, 43.9, 34.5, 31.5, 21.9.

**IR** (film): ν (cm<sup>-1</sup>) 3079, 3040, 2943, 2874, 1942, 1787, 1488, 1453, 1375, 1317, 1205, 1119, 927, 845, 553.

**HRMS** (ESI-TOF, *m/z*) calculated for C<sub>18</sub>H<sub>22</sub>Br<sup>+</sup> [*M*+*H*]<sup>+</sup> 317.0899, found 317.0885.

#### 4-(1-(4-bromophenyl)ethyl)-1,1'-biphenyl (**30**)

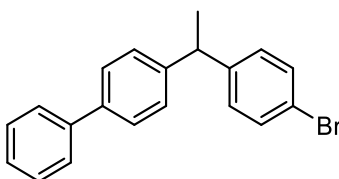

A Schlenk tube (10 mL) was charged with 1,1'-biphenyl (**1zb**, 46.3 mg, 0.30 mmol), 4-

bromoethylbenzene (**2f**, 164.8 mg, 0.90 mmol), FeBr<sub>3</sub> (17.7 mg, 0.11 mmol) and DCE (0.75 mL). The mixture was degassed *via* three freeze-pump-thaw cycles, then filled with dry air. The Schlenk tube was positioned approximately 5 cm away from a 50 W LED lamp ( $\lambda_{\text{max}}$  = 410 nm). After being stirred at 25 °C for 48 h, the reaction mixture was concentrated to dryness. Purification using silica gel column chromatography (elution with PE) gave the pure product **30** as a light yellow oil (53.8 mg, 0.160 mmol, 53% yield).

**<sup>1</sup>H NMR** (500 MHz, CDCl<sub>3</sub>)  $\delta$  7.57 (t,  $J$  = 6.5 Hz, 2H), 7.53 (d,  $J$  = 8.2 Hz, 2H), 7.44 – 7.41 (m, 4H), 7.34 (t,  $J$  = 7.4 Hz, 1H), 7.27 (d,  $J$  = 8.1 Hz, 2H), 7.14 (d,  $J$  = 8.3 Hz, 2H), 4.16 (q,  $J$  = 7.2 Hz, 1H), 1.66 (d,  $J$  = 7.2 Hz, 3H).

**<sup>13</sup>C NMR** (126 MHz, CDCl<sub>3</sub>)  $\delta$  145.4, 144.9, 141.0, 139.3, 131.6, 129.6, 128.9, 128.1, 127.3, 127.3, 127.2, 120.0, 44.1, 21.9.

**IR** (film):  $\nu$  (cm<sup>-1</sup>) 3111, 3079, 3066, 2973, 2876, 1944, 1594, 1401, 1317, 1155, 1011, 917, 765, 613, 478.

**HRMS** (ESI-TOF,  $m/z$ ) calculated for C<sub>20</sub>H<sub>18</sub>Br<sup>+</sup> [M+H]<sup>+</sup> 337.0586, found 337.0580.

#### 4-(1-(4-bromophenyl)ethyl)-4'-chloro-1,1'-biphenyl (**31**)

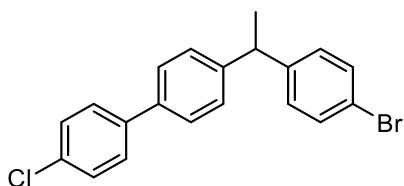

A Schlenk tube (10 mL) was charged with 4-chloro-1,1'-biphenyl (**1zc**, 56.6 mg, 0.30 mmol), 4-bromoethylbenzene (**2f**, 164.8 mg, 0.90 mmol), FeBr<sub>3</sub> (17.7 mg, 0.11 mmol) and DCE (0.75 mL). The mixture was degassed *via* three freeze-pump-thaw cycles, then filled with dry air. The Schlenk tube was positioned approximately 5 cm away from a 50 W LED lamp ( $\lambda_{\text{max}}$  = 410 nm). After being stirred at 25 °C for 48 h, the reaction mixture was concentrated to dryness. Purification using silica gel column chromatography (elution with PE) gave the pure product **31** as a light yellow oil (50.0 mg, 0.135 mmol, 45% yield).

**<sup>1</sup>H NMR** (500 MHz, CDCl<sub>3</sub>)  $\delta$  7.48 (dd,  $J$  = 8.2, 5.8 Hz, 4H), 7.40 (dd,  $J$  = 16.5, 8.4 Hz, 4H), 7.27 (s, 1H), 7.25 (s, 1H), 7.12 (d,  $J$  = 8.4 Hz, 2H), 4.15 (q,  $J$  = 7.2 Hz, 1H), 1.65 (d,  $J$  = 7.2 Hz, 3H).

**<sup>13</sup>C NMR** (126 MHz, CDCl<sub>3</sub>)  $\delta$  145.4, 145.3, 139.4, 138.1, 133.4, 131.6, 129.5, 129.0, 128.4, 128.2, 127.2, 120.1, 44.1, 21.8.

**IR** (film):  $\nu$  (cm<sup>-1</sup>) 3088, 3035, 1969, 1902, 1597, 1566, 1479, 1400, 1388, 1312, 1123, 1099, 1005, 911, 833, 707, 687, 544, 498.

**HRMS** (ESI-TOF,  $m/z$ ) calculated for C<sub>20</sub>H<sub>17</sub>BrCl<sup>+</sup> [M+H]<sup>+</sup> 371.0197, found 371.0191.

### 4-bromo-4'-(1-(4-bromophenyl)ethyl)-1,1'-biphenyl (**32**)

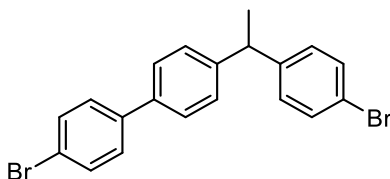

A Schlenk tube (10 mL) was charged with 4-bromo-1,1'-biphenyl (**1zd**, 69.9 mg, 0.30 mmol), 4-bromoethylbenzene (**2f**, 164.8 mg, 0.90 mmol), FeBr<sub>3</sub> (17.7 mg, 0.11 mmol) and DCE (0.75 mL). The mixture was degassed *via* three freeze-pump-thaw cycles, then filled with dry air. The Schlenk tube was positioned approximately 5 cm away from a 50 W LED lamp ( $\lambda_{\text{max}}$  = 410 nm). After being stirred at 25 °C for 48 h, the reaction mixture was concentrated to dryness. Purification using silica gel column chromatography (elution with PE) gave the pure product **32** as a yellow oil (58.3 mg, 0.141 mmol, 47% yield).

**<sup>1</sup>H NMR** (500 MHz, CDCl<sub>3</sub>)  $\delta$  7.53 (d,  $J$  = 8.2 Hz, 2H), 7.46 (d,  $J$  = 7.9 Hz, 2H), 7.41 (d,  $J$  = 8.3 Hz, 4H), 7.26 – 7.23 (m, 2H), 7.11 (d,  $J$  = 8.2 Hz, 2H), 4.14 (q,  $J$  = 7.1 Hz, 1H), 1.64 (d,  $J$  = 7.1 Hz, 3H).

**<sup>13</sup>C NMR** (126 MHz, CDCl<sub>3</sub>)  $\delta$  145.4, 145.3, 139.9, 138.1, 132.0, 131.7, 129.5, 128.7, 128.2, 127.1, 121.5, 120.1, 44.1, 21.8.

**IR** (film):  $\nu$  (cm<sup>-1</sup>) 3128, 3031, 2066, 1908, 1587, 1551, 1449, 1388, 1309, 1019, 1007, 991, 830, 755, 691, 636, 544.

**HRMS** (ESI-TOF,  $m/z$ ) calculated for C<sub>20</sub>H<sub>17</sub>Br<sub>2</sub><sup>+</sup> [M+H]<sup>+</sup> 414.9692, found 414.9698.

### 3-(1-([1,1'-biphenyl]-4-yl)ethyl)-1H-indole (**33**)

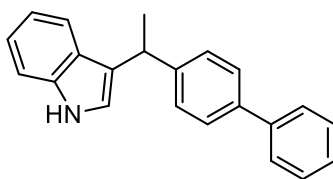

A Schlenk tube (10 mL) was charged with indole (**1ze**, 35.1 mg, 0.30 mmol), 4-ethylbiphenyl (**2a**, 164.0 mg, 0.90 mmol), FeCl<sub>3</sub>·6H<sub>2</sub>O (16.2 mg, 0.060 mmol) and CH<sub>2</sub>Cl<sub>2</sub> (0.75 mL). The mixture was degassed *via* three freeze-pump-thaw cycles, then filled with dry air. The Schlenk tube was positioned approximately 5 cm away from a 50 W LED lamp ( $\lambda_{\text{max}}$  = 410 nm). After being stirred at 25 °C for 48 h, the reaction mixture was concentrated to dryness. Purification using silica gel column chromatography (elution with PE:DCM = 2:1) gave the pure product **33** as a yellow oil (51.7 mg, 0.174 mmol, 58% yield).

**<sup>1</sup>H NMR** (500 MHz, CDCl<sub>3</sub>)  $\delta$  7.98 (s, 1H), 7.59 (d,  $J$  = 1.3 Hz, 1H), 7.57 (d,  $J$  = 0.9 Hz, 1H), 7.51 (d,  $J$  = 8.2 Hz, 2H), 7.41 (d,  $J$  = 7.9 Hz, 3H), 7.38 (s, 1H), 7.37 – 7.35 (m, 2H), 7.33 (d,  $J$  = 7.4 Hz, 1H), 7.19 – 7.15 (m, 1H), 7.06 – 7.01 (m, 2H), 4.45 – 4.41 (m, 1H), 1.75 (d,  $J$  = 7.2

Hz, 3H).

**<sup>13</sup>C NMR** (126 MHz, CDCl<sub>3</sub>) δ 146.1, 141.3, 138.9, 136.7, 128.8, 128.0, 127.2, 127.1, 127.1, 127.0, 122.2, 121.5, 121.2, 119.9, 119.4, 111.2, 36.7, 22.5 .

**IR** (film): ν (cm<sup>-1</sup>) 3888, 3497, 3400, 3060, 2856, 1613, 1577, 1487, 1358, 1092, 1011, 933, 870, 775, 738, 612, 487.

**HRMS** (ESI-TOF, m/z) calculated for C<sub>22</sub>H<sub>20</sub>N<sup>+</sup> [M+H]<sup>+</sup> 298.1590, found 29.1596.

### 7-bromo-3-(1-(4-fluorophenyl)ethyl)-1H-indole (34)

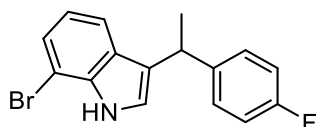

A Schlenk tube (10 mL) was charged with 7-bromo-1H-indole (**1zf**, 58.8 mg, 0.30 mmol), 1-bromo-4-isopropylbenzene (**2d**, 179.2 mg, 0.90 mmol), FeCl<sub>3</sub>·6H<sub>2</sub>O (16.2 mg, 0.060 mmol) and CH<sub>2</sub>Cl<sub>2</sub> (0.75 mL). The mixture was degassed *via* three freeze-pump-thaw cycles, then filled with dry air. The Schlenk tube was positioned approximately 5 cm away from a 50 W LED lamp (λ<sub>max</sub> = 410 nm). After being stirred at 25 °C for 48 h, the reaction mixture was concentrated to dryness. Purification using silica gel column chromatography (elution with PE:DCM = 2:1) gave the pure product **34** as a light yellow oil (47.7 mg, 0.149 mmol, 50% yield).

**<sup>1</sup>H NMR** (500 MHz, CDCl<sub>3</sub>) δ 8.18 (s, 1H), 7.31 (d, *J* = 7.3 Hz, 1H), 7.24 – 7.19 (m, 3H), 7.09 (dd, *J* = 2.2, 0.8 Hz, 1H), 6.95 (td, *J* = 6.6, 3.3 Hz, 2H), 6.89 (t, *J* = 7.8 Hz, 1H), 4.33 (q, *J* = 7.1 Hz, 1H), 1.68 (d, *J* = 7.1 Hz, 3H).

**<sup>13</sup>C NMR** (126 MHz, CDCl<sub>3</sub>) δ 161.4, 142.2, 135.5, 128.9, 128.1, 124.5, 122.6, 121.7, 120.6, 119.0, 115.2, 104.8, 36.5, 22.6.

**IR** (film): ν (cm<sup>-1</sup>) 3870, 3512, 3411, 3123, 2907, 1663, 1607, 1423, 1366, 1083, 999, 941, 795, 765, 723, 506, 487.

**HRMS** (ESI-TOF, m/z) calculated for C<sub>16</sub>H<sub>14</sub>BrFN<sup>+</sup> [M+H]<sup>+</sup> 318.0288, found 318.0297.

### 7-bromo-3-(2-(4-bromophenyl)propan-2-yl)-1H-indole (35)

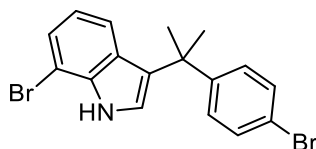

A Schlenk tube (10 mL) was charged with 7-bromo-1H-indole (**1zf**, 58.8 mg, 0.30 mmol), 1-bromo-4-isopropylbenzene (**2zk**, 179.2 mg, 0.90 mmol), FeCl<sub>3</sub>·6H<sub>2</sub>O (16.2 mg, 0.060 mmol) and CH<sub>2</sub>Cl<sub>2</sub> (0.75 mL). The mixture was degassed *via* three freeze-pump-thaw cycles, then

filled with dry air. The Schlenk tube was positioned approximately 5 cm away from a 50 W LED lamp ( $\lambda_{\text{max}} = 410$  nm). After being stirred at 25 °C for 48 h, the reaction mixture was concentrated to dryness. Purification using silica gel column chromatography (elution with PE:DCM = 2:1) gave the pure product **35** as a light yellow oil (57.8 mg, 0.147 mmol, 49% yield).

**$^1\text{H}$  NMR** (500 MHz,  $\text{CDCl}_3$ )  $\delta$  8.17 (s, 1H), 7.42 – 7.39 (m, 2H), 7.34 – 7.32 (m, 1H), 7.25 – 7.22 (m, 2H), 7.19 (d,  $J = 2.4$  Hz, 1H), 7.02 (d,  $J = 8.0$  Hz, 1H), 6.83 (t,  $J = 7.8$  Hz, 1H), 1.78 (s, 6H).

**$^{13}\text{C}$  NMR** (126 MHz,  $\text{CDCl}_3$ )  $\delta$  148.7, 135.8, 131.2, 128.4, 127.1, 126.8, 124.3, 121.3, 120.43, 120.4, 119.7, 104.9, 39.0, 30.6.

**IR** (film):  $\nu$  ( $\text{cm}^{-1}$ ) 3300, 3085, 2927, 2887, 1663, 1555, 1423, 1326, 1300, 10832, 921, 906, 533.

**HRMS** (ESI-TOF,  $m/z$ ) calculated for  $\text{C}_{17}\text{H}_{16}\text{Br}_2\text{N}^+$   $[\text{M}+\text{H}]^+$  393.9624, found 393.9622.

### 3-(1-([1,1'-biphenyl]-4-yl)ethyl)-5-bromo-1-methyl-1H-indole (**36**)

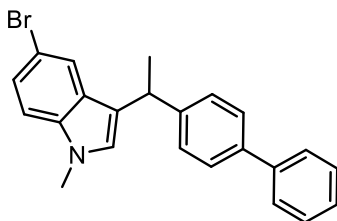

A Schlenk tube (10 mL) was charged with 5-bromo-1-methyl-1H-indole (**1zg**, 63.0 mg, 0.30 mmol), 4-ethylbiphenyl (**2a**, 164.0 mg, 0.90 mmol),  $\text{FeCl}_3 \cdot 6\text{H}_2\text{O}$  (16.2 mg, 0.060 mmol) and  $\text{CH}_2\text{Cl}_2$  (0.75 mL). The mixture was degassed *via* three freeze-pump-thaw cycles, then filled with dry air. The Schlenk tube was positioned approximately 5 cm away from a 50 W LED lamp ( $\lambda_{\text{max}} = 410$  nm). After being stirred at 25 °C for 48 h, the reaction mixture was concentrated to dryness. Purification using silica gel column chromatography (elution with PE:DCM = 2:1) gave the pure product **36** as a yellow oil (71.2 mg, 0.183 mmol, 61% yield).

**$^1\text{H}$  NMR** (500 MHz,  $\text{CDCl}_3$ )  $\delta$  7.63 – 7.59 (m, 3H), 7.55 (d,  $J = 8.0$  Hz, 2H), 7.45 (t,  $J = 7.6$  Hz, 2H), 7.37 (d,  $J = 8.1$  Hz, 2H), 7.36 – 7.33 (m, 1H), 7.29 (dd,  $J = 8.6, 1.3$  Hz, 1H), 7.16 (d,  $J = 8.7$  Hz, 1H), 6.89 (s, 1H), 4.38 (q,  $J = 7.1$  Hz, 1H), 3.74 (s, 3H), 1.74 (d,  $J = 7.2$  Hz, 3H).

**$^{13}\text{C}$  NMR** (126 MHz,  $\text{CDCl}_3$ )  $\delta$  145.6, 141.1, 139.0, 136.04, 128.9, 128.8, 127.8, 127.2, 127.1, 124.5, 122.2, 119.6, 112.2, 110.7, 36.4, 32.9, 22.5.

**IR** (film):  $\nu$  ( $\text{cm}^{-1}$ ) 3436, 2907, 1632, 1503, 1334, 1250, 1197, 899, 854, 606.

**HRMS** (ESI-TOF,  $m/z$ ) calculated for  $\text{C}_{23}\text{H}_{21}\text{BrN}^+$   $[\text{M}+\text{H}]^+$  390.0852, found 390.0859.

**1-(3-(1-([1,1'-biphenyl]-4-yl)ethyl)-1*H*-indol-1-yl)ethan-1-one (37)**

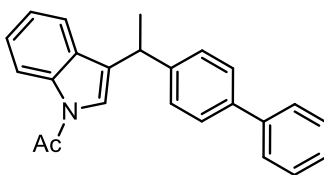

A Schlenk tube (10 mL) was charged with 1-(1*H*-indol-1-yl)ethan-1-one (**1zh**, 47.8 mg, 0.30 mmol), 4-ethylbiphenyl (**2a**, 164.0 mg, 0.90 mmol), FeCl<sub>3</sub>·6H<sub>2</sub>O (16.2 mg, 0.060 mmol) and CH<sub>2</sub>Cl<sub>2</sub> (0.75 mL). The mixture was degassed *via* three freeze-pump-thaw cycles, then filled with dry air. The Schlenk tube was positioned approximately 5 cm away from a 50 W LED lamp ( $\lambda_{\text{max}}$  = 410 nm). After being stirred at 25 °C for 48 h, the reaction mixture was concentrated to dryness. Purification using silica gel column chromatography (elution with PE:DCM = 2:1) gave the pure product **37** as a light yellow oil (71.3 mg, 0.210 mmol, 70% yield).

**<sup>1</sup>H NMR** (500 MHz, CDCl<sub>3</sub>)  $\delta$  8.46 (s, 1H), 7.60 (d,  $J$  = 7.5 Hz, 2H), 7.56 (d,  $J$  = 8.2 Hz, 2H), 7.44 (t,  $J$  = 7.7 Hz, 2H), 7.39 – 7.29 (m, 6H), 7.21 (d,  $J$  = 7.4 Hz, 1H), 4.36 (q,  $J$  = 7.0 Hz, 1H), 2.66 (s, 3H), 1.77 (d,  $J$  = 7.1 Hz, 3H).

**<sup>13</sup>C NMR** (126 MHz, CDCl<sub>3</sub>)  $\delta$  168.6, 144.2, 140.9, 139.4, 136.4, 130.2, 128.8, 127.8, 127.5, 127.4, 127.3, 127.1, 125.3, 123.5, 121.9, 120.0, 116.7, 36.5, 24.2, 22.0.

**IR** (film):  $\nu$  (cm<sup>-1</sup>) 3103, 1751, 1748, 1511, 1498, 1388, 1365, 1300, 1227, 1078, 993, 755, 739, 480.

**HRMS** (ESI-TOF,  $m/z$ ) calculated for C<sub>24</sub>H<sub>22</sub>NO<sup>+</sup> [M+H]<sup>+</sup> 340.1696, found 340.1703.

**1-(3-(1-([1,1'-biphenyl]-4-yl)ethyl)-4-fluoro-1*H*-indol-1-yl)ethan-1-one (38)**

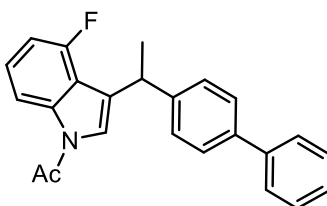

A Schlenk tube (10 mL) was charged with 1-(4-fluoro-1*H*-indol-1-yl)ethan-1-one (**1zi**, 53.1 mg, 0.30 mmol), 4-ethylbiphenyl (**2a**, 164.0 mg, 0.90 mmol), FeCl<sub>3</sub>·6H<sub>2</sub>O (16.2 mg, 0.060 mmol) and CH<sub>2</sub>Cl<sub>2</sub> (0.75 mL). The mixture was degassed *via* three freeze-pump-thaw cycles, then filled with dry air. The Schlenk tube was positioned approximately 5 cm away from a 50 W LED lamp ( $\lambda_{\text{max}}$  = 410 nm). After being stirred at 25 °C for 48 h, the reaction mixture was concentrated to dryness. Purification using silica gel column chromatography (elution with PE:DCM = 2:1) gave the pure product **38** as a light yellow oil (68.6 mg, 0.192 mmol, 64% yield).

**<sup>1</sup>H NMR** (500 MHz, CDCl<sub>3</sub>) δ 8.30 (d, *J* = 7.5 Hz, 1H), 7.64 (d, *J* = 7.7 Hz, 2H), 7.59 (d, *J* = 8.0 Hz, 2H), 7.47 (t, *J* = 7.6 Hz, 2H), 7.42 (d, *J* = 7.9 Hz, 2H), 7.37 (t, *J* = 7.3 Hz, 1H), 7.31 – 7.28 (m, 1H), 7.19 (s, 1H), 6.94 (dd, *J* = 10.2, 8.5 Hz, 1H), 4.61 (q, *J* = 6.9 Hz, 1H), 2.65 (s, 3H), 1.78 (d, *J* = 7.1 Hz, 3H).

**<sup>13</sup>C NMR** (126 MHz, CDCl<sub>3</sub>) δ 168.6, 156.4, 144.3, 141.0, 139.3, 138.4 (d, *J*<sub>C-F</sub> = 40.0 Hz), 128.8, 127.9, 127.2, 127.2, 127.1, 126.6, 126.2, 121.9, 118.5 (d, *J*<sub>C-F</sub> = 75.0 Hz), 112.8, 109.6 (d, *J*<sub>C-F</sub> = 75.0 Hz), 37.0, 24.2, 22.3.

**IR** (film): *ν* (cm<sup>-1</sup>) 3133, 1762, 1750, 1563, 1505, 1383, 1375, 1290, 1287, 1118, 1074, 988, 753, 750, 741, 550.

**HRMS** (ESI-TOF, *m/z*) calculated for C<sub>24</sub>H<sub>21</sub>FNO<sup>+</sup> [*M*+*H*]<sup>+</sup> 358.1602, found 358.1599.

**1-(3-(1-([1,1'-biphenyl]-4-yl)ethyl)-4-chloro-1*H*-indol-1-yl)ethan-1-one (39)**

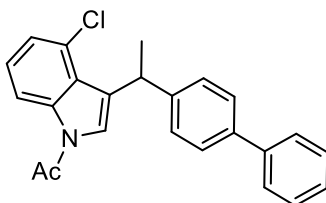

A Schlenk tube (10 mL) was charged with 1-(4-chloro-1*H*-indol-1-yl)ethan-1-one (**1zj**, 57.9 mg, 0.30 mmol), 4-ethylbiphenyl (**2a**, 164.0 mg, 0.90 mmol), FeCl<sub>3</sub>·6H<sub>2</sub>O (16.2 mg, 0.060 mmol) and CH<sub>2</sub>Cl<sub>2</sub> (0.75 mL). The mixture was degassed *via* three freeze-pump-thaw cycles, then filled with dry air. The Schlenk tube was positioned approximately 5 cm away from a 50 W LED lamp (*λ*<sub>max</sub> = 410 nm). After being stirred at 25 °C for 48 h, the reaction mixture was concentrated to dryness. Purification using silica gel column chromatography (elution with PE:DCM = 2:1) gave the pure product **39** as a light yellow oil (78.4 mg, 0.210 mmol, 70% yield).

**<sup>1</sup>H NMR** (500 MHz, CDCl<sub>3</sub>) δ 8.46 (d, *J* = 7.8 Hz, 1H), 7.60 (d, *J* = 7.3 Hz, 2H), 7.55 (d, *J* = 8.2 Hz, 2H), 7.43 (t, *J* = 7.7 Hz, 2H), 7.36 – 7.31 (m, 3H), 7.25 – 7.19 (m, 3H), 5.01 (q, *J* = 7.0 Hz, 1H), 2.61 (s, 3H), 1.74 (d, *J* = 7.1 Hz, 3H).

**<sup>13</sup>C NMR** (126 MHz, CDCl<sub>3</sub>) δ 168.4, 144.9, 141.0, 139.1, 137.8, 128.8, 128.1, 127.7, 127.2, 127.1, 126.9, 126.5, 126.0, 125.1, 123.7, 115.4, 36.2, 24.2, 23.3.

**IR** (film): *ν* (cm<sup>-1</sup>) 3133, 1762, 1750, 1563, 1505, 1383, 1375, 1290, 1287, 1118, 1074, 988, 753, 750, 741, 550.

**HRMS** (ESI-TOF, *m/z*) calculated for C<sub>24</sub>H<sub>21</sub>ClNO<sup>+</sup> [*M*+*H*]<sup>+</sup> 374.1306, found 374.1310.

**1-(3-(1-([1,1'-biphenyl]-4-yl)ethyl)-4-bromo-1*H*-indol-1-yl)ethan-1-one (40)**

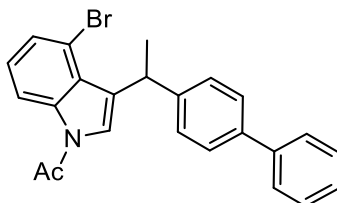

A Schlenk tube (10 mL) was charged with 1-(4-bromo-1*H*-indol-1-yl)ethan-1-one (**1zk**, 71.1 mg, 0.30 mmol), 4-ethylbiphenyl (**2a**, 164.0 mg, 0.90 mmol), FeCl<sub>3</sub>·6H<sub>2</sub>O (16.2 mg, 0.060 mmol) and CH<sub>2</sub>Cl<sub>2</sub> (0.75 mL). The mixture was degassed *via* three freeze-pump-thaw cycles, then filled with dry air. The Schlenk tube was positioned approximately 5 cm away from a 50 W LED lamp ( $\lambda_{\text{max}}$  = 410 nm). After being stirred at 25 °C for 48 h, the reaction mixture was concentrated to dryness. Purification using silica gel column chromatography (elution with PE:DCM = 2:1) gave the pure product **40** as a light yellow oil (90.0 mg, 0.216 mmol, 72% yield).

**<sup>1</sup>H NMR** (500 MHz, CDCl<sub>3</sub>)  $\delta$  8.48 (d,  $J$  = 8.3 Hz, 1H), 7.54 (d,  $J$  = 7.6 Hz, 2H), 7.49 (d,  $J$  = 8.2 Hz, 2H), 7.36 (dd,  $J$  = 8.2, 7.4 Hz, 3H), 7.28 (d,  $J$  = 8.1 Hz, 3H), 7.17 (s, 1H), 7.09 (t,  $J$  = 8.1 Hz, 1H), 5.06 (q,  $J$  = 7.0 Hz, 1H), 2.51 (s, 3H), 1.68 (d,  $J$  = 7.1 Hz, 3H).

**<sup>13</sup>C NMR** (126 MHz, CDCl<sub>3</sub>)  $\delta$  168.3, 144.8, 140.9, 139.0, 137.7, 128.8, 128.6, 128.2, 128.1, 127.9, 127.2, 127.1, 127.0, 126.2, 124.1, 115.9, 114.2, 35.7, 24.1, 23.3.

**IR** (film):  $\nu$  (cm<sup>-1</sup>) 3099, 1801, 1766, 1569, 1522, 1381, 1352, 1287, 1279, 1101, 1032, 996, 773, 741, 670.

**HRMS** (ESI-TOF,  $m/z$ ) calculated for C<sub>24</sub>H<sub>21</sub>BrNO<sup>+</sup> [M+H]<sup>+</sup> 418.0801, found 418.0800.

**1-(3-(1-([1,1'-biphenyl]-4-yl)ethyl)-4-methyl-1*H*-indol-1-yl)ethan-1-one (41)**

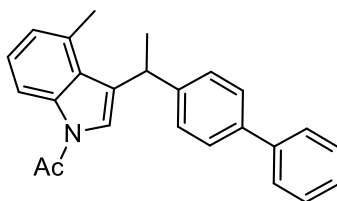

A Schlenk tube (10 mL) was charged with 1-(5-methyl-1*H*-indol-1-yl)ethan-1-one (**1zl**, 51.9 mg, 0.30 mmol), 4-ethylbiphenyl (**2a**, 164.0 mg, 0.90 mmol), FeCl<sub>3</sub>·6H<sub>2</sub>O (16.2 mg, 0.060 mmol) and CH<sub>2</sub>Cl<sub>2</sub> (0.75 mL). The mixture was degassed *via* three freeze-pump-thaw cycles, then filled with dry air. The Schlenk tube was positioned approximately 5 cm away from a 50 W LED lamp ( $\lambda_{\text{max}}$  = 410 nm). After being stirred at 25 °C for 48 h, the reaction mixture was concentrated to dryness. Purification using silica gel column chromatography (elution with PE:DCM = 2:1) gave the pure product **41** as a light yellow oil (72.0 mg, 0.203 mmol, 68% yield).

**<sup>1</sup>H NMR** (500 MHz, CDCl<sub>3</sub>) δ 8.42 (d, *J* = 7.6 Hz, 1H), 7.61 (d, *J* = 7.2 Hz, 2H), 7.56 (d, *J* = 8.2 Hz, 2H), 7.47 (d, *J* = 7.5 Hz, 2H), 7.37 (t, *J* = 6.7 Hz, 2H), 7.29 (dd, *J* = 10.7, 2.5 Hz, 3H), 7.25 (d, *J* = 8.0 Hz, 1H), 6.99 (d, *J* = 7.3 Hz, 1H), 2.71 (s, 3H), 2.45 (s, 3H), 1.76 (d, *J* = 7.1 Hz, 3H).

**<sup>13</sup>C NMR** (126 MHz, CDCl<sub>3</sub>) δ 168.6, 145.5, 140.9, 139.2, 137.0, 131.3, 128.9, 127.9, 127.7, 127.4, 127.3, 127.1, 125.9, 125.4, 122.8, 114.5, 37.4, 24.4, 24.0, 20.5.

**IR** (film):  $\nu$  (cm<sup>-1</sup>) 3406, 3104, 3034, 2903, 1771, 1584, 1436, 1411, 1356, 1238, 1081, 1033, 895, 721, 502.

**HRMS** (ESI-TOF, *m/z*) calculated for C<sub>25</sub>H<sub>24</sub>NO<sup>+</sup> [*M*+H]<sup>+</sup> 354.1852, found 354.1857.

**1-(3-(1-([1,1'-biphenyl]-4-yl)ethyl)-5-bromo-1*H*-indol-1-yl)ethan-1-one (42)**

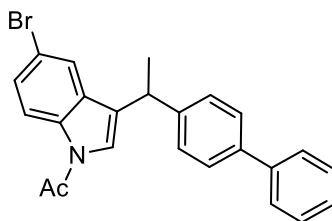

A Schlenk tube (10 mL) was charged with 1-(5-bromo-1*H*-indol-1-yl)ethan-1-one (**1zm**, 71.1 mg, 0.30 mmol), 4-ethylbiphenyl (**2a**, 164.0 mg, 0.90 mmol), FeCl<sub>3</sub>·6H<sub>2</sub>O (16.2 mg, 0.060 mmol) and CH<sub>2</sub>Cl<sub>2</sub> (0.75 mL). The mixture was degassed *via* three freeze-pump-thaw cycles, then filled with dry air. The Schlenk tube was positioned approximately 5 cm away from a 50 W LED lamp ( $\lambda_{\text{max}}$  = 410 nm). After being stirred at 25 °C for 48 h, the reaction mixture was concentrated to dryness. Purification using silica gel column chromatography (elution with PE:DCM = 2:1) gave the pure product **42** as a light yellow oil (91.3 mg, 0.219 mmol, 73% yield).

**<sup>1</sup>H NMR** (500 MHz, CDCl<sub>3</sub>) δ 8.60 (d, *J* = 8.3 Hz, 1H), 7.66 (d, *J* = 7.3 Hz, 2H), 7.61 (d, *J* = 8.2 Hz, 2H), 7.48 (t, *J* = 7.9 Hz, 3H), 7.40 (d, *J* = 8.0 Hz, 3H), 7.29 (s, 1H), 7.22 (t, *J* = 8.1 Hz, 1H), 5.19 (q, *J* = 7.0 Hz, 1H), 2.63 (s, 3H), 1.80 (d, *J* = 7.1 Hz, 3H).

**<sup>13</sup>C NMR** (126 MHz, CDCl<sub>3</sub>) δ 168.3, 144.8, 140.9, 139.0, 137.7, 128.8, 128.6, 128.1, 128.1, 127.9, 127.2, 127.1, 127.0, 126.2, 124.1, 115.9, 114.2, 35.7, 24.1, 23.3.

**IR** (film):  $\nu$  (cm<sup>-1</sup>) 3413, 3108, 2923, 1571, 1569, 1436, 1463, 1642, 1109, 1081, 929, 883, 733, 506.

**HRMS** (ESI-TOF, *m/z*) calculated for C<sub>24</sub>H<sub>21</sub>BrNO<sup>+</sup> [*M*+H]<sup>+</sup> 418.0801, found 418.0817.

### 2-(1-([1,1'-biphenyl]-4-yl)ethyl)-1-tosyl-1H-pyrrole (**43**)

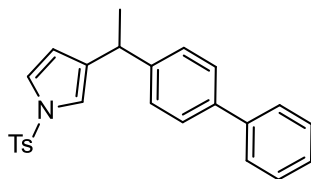

A Schlenk tube (10 mL) was charged with 1-tosyl-1H-pyrrole (**1zn**, 66.3 mg, 0.30 mmol), 4-ethylbiphenyl (**2a**, 164.0 mg, 0.90 mmol), FeCl<sub>3</sub>·6H<sub>2</sub>O (16.2 mg, 0.060 mmol) and CH<sub>2</sub>Cl<sub>2</sub> (0.75 mL). The mixture was degassed *via* three freeze-pump-thaw cycles, then filled with dry air. The Schlenk tube was positioned approximately 5 cm away from a 50 W LED lamp ( $\lambda_{\text{max}}$  = 410 nm). After being stirred at 25 °C for 48 h, the reaction mixture was concentrated to dryness. Purification using silica gel column chromatography (elution with PE:DCM = 2:1) gave the pure product **43** as a yellow oil (54.1 mg, 0.135 mmol, 45% yield).

**<sup>1</sup>H NMR** (500 MHz, CDCl<sub>3</sub>)  $\delta$  7.54 – 7.51 (m, 2H), 7.43 (t,  $J$  = 7.7 Hz, 2H), 7.36 – 7.32 (m, 2H), 7.29 (d,  $J$  = 8.2 Hz, 2H), 7.25 (d,  $J$  = 8.3 Hz, 2H), 6.97 (t,  $J$  = 7.9 Hz, 4H), 6.31 (t,  $J$  = 3.4 Hz, 1H), 6.27 (s, 1H), 4.72 (q,  $J$  = 7.1 Hz, 1H), 2.19 (s, 3H), 1.53 (d,  $J$  = 7.2 Hz, 3H).

**<sup>13</sup>C NMR** (126 MHz, CDCl<sub>3</sub>)  $\delta$  144.2, 144.2, 141.0, 139.1, 138.9, 136.3, 129.6, 128.9, 127.9, 127.2, 127.0, 126.9, 126.7, 123.1, 112.7, 111.2, 36.9, 23.9, 21.5.

**IR** (film):  $\nu$  (cm<sup>-1</sup>) 3111, 3097, 1750, 1662, 1500, 1342, 1286, 1084, 1072, 1002, 975, 959, 742, 662, 511.

**HRMS** (ESI-TOF,  $m/z$ ) calculated for C<sub>25</sub>H<sub>24</sub>NO<sub>2</sub>S<sup>+</sup> [M+H]<sup>+</sup> 402.1522, found 402.1530.

### 1-phenoxy-4-(1-phenylethyl)benzene (**44**)

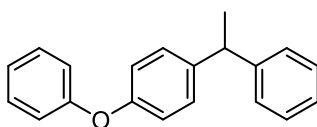

A Schlenk tube (10 mL) was charged with diphenyl ether (**1d**, 51.1 mg, 0.30 mmol), ethylbenzene (**2b**, 95.6 mg, 0.90 mmol), FeCl<sub>3</sub>·6H<sub>2</sub>O (16.2 mg, 0.060 mmol) and (CHCl<sub>2</sub>)<sub>2</sub> (0.75 mL). The mixture was degassed *via* three freeze-pump-thaw cycles, then filled with dry air. The Schlenk tube was positioned approximately 5 cm away from a 50 W LED lamp ( $\lambda_{\text{max}}$  = 410 nm). After being stirred at 25 °C for 48 h, the reaction mixture was concentrated to dryness. Purification using silica gel column chromatography (elution with PE:DCM = 5:1) gave the pure product **44** as a colorless oil (57.5 mg, 0.209 mmol, 70% yield).

**<sup>1</sup>H NMR** (500 MHz, CDCl<sub>3</sub>)  $\delta$  7.36 (q,  $J$  = 7.8 Hz, 4H), 7.29 (t,  $J$  = 7.6 Hz, 2H), 7.23 (d,  $J$  = 8.5 Hz, 3H), 7.13 (t,  $J$  = 7.2 Hz, 1H), 7.05 (d,  $J$  = 8.3 Hz, 2H), 6.98 (d,  $J$  = 8.4 Hz, 2H), 4.19 (q,  $J$  = 7.1 Hz, 1H), 1.69 (d,  $J$  = 7.2 Hz, 3H).

**<sup>13</sup>C NMR** (126 MHz, CDCl<sub>3</sub>) δ 157.6, 155.4, 146.6, 141.5, 129.8, 128.9, 128.5, 127.7, 126.2, 123.2, 119.0, 118.8, 44.3, 22.2.

**IR** (film): ν (cm<sup>-1</sup>) 3110, 3084, 3074, 2963, 2877, 1981, 1496, 1488, 1336, 1321, 1240, 1076, 1031, 964, 881, 492, 480.

**HRMS** (ESI-TOF, m/z) calculated for C<sub>20</sub>H<sub>19</sub>O<sup>+</sup> [M+H]<sup>+</sup> 275.1430, found 275.1434.

#### 1-ethyl-4-(1-(4-phenoxyphenyl)ethyl)benzene (**45**)

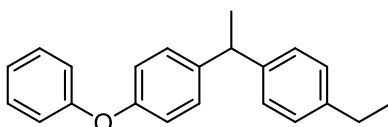

A Schlenk tube (10 mL) was charged with diphenyl ether (**1d**, 51.1 mg, 0.30 mmol), 1,4-diethylbenzene (**2c**, 120.8 mg, 0.90 mmol), FeCl<sub>3</sub>·6H<sub>2</sub>O (16.2 mg, 0.060 mmol) and (CHCl<sub>2</sub>)<sub>2</sub> (0.75 mL). The mixture was degassed *via* three freeze-pump-thaw cycles, then filled with dry air. The Schlenk tube was positioned approximately 5 cm away from a 50 W LED lamp (λ<sub>max</sub> = 410 nm). After being stirred at 25 °C for 48 h, the reaction mixture was concentrated to dryness. Purification using silica gel column chromatography (elution with PE:DCM = 5:1) gave the pure product **45** as a colorless oil (67.0 mg, 0.222 mmol, 74% yield).

**<sup>1</sup>H NMR** (500 MHz, CDCl<sub>3</sub>) δ 7.28 (m, 2H), 7.16 (d, *J* = 8.5 Hz, 2H), 7.14 – 7.10 (m, 4H), 7.04 (t, *J* = 7.4 Hz, 1H), 6.97 (d, *J* = 7.7 Hz, 2H), 6.94 – 6.88 (m, 2H), 4.09 (q, *J* = 7.2 Hz, 1H), 2.60 (q, *J* = 7.6 Hz, 2H), 1.60 (d, *J* = 7.2 Hz, 3H), 1.21 (t, *J* = 7.6 Hz, 3H).

**<sup>13</sup>C NMR** (126 MHz, CDCl<sub>3</sub>) δ 157.6, 155.3, 143.8, 142.0, 141.7, 129.8, 128.9, 128.0, 127.6, 123.1, 118.9, 118.8, 43.9, 28.5, 22.2, 15.7.

**IR** (film): ν (cm<sup>-1</sup>) 3134, 3091, 3078, 2929, 1790, 1673, 1516, 1312, 1234, 1022, 985, 971, 943, 800, 611, 547.

**HRMS** (ESI-TOF, m/z) calculated for C<sub>22</sub>H<sub>23</sub>O<sup>+</sup> [M+H]<sup>+</sup> 303.1743, found 303.1737.

#### 1-fluoro-4-(1-(4-phenoxyphenyl)ethyl)benzene (**46**)

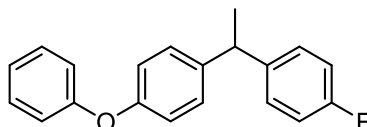

A Schlenk tube (10 mL) was charged with diphenyl ether (**1d**, 51.1 mg, 0.30 mmol), 1-ethyl-4-fluorobenzene (**2d**, 111.7 mg, 0.90 mmol), FeCl<sub>3</sub>·6H<sub>2</sub>O (16.2 mg, 0.060 mmol) and (CHCl<sub>2</sub>)<sub>2</sub> (0.75 mL). The mixture was degassed *via* three freeze-pump-thaw cycles, then filled with dry air. The Schlenk tube was positioned approximately 5 cm away from a 50 W LED lamp (λ<sub>max</sub> = 410 nm). After being stirred at 25 °C for 48 h, the reaction mixture was concentrated to

dryness. Purification using silica gel column chromatography (elution with PE:DCM = 5:1) gave the pure product **46** as a colorless oil (60.4 mg, 0.207 mmol, 69% yield).

**<sup>1</sup>H NMR** (500 MHz, CDCl<sub>3</sub>) δ 7.34 (t, *J* = 7.9 Hz, 2H), 7.21 – 7.16 (m, 4H), 7.10 (t, *J* = 7.4 Hz, 1H), 7.07 – 6.92 (m, 6H), 4.14 (q, *J* = 7.2 Hz, 1H), 1.63 (d, *J* = 7.2 Hz, 3H).

**<sup>13</sup>C NMR** (126 MHz, CDCl<sub>3</sub>) δ 162.4, 160.4, 157.5, 155.6, 142.2, 141.2, 129.8 (d, *J*<sub>C-F</sub> = 30.0 Hz), 129.1, 128.8, 123.2, 118.9 (d, *J*<sub>C-F</sub> = 45.0 Hz), 115.3 (d, *J*<sub>C-F</sub> = 85.0 Hz), 43.5, 22.3.

**IR** (film): ν (cm<sup>-1</sup>) 3066, 3055, 1597, 1526, 1501, 1476, 1342, 1286, 1223, 1058, 1032, 1011, 975, 961, 899, 742, 519, 481.

**HRMS** (ESI-TOF, *m/z*) calculated for C<sub>20</sub>H<sub>18</sub>FO<sup>+</sup> [M+H]<sup>+</sup> 293.1336, found 293.1344.

#### 1-chloro-4-(1-(4-phenoxyphenyl)ethyl)benzene (**47**)

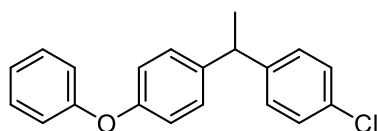

A Schlenk tube (10 mL) was charged with diphenyl ether (**1d**, 51.1 mg, 0.30 mmol), 1-chloro-4-ethylbenzene (**2e**, 126.5 mg, 0.90 mmol), FeCl<sub>3</sub>·6H<sub>2</sub>O (16.2 mg, 0.060 mmol) and (CHCl<sub>2</sub>)<sub>2</sub> (0.75 mL). The mixture was degassed *via* three freeze-pump-thaw cycles, then filled with dry air. The Schlenk tube was positioned approximately 5 cm away from a 50 W LED lamp (λ<sub>max</sub> = 410 nm). After being stirred at 25 °C for 48 h, the reaction mixture was concentrated to dryness. Purification using silica gel column chromatography (elution with PE:DCM = 5:1) gave the pure product **47** as a colorless oil (62.9 mg, 0.204 mmol, 68% yield).

**<sup>1</sup>H NMR** (500 MHz, CDCl<sub>3</sub>) δ 7.34 (t, *J* = 7.9 Hz, 2H), 7.28 (d, *J* = 8.4 Hz, 2H), 7.19 – 7.16 (m, 4H), 7.11 (t, *J* = 7.4 Hz, 1H), 7.02 (d, *J* = 8.0 Hz, 2H), 6.96 (d, *J* = 8.5 Hz, 2H), 4.13 (q, *J* = 7.2 Hz, 1H), 1.64 (d, *J* = 7.2 Hz, 3H).

**<sup>13</sup>C NMR** (126 MHz, CDCl<sub>3</sub>) δ 157.5, 155.6, 145.0, 140.8, 131.9, 129.8, 129.1, 128.9, 128.6, 123.3, 119.0, 118.9, 43.7, 22.1.

**IR** (film): ν (cm<sup>-1</sup>) 3081, 3072, 3042, 3019, 1861, 1788, 1584, 1532, 1446, 1377, 1187, 1120, 1044, 1024, 1014, 935, 921, 702, 523, 469.

**HRMS** (ESI-TOF, *m/z*) calculated for C<sub>20</sub>H<sub>18</sub>ClO<sup>+</sup> [M+H]<sup>+</sup> 309.1041, found 309.1038.

### 1-bromo-4-(1-(4-phenoxyphenyl)ethyl)benzene (**48**)

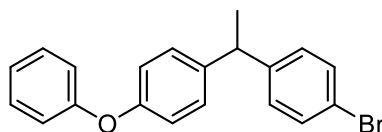

A Schlenk tube (10 mL) was charged with diphenyl ether (**1d**, 51.1 mg, 0.30 mmol), 4-bromoethylbenzene (**2f**, 166.6 mg, 0.90 mmol),  $\text{FeCl}_3 \cdot 6\text{H}_2\text{O}$  (16.2 mg, 0.060 mmol) and DCE (0.75 mL). The mixture was degassed *via* three freeze-pump-thaw cycles, then filled with dry air. The Schlenk tube was positioned approximately 5 cm away from a 50 W LED lamp ( $\lambda_{\text{max}} = 410$  nm). After being stirred at 25 °C for 48 h, the reaction mixture was concentrated to dryness. Purification using silica gel column chromatography (elution with PE:DCM = 5:1) gave the pure product **48** as a colorless oil (73.9 mg, 0.210 mmol, 70% yield).

**$^1\text{H}$  NMR** (500 MHz,  $\text{CDCl}_3$ )  $\delta$  7.41 – 7.38 (m, 2H), 7.30 (m, 2H), 7.15 – 7.12 (m, 2H), 7.10 – 7.07 (m, 3H), 7.01 – 6.97 (m, 2H), 6.94 – 6.91 (m, 2H), 4.08 (q,  $J = 7.2$  Hz, 1H), 1.60 (d,  $J = 7.2$  Hz, 3H).

**$^{13}\text{C}$  NMR** (126 MHz,  $\text{CDCl}_3$ )  $\delta$  157.4, 155.6, 145.5, 140.7, 131.6, 129.8, 129.5, 128.8, 123.2, 120.0, 119.0, 118.9, 43.7, 22.0.

**IR** (film):  $\nu$  ( $\text{cm}^{-1}$ ) 3079, 3065, 3044, 3003, 1956, 1862, 1790, 1330, 1247, 1002, 866, 830, 683, 672, 544, 457.

**HRMS** (ESI-TOF,  $m/z$ ) calculated for  $\text{C}_{20}\text{H}_{18}\text{BrO}^+$   $[\text{M}+\text{H}]^+$  353.0536, found 353.0542.

### 1-bromo-3-(1-(4-phenoxyphenyl)ethyl)benzene (**49**)

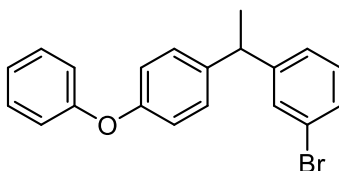

A Schlenk tube (10 mL) was charged with diphenyl ether (**1d**, 51.1 mg, 0.30 mmol), 1-bromo-3-ethylbenzene (**2g**, 166.6 mg, 0.90 mmol),  $\text{FeCl}_3 \cdot 6\text{H}_2\text{O}$  (16.2 mg, 0.060 mmol) and DCE (0.75 mL). The mixture was degassed *via* three freeze-pump-thaw cycles, then filled with dry air. The Schlenk tube was positioned approximately 5 cm away from a 50 W LED lamp ( $\lambda_{\text{max}} = 410$  nm). After being stirred at 25 °C for 48 h, the reaction mixture was concentrated to dryness. Purification using silica gel column chromatography (elution with PE:DCM = 5:1) gave the pure product **49** as a white solid (76.0 mg, 0.216 mmol, 72% yield).

**$^1\text{H}$  NMR** (500 MHz,  $\text{CDCl}_3$ )  $\delta$  7.38 – 7.30 (m, 4H), 7.16 (d,  $J = 7.9$  Hz, 4H), 7.09 (t,  $J = 7.4$  Hz, 1H), 7.03 – 6.98 (m, 2H), 6.96 – 6.92 (m, 2H), 4.10 (q,  $J = 7.2$  Hz, 1H), 1.62 (d,  $J = 7.2$  Hz, 3H).

**<sup>13</sup>C NMR** (126 MHz, CDCl<sub>3</sub>) δ 157.4, 155.7, 149.0, 140.5, 130.8, 130.1, 129.8, 129.4, 128.9, 126.4, 123.3, 122.7, 119.0, 118.9, 44.0, 22.0.

**IR** (film): ν (cm<sup>-1</sup>) 3068, 3042, 3016, 2001, 1989, 1885, 1401, 1332, 1250, 980, 812, 695, 688, 651, 504, 403.

**HRMS** (ESI-TOF, m/z) calculated for C<sub>20</sub>H<sub>18</sub>BrO<sup>+</sup> [M+H]<sup>+</sup> 353.0536, found 353.0539.

#### 1-iodo-4-(1-(4-phenoxyphenyl)ethyl)benzene (**50**)

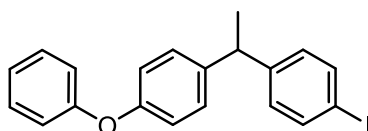

A Schlenk tube (10 mL) was charged with diphenyl ether (**1d**, 51.1 mg, 0.30 mmol), 1-ethyl-4-iodobenzene (**2h**, 208.9 mg, 0.90 mmol), FeCl<sub>3</sub>·6H<sub>2</sub>O (16.2 mg, 0.060 mmol) and DCE (0.75 mL). The mixture was degassed *via* three freeze-pump-thaw cycles, then filled with dry air. The Schlenk tube was positioned approximately 5 cm away from a 50 W LED lamp (λ<sub>max</sub> = 410 nm). After being stirred at 25 °C for 48 h, the reaction mixture was concentrated to dryness. Purification using silica gel column chromatography (elution with PE:DCM = 5:1) gave the pure product **50** as a yellow solid (72.0 mg, 0.180 mmol, 60% yield).

**<sup>1</sup>H NMR** (500 MHz, CDCl<sub>3</sub>) δ 7.61 (d, *J* = 8.2 Hz, 2H), 7.33 (t, *J* = 7.8 Hz, 2H), 7.15 (d, *J* = 8.5 Hz, 2H), 7.09 (t, *J* = 7.3 Hz, 1H), 6.99 (t, *J* = 8.5 Hz, 4H), 6.94 (d, *J* = 8.4 Hz, 2H), 4.09 (q, *J* = 7.2 Hz, 1H), 1.61 (d, *J* = 7.2 Hz, 3H).

**<sup>13</sup>C NMR** (126 MHz, CDCl<sub>3</sub>) δ 157.5, 155.7, 146.3, 140.7, 137.6, 129.8, 128.9, 123.3, 119.0, 118.9, 91.4, 43.8, 22.0.

**IR** (film): ν (cm<sup>-1</sup>) 3477, 3461, 3113, 3059, 2993, 1943, 1883, 1571, 1300, 1188, 1167, 1058, 1015, 996, 903, 835, 667, 614, 460.

**HRMS** (ESI-TOF, m/z) calculated for C<sub>20</sub>H<sub>18</sub>IO<sup>+</sup> [M+H]<sup>+</sup> 401.0397, found 401.0341.

#### 1-methoxy-4-(1-(4-phenoxyphenyl)ethyl)benzene (**51**)

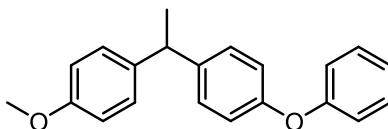

A Schlenk tube (10 mL) was charged with anisole (**1a**, 32.4 mg, 0.30 mmol), 1-ethyl-4-phenoxybenzene (**2i**, 178.3 mg, 0.90 mmol), FeCl<sub>3</sub>·6H<sub>2</sub>O (16.2 mg, 0.060 mmol) and DCE (0.75 mL). The mixture was degassed *via* three freeze-pump-thaw cycles, then filled with dry air. The Schlenk tube was positioned approximately 5 cm away from a 50 W LED lamp (λ<sub>max</sub> = 410 nm). After being stirred at 25 °C for 48 h, the reaction mixture was concentrated to

dryness. Purification using silica gel column chromatography (elution with PE:DCM = 6:1) gave the pure product **51** as a colorless oil (50.2 mg, 0.165 mmol, 55% yield).

**<sup>1</sup>H NMR** (500 MHz, CDCl<sub>3</sub>) δ 7.36 – 7.29 (m, 2H), 7.19 – 7.14 (m, 4H), 7.08 (t, *J* = 7.4 Hz, 1H), 7.03 – 6.96 (m, 2H), 6.93 (d, *J* = 8.6 Hz, 2H), 6.85 (d, *J* = 8.7 Hz, 2H), 4.10 (q, *J* = 7.2 Hz, 1H), 3.79 (s, 3H), 1.62 (d, *J* = 7.2 Hz, 3H).

**<sup>13</sup>C NMR** (126 MHz, CDCl<sub>3</sub>) δ 158.0, 157.7, 155.4, 141.9, 138.75, 129.8, 128.9, 128.6, 123.13, 119.0, 118.8, 113.9, 55.4, 43.5, 22.4.

**IR** (film): *ν* (cm<sup>-1</sup>) 3071, 3066, 3003, 2959, 2944, 2803, 1671, 1450, 1411, 1253, 1107, 1015, 882, 656, 556, 436.

**HRMS** (ESI-TOF, *m/z*) calculated for C<sub>21</sub>H<sub>21</sub>O<sub>2</sub><sup>+</sup> [*M*+*H*]<sup>+</sup> 305.1536, found 305.1541.

### 1-phenoxy-4-(1-phenylpropyl)benzene (**52**)

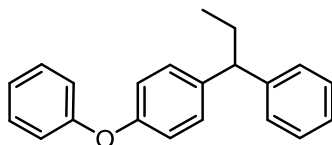

A Schlenk tube (10 mL) was charged with diphenyl ether (**1d**, 51.1 mg, 0.30 mmol), propylbenzene (**2j**, 108.2 mg, 0.90 mmol), FeCl<sub>3</sub>·6H<sub>2</sub>O (16.2 mg, 0.060 mmol) and (CHCl<sub>2</sub>)<sub>2</sub> (0.75 mL). The mixture was degassed *via* three freeze-pump-thaw cycles, then filled with dry air. The Schlenk tube was positioned approximately 5 cm away from a 50 W LED lamp (*λ*<sub>max</sub> = 410 nm). After being stirred at 25 °C for 48 h, the reaction mixture was concentrated to dryness. Purification using silica gel column chromatography (elution with PE:DCM = 5:1) gave the pure product **52** as a colorless oil (61.4 mg, 0.213 mmol, 71% yield).

**<sup>1</sup>H NMR** (500 MHz, CDCl<sub>3</sub>) δ 7.33 – 7.25 (m, 4H), 7.24 – 7.21 (m, 2H), 7.20 – 7.16 (m, 3H), 7.13 – 6.85 (m, 5H), 3.77 (t, *J* = 7.8 Hz, 1H), 2.07 – 2.03 (m, 2H), 0.90 (t, *J* = 7.3 Hz, 3H).

**<sup>13</sup>C NMR** (126 MHz, CDCl<sub>3</sub>) δ 157.6, 155.4, 145.3, 140.3, 129.8, 129.2, 128.5, 128.0, 126.2, 123.1, 119.0, 118.8, 52.7, 28.9, 12.9.

**IR** (film): *ν* (cm<sup>-1</sup>) 3108, 3066, 3028, 2978, 2898, 1583, 1445, 1341, 1178, 1111, 1083, 909, 619, 592, 585, 481.

**HRMS** (ESI-TOF, *m/z*) calculated for C<sub>21</sub>H<sub>21</sub>O<sup>+</sup> [*M*+*H*]<sup>+</sup> 289.1587, found 289.1585.

### 1-phenoxy-4-(1-phenylbutyl)benzene (**53**)

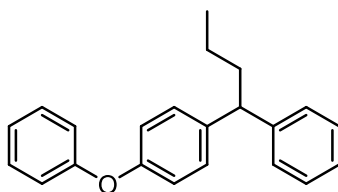

A Schlenk tube (10 mL) was charged with diphenyl ether (**1d**, 51.1 mg, 0.30 mmol), butylbenzene (**2k**, 120.8 mg, 0.90 mmol),  $\text{FeCl}_3 \cdot 6\text{H}_2\text{O}$  (16.2 mg, 0.060 mmol) and  $(\text{CHCl}_2)_2$  (0.75 mL). The mixture was degassed *via* three freeze-pump-thaw cycles, then filled with dry air. The Schlenk tube was positioned approximately 5 cm away from a 50 W LED lamp ( $\lambda_{\text{max}} = 410$  nm). After being stirred at 25 °C for 48 h, the reaction mixture was concentrated to dryness. Purification using silica gel column chromatography (elution with PE:DCM = 5:1) gave the pure product **53** as a white solid (63.4 mg, 0.210 mmol, 70% yield).

**$^1\text{H}$  NMR** (500 MHz,  $\text{CDCl}_3$ )  $\delta$  7.31 – 7.26 (m, 4H), 7.23 (d,  $J = 7.2$  Hz, 2H), 7.20 – 7.16 (m, 3H), 7.06 (t,  $J = 7.4$  Hz, 1H), 6.94 (m, 4H), 3.89 (t,  $J = 7.8$  Hz, 1H), 2.00 (d,  $J = 7.7$  Hz, 2H), 1.30 – 1.27 (m, 2H), 0.92 (t,  $J = 7.3$  Hz, 3H).

**$^{13}\text{C}$  NMR** (126 MHz,  $\text{CDCl}_3$ )  $\delta$  157.6, 155.4, 145.5, 140.5, 129.8, 129.2, 128.5, 128.0, 126.2, 123.1, 119.0, 118.8, 50.5, 38.2, 21.3, 14.2.

**IR** (film):  $\nu$  ( $\text{cm}^{-1}$ ) 3108, 3087, 3029, 3003, 2873, 2860, 1953, 1800, 1604, 1583, 1489, 1379, 1364, 1188, 1132, 955, 934, 779, 746, 661, 570, 503.

**HRMS** (ESI-TOF,  $m/z$ ) calculated for  $\text{C}_{22}\text{H}_{23}\text{O}^+$   $[\text{M}+\text{H}]^+$  303.1743, found 303.1749.

### 4-(1-(4-phenoxyphenyl)butyl)-1,1'-biphenyl (**54**)

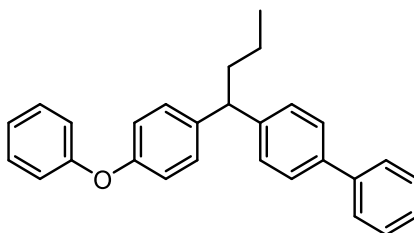

A Schlenk tube (10 mL) was charged with diphenyl ether (**1d**, 51.1 mg, 0.30 mmol), 4-butyl-1,1'-biphenyl (**2l**, 189.3 mg, 0.90 mmol),  $\text{FeCl}_3 \cdot 6\text{H}_2\text{O}$  (16.2 mg, 0.060 mmol) and  $(\text{CHCl}_2)_2$  (0.75 mL). The mixture was degassed *via* three freeze-pump-thaw cycles, then filled with dry air. The Schlenk tube was positioned approximately 5 cm away from a 50 W LED lamp ( $\lambda_{\text{max}} = 410$  nm). After being stirred at 25 °C for 48 h, the reaction mixture was concentrated to dryness. Purification using silica gel column chromatography (elution with PE:DCM = 5:1) gave the pure product **54** as a colorless oil (73.7 mg, 0.195 mmol, 65% yield).

**$^1\text{H}$  NMR** (500 MHz,  $\text{CDCl}_3$ )  $\delta$  7.57 – 7.54 (m, 2H), 7.50 (d,  $J = 8.2$  Hz, 2H), 7.39 (t,  $J = 7.7$  Hz, 2H), 7.29 (m, 5H), 7.21 (d,  $J = 8.7$  Hz, 2H), 7.05 (t,  $J = 7.4$  Hz, 1H), 7.00 – 6.96 (m, 2H),

6.93 (d,  $J = 8.6$  Hz, 2H), 3.92 (t,  $J = 7.8$  Hz, 1H), 2.06 – 2.00 (m, 2H), 1.34 – 1.29 (m, 2H), 0.94 (t,  $J = 7.3$  Hz, 3H).

**$^{13}\text{C}$  NMR** (126 MHz,  $\text{CDCl}_3$ )  $\delta$  157.5, 155.5, 144.6, 141.1, 140.3, 139.1, 129.8, 129.2, 128.8, 128.3, 127.3, 127.2, 127.1, 123.2, 119.0, 118.9, 50.2, 38.2, 21.3, 14.2.

**IR** (film):  $\nu$  ( $\text{cm}^{-1}$ ) 3091, 3065, 3030, 2888, 2812, 1942, 1838, 1593, 1558, 1454, 1342, 1009, 1130, 935, 759, 733, 694, 510.

**HRMS** (ESI-TOF,  $m/z$ ) calculated for  $\text{C}_{28}\text{H}_{27}\text{O}^+$   $[\text{M}+\text{H}]^+$  379.2056, found 379.2062.

### 1-(2-methyl-1-phenylpropyl)-4-phenoxybenzene (**55**)

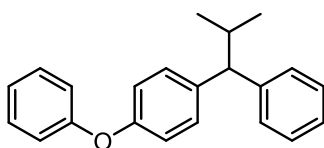

A Schlenk tube (10 mL) was charged with diphenyl ether (**1d**, 51.1 mg, 0.30 mmol), isobutylbenzene (**2m**, 120.8 mg, 0.90 mmol),  $\text{FeCl}_3 \cdot 6\text{H}_2\text{O}$  (16.2 mg, 0.060 mmol) and DCE (0.75 mL). The mixture was degassed *via* three freeze-pump-thaw cycles, then filled with dry air. The Schlenk tube was positioned approximately 5 cm away from a 50 W LED lamp ( $\lambda_{\text{max}} = 410$  nm). After being stirred at 25 °C for 48 h, the reaction mixture was concentrated to dryness. Purification using silica gel column chromatography (elution with PE:DCM = 5:1) gave the pure product **55** as a white solid (59.8 mg, 0.198 mmol, 66% yield).

**$^1\text{H}$  NMR** (500 MHz,  $\text{CDCl}_3$ )  $\delta$  7.29 (m, 2H), 7.27 (s, 2H), 7.26 (d,  $J = 4.0$  Hz, 2H), 7.24 – 7.22 (m, 2H), 7.14 (m, 1H), 7.07 – 7.03 (m, 1H), 6.97 – 6.94 (m, 2H), 6.91 – 6.88 (m, 2H), 3.38 (d,  $J = 10.8$  Hz, 1H), 2.44 (m, 1H), 0.89 (d,  $J = 6.5$  Hz, 3H), 0.87 (d,  $J = 6.5$  Hz, 3H).

**$^{13}\text{C}$  NMR** (126 MHz,  $\text{CDCl}_3$ )  $\delta$  157.6, 155.3, 145.1, 140.1, 129.8, 129.3, 128.6, 128.1, 126.1, 123.1, 119.0, 118.8, 60.3, 32.2, 22.0, 22.0.

**IR** (film):  $\nu$  ( $\text{cm}^{-1}$ ) 3086, 3065, 3028, 2924, 2849, 1665, 1375, 1324, 1178, 1168, 1122, 1058, 933, 922, 784, 737, 618, 591, 481.

**HRMS** (ESI-TOF,  $m/z$ ) calculated for  $\text{C}_{22}\text{H}_{23}\text{O}^+$   $[\text{M}+\text{H}]^+$  303.1743, found 303.1726.

### ((4-phenoxyphenyl)methylene)dibenzene (**56**)

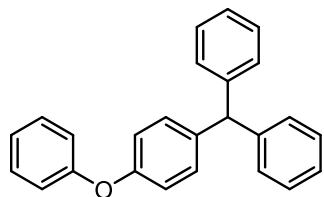

A Schlenk tube (10 mL) was charged with diphenyl ether (**1d**, 51.1 mg, 0.30 mmol), diphenylmethanol (**2n**, 151.4 mg, 0.90 mmol),  $\text{FeCl}_3 \cdot 6\text{H}_2\text{O}$  (16.2 mg, 0.060 mmol) and

(CHCl<sub>2</sub>)<sub>2</sub> (0.75 mL). The mixture was degassed *via* three freeze-pump-thaw cycles, then filled with dry air. The Schlenk tube was positioned approximately 5 cm away from a 50 W LED lamp ( $\lambda_{\text{max}}$  = 410 nm). After being stirred at 25 °C for 48 h, the reaction mixture was concentrated to dryness. Purification using silica gel column chromatography (elution with PE:DCM = 5:1) gave the pure product **56** as a white solid (72.6 mg, 0.216 mmol, 72% yield).

**<sup>1</sup>H NMR** (500 MHz, CDCl<sub>3</sub>)  $\delta$  7.35 – 7.31 (m, 3H), 7.30 (d,  $J$  = 7.7 Hz, 3H), 7.23 (t,  $J$  = 7.3 Hz, 2H), 7.14 (d,  $J$  = 7.2 Hz, 4H), 7.11 – 7.06 (m, 3H), 7.04 – 7.00 (m, 2H), 6.96 – 6.92 (m, 2H), 5.55 (s, 1H).

**<sup>13</sup>C NMR** (126 MHz, CDCl<sub>3</sub>)  $\delta$  157.4, 155.8, 144.1, 138.9, 130.8, 129.8, 129.5, 128.5, 126.5, 123.3, 119.00, 118.8, 56.3.

**IR** (film):  $\nu$  (cm<sup>-1</sup>) 3088, 3066, 3006, 2913, 1959, 1943, 1600, 1547, 1498, 1453, 1337, 1326, 1202, 1183, 1108, 1031, 1003, 933, 890, 632, 608, 464.

**HRMS** (ESI-TOF,  $m/z$ ) calculated for C<sub>25</sub>H<sub>21</sub>O<sup>+</sup> [M+H]<sup>+</sup> 337.1592, found 337.1599.

#### (1-(4-phenoxyphenyl)ethane-1,2-diyl)dibenzene (**57**)

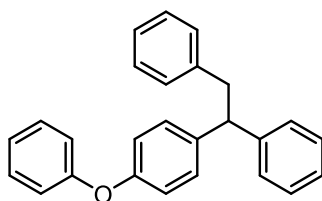

A Schlenk tube (10 mL) was charged with diphenyl ether (**1d**, 51.1 mg, 0.30 mmol), 1,2-diphenylethane (**2o**, 164.0 mg, 0.90 mmol), FeCl<sub>3</sub>·6H<sub>2</sub>O (16.2 mg, 0.060 mmol) and DCE (0.75 mL). The mixture was degassed *via* three freeze-pump-thaw cycles, then filled with dry air. The Schlenk tube was positioned approximately 5 cm away from a 50 W LED lamp ( $\lambda_{\text{max}}$  = 410 nm). After being stirred at 25 °C for 48 h, the reaction mixture was concentrated to dryness. Purification using silica gel column chromatography (elution with PE:DCM = 5:1) gave the pure product **57** as a white solid (69.3 mg, 0.198 mmol, 66% yield).

**<sup>1</sup>H NMR** (500 MHz, CDCl<sub>3</sub>)  $\delta$  7.28 – 7.18 (m, 6H), 7.15 – 7.09 (m, 6H), 7.03 (t,  $J$  = 7.4 Hz, 1H), 7.00 – 6.92 (m, 4H), 6.87 (d,  $J$  = 8.6 Hz, 2H), 4.19 (t,  $J$  = 7.8 Hz, 1H), 3.32 (m, 2H).

**<sup>13</sup>C NMR** (126 MHz, CDCl<sub>3</sub>)  $\delta$  157.5, 155.5, 144.6, 140.3, 139.6, 129.8, 129.4, 129.2, 128.5, 128.2, 128.1, 126.4, 126.0, 123.1, 119.0, 118.8, 52.6, 42.4.

**IR** (film):  $\nu$  (cm<sup>-1</sup>) 3120, 3083, 3058, 3027, 2943, 2918, 1953, 1946, 1751, 1146, 1065, 1003, 982, 959, 910, 841, 768, 752, 622, 528, 510.

**HRMS** (ESI-TOF,  $m/z$ ) calculated for C<sub>26</sub>H<sub>23</sub>O<sup>+</sup> [M+H]<sup>+</sup> 351.1743, found 351.1752.

### 1-(3-chloro-1-phenylpropyl)-4-phenoxybenzene (**58**)

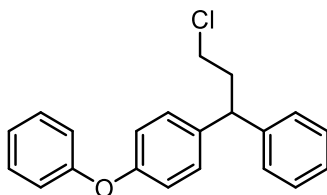

A Schlenk tube (10 mL) was charged diphenyl ether (**1d**, 51.1 mg, 0.30 mmol), (3-chloropropyl)benzene (**2p**, 139.2 mg, 0.90 mmol),  $\text{FeCl}_3 \cdot 6\text{H}_2\text{O}$  (16.2 mg, 0.060 mmol) and DCE (0.75 mL). The mixture was degassed *via* three freeze-pump-thaw cycles, then filled with dry air. The Schlenk tube was positioned approximately 5 cm away from a 50 W LED lamp ( $\lambda_{\text{max}} = 410$  nm). After being stirred at 25 °C for 48 h, the reaction mixture was concentrated to dryness. Purification using silica gel column chromatography (elution with PE:DCM = 4:1) gave the pure product **58** as a light yellow oil (57.0 mg, 0.177 mmol, 59% yield).

**$^1\text{H}$  NMR** (500 MHz,  $\text{CDCl}_3$ )  $\delta$  7.33 – 7.28 (m, 4H), 7.24 (d,  $J = 8.2$  Hz, 2H), 7.21 (dd,  $J = 11.8$ , 4.9 Hz, 3H), 7.08 (t,  $J = 7.4$  Hz, 1H), 7.00 – 6.96 (m, 2H), 6.95 – 6.91 (m, 2H), 4.20 (t,  $J = 7.8$  Hz, 1H), 3.45 (t,  $J = 6.6$  Hz, 2H), 2.47 (q,  $J = 5.0$  Hz, 2H).

**$^{13}\text{C}$  NMR** (126 MHz,  $\text{CDCl}_3$ )  $\delta$  157.3, 155.9, 143.7, 138.5, 129.8, 129.2, 128.8, 128.0, 126.7, 123.3, 119.1, 119.0, 47.3, 43.3, 38.4.

**IR** (film):  $\nu$  ( $\text{cm}^{-1}$ ) 3108, 3086, 3064, 2942, 2851, 1688, 1606, 1583, 1480, 1443, 1432, 1355, 1290, 1230, 1204, 1180, 1080, 1033, 914, 864, 745, 700, 658, 562.

**HRMS** (ESI-TOF,  $m/z$ ) calculated for  $\text{C}_{21}\text{H}_{20}\text{ClO}^+ [\text{M}+\text{H}]^+$  323.1197, found 323.1201.

### 1-(3-bromo-1-phenylpropyl)-4-phenoxybenzene (**59**)

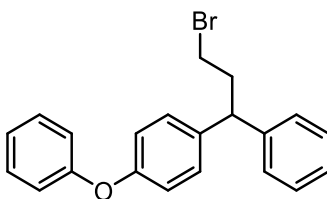

A Schlenk tube (10 mL) was charged diphenyl ether (**1d**, 51.1 mg, 0.30 mmol), (3-bromopropyl)benzene (**2q**, 179.2 mg, 0.90 mmol),  $\text{FeCl}_3 \cdot 6\text{H}_2\text{O}$  (16.2 mg, 0.060 mmol) and DCE (0.75 mL). The mixture was degassed *via* three freeze-pump-thaw cycles, then filled with dry air. The Schlenk tube was positioned approximately 5 cm away from a 50 W LED lamp ( $\lambda_{\text{max}} = 410$  nm). After being stirred at 25 °C for 48 h, the reaction mixture was concentrated to dryness. Purification using silica gel column chromatography (elution with PE:DCM = 4:1) gave the pure product **59** as a light yellow oil (56.0 mg, 0.153 mmol, 51% yield).

**$^1\text{H}$  NMR** (500 MHz,  $\text{CDCl}_3$ )  $\delta$  7.33 – 7.29 (m, 4H), 7.25 (d,  $J = 6.4$  Hz, 2H), 7.20 (t,  $J = 8.3$  Hz, 3H), 7.10 – 7.06 (m, 1H), 7.00 – 6.91 (m, 4H), 4.18 (t,  $J = 7.7$  Hz, 1H), 3.32 (t,  $J = 6.7$  Hz, 2H), 2.55 (dd,  $J = 14.3$ , 6.9 Hz, 2H).

**<sup>13</sup>C NMR** (126 MHz, CDCl<sub>3</sub>) δ 157.3, 155.9, 143.6, 138.4, 129.9, 129.2, 128.8, 128.0, 126.7, 123.4, 119.1, 119.0, 48.6, 38.6, 32.1.

**IR** (film): ν (cm<sup>-1</sup>) 3077, 3063, 3004, 2939, 2858, 1616, 1580, 1453, 1428, 1365, 1333, 1244, 1208, 1180, 1062, 1031, 910, 822, 745, 659, 651, 481.

**MS** (ESI) mass calculated for C<sub>21</sub>H<sub>20</sub>BrO<sup>+</sup> [M+H]<sup>+</sup> 367.0716, found 367.0717.

### 1-(4-phenoxyphenyl)-2,3-dihydro-1*H*-indene (**60**)

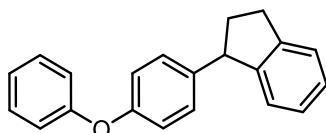

A Schlenk tube (10 mL) was charged diphenyl ether (**1d**, 51.1 mg, 0.30 mmol), indan (**2r**, 106.4 mg, 0.90 mmol), FeCl<sub>3</sub>·6H<sub>2</sub>O (16.2 mg, 0.060 mmol) and DCE (0.75 mL). The mixture was degassed *via* three freeze-pump-thaw cycles, then filled with dry air. The Schlenk tube was positioned approximately 5 cm away from a 50 W LED lamp (λ<sub>max</sub> = 410 nm). After being stirred at 25 °C for 48 h, the reaction mixture was concentrated to dryness. Purification using silica gel column chromatography (elution with PE:DCM = 5:1) gave the pure product **60** as a colorless oil (42.9 mg, 0.150 mmol, 50% yield).

**<sup>1</sup>H NMR** (500 MHz, CDCl<sub>3</sub>) δ 7.42 – 7.27 (m, 3H), 7.23 (t, *J* = 7.3 Hz, 1H), 7.20 – 7.16 (m, 3H), 7.12 (t, *J* = 7.4 Hz, 1H), 7.12 – 6.91 (m, 5H), 4.36 (t, *J* = 8.3 Hz, 1H), 3.08 (m, 1H), 3.02 – 2.95 (m, 1H), 2.62 (m, 1H), 2.11 – 2.05 (m, 1H).

**<sup>13</sup>C NMR** (126 MHz, CDCl<sub>3</sub>) δ 157.6, 155.7, 147.0, 144.4, 140.5, 129.8, 129.4, 126.7, 126.5, 125.0, 124.5, 123.2, 119.1, 118.8, 51.1, 36.8, 31.9.

**IR** (film): ν (cm<sup>-1</sup>) 3363, 2922, 2849, 1588, 1488, 1408, 1237, 1166, 1022, 867, 751, 691, 535.

**HRMS** (ESI-TOF, *m/z*) calculated for C<sub>21</sub>H<sub>19</sub>O<sup>+</sup> [M+H]<sup>+</sup> 287.1430, found 287.1438.

### 1-(4-methoxyphenyl)-2,3-dihydro-1*H*-indene (**61**)

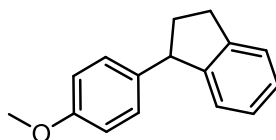

A Schlenk tube (10 mL) was charged with anisole (**1a**, 32.4 mg, 0.30 mmol), indan (**2r**, 106.4 mg, 0.90 mmol), FeCl<sub>3</sub>·6H<sub>2</sub>O (16.2 mg, 0.060 mmol) and DCE (0.75 mL). The mixture was degassed *via* three freeze-pump-thaw cycles, then filled with dry air. The Schlenk tube was positioned approximately 5 cm away from a 50 W LED lamp (λ<sub>max</sub> = 410 nm). After being stirred at 25 °C for 48 h, the reaction mixture was concentrated to dryness. Purification using silica gel column chromatography (elution with PE:DCM = 5:1) gave the pure product **61** as a

colorless oil (34.3 mg, 0.153 mmol, 51% yield).

**<sup>1</sup>H NMR** (500 MHz, CDCl<sub>3</sub>) δ 7.31 (d, *J* = 7.4 Hz, 1H), 7.22 – 7.19 (m, 1H), 7.16 (d, *J* = 7.5 Hz, 1H), 7.15 – 7.13 (m, 2H), 6.98 (d, *J* = 7.5 Hz, 1H), 6.90 – 6.87 (m, 2H), 4.32 (t, *J* = 8.3 Hz, 1H), 3.82 (s, 3H), 3.09 – 3.03 (m, 1H), 2.99 – 2.94 (m, 1H), 2.61 – 2.55 (m, 1H), 2.08 – 2.02 (m, 1H).

**<sup>13</sup>C NMR** (126 MHz, CDCl<sub>3</sub>) δ 158.2, 147.3, 144.4, 137.6, 129.2, 126.6, 126.4, 125.0, 124.4, 114.0, 55.4, 51.0, 36.9, 31.9.

**IR** (film): ν (cm<sup>-1</sup>) 3371, 2920, 2857, 1578, 1473, 1410, 1178, 1013, 865, 741, 676, 551.

**MS** (ESI) mass calculated for C<sub>16</sub>H<sub>17</sub>O<sup>+</sup> [M+H]<sup>+</sup> 225.1274, found 225.1278.

### 1-(4-phenoxyphenyl)-1,2,3,4-tetrahydronaphthalene (**62**)

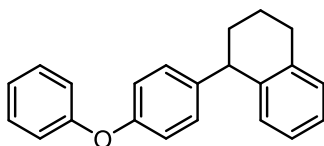

A Schlenk tube (10 mL) was charged diphenyl ether (**1d**, 51.1 mg, 0.30 mmol), 1,2,3,4-tetrahydronaphthalene (**2s**, 119.0 mg, 0.90 mmol), FeCl<sub>3</sub>·6H<sub>2</sub>O (16.2 mg, 0.060 mmol) and DCE (0.75 mL). The mixture was degassed *via* three freeze-pump-thaw cycles, then filled with dry air. The Schlenk tube was positioned approximately 5 cm away from a 50 W LED lamp (λ<sub>max</sub> = 410 nm). After being stirred at 25 °C for 48 h, the reaction mixture was concentrated to dryness. Purification using silica gel column chromatography (elution with PE:DCM = 5:1) gave the pure product **62** as a white solid (47.7 mg, 0.159 mmol, 53% yield).

**<sup>1</sup>H NMR** (500 MHz, CDCl<sub>3</sub>) δ 7.36 (t, *J* = 7.8 Hz, 2H), 7.17 (d, *J* = 5.5 Hz, 2H), 7.09 (m, 6H), 6.97 (d, *J* = 8.4 Hz, 2H), 6.92 (d, *J* = 7.6 Hz, 1H), 4.15 (t, *J* = 6.6 Hz, 1H), 2.96 – 2.92 (m, 1H), 2.89 (q, *J* = 5.2, 4.5 Hz, 1H), 2.23 – 2.18 (m, 1H), 1.95 – 1.89 (m, 2H), 1.84 – 1.79 (m, 1H).

**<sup>13</sup>C NMR** (126 MHz, CDCl<sub>3</sub>) δ 157.6, 155.4, 142.6, 139.5, 137.7, 130.3, 130.1, 129.8, 129.1, 126.1, 125.8, 123.1, 118.9, 118.8, 45.0, 33.4, 29.9, 21.0.

**IR** (film): ν (cm<sup>-1</sup>) 3363, 2938, 2852, 2841, 1505, 1482, 1455, 1408, 1301, 1223, 1160, 1022, 751, 739, 691, 541.

**HRMS** (ESI-TOF, *m/z*) calculated for C<sub>22</sub>H<sub>21</sub>O<sup>+</sup> [M+H]<sup>+</sup> 301.1587, found 301.1581.

### 1-(1-(4-phenoxyphenyl)ethyl)naphthalene (**63**)

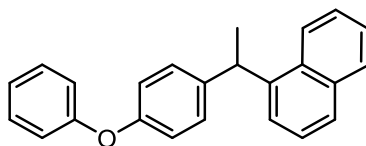

A Schlenk tube (10 mL) was charged with diphenyl ether (**1d**, 51.1 mg, 0.30 mmol), 1-ethylnaphthalene (**2t**, 140.6 mg, 0.90 mmol),  $\text{FeCl}_3 \cdot 6\text{H}_2\text{O}$  (16.2 mg, 0.060 mmol) and  $(\text{CHCl}_2)_2$  (0.75 mL). The mixture was degassed *via* three freeze-pump-thaw cycles, then filled with dry air. The Schlenk tube was positioned approximately 5 cm away from a 50 W LED lamp ( $\lambda_{\text{max}} = 410$  nm). After being stirred at 25 °C for 48 h, the reaction mixture was concentrated to dryness. Purification using silica gel column chromatography (elution with PE:DCM = 5:1) gave the pure product **63** as a white solid (63.2 mg, 0.195 mmol, 65% yield).

**$^1\text{H}$  NMR** (500 MHz,  $\text{CDCl}_3$ )  $\delta$  8.08 – 8.05 (m, 1H), 7.88 – 7.85 (m, 1H), 7.76 (d,  $J = 7.9$  Hz, 1H), 7.49 – 7.44 (m, 4H), 7.31 (t,  $J = 7.3$  Hz, 2H), 7.20 (d,  $J = 8.1$  Hz, 2H), 7.08 (t,  $J = 7.4$  Hz, 1H), 6.99 (d,  $J = 8.4$  Hz, 2H), 6.94 – 6.90 (m, 2H), 4.93 (q,  $J = 7.0$  Hz, 1H), 1.78 (d,  $J = 7.1$  Hz, 3H).

**$^{13}\text{C}$  NMR** (126 MHz,  $\text{CDCl}_3$ )  $\delta$  157.5, 155.4, 141.7, 141.7, 134.2, 131.8, 129.8, 129.0, 127.2, 126.0, 125.6, 125.5, 124.4, 124.1, 123.2, 119.0, 118.8, 40.0, 22.8.

**IR** (film):  $\nu$  ( $\text{cm}^{-1}$ ) 3502, 3054, 3027, 2965, 2919, 2849, 1662, 1485, 1392, 1181, 841, 766, 738, 697, 570.

**HRMS** (ESI-TOF,  $m/z$ ) calculated for  $\text{C}_{24}\text{H}_{21}\text{O}^+$   $[\text{M}+\text{H}]^+$  325.1587, found 325.1592.

### 1-phenoxy-4-(2-phenylpropan-2-yl)benzene (**64**)

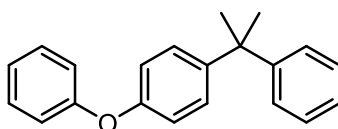

A Schlenk tube (10 mL) was charged with diphenyl ether (**1d**, 51.1 mg, 0.30 mmol), cumene (**2u**, 108.2 mg, 0.90 mmol),  $\text{FeCl}_3 \cdot 6\text{H}_2\text{O}$  (16.2 mg, 0.060 mmol) and DCE (0.75 mL). The mixture was degassed *via* three freeze-pump-thaw cycles, then filled with dry air. The Schlenk tube was positioned approximately 5 cm away from a 50 W LED lamp ( $\lambda_{\text{max}} = 410$  nm). After being stirred at 25 °C for 48 h, the reaction mixture was concentrated to dryness. Purification using silica gel column chromatography (elution with PE:DCM = 5:1) gave the pure product **64** as a white solid (42.3 mg, 0.147 mmol, 49% yield).

**$^1\text{H}$  NMR** (500 MHz,  $\text{CDCl}_3$ )  $\delta$  7.35 – 7.30 (m, 3H), 7.28 (d,  $J = 6.9$  Hz, 3H), 7.19 (d,  $J = 8.6$  Hz, 3H), 7.08 (t,  $J = 7.4$  Hz, 1H), 7.01 (d,  $J = 8.0$  Hz, 2H), 6.93 – 6.89 (m, 2H), 1.69 (s, 6H).

**<sup>13</sup>C NMR** (126 MHz, CDCl<sub>3</sub>) δ 157.5, 155.1, 150.8, 145.8, 129.8, 128.2, 128.2, 126.9, 125.8, 123.2, 118.9, 118.4, 42.7, 31.0.

**IR** (film): ν (cm<sup>-1</sup>) 3085, 3068, 3029, 2927, 2871, 1944, 1867, 1801, 1702, 1632, 1550, 1494, 1466, 1458, 1364, 1323, 1282, 1108, 1050, 931, 906.

**HRMS** (ESI-TOF, m/z) calculated for C<sub>21</sub>H<sub>21</sub>O<sup>+</sup> [M+H]<sup>+</sup> 289.1587, found 289.1595.

#### 4-(2-(4-methoxyphenyl)propan-2-yl)-1,1'-biphenyl (**65**)

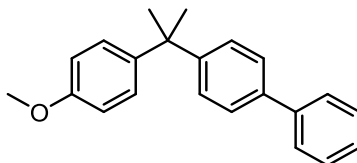

A Schlenk tube (10 mL) was charged with anisole (**1a**, 32.4 mg, 0.30 mmol), 4-isopropylbiphenyl (**2v**, 176.66 mg, 0.90 mmol), FeCl<sub>3</sub>·6H<sub>2</sub>O (16.2 mg, 0.060 mmol) and DCE (0.75 mL). The mixture was degassed *via* three freeze-pump-thaw cycles, then filled with dry air. The Schlenk tube was positioned approximately 5 cm away from a 50 W LED lamp (λ<sub>max</sub> = 410 nm). After being stirred at 25 °C for 48 h, the reaction mixture was concentrated to dryness. Purification using silica gel column chromatography (elution with PE:DCM = 5:1) gave the pure product **65** as a colorless oil (57.1 mg, 0.189 mmol, 63% yield).

**<sup>1</sup>H NMR** (500 MHz, CDCl<sub>3</sub>) δ 7.58 (m, 2H), 7.52 – 7.49 (m, 2H), 7.44 – 7.40 (m, 2H), 7.34 – 7.29 (m, 3H), 7.22 – 7.18 (m, 2H), 6.86 – 6.82 (m, 2H), 3.80 (s, 3H), 1.71 (s, 6H).

**<sup>13</sup>C NMR** (126 MHz, CDCl<sub>3</sub>) δ 157.6, 150.2, 142.9, 141.1, 138.5, 128.8, 128.0, 127.3, 127.2, 127.1, 126.8, 113.5, 55.4, 42.3, 31.1.

**IR** (film): ν (cm<sup>-1</sup>) 3080, 3057, 2915, 2854, 1913, 1833, 1828, 1673, 1537, 1425, 1402, 1485, 1377, 1351, 1288, 1086, 913, 537.

**HRMS** (ESI-TOF, m/z) calculated for C<sub>22</sub>H<sub>23</sub>O<sup>+</sup> [M+H]<sup>+</sup> 303.1743, found 303.1749.

#### 4-([1,1'-biphenyl]-4-ylmethyl)phenol (**66**)

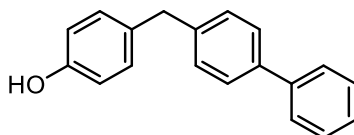

A Schlenk tube (10 mL) was charged with phenol (**1p**, 28.2 mg, 0.30 mmol), 4-methyl-1,1'-biphenyl (**2w**, 151.4 mg, 0.90 mmol), FeCl<sub>3</sub>·6H<sub>2</sub>O (16.2 mg, 0.060 mmol) and CHCl<sub>3</sub> (0.75 mL). The mixture was degassed *via* three freeze-pump-thaw cycles, then filled with dry air. The Schlenk tube was positioned approximately 5 cm away from a 50 W LED lamp (λ<sub>max</sub> = 410 nm). After being stirred at 25 °C for 48 h, the reaction mixture was concentrated to dryness.

Purification using silica gel column chromatography (elution with PE:DCM = 2:1) gave the pure product **66** as a colorless oil (41.4 mg, 0.159 mmol, 53% yield).

**<sup>1</sup>H NMR** (500 MHz, CDCl<sub>3</sub>) δ 7.61 – 7.59 (m, 2H), 7.54 (d, *J* = 8.1 Hz, 2H), 7.45 (t, *J* = 7.7 Hz, 2H), 7.35 (t, *J* = 7.4 Hz, 1H), 7.27 (d, *J* = 8.3 Hz, 2H), 7.12 (d, *J* = 8.4 Hz, 2H), 6.81 (d, *J* = 8.5 Hz, 2H), 3.98 (s, 2H).

**<sup>13</sup>C NMR** (126 MHz, CDCl<sub>3</sub>) δ 154.1, 141.2, 140.8, 139.1, 133.4, 130.2, 129.3, 128.9, 127.3, 127.2, 127.2, 115.5, 40.8.

**IR** (film): ν (cm<sup>-1</sup>) 3382, 3037, 2918, 2849, 1601, 1514, 1248, 1100, 819, 777, 689, 530.

**HRMS** (ESI-TOF, *m/z*) calculated for C<sub>19</sub>H<sub>16</sub>NaO<sup>+</sup> [*M*+Na]<sup>+</sup> 283.1093, found 283.1100.

### 1-(4-phenoxyphenyl)-3-(*p*-tolyl)adamantane (**67**)

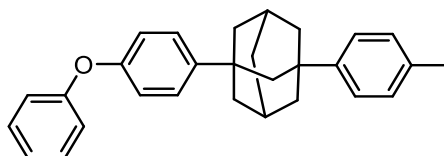

A Schlenk tube (10 mL) was charged with diphenyl ether (**1d**, 51.1 mg, 0.30 mmol), 1-(*p*-tolyl)adamantane (**2x**, 678.5 mg, 3.0 mmol), FeCl<sub>3</sub>·6H<sub>2</sub>O (16.2 mg, 0.060 mmol) and DCE (0.75 mL). The mixture was degassed *via* three freeze-pump-thaw cycles, then filled with dry air. The Schlenk tube was positioned approximately 5 cm away from a 40 W LED lamp (λ<sub>max</sub> = 370 nm). After being stirred at 80 °C for 60 h, the reaction mixture was concentrated to dryness. Purification using silica gel column chromatography (elution with PE) gave the pure product **67** as a colorless oil (61.5 mg, 0.156 mmol, 52% yield).

**<sup>1</sup>H NMR** (500 MHz, CDCl<sub>3</sub>) δ 7.36 (d, *J* = 8.7 Hz, 3H), 7.32 – 7.29 (m, 3H), 7.16 (d, *J* = 8.0 Hz, 2H), 7.09 (t, *J* = 7.4 Hz, 1H), 7.00 (dd, *J* = 17.2, 8.3 Hz, 4H), 2.34 (s, 3H), 2.03 (s, 3H), 1.96 (d, *J* = 2.2 Hz, 10H), 1.80 (s, 4H).

**<sup>13</sup>C NMR** (126 MHz, CDCl<sub>3</sub>) δ 157.7, 155.0, 147.8, 145.9, 135.3, 129.8, 129.0, 126.3, 124.9, 123.1, 118.8, 188.7, 49.4, 42.6, 42.5, 37.1, 37.1, 36.1, 29.8, 21.0.

**IR** (film): ν (cm<sup>-1</sup>) 3935, 3056, 2918, 2903, 2810, 2578, 2483, 1938, 1430, 1365, 1290, 1232, 978, 911, 859, 700.

**HRMS** (ESI-TOF, *m/z*) calculated for C<sub>29</sub>H<sub>30</sub>NaO<sup>+</sup> [*M*+Na]<sup>+</sup> 417.2189, found 417.2200.

### 1-methyl-4-(1-(4-phenoxyphenyl)ethyl)benzene (**68**)

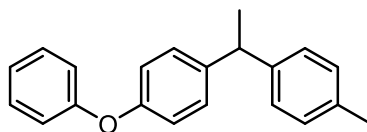

A Schlenk tube (10 mL) was charged with diphenyl ether (**1d**, 51.1 mg, 0.30 mmol), 1-ethyl-4-methylbenzene (**2y**, 108.2 mg, 0.90 mmol),  $\text{FeCl}_3 \cdot 6\text{H}_2\text{O}$  (16.2 mg, 0.060 mmol) and  $(\text{CHCl}_2)_2$  (0.75 mL). The mixture was degassed *via* three freeze-pump-thaw cycles, then filled with dry air. The Schlenk tube was positioned approximately 5 cm away from a 50 W LED lamp ( $\lambda_{\text{max}} = 410$  nm). After being stirred at 25 °C for 48 h, the reaction mixture was concentrated to dryness. Purification using silica gel column chromatography (elution with PE:DCM = 5:1) gave the pure product **68** as a colorless oil (51.9 mg, 0.180 mmol, 60% yield).

**$^1\text{H}$  NMR** (500 MHz,  $\text{CDCl}_3$ )  $\delta$  7.32 (t,  $J = 7.9$  Hz, 2H), 7.19 (d,  $J = 8.4$  Hz, 2H), 7.13 (d,  $J = 1.4$  Hz, 4H), 7.08 (t,  $J = 7.4$  Hz, 1H), 7.02 – 6.98 (m, 2H), 6.93 (d,  $J = 8.6$  Hz, 2H), 4.12 (q,  $J = 7.2$  Hz, 1H), 2.33 (s, 3H), 1.63 (d,  $J = 7.2$  Hz, 3H).

**$^{13}\text{C}$  NMR** (126 MHz,  $\text{CDCl}_3$ )  $\delta$  157.7, 155.4, 143.6, 141.7, 135.7, 129.8, 129.2, 128.9, 127.6, 123.1, 119.0, 118.8, 43.9, 22.2, 21.1.

**IR** (film):  $\nu$  ( $\text{cm}^{-1}$ ) 3135, 3094, 3005, 2929, 2873, 1893, 1791, 1516, 1377, 1234, 1118, 1022, 966, 816, 698, 468.

**HRMS** (ESI-TOF,  $m/z$ ) calculated for  $\text{C}_{21}\text{H}_{21}\text{O}^+$   $[\text{M}+\text{H}]^+$  289.1587, found 289.1592.

### 1-ethyl-4-(4-phenoxybenzyl)benzene (**68'**)

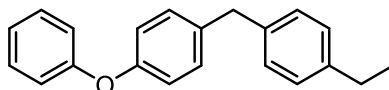

A Schlenk tube (10 mL) was charged with diphenyl ether (**1d**, 51.1 mg, 0.30 mmol), 1-ethyl-4-methylbenzene (**2y**, 108.2 mg, 0.90 mmol),  $\text{FeCl}_3 \cdot 6\text{H}_2\text{O}$  (16.2 mg, 0.060 mmol) and  $(\text{CHCl}_2)_2$  (0.75 mL). The mixture was degassed *via* three freeze-pump-thaw cycles, then filled with dry air. The Schlenk tube was positioned approximately 5 cm away from a 50 W LED lamp ( $\lambda_{\text{max}} = 410$  nm). After being stirred at 25 °C for 48 h, the reaction mixture was concentrated to dryness. Purification using silica gel column chromatography (elution with PE:DCM = 5:1) gave the pure product **68'** as a colorless oil (10.4 mg, 0.036 mmol, 12% yield).

**$^1\text{H}$  NMR** (500 MHz,  $\text{CDCl}_3$ )  $\delta$  7.34 (t,  $J = 7.9$  Hz, 2H), 7.20 – 7.12 (m, 6H), 7.10 (t,  $J = 7.4$  Hz, 1H), 7.02 (d,  $J = 7.9$  Hz, 2H), 6.96 (d,  $J = 8.5$  Hz, 2H), 3.96 (s, 2H), 2.65 (q,  $J = 7.6$  Hz, 2H), 1.26 (t,  $J = 7.6$  Hz, 3H).

**$^{13}\text{C}$  NMR** (126 MHz,  $\text{CDCl}_3$ )  $\delta$  157.7, 155.5, 142.2, 138.5, 136.5, 130.2, 129.8, 128.9, 128.1, 123.1, 119.2, 118.7, 40.9, 28.6, 15.8.

**IR** (film):  $\nu$  (cm<sup>-1</sup>) 3135, 3094, 2966, 2929, 2731, 1893, 1649, 1516, 1377, 1234, 1118, 1022, 960, 816, 698, 468.

**HRMS** (ESI-TOF,  $m/z$ ) calculated for C<sub>21</sub>H<sub>21</sub>O<sup>+</sup> [M+H]<sup>+</sup> 289.1587, found 289.1592.

**1-isopropyl-4-(4-(1-(4-methoxyphenyl)ethyl)phenoxy)benzene (69)**

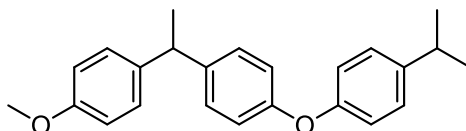

A Schlenk tube (10 mL) was charged with anisole (**1a**, 32.4 mg, 0.30 mmol), 1-ethyl-4-(4-isopropylphenoxy)benzene (**2z**, 216.3 mg, 0.90 mmol), FeCl<sub>3</sub>·6H<sub>2</sub>O (16.2 mg, 0.060 mmol) and DCE (0.75 mL). The mixture was degassed *via* three freeze-pump-thaw cycles, then filled with dry air. The Schlenk tube was positioned approximately 5 cm away from a 50 W LED lamp ( $\lambda_{\text{max}}$  = 410 nm). After being stirred at 25 °C for 48 h, the reaction mixture was concentrated to dryness. Purification using silica gel column chromatography (elution with PE:DCM = 6:1) gave the pure product **69** as a colorless oil (73.7 mg, 0.213 mmol, 71% yield).

**<sup>1</sup>H NMR** (500 MHz, CDCl<sub>3</sub>)  $\delta$  7.20 (t,  $J$  = 6.0 Hz, 6H), 6.98 – 6.94 (m, 4H), 6.88 (d,  $J$  = 8.9 Hz, 2H), 4.12 (q,  $J$  = 7.2 Hz, 1H), 3.81 (s, 3H), 2.97 – 2.88 (m, 1H), 1.64 (d,  $J$  = 7.2 Hz, 3H), 1.28 (d,  $J$  = 6.9 Hz, 6H).

**<sup>13</sup>C NMR** (126 MHz, CDCl<sub>3</sub>)  $\delta$  158.0, 155.8, 155.4, 143.8, 141.5, 138.8, 128.7, 128.6, 127.6, 118.8, 118.6, 113.9, 55.3, 43.4, 33.6, 24.3, 22.4.

**IR** (film):  $\nu$  (cm<sup>-1</sup>) 3101, 3065, 3032, 2933, 2877, 1944, 1801, 1666, 1558, 1494, 1452, 1351, 1323, 1028, 906, 533, 518.

**HRMS** (ESI-TOF,  $m/z$ ) calculated for C<sub>24</sub>H<sub>27</sub>O<sub>2</sub><sup>+</sup> [M+H]<sup>+</sup> 347.2006, found 347.2011.

**1-cyclohexyl-4-(1-(4-phenoxyphenyl)ethyl)benzene (70)**

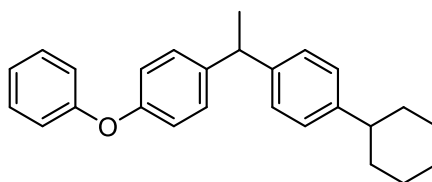

A Schlenk tube (10 mL) was charged with diphenyl ether (**1d**, 51.1 mg, 0.30 mmol), 1-cyclohexyl-4-ethylbenzene (**2za**, 169.5 mg, 0.90 mmol), FeCl<sub>3</sub>·6H<sub>2</sub>O (16.2 mg, 0.060 mmol) and DCE (0.75 mL). The mixture was degassed *via* three freeze-pump-thaw cycles, then filled with dry air. The Schlenk tube was positioned approximately 5 cm away from a 50 W LED lamp ( $\lambda_{\text{max}}$  = 410 nm). After being stirred at 25 °C for 48 h, the reaction mixture was concentrated to dryness. Purification using silica gel column chromatography (elution with PE:DCM = 5:1) gave the pure product **70** as a colorless oil (64.1 mg, 0.180 mmol, 60% yield).

**<sup>1</sup>H NMR** (500 MHz, CDCl<sub>3</sub>) δ 7.32 (t, *J* = 7.9 Hz, 2H), 7.19 (d, *J* = 8.4 Hz, 2H), 7.15 (s, 4H), 7.08 (t, *J* = 7.4 Hz, 1H), 7.01 (d, *J* = 7.8 Hz, 2H), 6.94 (d, *J* = 8.5 Hz, 2H), 4.11 (t, *J* = 7.2 Hz, 1H), 2.48 (dd, *J* = 10.9, 7.9 Hz, 1H), 1.89 – 1.82 (m, 5H), 1.75 (d, *J* = 12.6 Hz, 1H), 1.63 (d, *J* = 7.2 Hz, 3H), 1.48 – 1.32 (m, 4H).

**<sup>13</sup>C NMR** (126 MHz, CDCl<sub>3</sub>) δ 157.6, 155.4, 145.9, 143.8, 141.8, 129.8, 129.0, 127.5, 126.9, 123.1, 118.9, 118.8, 44.2, 43.9, 34.6, 27.1, 26.3, 22.3.

**IR** (film): *ν* (cm<sup>-1</sup>) 3080, 3066, 3001, 2777, 2669, 1939, 103, 1494, 1449, 1369, 1266, 1178, 1132, 1003, 986, 863, 765, 689, 526.

**HRMS** (ESI-TOF, *m/z*) calculated for C<sub>26</sub>H<sub>29</sub>O<sup>+</sup> [M+H]<sup>+</sup> 357.2213, found 357.2216.

### 1-cinnamyl-4-methoxybenzene (71)

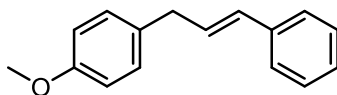

A Schlenk tube (10 mL) was charged with anisole (**1a**, 32.4 mg, 0.30 mmol), *β*-methylstyrene (**2zb**, 106.4 mg, 0.90 mmol), FeCl<sub>3</sub>·6H<sub>2</sub>O (16.2 mg, 0.060 mmol) and DCE (0.75 mL). The mixture was degassed *via* three freeze-pump-thaw cycles, then filled with dry air. The Schlenk tube was positioned approximately 5 cm away from a 50 W LED lamp (*λ*<sub>max</sub> = 410 nm). After being stirred at 25 °C for 48 h, the reaction mixture was concentrated to dryness. Purification using silica gel column chromatography (elution with PE:DCM = 5:1) gave the pure product **71** as a colorless oil (44.4 mg, 0.198 mmol, 66% yield).

**<sup>1</sup>H NMR** (500 MHz, CDCl<sub>3</sub>) δ 7.37 (d, *J* = 7.3 Hz, 2H), 7.30 (t, *J* = 7.6 Hz, 2H), 7.22 (d, *J* = 7.3 Hz, 1H), 7.17 (d, *J* = 8.6 Hz, 2H), 6.89 – 6.85 (m, 2H), 6.45 (d, *J* = 15.8 Hz, 1H), 6.35 (m, 1H), 3.81 (s, 3H), 3.50 (d, *J* = 6.6 Hz, 2H).

**<sup>13</sup>C NMR** (126 MHz, CDCl<sub>3</sub>) δ 158.2, 137.7, 132.3, 130.9, 129.8, 129.7, 128.6, 127.2, 126.2, 114.1, 55.4, 38.6.

**IR** (film): *ν* (cm<sup>-1</sup>) 3103, 3083, 3061, 2934, 2915, 1663, 1644, 1578, 1443, 1408, 1379, 1105, 1081, 1069, 981, 964, 913, 806, 767, 613, 499.

**HRMS** (ESI-TOF, *m/z*) calculated for C<sub>16</sub>H<sub>17</sub>O<sup>+</sup> [M+H]<sup>+</sup> 225.1274, found 225.1279.

### 1-cinnamyl-4-phenoxybenzene (72)

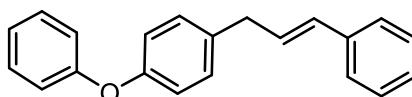

A Schlenk tube (10 mL) was charged with diphenyl ether (**1d**, 51.1 mg, 0.30 mmol), *β*-methylstyrene (**2zb**, 106.4 mg, 0.90 mmol), FeCl<sub>3</sub>·6H<sub>2</sub>O (16.2 mg, 0.060 mmol) and DCE (0.75 mL). The mixture was degassed *via* three freeze-pump-thaw cycles, then filled with dry air.

The Schlenk tube was positioned approximately 5 cm away from a 50 W LED lamp ( $\lambda_{\text{max}} = 410$  nm). After being stirred at 25 °C for 48 h, the reaction mixture was concentrated to dryness. Purification using silica gel column chromatography (elution with PE:DCM = 5:1) gave the pure product **72** as a colorless oil (58.4 mg, 0.204 mmol, 68% yield).

**$^1\text{H}$  NMR** (500 MHz,  $\text{CDCl}_3$ )  $\delta$  7.36 (d,  $J = 7.4$  Hz, 2H), 7.33 – 7.27 (m, 4H), 7.20 (m, 3H), 7.07 (t,  $J = 7.4$  Hz, 1H), 7.02 – 6.92 (m, 4H), 6.46 (d,  $J = 15.8$  Hz, 1H), 6.35 (m, 1H), 3.53 (d,  $J = 6.7$  Hz, 2H).

**$^{13}\text{C}$  NMR** (126 MHz,  $\text{CDCl}_3$ )  $\delta$  157.7, 155.6, 137.6, 135.3, 131.2, 130.0, 129.8, 129.4, 128.7, 127.3, 126.3, 123.1, 119.3, 118.7, 38.8.

**IR** (film):  $\nu$  ( $\text{cm}^{-1}$ ) 3093, 3079, 3036, 2963, 2916, 1654, 1562, 1424, 1401, 1339, 1133, 1090, 1056, 963, 815, 735, 656, 513.

**HRMS** (ESI-TOF,  $m/z$ ) calculated for  $\text{C}_{21}\text{H}_{19}\text{O}^+$   $[\text{M}+\text{H}]^+$  287.1430, found 287.1425.

#### (*E*)-1-(2-methyl-3-phenylallyl)-4-phenoxybenzene (**73**)

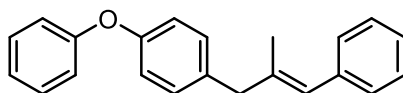

A Schlenk tube (10 mL) was charged with diphenyl ether (**1d**, 51.1 mg, 0.30 mmol), 2-methyl-1-phenylpropene (**2zc**, 119.0 mg, 0.90 mmol),  $\text{FeCl}_3 \cdot 6\text{H}_2\text{O}$  (16.2 mg, 0.060 mmol) and DCE (0.75 mL). The mixture was degassed *via* three freeze-pump-thaw cycles, then filled with dry air. The Schlenk tube was positioned approximately 5 cm away from a 50 W LED lamp ( $\lambda_{\text{max}} = 410$  nm). After being stirred at 25 °C for 48 h, the reaction mixture was concentrated to dryness. Purification using silica gel column chromatography (elution with PE:DCM = 5:1) gave the pure product **73** as a white solid (52.2 mg, 0.174 mmol, 58% yield).

**$^1\text{H}$  NMR** (500 MHz,  $\text{CDCl}_3$ )  $\delta$  7.32 (m, 5H), 7.28 (d,  $J = 2.8$  Hz, 2H), 7.22 (d,  $J = 8.5$  Hz, 2H), 7.10 (d,  $J = 7.4$  Hz, 1H), 7.01 (d,  $J = 8.0$  Hz, 2H), 6.97 (d,  $J = 8.4$  Hz, 2H), 6.38 (s, 1H), 3.46 (s, 2H), 1.82 (s, 3H).

**$^{13}\text{C}$  NMR** (126 MHz,  $\text{CDCl}_3$ )  $\delta$  157.7, 155.7, 138.4, 138.3, 134.9, 130.4, 129.8, 129.0, 128.2, 126.9, 126.3, 123.1, 119.1, 118.8, 46.5, 17.8.

**IR** (film):  $\nu$  ( $\text{cm}^{-1}$ ) 3016, 2978, 2881, 2750, 1694, 1612, 1566, 1477, 1259, 1142, 1067, 1053, 992, 926, 832, 756, 642, 557.

**HRMS** (ESI-TOF,  $m/z$ ) calculated for  $\text{C}_{22}\text{H}_{21}\text{O}^+$   $[\text{M}+\text{H}]^+$  301.1587, found 301.1588.

### 1-(4-phenoxyphenyl)adamantane (**74**)

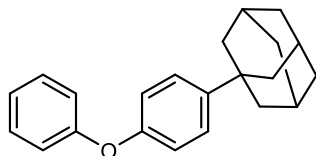

A Schlenk tube (10 mL) was charged with diphenyl ether (**1d**, 51.1 mg, 0.30 mmol), adamantane (**2zd**, 408.7 mg, 3.0 mmol),  $\text{FeCl}_3 \cdot 6\text{H}_2\text{O}$  (16.2 mg, 0.060 mmol) and DCE (0.75 mL). The mixture was degassed *via* three freeze-pump-thaw cycles, then filled with dry air. The Schlenk tube was positioned approximately 5 cm away from a 40 W LED lamp ( $\lambda_{\text{max}} = 370$  nm). After being stirred at 80 °C for 60 h, the reaction mixture was concentrated to dryness. Purification using silica gel column chromatography (elution with PE) gave the pure product **74** as a white solid (44.7 mg, 0.147 mmol, 49% yield).

**$^1\text{H}$  NMR** (500 MHz,  $\text{CDCl}_3$ )  $\delta$  7.35 – 7.30 (m, 4H), 7.08 (t,  $J = 7.4$  Hz, 1H), 7.01 (dd,  $J = 8.6$ , 0.9 Hz, 2H), 6.98 – 6.94 (m, 2H), 2.10 (s, 3H), 1.91 (d,  $J = 2.5$  Hz, 6H), 1.77 (q,  $J = 12.1$  Hz, 6H).

**$^{13}\text{C}$  NMR** (126 MHz,  $\text{CDCl}_3$ )  $\delta$  157.7, 154.9, 146.6, 129.8, 126.2, 123.0, 118.8, 118.6, 43.5, 36.9, 36.0, 29.1.

**IR** (film):  $\nu$  ( $\text{cm}^{-1}$ ) 3939, 3068, 3040, 2933, 2901, 2822, 2552, 1954, 1456, 1363, 1333, 1289, 1102, 988, 899, 792, 869, 693.

**HRMS** (ESI-TOF,  $m/z$ ) calculated for  $\text{C}_{22}\text{H}_{25}\text{O}^+$   $[\text{M}+\text{H}]^+$  305.1900, found 305.1911.

### 1-methyl-3-(4-phenoxyphenyl)adamantane (**75**)

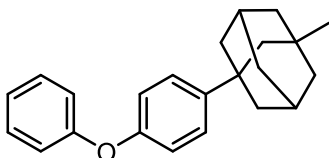

A Schlenk tube (10 mL) was charged with diphenyl ether (**1d**, 51.1 mg, 0.30 mmol), 1-methyladamantane (**2ze**, 450.8 mg, 3.0 mmol),  $\text{FeCl}_3 \cdot 6\text{H}_2\text{O}$  (16.2 mg, 0.060 mmol) and DCE (0.75 mL). The mixture was degassed *via* three freeze-pump-thaw cycles, then filled with dry air. The Schlenk tube was positioned approximately 5 cm away from a 40 W LED lamp ( $\lambda_{\text{max}} = 370$  nm). After being stirred at 80 °C for 60 h, the reaction mixture was concentrated to dryness. Purification using silica gel column chromatography (elution with PE) gave the pure product **75** as a colorless oil (38.2 mg, 0.120 mmol, 40% yield).

**$^1\text{H}$  NMR** (500 MHz,  $\text{CDCl}_3$ )  $\delta$  7.34 – 7.30 (m, 4H), 7.08 (t,  $J = 7.4$  Hz, 1H), 7.01 (d,  $J = 8.2$  Hz, 2H), 6.97 (d,  $J = 8.7$  Hz, 2H), 2.16 (s, 2H), 1.83 (dd,  $J = 29.5$ , 11.8 Hz, 5H), 1.70 – 1.66 (m, 2H), 1.50 (q,  $J = 12.2$  Hz, 5H), 0.88 (s, 3H).

**$^{13}\text{C}$  NMR** (126 MHz,  $\text{CDCl}_3$ )  $\delta$  157.8, 154.9, 146.3, 129.8, 126.3, 123.0, 118.8, 118.7, 50.6,

43.9, 42.8, 36.9, 36.1, 31.3, 31.0, 29.7.

**IR** (film):  $\nu$  (cm<sup>-1</sup>) 3931, 3055, 2921, 2895, 2814, 2498, 1931, 1433, 1343, 1290, 1110, 976, 902, 869, 703.

**HRMS** (ESI-TOF,  $m/z$ ) calculated for C<sub>23</sub>H<sub>27</sub>O<sup>+</sup> [M+H]<sup>+</sup> 319.2056, found 319.2060.

### 3-cyclopentyl-1H-indole (76)

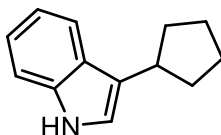

A Schlenk tube (10 mL) was charged with indole (**1ze**, 35.1 mg, 0.30 mmol), cyclopentane (**2zf**, 0.75 mL) and FeBr<sub>3</sub> (32.5 mg, 0.11 mmol). The mixture was degassed *via* three freeze-pump-thaw cycles, then filled with dry air. The Schlenk tube was positioned approximately 5 cm away from a 40 W LED lamp ( $\lambda_{\text{max}}$  = 370 nm). After being stirred at 25 °C for 120 h, the reaction mixture was concentrated to dryness. Purification using silica gel column chromatography (elution with PE:DCM = 2:1) gave the pure product **76** as a white solid (23.9 mg, 0.129 mmol, 43% yield).

**<sup>1</sup>H NMR** (500 MHz, CDCl<sub>3</sub>)  $\delta$  7.78 (d,  $J$  = 7.9 Hz, 1H), 7.72 (s, 1H), 7.37 (d,  $J$  = 8.1 Hz, 1H), 7.30 (t,  $J$  = 7.5 Hz, 1H), 7.23 (t,  $J$  = 7.4 Hz, 1H), 3.42 – 3.35 (m, 1H), 2.30 – 2.24 (m, 2H), 1.96 – 1.89 (m, 2H), 1.87 – 1.79 (m, 4H).

**<sup>13</sup>C NMR** (126 MHz, CDCl<sub>3</sub>)  $\delta$  136.7, 127.4, 121.9, 121.3, 119.8, 119.7, 119.1, 111.2, 37.1, 33.3, 25.4.

**IR** (film):  $\nu$  (cm<sup>-1</sup>) 3930, 3068, 3041, 2844, 2539, 1950, 1457, 1363, 1111, 983, 893, 788, 867, 663.

**HRMS** (ESI-TOF,  $m/z$ ) calculated for C<sub>13</sub>H<sub>16</sub>N<sup>+</sup> [M+H]<sup>+</sup> 186.1277, found 186.1271.

### 3-cyclohexyl-1H-indole (77)

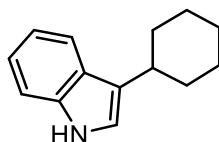

A Schlenk tube (10 mL) was charged with indole (**1ze**, 35.1 mg, 0.30 mmol), cyclohexane (**2zg**, 0.75 mL) and FeBr<sub>3</sub> (32.5 mg, 0.11 mmol). The mixture was degassed *via* three freeze-pump-thaw cycles, then filled with dry air. The Schlenk tube was positioned approximately 5 cm away from a 40 W LED lamp ( $\lambda_{\text{max}}$  = 370 nm). After being stirred at 25 °C for 120 h, the reaction mixture was concentrated to dryness. Purification using silica gel column chromatography (elution with PE:DCM = 2:1) gave the pure product **77** as a white solid (24.5

mg, 0.123 mmol, 41% yield).

**<sup>1</sup>H NMR** (500 MHz, CDCl<sub>3</sub>) δ 7.85 (s, 1H), 7.69 (d, *J* = 7.9 Hz, 1H), 7.36 (d, *J* = 8.1 Hz, 1H), 7.20 (t, *J* = 7.5 Hz, 1H), 7.13 (t, *J* = 7.5 Hz, 1H), 6.95 (d, *J* = 2.2 Hz, 1H), 2.91 – 2.81 (m, 1H), 2.15 (t, *J* = 9.6 Hz, 2H), 1.91 – 1.85 (m, 2H), 1.81 (d, *J* = 12.7 Hz, 1H), 1.50 (t, *J* = 9.9 Hz, 4H), 1.36 – 1.29 (m, 1H).

**<sup>13</sup>C NMR** (126 MHz, CDCl<sub>3</sub>) δ 136.5, 126.9, 123.4, 121.9, 119.5, 119.4, 119.1, 111.2, 35.6, 34.2, 27.1, 26.7.

**IR** (film): ν (cm<sup>-1</sup>) 3939, 3068, 3040, 2933, 2901, 2822, 2552, 1954, 1456, 1363, 1333, 1289, 1102, 988, 899, 792, 869, 693.

**HRMS** (ESI-TOF, *m/z*) calculated for C<sub>14</sub>H<sub>18</sub>N<sup>+</sup> [M+H]<sup>+</sup> 200.1434, found 200.1440.

### 3-cycloheptyl-1*H*-indole (78)

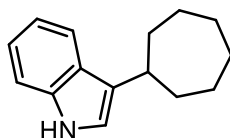

A Schlenk tube (10 mL) was charged with indole (**1ze**, 35.1 mg, 0.30 mmol), cycloheptane (**2zh**, 0.75 mL) and FeBr<sub>3</sub> (32.5 mg, 0.11 mmol). The mixture was degassed *via* three freeze-pump-thaw cycles, then filled with dry air. The Schlenk tube was positioned approximately 5 cm away from a 40 W LED lamp (λ<sub>max</sub> = 370 nm). After being stirred at 25 °C for 120 h, the reaction mixture was concentrated to dryness. Purification using silica gel column chromatography (elution with PE:DCM = 2:1) gave the pure product **78** as a white solid (26.2 mg, 0.123 mmol, 41% yield).

**<sup>1</sup>H NMR** (500 MHz, CDCl<sub>3</sub>) δ 7.84 (s, 1H), 7.64 (d, *J* = 7.9 Hz, 1H), 7.35 (d, *J* = 8.1 Hz, 1H), 7.19 (t, *J* = 7.5 Hz, 1H), 7.11 (t, *J* = 7.5 Hz, 1H), 6.96 (d, *J* = 2.2 Hz, 1H), 3.09 – 3.03 (m, 1H), 2.12 (ddd, *J* = 8.9, 6.6, 3.1 Hz, 2H), 1.84 – 1.78 (m, 2H), 1.78 – 1.70 (m, 4H), 1.66 – 1.59 (m, 4H).

**<sup>13</sup>C NMR** (126 MHz, CDCl<sub>3</sub>) δ 136.6, 126.8, 124.6, 121.9, 119.5, 119.44, 119.1, 111.2, 37.4, 35.8, 28.5, 27.1.

**IR** (film): ν (cm<sup>-1</sup>) 3944, 3077, 3053, 3046, 2941, 2801, 2664, 2553, 1936, 1476, 1338, 1323, 1269, 1024, 999, 876, 791, 866, 644, 593.

**HRMS** (ESI-TOF, *m/z*) calculated for C<sub>15</sub>H<sub>20</sub>N<sup>+</sup> [M+H]<sup>+</sup> 214.1590, found 214.1588.

### 3-(4,4-dimethylcyclohexyl)-1H-indole (79)

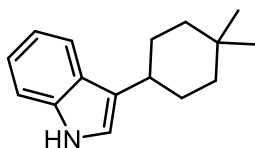

A Schlenk tube (10 mL) was charged with indole (**1ze**, 35.1 mg, 0.30 mmol), 1,1-dimethylcyclohexane (**2zi**, 0.75 mL) and FeBr<sub>3</sub> (32.5 mg, 0.11 mmol). The mixture was degassed *via* three freeze-pump-thaw cycles, then filled with dry air. The Schlenk tube was positioned approximately 5 cm away from a 40 W LED lamp ( $\lambda_{\text{max}} = 370$  nm). After being stirred at 25 °C for 120 h, the reaction mixture was concentrated to dryness. Purification using silica gel column chromatography (elution with PE:DCM = 2:1) gave the pure product **79** as a white solid (29.3 mg, 0.129 mmol, 43% yield).

**<sup>1</sup>H NMR** (500 MHz, CDCl<sub>3</sub>)  $\delta$  7.81 (d,  $J = 7.9$  Hz, 1H), 7.78 (s, 1H), 7.41 (d,  $J = 8.0$  Hz, 1H), 7.32 (t,  $J = 7.7$  Hz, 1H), 7.25 (t,  $J = 7.4$  Hz, 1H), 7.00 (d,  $J = 2.1$  Hz, 1H), 2.89 (tt,  $J = 12.0, 3.5$  Hz, 1H), 2.10 – 2.04 (m, 2H), 1.87 – 1.77 (m, 2H), 1.66 (d,  $J = 12.8$  Hz, 2H), 1.60 – 1.52 (m, 2H), 1.15 (s, 3H), 1.14 (s, 3H).

**<sup>13</sup>C NMR** (126 MHz, CDCl<sub>3</sub>)  $\delta$  136.5, 127.0, 122.8, 121.9, 119.6, 119.5, 119.1, 111.3, 39.9, 35.6, 33.3, 30.2, 29.8, 24.6.

**IR** (film):  $\nu$  (cm<sup>-1</sup>) 3943, 3066, 3061, 2912, 2844, 2738, 1976, 1456, 1444, 1384, 1365, 1343, 1217, 1175, 1062, 974, 954, 939, 857, 843.

**HRMS** (ESI-TOF,  $m/z$ ) calculated for C<sub>16</sub>H<sub>22</sub>N<sup>+</sup> [M+H]<sup>+</sup> 228.1747, found 228.1751.

### 2-((4-(1-([1,1'-biphenyl]-4-yl)ethyl)phenoxy)methyl)tetrahydrofuran (92)

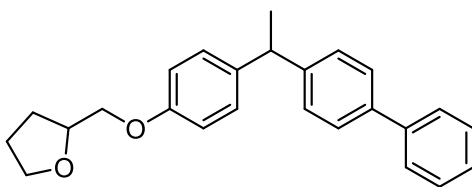

A Schlenk tube (10 mL) was charged with 2-(phoxymethyl)tetrahydrofuran (**1zo**, 53.4 mg, 0.30 mmol), 4-ethylbiphenyl (**2a**, 164.0 mg, 0.90 mmol), FeCl<sub>3</sub>·6H<sub>2</sub>O (16.2 mg, 0.060 mmol) and (CHCl<sub>2</sub>)<sub>2</sub> (0.75 mL). The mixture was degassed *via* three freeze-pump-thaw cycles, then filled with dry air. The Schlenk tube was positioned approximately 5 cm away from a 50 W LED lamp ( $\lambda_{\text{max}} = 410$  nm). After being stirred at 25 °C for 48 h, the reaction mixture was concentrated to dryness. Purification using silica gel column chromatography (elution with PE:DCM = 2:1) gave the pure product **92** as a white solid (64.5 mg, 0.180 mmol, 60% yield).

**<sup>1</sup>H NMR** (500 MHz, CDCl<sub>3</sub>)  $\delta$  7.58 – 7.55 (m, 2H), 7.53 – 7.49 (m, 2H), 7.42 (dd,  $J = 10.5, 4.8$  Hz, 2H), 7.34 – 7.30 (m, 1H), 7.27 (d,  $J = 8.1$  Hz, 2H), 7.16 (d,  $J = 8.6$  Hz, 2H), 6.89 – 6.86 (m, 2H), 4.29 – 4.24 (m, 1H), 4.15 (q,  $J = 7.2$  Hz, 1H), 3.98 – 3.95 (m, 1H), 3.94 – 3.90 (m,

2H), 3.83 (dd,  $J = 14.4, 7.6$  Hz, 1H), 2.09 – 2.03 (m, 1H), 1.95 (dtd,  $J = 10.9, 8.3, 6.8$  Hz, 2H), 1.79 – 1.73 (m, 1H), 1.65 (d,  $J = 7.2$  Hz, 3H).

**$^{13}\text{C}$  NMR** (126 MHz,  $\text{CDCl}_3$ )  $\delta$  157.2, 145.9, 141.0, 138.9, 138.6, 128.7, 128.5, 127.9, 127.1, 127.0, 114.5, 77.1, 70.5, 68.6, 43.7, 28.3, 25.7, 22.1.

**IR** (film):  $\nu$  ( $\text{cm}^{-1}$ ) 3600, 344, 2977, 2874, 1460, 1445, 1356, 1434, 1285, 1203, 1197, 1098, 1042, 975, 932, 901, 867, 648, 489.

**HRMS** (ESI-TOF,  $m/z$ ) calculated for  $\text{C}_{25}\text{H}_{27}\text{O}_2^+$   $[\text{M}+\text{H}]^+$  359.2006, found 359.2014.

### 1-((4-(1-([1,1'-biphenyl]-4-yl)ethyl)phenoxy)methyl)adamantane (**93**)

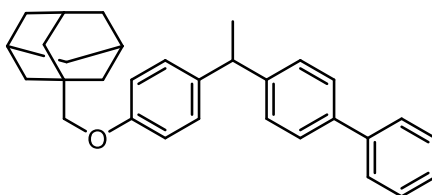

A Schlenk tube (10 mL) was charged with 1-(phoxymethyl)adamantane (**1zp**, 72.7 mg, 0.30 mmol), 4-ethylbiphenyl (**2a**, 164.0 mg, 0.90 mmol),  $\text{FeCl}_3 \cdot 6\text{H}_2\text{O}$  (16.2 mg, 0.060 mmol) and  $(\text{CHCl}_2)_2$  (0.75 mL). The mixture was degassed *via* three freeze-pump-thaw cycles, then filled with dry air. The Schlenk tube was positioned approximately 5 cm away from a 50 W LED lamp ( $\lambda_{\text{max}} = 410$  nm). After being stirred at 25 °C for 48 h, the reaction mixture was concentrated to dryness. Purification using silica gel column chromatography (elution with PE:DCM = 2:1) gave the pure product **93** as a white solid (63.3 mg, 0.150 mmol, 50% yield).

**$^1\text{H}$  NMR** (500 MHz,  $\text{CDCl}_3$ )  $\delta$  7.62 – 7.59 (m, 1H), 7.55 (dd,  $J = 6.3, 2.0$  Hz, 1H), 7.44 (d,  $J = 1.6$  Hz, 1H), 7.34 (d,  $J = 14.6$  Hz, 1H), 7.21 (s, 1H), 6.90 (s, 1H), 4.18 (d,  $J = 7.2$  Hz, 1H), 3.51 (s, 1H), 2.05 (dd,  $J = 6.2, 3.2$  Hz, 1H), 1.80 – 1.73 (m, 1H), 1.70 – 1.68 (m, 1H).

**$^{13}\text{C}$  NMR** (126 MHz,  $\text{CDCl}_3$ )  $\delta$  158.2, 146.2, 141.2, 138.9, 138.1, 128.8, 128.6, 128.0, 127.2, 127.1, 114.5, 78.4, 43.8, 39.7, 37.3, 33.9, 28.4, 22.2.

**IR** (film):  $\nu$  ( $\text{cm}^{-1}$ ) 3229, 2913, 2845, 2674, 2655, 1471, 1434, 1367, 1346, 1316, 1221, 1172, 1104, 1042, 998, 975, 939, 912, 805, 699, 600, 488.

**HRMS** (ESI-TOF,  $m/z$ ) calculated for  $\text{C}_{31}\text{H}_{35}\text{O}^+$   $[\text{M}+\text{H}]^+$  423.2682, found 423.2683.

### 6-(1-([1,1'-biphenyl]-4-yl)ethyl)benzo[d][1,3]dioxol-5-ol (**94**)

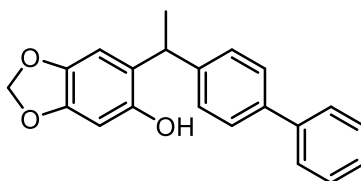

A Schlenk tube (10 mL) was charged with sesamol (**1zq**, 41.4 mg, 0.30 mmol), 4-ethylbiphenyl

(**2a**, 164.0 mg, 0.90 mmol), FeCl<sub>3</sub>·6H<sub>2</sub>O (16.2 mg, 0.060 mmol) and CHCl<sub>3</sub> (0.75 mL). The mixture was degassed *via* three freeze-pump-thaw cycles, then filled with dry air. The Schlenk tube was positioned approximately 5 cm away from a 50 W LED lamp ( $\lambda_{\text{max}}$  = 410 nm). After being stirred at 25 °C for 48 h, the reaction mixture was concentrated to dryness. Purification using silica gel column chromatography (elution with PE:DCM = 2:1) gave the pure product **94** as a white solid (59.2 mg, 0.186 mmol, 62% yield).

**<sup>1</sup>H NMR** (500 MHz, CDCl<sub>3</sub>)  $\delta$  7.59 – 7.56 (m, 2H), 7.54 (d,  $J$  = 8.2 Hz, 2H), 7.43 (t,  $J$  = 7.7 Hz, 2H), 7.35 – 7.32 (m, 3H), 6.78 (s, 1H), 6.40 (s, 1H), 5.90 (d,  $J$  = 3.5 Hz, 2H), 4.36 (q,  $J$  = 7.2 Hz, 1H), 1.62 (d,  $J$  = 7.2 Hz, 3H).

**<sup>13</sup>C NMR** (126 MHz, CDCl<sub>3</sub>)  $\delta$  147.7, 146.3, 144.6, 141.7, 140.9, 139.4, 128.8, 127.8, 127.5, 127.2, 127.1, 124.2, 107.4, 101.1, 98.9, 38.1, 21.3.

**IR** (film):  $\nu$  (cm<sup>-1</sup>) 3474, 2964, 2927, 1503, 1485, 1436, 1169, 1037, 852, 766, 697, 590.

**HRMS** (ESI-TOF,  $m/z$ ) calculated for C<sub>21</sub>H<sub>19</sub>O<sub>3</sub><sup>+</sup> [M+H]<sup>+</sup> 319.1329, found 319.1321.

#### 4-(1-(4-(((1*R*,2*S*,5*R*)-2-isopropyl-5-methylcyclohexyl)oxy)phenyl)ethyl)-1,1'-biphenyl (**95**)

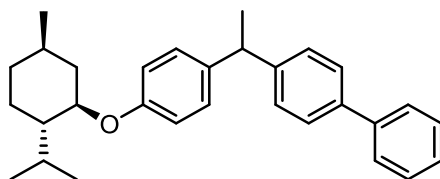

A Schlenk tube (10 mL) was charged with (((1*R*,2*S*,5*R*)-2-isopropyl-5-methylcyclohexyl)oxy)benzene (**1zr**, 69.7 mg, 0.30 mmol), 4-ethylbiphenyl (**2a**, 164.0 mg, 0.90 mmol), FeCl<sub>3</sub>·6H<sub>2</sub>O (16.2 mg, 0.060 mmol) and (CHCl<sub>2</sub>)<sub>2</sub> (0.75 mL). The mixture was degassed *via* three freeze-pump-thaw cycles, then filled with dry air. The Schlenk tube was positioned approximately 5 cm away from a 50 W LED lamp ( $\lambda_{\text{max}}$  = 410 nm). After being stirred at 25 °C for 48 h, the reaction mixture was concentrated to dryness. Purification using silica gel column chromatography (elution with PE:DCM = 5:1) gave the pure product **95** as a colorless oil (90.2 mg, 0.219 mmol, 73% yield).

**<sup>1</sup>H NMR** (500 MHz, CDCl<sub>3</sub>)  $\delta$  7.59 (d,  $J$  = 7.3 Hz, 2H), 7.53 (d,  $J$  = 8.2 Hz, 2H), 7.43 (t,  $J$  = 7.7 Hz, 2H), 7.35 – 7.30 (m, 3H), 7.16 (d,  $J$  = 8.5 Hz, 2H), 6.86 (d,  $J$  = 8.6 Hz, 2H), 4.15 (q,  $J$  = 7.2 Hz, 1H), 4.01 (td,  $J$  = 10.5, 4.1 Hz, 1H), 2.23 (tt,  $J$  = 9.1, 3.5 Hz, 1H), 2.17 (d,  $J$  = 12.5 Hz, 1H), 1.75 – 1.70 (m, 2H), 1.67 (d,  $J$  = 7.2 Hz, 3H), 1.56 – 1.46 (m, 2H), 1.14 – 0.99 (m, 3H), 0.93 (dd,  $J$  = 9.5, 6.9 Hz, 6H), 0.79 (d,  $J$  = 6.9 Hz, 3H).

**<sup>13</sup>C NMR** (126 MHz, CDCl<sub>3</sub>)  $\delta$  156.8, 146.1, 141.2, 139.0, 138.3, 128.8, 128.67, 128.1, 127.21, 127.2, 115.9, 77.6, 48.2, 43.8, 40.5, 34.7, 31.6, 26.2, 23.9, 22.3, 22.2, 20.9, 16.7.

**IR** (film):  $\nu$  (cm<sup>-1</sup>) 3344, 332, 2956, 2870, 2772, 1385, 1345, 1313, 1227, 1141, 1104, 1079, 1026, 994, 967, 845, 555, 541, 493.

**HRMS** (ESI-TOF,  $m/z$ ) calculated for  $C_{30}H_{37}O^+$   $[M+H]^+$  413.2839, found 413.2848.

**(1*S*,2*R*,4*S*)-2-(4-(1-([1,1'-biphenyl]-4-yl)ethyl)phenoxy)-1,7,7-trimethylbicyclo[2.2.1]heptane (96)**

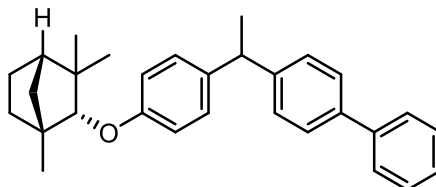

A Schlenk tube (10 mL) was charged with (1*R*,2*R*,4*S*)-2-(4-(1-([1,1'-biphenyl]-4-yl)ethyl)phenoxy)-1,3,3-trimethylbicyclo[2.2.1]heptane (**1zs**, 68.8 mg, 0.30 mmol), 4-ethylbiphenyl (**2a**, 164.0 mg, 0.90 mmol),  $FeCl_3 \cdot 6H_2O$  (16.2 mg, 0.060 mmol) and  $(CHCl_2)_2$  (0.75 mL). The mixture was degassed *via* three freeze-pump-thaw cycles, then filled with dry air. The Schlenk tube was positioned approximately 5 cm away from a 50 W LED lamp ( $\lambda_{max} = 410$  nm). After being stirred at 25 °C for 48 h, the reaction mixture was concentrated to dryness. Purification using silica gel column chromatography (elution with PE:DCM = 5:1) gave the pure product **96** as a colorless oil (68.9 mg, 0.168 mmol, 56% yield).

**$^1H$  NMR** (500 MHz,  $CDCl_3$ )  $\delta$  7.59 (dd,  $J = 8.2, 1.4$  Hz, 2H), 7.53 (s, 2H), 7.44 (dd,  $J = 9.7, 4.1$  Hz, 2H), 7.33 (dd,  $J = 12.8, 8.1$  Hz, 3H), 7.15 (dd,  $J = 6.5, 2.2$  Hz, 2H), 6.86 (dd,  $J = 6.6, 2.1$  Hz, 2H), 4.15 (dd,  $J = 14.4, 7.2$  Hz, 1H), 3.85 – 3.83 (m, 1H), 2.07 – 2.02 (m, 1H), 1.79 (dd,  $J = 9.4, 6.2$  Hz, 1H), 1.75 – 1.73 (m, 1H), 1.67 (d,  $J = 7.2$  Hz, 3H), 1.59 (s, 1H), 1.48 (s, 1H), 1.22 – 1.20 (m, 1H), 1.18 (d,  $J = 3.9$  Hz, 3H), 1.11 (s, 3H), 1.10 – 1.06 (m, 1H), 0.88 (s, 3H).

**$^{13}C$  NMR** (126 MHz,  $CDCl_3$ )  $\delta$  158.7, 146.1, 141.1, 138.9, 137.8, 128.7, 128.4, 128.0, 127.1, 127.0, 127.0, 115.7, 90.2, 49.6, 49.1, 43.7, 41.4, 40.0, 30.5, 26.4, 25.9, 22.1, 20.5, 20.0.

**IR** (film):  $\nu$  ( $cm^{-1}$ ) 3426, 3081, 3000, 2832, 1611, 1589, 1407, 1342, 1310, 1166, 1017, 988, 800, 761, 724, 494.

**HRMS** (ESI-TOF,  $m/z$ ) calculated for  $C_{30}H_{35}O^+$   $[M+H]^+$  411.2682, found 411.2677.

**(1*S*,2*R*,4*S*)-2-(4-(1-([1,1'-biphenyl]-4-yl)ethyl)phenoxy)-1,7,7-trimethylbicyclo[2.2.1]heptane (97)**

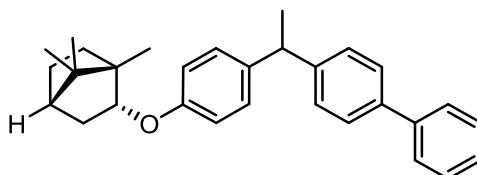

A Schlenk tube (10 mL) was charged with (1*S*,2*R*,4*S*)-1,7,7-trimethyl-2-phenoxybicyclo[2.2.1]heptane (**1zt**, 69.1 mg, 0.30 mmol), 4-ethylbiphenyl (**2a**, 164.0 mg, 0.90

mmol), FeCl<sub>3</sub>·6H<sub>2</sub>O (16.2 mg, 0.060 mmol) and (CHCl<sub>2</sub>)<sub>2</sub> (0.75 mL). The mixture was degassed *via* three freeze-pump-thaw cycles, then filled with dry air. The Schlenk tube was positioned approximately 5 cm away from a 50 W LED lamp ( $\lambda_{\text{max}}$  = 410 nm). After being stirred at 25 °C for 48 h, the reaction mixture was concentrated to dryness. Purification using silica gel column chromatography (elution with PE:DCM = 5:1) gave the pure product **97** as a colorless oil (81.2 mg, 0.198 mmol, 66% yield).

**<sup>1</sup>H NMR** (500 MHz, CDCl<sub>3</sub>)  $\delta$  7.61 (d, *J* = 7.5 Hz, 2H), 7.55 (d, *J* = 7.9 Hz, 2H), 7.45 (t, *J* = 7.7 Hz, 2H), 7.37 – 7.32 (m, 3H), 7.19 (d, *J* = 8.5 Hz, 2H), 6.83 (d, *J* = 8.6 Hz, 2H), 4.33 (d, *J* = 9.1 Hz, 1H), 4.18 (q, *J* = 7.2 Hz, 1H), 2.41 – 2.36 (m, 1H), 2.30 – 2.26 (m, 1H), 1.81 – 1.76 (m, 2H), 1.69 (d, *J* = 7.2 Hz, 3H), 1.39 – 1.34 (m, 1H), 1.31 – 1.27 (m, 1H), 1.16 (dd, *J* = 13.3, 1.6 Hz, 1H), 0.97 (s, 3H), 0.95 (d, *J* = 3.4 Hz, 6H).

**<sup>13</sup>C NMR** (126 MHz, CDCl<sub>3</sub>)  $\delta$  157.6, 146.2, 141.2, 139.0, 138.0, 128.8, 128.6, 128.1, 127.2, 127.1, 115.4, 82.9, 49.6, 47.7, 45.3, 43.8, 37.0, 28.1, 26.9, 22.2, 19.9, 19.1, 13.9.

**IR** (film):  $\nu$  (cm<sup>-1</sup>) 3426, 3081, 3000, 2832, 1611, 1589, 1407, 1342, 1310, 1166, 1017, 988, 800, 761, 724, 494.

**HRMS** (ESI-TOF, *m/z*) calculated for C<sub>30</sub>H<sub>35</sub>O<sup>+</sup> [M+H]<sup>+</sup> 411.2682, found 411.2680.

**(3*S*,8*R*,9*S*,10*S*,13*S*,14*S*)-3-(4-(1-([1,1'-biphenyl]-4-yl)ethyl)phenoxy)-10,13-dimethylhexadecahydro-17*H*-cyclopenta[*a*]phenanthren-17-one (**98**)**

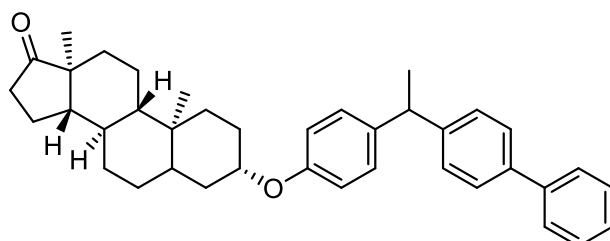

A Schlenk tube (10 mL) was charged with (3*S*,8*R*,9*S*,10*S*,13*S*,14*S*)-10,13-dimethyl-3-phenoxyhexadecahydro-17*H*-cyclopenta[*a*]phenanthren-17-one (**1zu**, 109.9 mg, 0.30 mmol), 4-ethylbiphenyl (**2a**, 164.0 mg, 0.90 mmol), FeCl<sub>3</sub>·6H<sub>2</sub>O (16.2 mg, 0.060 mmol) and (CHCl<sub>2</sub>)<sub>2</sub> (0.75 mL). The mixture was degassed *via* three freeze-pump-thaw cycles, then filled with dry air. The Schlenk tube was positioned approximately 5 cm away from a 50 W LED lamp ( $\lambda_{\text{max}}$  = 410 nm). After being stirred at 25 °C for 48 h, the reaction mixture was concentrated to dryness. Purification using silica gel column chromatography (elution with PE:DCM = 2:1) gave the pure product **98** as a colorless oil (57.4 mg, 0.105 mmol, 35% yield).

**<sup>1</sup>H NMR** (500 MHz, CDCl<sub>3</sub>)  $\delta$  7.58 – 7.56 (m, 2H), 7.52 (d, *J* = 8.3 Hz, 2H), 7.42 (t, *J* = 7.7 Hz, 2H), 7.34 – 7.31 (m, 1H), 7.30 – 7.28 (m, 2H), 7.17 – 7.14 (m, 2H), 6.84 (d, *J* = 8.6 Hz, 2H), 4.52 – 4.47 (m, 1H), 4.14 (d, *J* = 7.2 Hz, 1H), 2.44 (d, *J* = 10.4 Hz, 1H), 2.12 – 2.03 (m, 2H), 1.97 – 1.91 (m, 2H), 1.80 (ddd, *J* = 13.8, 7.1, 3.3 Hz, 3H), 1.65 (d, *J* = 7.2 Hz, 6H), 1.61 – 1.55 (m, 2H), 1.52 – 1.46 (m, 3H), 1.40 (d, *J* = 9.6 Hz, 1H), 1.27 (d, *J* = 5.2 Hz, 3H), 1.03 (d, *J* = 18.6 Hz, 2H), 0.87 (s, 3H), 0.85 (s, 3H).

**<sup>13</sup>C NMR** (126 MHz, CDCl<sub>3</sub>) δ 156.1, 146.0, 141.0, 138.8, 138.1, 128.7, 128.5, 128.0, 127.1, 127.0, 127.0, 115.9, 71.90 54.3, 51.5, 47.9, 43.7, 39.6, 36.0, 35.9, 35.1, 32.8, 32.7, 31.6, 30.8, 28.2, 25.7, 22.1, 21.8, 20.1, 13.9, 11.5.

**IR** (film): ν (cm<sup>-1</sup>) 3470, 2976, 2950, 2916, 2891, 2837, 1728, 1469, 1451, 1387, 1373, 1305, 1293, 1132, 1099, 1060, 1024, 1010, 901, 888, 614, 589.

**HRMS** (ESI-TOF, m/z) calculated for C<sub>39</sub>H<sub>47</sub>O<sub>2</sub><sup>+</sup> [M+H]<sup>+</sup> 547.3571, found 547.3579.

**2,2-difluoro-5-(4-(1-(4-methoxyphenyl)ethyl)phenoxy)benzo[d][1,3]dioxole (99)**

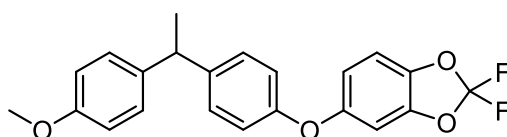

A Schlenk tube (10 mL) was charged with anisole (**1a**, 32.4 mg, 0.30 mmol), 5-(4-ethylphenoxy)-2,2-difluorobenzo[d][1,3]dioxole (**2zj**, 250.4 mg, 0.90 mmol), FeCl<sub>3</sub>·6H<sub>2</sub>O (16.2 mg, 0.060 mmol) and DCE (0.75 mL). The mixture was degassed *via* three freeze-pump-thaw cycles, then filled with dry air. The Schlenk tube was positioned approximately 5 cm away from a 50 W LED lamp (λ<sub>max</sub> = 410 nm). After being stirred at 25 °C for 48 h, the reaction mixture was concentrated to dryness. Purification using silica gel column chromatography (elution with PE:DCM = 5:1) gave the pure product **99** as a colorless oil (80.7 mg, 0.210 mmol, 70% yield).

**<sup>1</sup>H NMR** (500 MHz, CDCl<sub>3</sub>) δ 7.18 (d, *J* = 8.5 Hz, 2H), 7.14 (d, *J* = 8.5 Hz, 2H), 6.97 (d, *J* = 8.7 Hz, 1H), 6.90 (d, *J* = 8.6 Hz, 2H), 6.85 (d, *J* = 8.7 Hz, 2H), 6.81 – 6.63 (m, 2H), 4.10 (q, *J* = 7.2 Hz, 1H), 3.79 (s, 3H), 1.62 (d, *J* = 7.2 Hz, 3H).

**<sup>13</sup>C NMR** (126 MHz, CDCl<sub>3</sub>) δ 158.1, 155.3, 153.9, 144.4, 142.5, 139.6, 138.5, 129.0 (d, *J*<sub>C-F</sub> = 225.0 Hz), 118.7, 114.0, 113.4, 109.7, 102.0, 55.4, 43.5, 22.3.

**IR** (film): ν (cm<sup>-1</sup>) 3065, 3007, 2954, 2944, 2779, 1750, 1628, 1498, 1484, 1405, 1334, 1304, 1266, 1152, 1093, 1023, 882, 691, 533.

**HRMS** (ESI-TOF, m/z) calculated for C<sub>22</sub>H<sub>19</sub>F<sub>2</sub>O<sub>4</sub><sup>+</sup> [M+H]<sup>+</sup> 385.1246, found 385.1244.

**2-((5-bromo-2-methylphenyl)(4-methoxyphenyl)methyl)-5-(4-fluorophenyl)thiophene (100)**

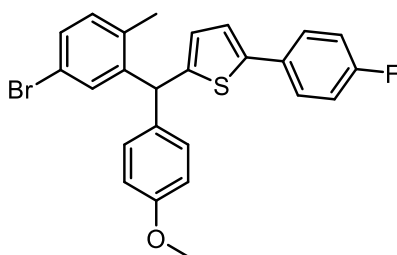

A Schlenk tube (10 mL) was charged with anisole (**1a**, 32.4 mg, 0.30 mmol), 2-(5-bromo-2-methylbenzyl)-5-(4-fluorophenyl)thiophene (**2zk**, 324.0 mg, 0.90 mmol), FeCl<sub>3</sub>·6H<sub>2</sub>O (16.2 mg, 0.060 mmol) and DCE (0.75 mL). The mixture was degassed *via* three freeze-pump-thaw cycles, then filled with dry air. The Schlenk tube was positioned approximately 5 cm away from a 50 W LED lamp ( $\lambda_{\text{max}}$  = 410 nm). After being stirred at 25 °C for 48 h, the reaction mixture was concentrated to dryness. Purification using silica gel column chromatography (elution with PE:DCM = 2:1) gave the pure product **100** as a colorless oil (81.1 mg, 0.174 mmol, 58% yield).

**<sup>1</sup>H NMR** (500 MHz, CDCl<sub>3</sub>)  $\delta$  7.50 (dd,  $J$  = 8.4, 5.4 Hz, 2H), 7.31 – 7.29 (m, 1H), 7.18 (s, 1H), 7.09 (d,  $J$  = 8.6 Hz, 2H), 7.08 (d,  $J$  = 3.7 Hz, 1H), 7.04 (d,  $J$  = 8.4 Hz, 3H), 6.87 (d,  $J$  = 8.5 Hz, 2H), 6.57 (d,  $J$  = 3.5 Hz, 1H), 5.70 (s, 1H), 3.81 (s, 3H), 2.23 (s, 3H).

**<sup>13</sup>C NMR** (126 MHz, CDCl<sub>3</sub>)  $\delta$  163.3, 161.4, 158.7, 146.8, 144.6, 142.6, 135.4, 134.3, 131.9 (d,  $J_{\text{C-F}}$  = 340.0 Hz), 130.8 (d,  $J_{\text{C-F}}$  = 10.0 Hz), 130.1, 130.0, 127.8, 127.3 (d,  $J_{\text{C-F}}$  = 30.0 Hz), 122.71, 119.97, 115.9 (d,  $J_{\text{C-F}}$  = 80.0 Hz), 114.1, 55.4, 48.0, 19.4.

**IR** (film):  $\nu$  (cm<sup>-1</sup>) 3937, 3828, 3087, 3077, 3055, 2920, 1942, 1769, 1687, 1579, 1526, 1555, 1251, 1034, 1000, 988, 903, 871, 831, 714, 519, 457, 447.

**HRMS** (ESI-TOF,  $m/z$ ) calculated for C<sub>25</sub>H<sub>20</sub>BrFNaOS<sup>+</sup> [M+Na]<sup>+</sup> 489.0294, found 489.0289.

## 2,4-dichloro-1-(4-chloro-2-(3-(4-methoxyphenyl)-3-phenylpropoxy)phenoxy)benzene (**101**)

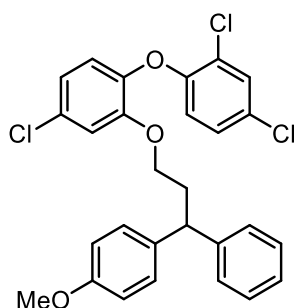

A Schlenk tube (10 mL) was charged with anisole (**1a**, 32.4 mg, 0.30 mmol), 2,4-dichloro-1-(4-chloro-2-(3-phenylpropoxy)phenoxy)benzene (**2zl**, 366.3 mg, 0.90 mmol), FeCl<sub>3</sub>·6H<sub>2</sub>O (16.2 mg, 0.060 mmol) and DCE (0.75 mL). The mixture was degassed *via* three freeze-pump-thaw cycles, then filled with dry air. The Schlenk tube was positioned approximately 5 cm away from a 50 W LED lamp ( $\lambda_{\text{max}}$  = 410 nm). After being stirred at 25 °C for 48 h, the reaction mixture was concentrated to dryness. Purification using silica gel column chromatography (elution with PE:DCM = 2:1) gave the pure product **101** as a colorless oil (61.4 mg, 0.120 mmol, 40% yield).

**<sup>1</sup>H NMR** (500 MHz, CDCl<sub>3</sub>)  $\delta$  7.44 (d,  $J$  = 2.5 Hz, 1H), 7.24 (s, 1H), 7.17 (d,  $J$  = 7.4 Hz, 1H), 7.11 (dd,  $J$  = 9.5, 6.4 Hz, 4H), 7.02 (dd,  $J$  = 10.3, 8.7 Hz, 3H), 6.91 (dd,  $J$  = 8.5, 2.3 Hz, 1H), 6.83 – 6.81 (m, 3H), 6.65 (d,  $J$  = 8.8 Hz, 1H), 3.86 (d,  $J$  = 6.3 Hz, 1H), 3.82 (t,  $J$  = 6.0 Hz, 2H),

3.77 (s, 3H), 2.30 (dd,  $J = 12.7, 6.4$  Hz, 2H).

**$^{13}\text{C}$  NMR** (126 MHz,  $\text{CDCl}_3$ )  $\delta$  158.2, 153.0, 151.0, 144.4, 142.9, 136.1, 130.9, 130.4, 129.9, 128.9, 128.7, 127.9, 127.7, 126.4, 124.4, 122.7, 121.1, 117.6, 114.7, 114.0, 66.8, 55.4, 45.9, 35.0.

**IR** (film):  $\nu$  ( $\text{cm}^{-1}$ ) 3245, 3001, 2987, 1612, 1573, 1499, 1450, 1249, 1200, 1081, 1035, 996, 869, 677, 547.

**HRMS** (ESI-TOF,  $m/z$ ) calculated for  $\text{C}_{28}\text{H}_{23}\text{Cl}_3\text{NaO}_3^+$   $[\text{M}+\text{Na}]^+$  535.0605, found 535.0611.

#### 4-(1,2,3,4-tetrahydronaphthalen-1-yl)phenol (**102**)

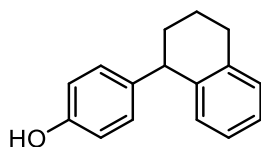

A Schlenk tube (10 mL) was charged phenol (**1p**, 28.2 mg, 0.30 mmol), 1,2,3,4-tetrahydronaphthalene (**2s**, 118.9 mg, 0.90 mmol),  $\text{FeCl}_3 \cdot 6\text{H}_2\text{O}$  (16.2 mg, 0.060 mmol) and  $\text{CHCl}_3$  (0.75 mL). The mixture was degassed *via* three freeze-pump-thaw cycles, then filled with dry air. The Schlenk tube was positioned approximately 5 cm away from a 50 W LED lamp ( $\lambda_{\text{max}} = 410$  nm). After being stirred at 25 °C for 48 h, the reaction mixture was concentrated to dryness. Purification using silica gel column chromatography (elution with PE:DCM = 2:1) gave the pure product **102** as a white solid (46.4 mg, 0.207 mmol, 69% yield).

**$^1\text{H}$  NMR** (500 MHz,  $\text{CDCl}_3$ )  $\delta$  7.14 (d,  $J = 6.1$  Hz, 2H), 7.06 (dd,  $J = 9.7, 4.2$  Hz, 1H), 6.98 (d,  $J = 8.4$  Hz, 2H), 6.87 (d,  $J = 7.8$  Hz, 1H), 6.76 (d,  $J = 8.5$  Hz, 2H), 4.87 (br, s, 1H), 4.08 (t,  $J = 6.5$  Hz, 1H), 2.93 – 2.89 (m, 1H), 2.87 (t,  $J = 5.9$  Hz, 1H), 2.17 – 2.13 (m, 1H), 1.91 – 1.85 (m, 2H), 1.80 – 1.76 (m, 1H).

**$^{13}\text{C}$  NMR** (126 MHz,  $\text{CDCl}_3$ )  $\delta$  153.8, 140.0, 139.8, 137.7, 130.2, 130.0, 129.1, 126.0, 125.7, 115.2, 44.9, 33.5, 29.9, 21.1.

**IR** (film):  $\nu$  ( $\text{cm}^{-1}$ ) 3101, 3075, 3044, 2853, 2838, 1579, 1557, 1431, 1341, 1238, 986, 824, 822, 690, 618.

**HRMS** (ESI-TOF,  $m/z$ ) calculated for  $\text{C}_{16}\text{H}_{17}\text{O}^+$   $[\text{M}+\text{H}]^+$  225.1274, found 225.1268.

#### ethyl 2-methyl-2-(4-(1,2,3,4-tetrahydronaphthalen-1-yl)phenoxy)propanoate (**104**)

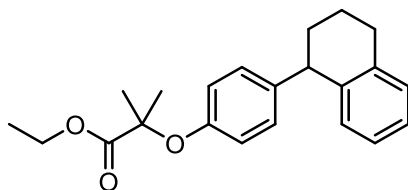

According to the reference, <sup>[7]</sup> a solution of 4-(1,2,3,4-tetrahydronaphthalen-1-yl)phenol (**102**,

64.0 mg, 0.28 mmol) in DMF (2.0 mL), MgSO<sub>4</sub> (35.0 mg, 0.29 mmol), K<sub>2</sub>CO<sub>3</sub> (157.0 mg, 1.12 mmol) and *tert*-butyl  $\alpha$ -bromoisobutyrate (**103**, 266  $\mu$ L, 1.4 mmol) were added and the reaction was stirred at 100 °C for 24 h. After that time, the reaction was quenched with water (30 mL) and extracted three times with ethyl acetate (3  $\times$  20 mL). The combined organic layers were dried over MgSO<sub>4</sub>, the solvent was removed under reduced pressure. Purification using silica gel column chromatography (elution with PE:EtOAc = 5:1) gave the pure product **104** as a colorless oil (92.9 mg, 0.275 mmol, 98% yield).

**<sup>1</sup>H NMR** (500 MHz, CDCl<sub>3</sub>)  $\delta$  7.13 – 7.09 (m, 2H), 7.04 – 7.00 (m, 1H), 6.96 – 6.92 (m, 2H), 6.83 (d,  $J$  = 7.7 Hz, 1H), 6.77 – 6.73 (m, 2H), 4.23 (q,  $J$  = 7.1 Hz, 2H), 4.05 (t,  $J$  = 6.7 Hz, 1H), 2.93 – 2.78 (m, 2H), 2.17 – 2.07 (m, 1H), 1.88 – 1.73 (m, 3H), 1.58 (s, 6H), 1.24 (t,  $J$  = 7.1 Hz, 3H).

**<sup>13</sup>C NMR** (126 MHz, CDCl<sub>3</sub>)  $\delta$  173.4, 152.5, 140.1, 138.6, 136.5, 129.1, 128.3, 127.9, 124.8, 124.5, 118.0, 78.0, 60.3, 43.8, 32.2, 28.7, 24.4, 19.9, 13.0.

**HRMS** (ESI-TOF,  $m/z$ ) calculated for C<sub>22</sub>H<sub>26</sub>NaO<sub>3</sub><sup>+</sup> [M+Na]<sup>+</sup> 361.1774, found 361.1769.

#### 4-(1-(4-chlorophenyl)ethyl)phenol (**105**)

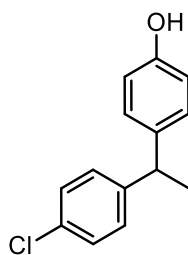

A Schlenk tube (10 mL) was charged phenol (**1p**, 28.2 mg, 0.30 mmol), 1-chloro-4-ethylbenzene (**2e**, 126.5 mg, 0.90 mmol), FeCl<sub>3</sub>·6H<sub>2</sub>O (16.2 mg, 0.060 mmol) and CHCl<sub>3</sub> (0.75 mL). The mixture was degassed *via* three freeze-pump-thaw cycles, then filled with dry air. The Schlenk tube was positioned approximately 5 cm away from a 50 W LED lamp ( $\lambda_{\text{max}}$  = 410 nm). After being stirred at 25 °C for 48 h, the reaction mixture was concentrated to dryness. Purification using silica gel column chromatography (elution with PE:DCM = 2:1) gave the pure product **105** as a colorless oil (43.2 mg, 0.186 mmol, 62% yield).

**<sup>1</sup>H NMR** (500 MHz, CDCl<sub>3</sub>)  $\delta$  7.28 (d,  $J$  = 4.9 Hz, 2H), 7.15 (d,  $J$  = 8.4 Hz, 2H), 7.08 (d,  $J$  = 8.4 Hz, 2H), 6.80 – 6.77 (m, 2H), 4.83 (br, s, 1H), 4.09 (q,  $J$  = 7.2 Hz, 1H), 1.61 (d,  $J$  = 7.2 Hz, 3H).

**<sup>13</sup>C NMR** (126 MHz, CDCl<sub>3</sub>)  $\delta$  153.9, 145.3, 138.2, 131.7, 128.9, 128.7, 128.4, 115.3, 43.4, 22.0.

**IR** (film):  $\nu$  (cm<sup>-1</sup>) 3234, 3221, 3200, 2945, 2939, 1758, 1622, 1501, 1285, 1229, 1100, 832, 604, 535, 498, 478.

**HRMS** (ESI-TOF,  $m/z$ ) calculated for C<sub>14</sub>H<sub>14</sub>ClO<sup>+</sup> [M+H]<sup>+</sup> 233.0728, found 233.0720.

### ethyl 2-(4-(1-(4-chlorophenyl)ethyl)phenoxy)-2-methylpropanoate (**106**)

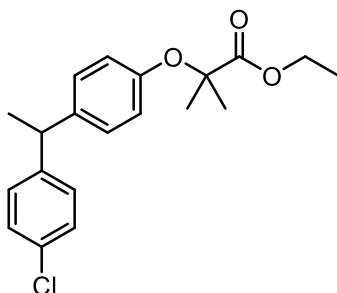

According to the published procedure,<sup>[7]</sup> a solution of 4-(1-(4-chlorophenyl)ethyl)phenol (**103**, 65.0 mg, 0.28 mmol) in DMF (2.0 mL), MgSO<sub>4</sub> (35.0 mg, 0.29 mmol), K<sub>2</sub>CO<sub>3</sub> (157.0 mg, 1.12 mmol) and *tert*-butyl  $\alpha$ -bromoisobutyrate (**101**, 266  $\mu$ L, 1.4 mmol) were added and the reaction was stirred at 100 °C for 24 h. After that time, the reaction was quenched with water (30 mL) and extracted three times with ethyl acetate (3  $\times$  20 mL). The combined organic layers were dried over MgSO<sub>4</sub>, the solvent was removed under reduced pressure. Purification using silica gel column chromatography (elution with PE:EtOAc = 5:1) gave the pure product **106** as a colorless oil (74.6 mg, 0.216 mmol, 77% yield).

**<sup>1</sup>H NMR** (500 MHz, CDCl<sub>3</sub>)  $\delta$  7.25 – 7.21 (m, 2H), 7.11 (d,  $J$  = 8.4 Hz, 2H), 7.04 (d,  $J$  = 8.6 Hz, 2H), 6.78 – 6.74 (m, 2H), 4.22 (q,  $J$  = 7.1 Hz, 2H), 4.05 (q,  $J$  = 7.2 Hz, 1H), 1.58 – 1.56 (m, 9H), 1.24 (t,  $J$  = 7.1 Hz, 3H).

**<sup>13</sup>C NMR** (126 MHz, CDCl<sub>3</sub>)  $\delta$  174.3, 153.7, 145.1, 139.4, 131.7, 128.9, 128.4, 128.1, 119.2, 79.1, 61.4, 43.4, 25.4, 25.4, 22.0, 14.1.

**MS** (ESI) mass calculated for C<sub>20</sub>H<sub>23</sub>ClNaO<sub>3</sub><sup>+</sup> [M+Na]<sup>+</sup> 369.1228, found 369.1232.

### 3-cyclohexyl-4-methoxy-1*H*-indole (**107**)

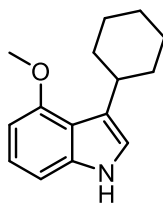

A Schlenk tube (10 mL) was charged with 4-methoxyindole (**1zv**, 44.2 mg, 0.30 mmol), cyclohexane (**2zg**, 0.75 mL) and FeBr<sub>3</sub> (32.5 mg, 0.11 mmol). The mixture was degassed *via* three freeze-pump-thaw cycles, then filled with dry air. The Schlenk tube was positioned approximately 5 cm away from a 40 W LED lamp ( $\lambda_{\text{max}}$  = 370 nm). After being stirred at 25 °C for 120 h, the reaction mixture was concentrated to dryness. Purification using silica gel column chromatography (elution with PE:DCM = 2:1) gave the pure product **107** as a white solid (26.1 mg, 0.114 mmol, 38% yield).

**<sup>1</sup>H NMR** (500 MHz, CDCl<sub>3</sub>)  $\delta$  7.81 (s, 1H), 7.07 (t,  $J$  = 7.9 Hz, 1H), 6.93 (d,  $J$  = 8.1 Hz, 1H),

6.81 (d,  $J = 2.1$  Hz, 1H), 6.48 (d,  $J = 7.8$  Hz, 1H), 3.92 (s, 3H), 3.12 (tt,  $J = 11.6, 3.1$  Hz, 1H), 2.17 – 2.12 (m, 2H), 1.84 (dd,  $J = 9.7, 6.5$  Hz, 2H), 1.79 – 1.74 (m, 1H), 1.47 (qd,  $J = 9.7, 6.4$  Hz, 2H), 1.38 – 1.32 (m, 2H), 1.27 (dt,  $J = 12.8, 3.7$  Hz, 1H).

**$^{13}\text{C}$  NMR** (126 MHz,  $\text{CDCl}_3$ )  $\delta$  154.9, 138.0, 124.3, 122.5, 117.9, 116.9, 104.4, 99.4, 55.2, 36.3, 34.9, 27.1, 26.7.

**IR** (film):  $\nu$  ( $\text{cm}^{-1}$ ) 3924, 3101, 2061, 3056, 3001, 2900, 2886, 2812, 2566, 1958, 1950, 1403, 1397, 1343, 1303, 990, 876, 755, 693.

**HRMS** (ESI-TOF,  $m/z$ ) calculated for  $\text{C}_{15}\text{H}_{20}\text{NO}^+$   $[\text{M}+\text{H}]^+$  230.1539, found 230.1541.

### 3-cyclohexyl-1-(3-fluoro-4-methylphenyl)-4-methoxy-1H-indole (**109**)

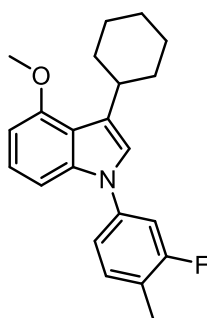

According to the published procedure,<sup>[8]</sup> an oven dried two-necked round bottom flask was charged with 2-fluoro-4-iodo-1-methylbenzene (**108**, 236.0 mg, 1.0 mmol), Cu-NP (101.7 mg, 1.6 mmol) and  $\text{K}_3\text{PO}_4$  (424.5 mg, 2.0 mmol), evacuated and backfilled with an argon atmosphere. 3-cyclohexyl-4-methoxy-1H-indole (**107**, 229.2 mg, 1.0 mmol) and DMSO (2.0 mL) were added under argon. The flask was then immersed in a preheated oil bath at 80 °C until the conversion was completed. The cooled mixture was partitioned between EtOAc (10 mL) and saturated  $\text{NH}_4\text{Cl}$  (10 mL). The aqueous layer was extracted with EtOAc ( $2 \times 10$  mL), the organic layer was washed with brine (20 mL), dried over anhydrous  $\text{Na}_2\text{SO}_4$  and concentrated in vacuum. Purification using silica gel column chromatography (elution with PE:EtOAc = 1:1) gave the pure product **109** as a white solid (276.3 mg, 0.819 mmol, 82% yield).

**$^1\text{H}$  NMR** (500 MHz,  $\text{CDCl}_3$ )  $\delta$  7.29 – 7.27 (m, 1H), 7.24 (dd,  $J = 7.9, 3.7$  Hz, 1H), 7.12 – 7.08 (m, 2H), 7.04 (d,  $J = 8.2$  Hz, 1H), 6.90 (s, 1H), 6.54 (d,  $J = 7.6$  Hz, 1H), 3.95 (s, 3H), 3.17 (tt,  $J = 11.5, 2.9$  Hz, 1H), 2.34 (s, 3H), 2.18 (d,  $J = 12.1$  Hz, 2H), 1.84 (d,  $J = 13.0$  Hz, 2H), 1.77 (d,  $J = 12.8$  Hz, 1H), 1.48 (tdd,  $J = 12.8, 9.7, 3.1$  Hz, 2H), 1.41 – 1.34 (m, 2H), 1.30 – 1.26 (m, 1H).

**$^{13}\text{C}$  NMR** (126 MHz,  $\text{CDCl}_3$ )  $\delta$  155.1, 138.0, 136.1, 127.6 (d,  $J_{\text{C-F}} = 25.0$  Hz), 126.3, 126.1, 125.2, 123.5 (d,  $J_{\text{C-F}} = 35.0$  Hz), 123.0, 122.4, 118.2, 115.9 (d,  $J_{\text{C-F}} = 95.0$  Hz), 103.6, 100.2, 55.4, 36.4, 35.0, 27.2, 26.8, 14.8.

**HRMS** (ESI-TOF,  $m/z$ ) calculated for  $\text{C}_{22}\text{H}_{25}\text{FNO}^+$   $[\text{M}+\text{H}]^+$  338.1915, found 338.1919.

### 3.3 A Scale-up Reaction

#### 3-cyclohexyl-4-methoxy-1*H*-indole (**107**)

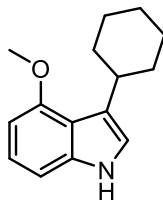

A Schlenk tube (10 mL) was charged with 4-methoxyindole (**1zv**, 839.8 mg, 5.7 mmol), cyclohexane (**2zg**, 20 mL) and FeBr<sub>3</sub> (591.0 mg, 0.11 mmol). The mixture was degassed *via* three freeze-pump-thaw cycles, then filled with dry air. The Schlenk tube was positioned approximately 5 cm away from a 40 W LED lamp ( $\lambda_{\text{max}} = 370$  nm). After being stirred at 25 °C for 120 h, the reaction mixture was concentrated to dryness. Purification using silica gel column chromatography (elution with PE:DCM = 2:1) gave the pure product **107** as a white solid (444.1 mg, 1.938 mmol, 34% yield).

## 4. Mechanistic Investigations

### 4.1 Radical Probing Experiments

#### 4.1.1 Probing Benzyl Radicals

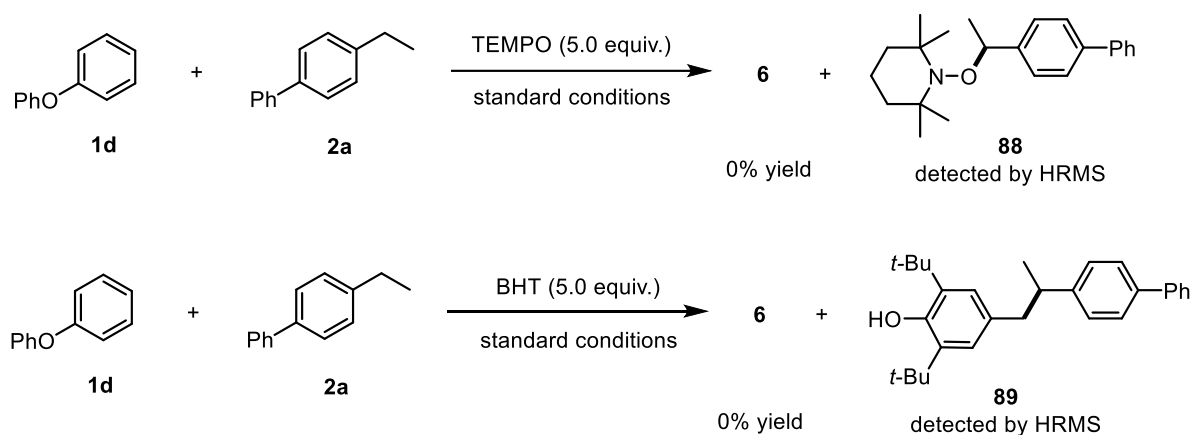

A Schlenk tube (10 mL) was charged with diphenyl ether (**1d**, 51.1 mg, 0.30 mmol), 4-ethylbiphenyl (**2a**, 164.0 mg, 0.90 mmol),  $\text{FeCl}_3 \cdot 6\text{H}_2\text{O}$  (16.2 mg, 0.060 mmol) and  $(\text{CHCl}_2)_2$  (0.75 mL). 2,2,6,6-Tetramethylpiperidine-1-oxyl (TEMPO, 234.5 mg, 1.50 mmol) or butylated hydroxytoluene (BHT, 330.5 mg, 1.50 mmol) was then added. The mixture was degassed *via* three freeze-pump-thaw cycles, and filled with dry air. The Schlenk tube was positioned approximately 5 cm away from a 50 W LED lamp ( $\lambda_{\text{max}} = 410 \text{ nm}$ ). After being stirred at 25 °C for 1 h, the reaction mixture was detected by HRMS.

For compound **88**, HRMS (ESI-TOF,  $m/z$ ): calculated for  $\text{C}_{23}\text{H}_{32}\text{NO}^+$  ( $\text{M}+\text{H}^+$ ): 338.2478, found: 338.2480. For compound **89**, HRMS (ESI-TOF,  $m/z$ ): calculated for  $\text{C}_{29}\text{H}_{37}\text{O}^+$  ( $\text{M}+\text{H}^+$ ): 401.2839, found: 401.2829.

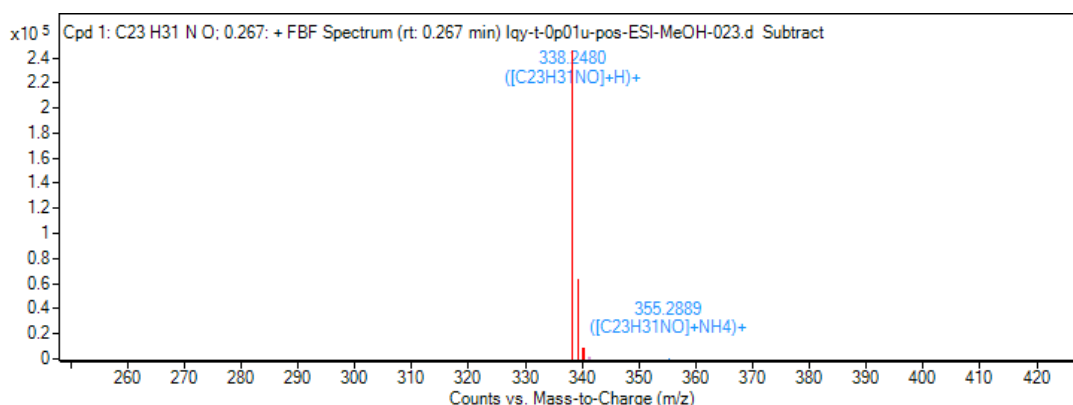

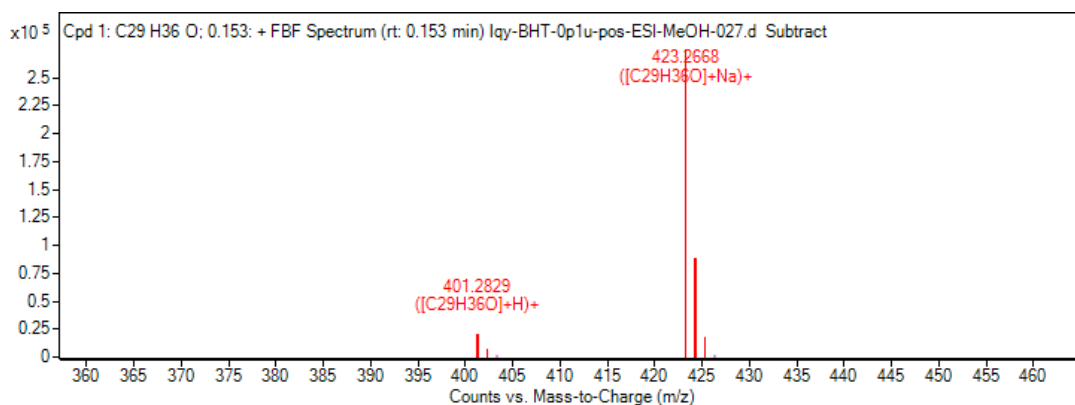

#### 4.1.2 Probing Chlorine Radicals

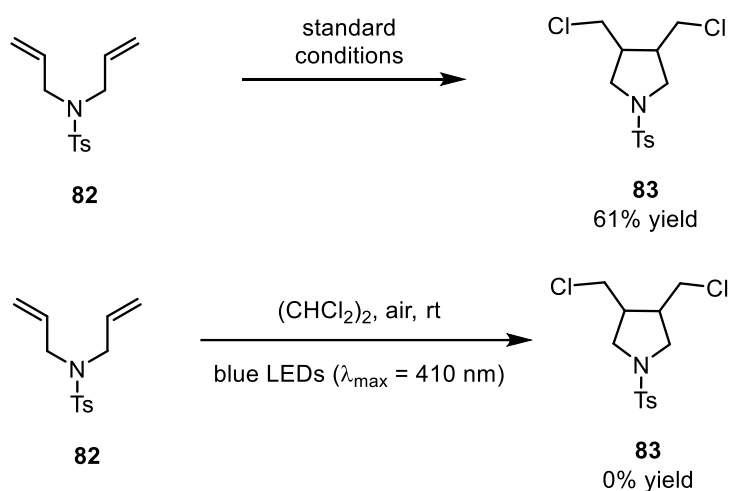

A Schlenk tube (10 mL) was charged with *N,N*-diallyl-4-methylbenzenesulfonamide (**82**, 75.3 mg, 0.30 mmol),  $\text{FeCl}_3 \cdot 6\text{H}_2\text{O}$  (16.2 mg, 0.060 mmol) and  $(\text{CHCl}_2)_2$  (0.75 mL). The mixture was degassed *via* three freeze-pump-thaw cycles, then filled with dry air. The Schlenk tube was positioned approximately 5 cm away from a 50 W LED lamp ( $\lambda_{\text{max}} = 410 \text{ nm}$ ). After being stirred at 25 °C for 48 h, the reaction mixture was concentrated to dryness. Purification using silica gel column chromatography (elution with PE:EtOAc = 3:1) gave the pure product **83** as a white solid (58.8 mg, 0.183 mmol, 61% yield).

#### 3,4-bis(chloromethyl)-1-tosylpyrrolidine (**83**)

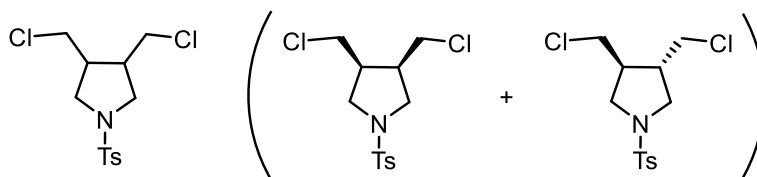

**<sup>1</sup>H NMR** (500 MHz, CDCl<sub>3</sub>) δ 7.71 (t, *J* = 8.7 Hz, 2H), 7.34 (d, *J* = 8.0 Hz, 2H), 3.50 – 3.43 (m, 4H), 3.31 – 3.24 (m, 3H), 3.12 (dd, *J* = 10.3, 6.1 Hz, 1H), 2.64 – 2.60 (m, 1H), 2.43 (s, 3H), 2.42 – 2.34 (m, 1H).

**<sup>13</sup>C NMR** (126 MHz, CDCl<sub>3</sub>) δ 144.1, 144.0, 133.5, 132.7, 129.9, 129.9, 127.9, 127.6, 51.2, 50.7, 45.3, 43.9, 43.3, 42.0, 21.7, 21.7.

**HRMS** (ESI-TOF, *m/z*) calculated for C<sub>13</sub>H<sub>18</sub>Cl<sub>2</sub>NO<sub>2</sub>S<sup>+</sup> [M+H]<sup>+</sup> 322.0430, found 322.0433.

**Remarks:** In the absence of FeCl<sub>3</sub>·6H<sub>2</sub>O, compound **83** was not detected, indicating that chlorine radicals derived from the iron salt rather than the solvent.

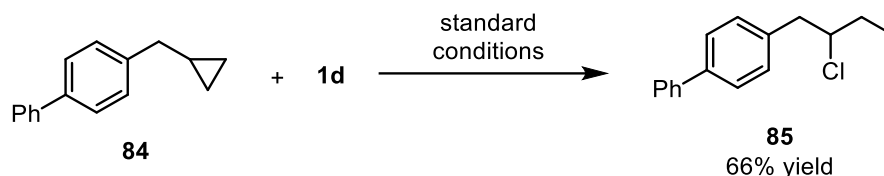

A Schlenk tube (10 mL) was charged with diphenyl ether (**1d**, 51.1 mg, 0.30 mmol), 4-(cyclopropylmethyl)-1,1'-biphenyl (**84**, 187.5 mg, 0.90 mmol), FeCl<sub>3</sub>·6H<sub>2</sub>O (16.2 mg, 0.060 mmol) and (CHCl<sub>2</sub>)<sub>2</sub> (0.75 mL). The mixture was degassed *via* three freeze-pump-thaw cycles, then filled with dry air. The Schlenk tube was positioned approximately 5 cm away from a 50 W LED lamp ( $\lambda_{\text{max}}$  = 410 nm). After being stirred at 25 °C for 48 h, the reaction mixture was concentrated to dryness. Purification using silica gel column chromatography (elution with PE:DCM = 5:1) gave the pure product **85** as a white solid (48.3 mg, 0.198 mmol, 66% yield).

#### 4-(2-chlorobutyl)-1,1'-biphenyl (**85**)

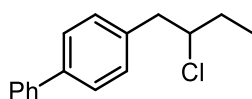

**<sup>1</sup>H NMR** (500 MHz, CDCl<sub>3</sub>) δ 7.63 – 7.58 (m, 2H), 7.56 (d, *J* = 8.1 Hz, 2H), 7.45 (t, *J* = 7.6 Hz, 2H), 7.39 – 7.27 (m, 3H), 4.16 – 4.04 (m, 1H), 3.10 (d, *J* = 6.9 Hz, 2H), 1.91 (dtd, *J* = 14.4, 7.2, 3.3 Hz, 1H), 1.74 (dt, *J* = 15.2, 7.6 Hz, 1H), 1.10 (t, *J* = 7.3 Hz, 3H).

**<sup>13</sup>C NMR** (126 MHz, CDCl<sub>3</sub>) δ 141.0, 139.8, 137.3, 129.9, 128.9, 127.3, 127.3, 127.2, 65.7, 44.41, 30.86, 11.08.

**HRMS** (ESI-TOF, *m/z*) calculated for C<sub>16</sub>H<sub>18</sub>Cl<sup>+</sup> [M+H]<sup>+</sup> 245.1092, found 245.1097.

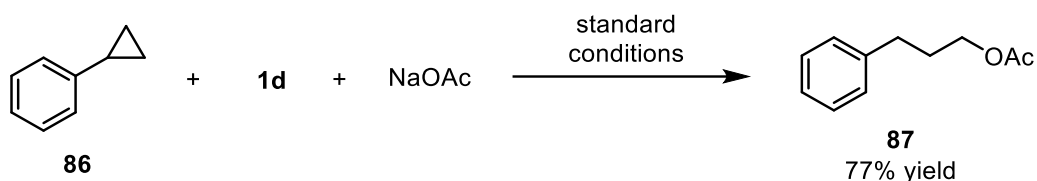

A Schlenk tube (10 mL) was charged with diphenyl ether (**1d**, 51.1 mg, 0.30 mmol), cyclopropylbenzene (**86**, 106.3 mg, 0.90 mmol),  $\text{FeCl}_3 \cdot 6\text{H}_2\text{O}$  (16.2 mg, 0.060 mmol) and  $(\text{CHCl}_2)_2$  (0.75 mL). NaOAc (204.1 mg, 1.5 mmol) was then added. The mixture was degassed *via* three freeze-pump-thaw cycles, then filled with dry air. The Schlenk tube was positioned approximately 5 cm away from a 50 W LED lamp ( $\lambda_{\text{max}} = 410 \text{ nm}$ ). After being stirred at 25 °C for 48 h, the reaction mixture was concentrated to dryness. Purification using silica gel column chromatography (elution with PE:DCM = 3:1) gave the pure product **87** as a colorless oil (41.1 mg, 0.231 mmol, 77% yield).

### 3-phenylpropyl acetate (**87**)

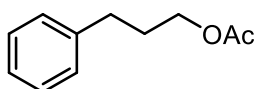

**$^1\text{H}$  NMR** (500 MHz,  $\text{CDCl}_3$ )  $\delta$  7.33 – 7.29 (m, 2H), 7.24 – 7.20 (m, 2H), 7.20 (s, 1H), 4.11 (t,  $J = 6.6 \text{ Hz}$ , 2H), 2.73 – 2.69 (m, 2H), 2.06 (s, 3H), 1.98 (ddt,  $J = 13.1, 9.1, 6.5 \text{ Hz}$ , 2H).

**$^{13}\text{C}$  NMR** (126 MHz,  $\text{CDCl}_3$ )  $\delta$  171.1, 141.2, 128.5, 128.4, 126.0, 63.9, 32.2, 30.2, 21.0.

**HRMS** (ESI-TOF,  $m/z$ ) calculated for  $\text{C}_{11}\text{H}_{15}\text{O}_2^+$   $[\text{M}+\text{H}]^+$  179.2385, found 179.2389.

### 4.2 Light-Off/on Experiments

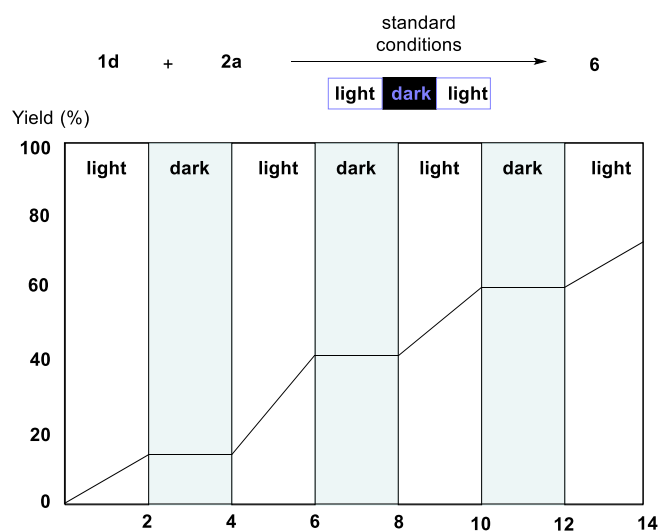

**Supplementary Figure 1.** Light-off/on experiments

A Schlenk tube (10 mL) was charged with diphenyl ether (**1d**, 51.1 mg, 0.30 mmol), 4-ethylbiphenyl (**2a**, 164.0 mg, 0.90 mmol), FeCl<sub>3</sub>·6H<sub>2</sub>O (16.2 mg, 0.060 mmol) and (CHCl<sub>2</sub>)<sub>2</sub> (0.75 mL). The mixture was degassed *via* three freeze-pump-thaw cycles, then filled with dry air. The Schlenk tube was positioned approximately 5 cm away from a 50 W LED lamp ( $\lambda_{\text{max}}$  = 410 nm). The reaction was stirred at room temperature for the indicated time. A solution (0.10 mL) was taken from the reaction mixture, and the yields were determined by crude <sup>1</sup>H NMR analysis using 1,3,5-trimethoxybenzene as an internal standard.

### 4.3 XPS Spectroscopy

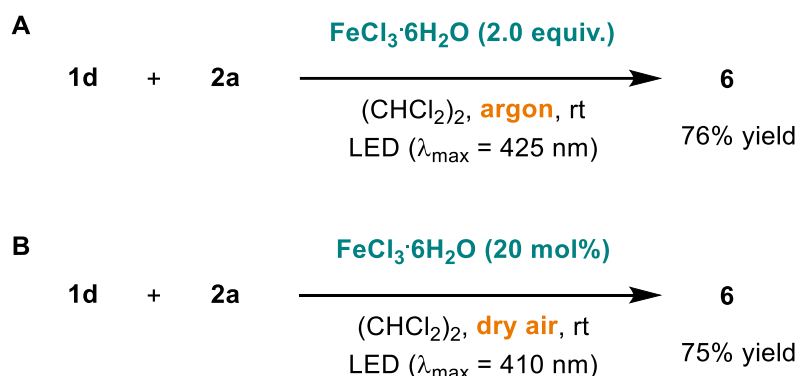

**Sample A** (a residue derived from the reaction in argon): A Schlenk tube (10 mL) was charged with diphenyl ether (**1d**, 51.1 mg, 0.30 mmol), 4-ethylbiphenyl (**2a**, 164.0 mg, 0.90 mmol), FeCl<sub>3</sub>·6H<sub>2</sub>O (16.2 mg, 0.060 mmol) and (CHCl<sub>2</sub>)<sub>2</sub> (0.75 mL). The mixture was degassed *via* three freeze-pump-thaw cycles, then filled with argon. The Schlenk tube was positioned approximately 5 cm away from a 50 W LED lamp ( $\lambda_{\text{max}}$  = 425 nm). After being stirred at 25 °C for 48 h, the reaction mixture was filtered in argon and the residue was used for the X-ray photoelectron spectroscopy (XPS) analysis.

**Sample B** (a residue derived from the reaction in dry air): A Schlenk tube (10 mL) was charged with diphenyl ether (**1d**, 51.1 mg, 0.30 mmol), 4-ethylbiphenyl (**2a**, 164.0 mg, 0.90 mmol), FeCl<sub>3</sub>·6H<sub>2</sub>O (16.2 mg, 0.060 mmol) and (CHCl<sub>2</sub>)<sub>2</sub> (0.75 mL). The mixture was degassed *via* three freeze-pump-thaw cycles, then filled with dry air. The Schlenk tube was positioned approximately 5 cm away from a 50 W LED lamp ( $\lambda_{\text{max}}$  = 410 nm). After being stirred at 25 °C for 48 h, the reaction mixture was filtered in argon and the residue was used for the XPS analysis.

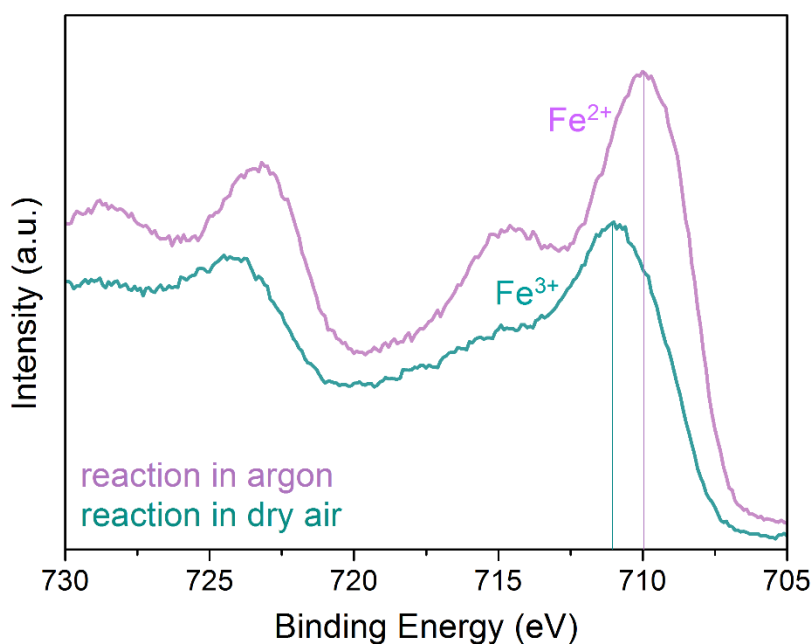

**Supplementary Figure 2.** XPS analysis of reaction residues

#### 4.4 UV/Vis-Absorption Spectra of the Reaction Components

Preparation of samples for the measurement of UV-Vis spectra:

**2-Ethylbenzene 2a in (CHCl<sub>2</sub>)<sub>2</sub> (1.0×10<sup>-4</sup> M):** 2-ethylbenzene **2a** was dissolved in distilled (CHCl<sub>2</sub>)<sub>2</sub> (10 mL).

**Diphenyl ether 1d in (CHCl<sub>2</sub>)<sub>2</sub> (1.0×10<sup>-4</sup> M):** diphenyl ether **1d** was dissolved in distilled (CHCl<sub>2</sub>)<sub>2</sub> (10 mL).

**FeCl<sub>3</sub>·6H<sub>2</sub>O in (CHCl<sub>2</sub>)<sub>2</sub> (1.0×10<sup>-4</sup> M):** FeCl<sub>3</sub>·6H<sub>2</sub>O was dissolved in distilled (CHCl<sub>2</sub>)<sub>2</sub> (10 mL).

**2-Ethylbenzene 2a + FeCl<sub>3</sub>·6H<sub>2</sub>O in (CHCl<sub>2</sub>)<sub>2</sub> (1.0×10<sup>-4</sup> M):** 2-ethylbenzene **2a** and FeCl<sub>3</sub>·6H<sub>2</sub>O were dissolved in distilled (CHCl<sub>2</sub>)<sub>2</sub> (10 mL).

**Diphenyl ether 1d + FeCl<sub>3</sub>·6H<sub>2</sub>O in (CHCl<sub>2</sub>)<sub>2</sub> (1.0×10<sup>-4</sup> M):** diphenyl ether **1d** and FeCl<sub>3</sub>·6H<sub>2</sub>O were dissolved in distilled (CHCl<sub>2</sub>)<sub>2</sub> (10 mL).

**2-Ethylbenzene 2a + diphenyl ether 1d + FeCl<sub>3</sub>·6H<sub>2</sub>O in (CHCl<sub>2</sub>)<sub>2</sub> (1.0×10<sup>-4</sup> M):** 2-ethylbenzene **2a**, diphenyl ether **1d** and FeCl<sub>3</sub>·6H<sub>2</sub>O were dissolved in distilled (CHCl<sub>2</sub>)<sub>2</sub> (10 mL).

**Product 6 in (CHCl<sub>2</sub>)<sub>2</sub> (1.0×10<sup>-4</sup> M):** product **6** was dissolved in distilled (CHCl<sub>2</sub>)<sub>2</sub> (10 mL).

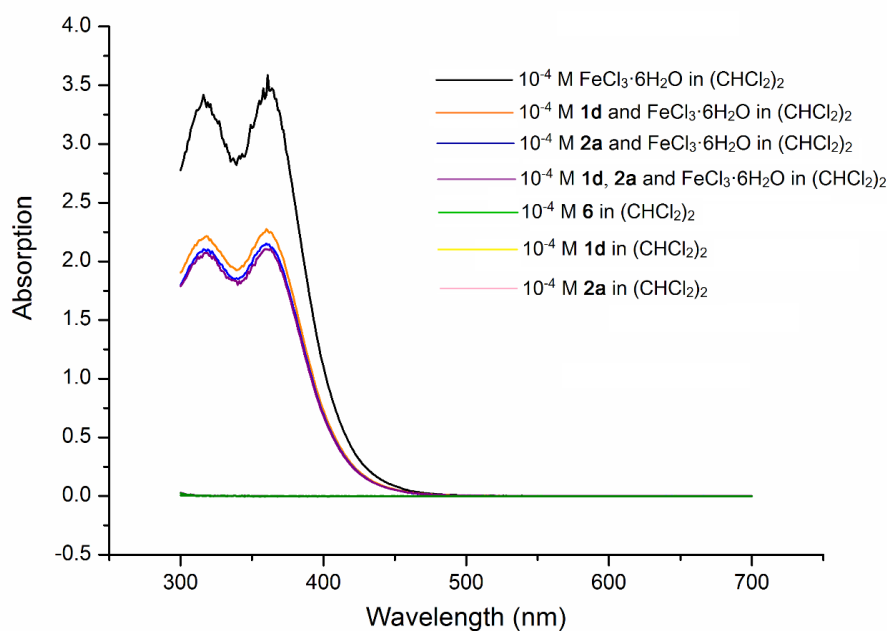

**Supplementary Figure 3.** UV-Vis spectra of the reaction components

#### 4.5 Reaction Interfered with Competitive Nucleophiles

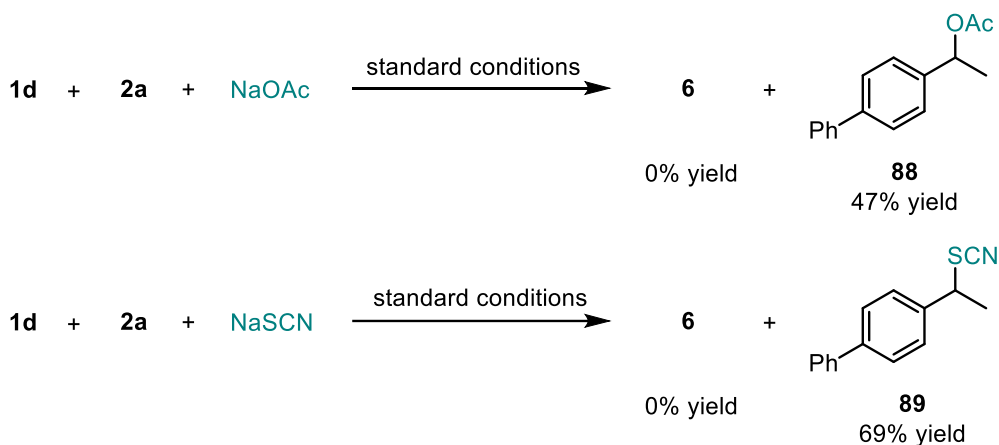

A Schlenk tube (10 mL) was charged with diphenyl ether (**1d**, 51.1 mg, 0.30 mmol), 4-ethylbiphenyl (**2a**, 164.0 mg, 0.90 mmol), FeCl<sub>3</sub>·6H<sub>2</sub>O (16.2 mg, 0.060 mmol) and (CHCl<sub>2</sub>)<sub>2</sub> (0.75 mL). Then NaOAc (204.1 mg, 1.5 mmol) or NaSCN (121.5 mg, 1.5 mmol) was added. The mixture was degassed *via* three freeze-pump-thaw cycles, then filled with dry air. The Schlenk tube was positioned approximately 5 cm away from a 50 W LED lamp ( $\lambda_{\text{max}} = 410$  nm). After being stirred at 25 °C for 36 h, the reaction mixture was concentrated to dryness. Purification using silica gel column chromatography (elution with PE:EtOAc = 5:1) gave the pure product **88** as a colorless oil (33.9 mg, 0.141 mmol, 47% yield), or **89** as a white solid (49.5 mg, 0.207 mmol, 69% yield).

#### 1-([1,1'-biphenyl]-4-yl)ethyl acetate (**88**)

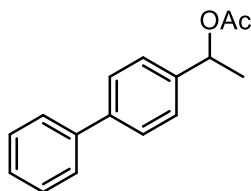

**<sup>1</sup>H NMR** (500 MHz, CDCl<sub>3</sub>) δ 7.57 (d, *J* = 7.9 Hz, 4H), 7.44 (t, *J* = 7.6 Hz, 4H), 7.35 (t, *J* = 7.4 Hz, 1H), 5.93 (q, *J* = 6.6 Hz, 1H), 2.09 (s, 3H), 1.57 (d, *J* = 4.0 Hz, 3H).

**<sup>13</sup>C NMR** (126 MHz, CDCl<sub>3</sub>) δ 170.5, 141.3, 140.9, 140.8, 128.9, 127.5, 127.4, 127.3, 126.7, 72.3, 22.3, 21.5.

**HRMS** (ESI-TOF, *m/z*) calculated for C<sub>16</sub>H<sub>16</sub>NaO<sub>2</sub><sup>+</sup> [*M*+Na]<sup>+</sup> 263.1043, found 263.1049.

#### 4-(1-thiocyanatoethyl)-1,1'-biphenyl (**89**)

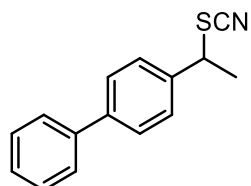

**<sup>1</sup>H NMR** (500 MHz, CDCl<sub>3</sub>) δ 7.61 – 7.56 (m, 4H), 7.44 (t, *J* = 7.6 Hz, 2H), 7.40 – 7.34 (m, 3H), 4.95 (q, *J* = 6.8 Hz, 1H), 1.70 (d, *J* = 6.8 Hz, 3H).

**<sup>13</sup>C NMR** (126 MHz, CDCl<sub>3</sub>) δ 141.4, 140.5, 139.3, 129.0, 127.8, 127.7, 127.2, 126.0, 56.9, 25.1.

**HRMS** (ESI-TOF, *m/z*) calculated for C<sub>15</sub>H<sub>13</sub>NNaS<sup>+</sup> [*M*+Na]<sup>+</sup> 262.0661, found 262.0666.

#### 4.6 Kinetic Isotope Effect (KIE) Experiments

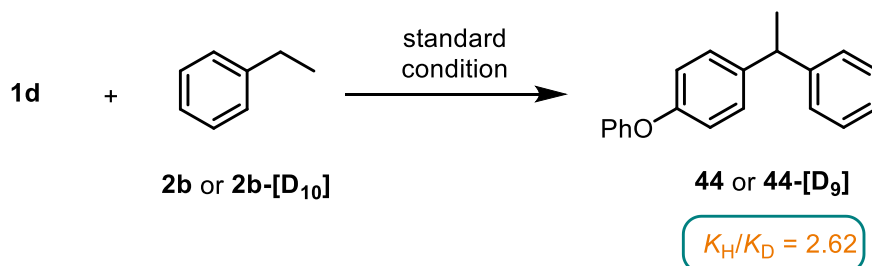

A Schlenk tube (10 mL) was charged with diphenyl ether (**1d**, 51.1 mg, 0.30 mmol), ethylbenzene (**2b**, 95.6 mg, 1.0 mmol) or ethylbenzene-[D<sub>10</sub>] (**2b-[D<sub>10</sub>]**, 104.4 mg, 1.0 mmol), FeCl<sub>3</sub>·6H<sub>2</sub>O (16.2 mg, 0.060 mmol) and (CHCl<sub>2</sub>)<sub>2</sub> (0.75 mL). The mixture was degassed *via* three freeze-pump-thaw cycles, then filled with dry air. The Schlenk tube was positioned approximately 5 cm away from a 50 W LED lamp ( $\lambda_{\text{max}}$  = 410 nm). The reaction was stirred at

room temperature for the indicated time. The reaction mixture of hydrogen to deuterium in the product was determined as 2.62:1, thus the KIE value was  $K_H/K_D = 2.62$ .

#### 4.7 Probing Other Intermediates

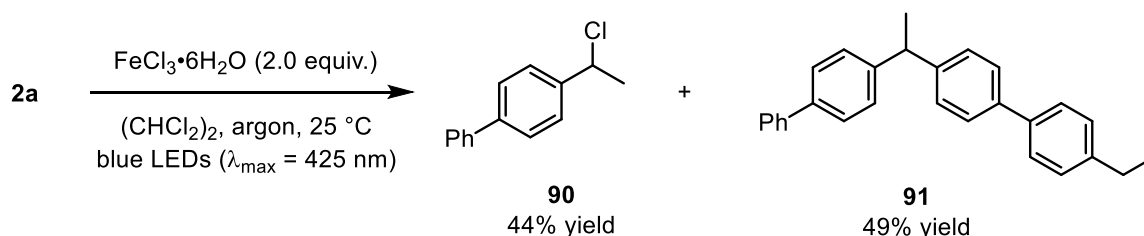

A Schlenk tube (10 mL) was charged with 4-ethylbiphenyl (**2a**, 54.6 mg, 0.30 mmol),  $\text{FeCl}_3 \cdot 6\text{H}_2\text{O}$  (162.2 mg, 0.60 mmol) and  $(\text{CHCl}_2)_2$  (0.75 mL). The mixture was degassed *via* three freeze-pump-thaw cycles, then filled with an argon atmosphere. The Schlenk tube was positioned approximately 5 cm away from a 50 W LED lamp ( $\lambda_{\text{max}} = 425 \text{ nm}$ ). After being stirred at 25 °C for 24 h, the reaction mixture was concentrated to dryness. Purification using silica gel column chromatography (elution with PE:DCM = 5:1) gave the pure product **90** as a white solid (28.5 mg, 0.132 mmol, 44% yield) and **91** as a white solid (53.2 mg, 0.147 mmol, 49% yield).

##### 4-(1-chloroethyl)-1,1'-biphenyl (**90**)

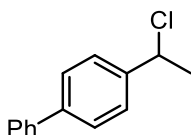

**$^1\text{H}$  NMR** (500 MHz,  $\text{CDCl}_3$ )  $\delta$  7.77 – 7.74 (m, 2H), 7.62 – 7.50 (m, 2H), 7.54 – 7.41 (m, 4H), 7.40 – 7.36 (m, 1H), 5.26 (q,  $J = 6.8 \text{ Hz}$ , 1H), 1.97 (q,  $J = 6.8 \text{ Hz}$ , 3H).

**$^{13}\text{C}$  NMR** (126 MHz,  $\text{CDCl}_3$ )  $\delta$  144.7, 140.4, 139.1, 129.2, 128.9, 127.9, 127.4, 126.5, 60.0, 24.0 .

**HRMS** (ESI-TOF,  $m/z$ ) calculated for  $\text{C}_{14}\text{H}_{14}\text{Cl}^+$   $[\text{M}+\text{H}]^+$  217.0779, found 217.0780.

##### 4-(1-([1,1'-biphenyl]-4-yl)ethyl)-4'-ethyl-1,1'-biphenyl (**91**)

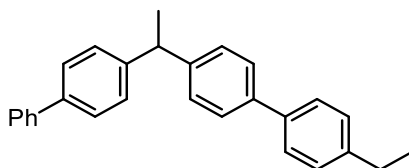

**$^1\text{H}$  NMR** (500 MHz,  $\text{CDCl}_3$ )  $\delta$  7.62 (d,  $J = 7.3 \text{ Hz}$ , 2H), 7.58 – 7.53 (m, 6H), 7.45 (t,  $J = 7.6$

Hz, 2H), 7.37 (t,  $J = 7.9$  Hz, 5H), 7.29 (d,  $J = 8.0$  Hz, 2H), 4.29 – 4.25 (m, 1H), 2.75 – 2.70 (m, 2H), 1.75 (d,  $J = 7.2$  Hz, 3H), 1.32 (d,  $J = 7.6$  Hz, 3H).

**$^{13}\text{C}$  NMR** (126 MHz,  $\text{CDCl}_3$ )  $\delta$  145.6, 145.2, 143.3, 141.1, 139.2, 138.5, 128.9, 128.4, 128.2, 128.1, 127.3, 127.2, 127.2, 127.2, 127.1, 44.3, 28.6, 22.0, 15.7.

**HRMS** (ESI-TOF,  $m/z$ ) calculated for  $\text{C}_{28}\text{H}_{27}^+$   $[\text{M}+\text{H}]^+$  363.2107, found 363.2110.

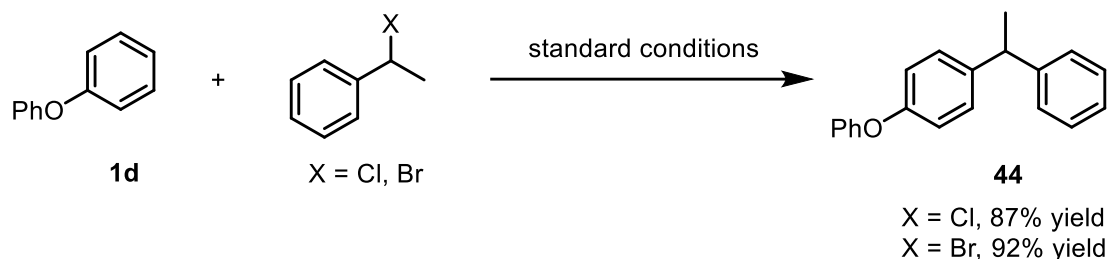

A Schlenk tube (10 mL) was charged with diphenyl ether (**1d**, 51.1 mg, 0.30 mmol), (1-chloroethyl)benzene (126.5 mg, 0.90 mmol) or (1-bromoethyl)benzene (166.6 mg, 0.90 mmol),  $\text{FeCl}_3 \cdot 6\text{H}_2\text{O}$  (16.2 mg, 0.060 mmol) and  $(\text{CHCl}_2)_2$  (0.75 mL). The mixture was degassed *via* three freeze-pump-thaw cycles, then filled with dry air. The Schlenk tube was positioned approximately 5 cm away from a 50 W LED lamp ( $\lambda_{\text{max}} = 410$  nm). After being stirred at 25 °C for 48 h, the reaction mixture was concentrated to dryness. Purification using silica gel column chromatography (elution with PE:DCM = 5:1) gave the pure product **44**. Obtained yields of 87% and 92%, respectively.

## 5. X-Ray Diffraction

### 5.1 Crystal Structure of Product 35

**A procedure for crystallization.** Compound **35** was dissolved in a mixture of  $\text{CHCl}_3$  (0.5 mL) and hexane (1.0 mL). Single crystals were obtained after evaporation under ambient conditions for 4 days.

**Data collection and solution.** Data was collected on a XtaLAB Synergy four-circle diffractometer with monochromatic  $\text{Cu K}\alpha$  radiation ( $\lambda = 1.54184 \text{ \AA}$ ) at 100 K. Data reduction and absorption correction were applied by using the multi-scan program. The structures were determined and refined using full-matrix least-squares based on F2 with SHELXT and SHELXL within Olex2. The structure is shown on Supplementary Figure 4. Crystallographic data for complex **35** has been deposited with the Cambridge Crystallographic Data Centre as supplementary publication number CCDC 2251704.

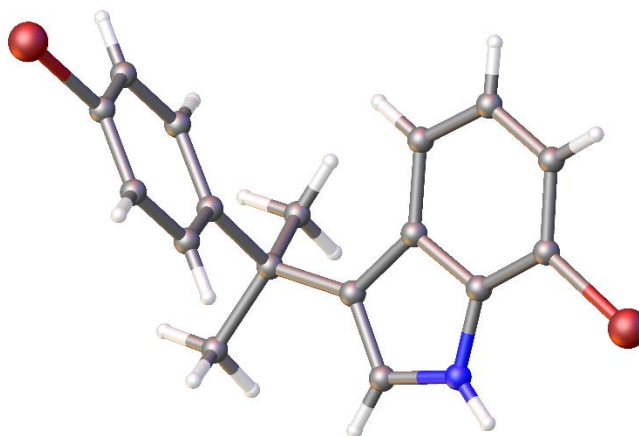

**Supplementary Figure 4.** Ortep drawing of compound **35**

### 5.2 Crystal Structure of Product 38

**A procedure for crystallization.** Compound **38** was dissolved in a mixture of  $\text{CHCl}_3$  (0.5 mL) and hexane (1.0 mL). Single crystals were obtained after evaporation under ambient conditions for 5 days.

**Data collection and solution.** Data was collected on a XtaLAB Synergy four-circle diffractometer with monochromatic  $\text{Cu K}\alpha$  radiation ( $\lambda = 1.54184 \text{ \AA}$ ) at 100 K. Data reduction and absorption correction were applied by using the multi-scan program. The structures were determined and refined using full-matrix least-squares based on F2 with SHELXT and SHELXL within Olex2. The structure is shown on Supplementary Figure 5. Crystallographic data for complex **38** has been deposited with the Cambridge Crystallographic Data Centre as supplementary publication number CCDC 2251707.

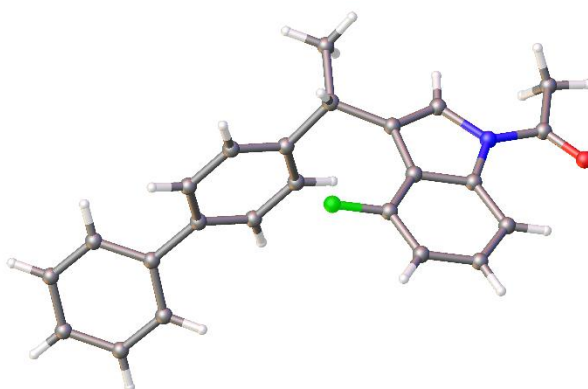

**Supplementary Figure 5.** Ortep drawing of compound **38**

**Supplementary Table 2.** Data collection and refinement statistics for the compounds **35** and **38**

|                                          | <b>35</b>                                                     | <b>38</b>                                                    |
|------------------------------------------|---------------------------------------------------------------|--------------------------------------------------------------|
| CCDC                                     | 2251704                                                       | 2251707                                                      |
| Empirical formula                        | C <sub>17</sub> H <sub>15</sub> Br <sub>2</sub> N             | C <sub>24</sub> H <sub>20</sub> FNO                          |
| Formula weight                           | 1572.48                                                       | 357.41                                                       |
| Temperature (K)                          | 265                                                           | 272                                                          |
| Crystal system                           | triclinic                                                     | triclinic                                                    |
| Space group                              | <i>P</i> -1                                                   | <i>P</i> -1                                                  |
| <i>a</i> , <i>b</i> , <i>c</i> (Å)       | 10.3195, 17.5630, 19.6201                                     | 9.6287, 9.8951, 10.0269                                      |
| <i>α</i> , <i>β</i> , <i>γ</i> (°)       | 68, 75, 89                                                    | 100, 97, 95                                                  |
| Volume (Å <sup>3</sup> )                 | 3176.62                                                       | 928.57                                                       |
| <i>Z</i>                                 | 2                                                             | 2                                                            |
| Density (calculated, mg/m <sup>3</sup> ) | 1.644                                                         | 1.278                                                        |
| <i>μ</i> (mm <sup>-1</sup> )             | 6.374                                                         | 0.678                                                        |
| <i>F</i> (000)                           | 1552.0                                                        | 376.0                                                        |
| Crystal size (mm <sup>3</sup> )          | 0.1 × 0.1 × 0.1                                               | 0.1 × 0.1 × 0.1                                              |
| 2 $\theta$ range for data collection/°   | 5.042 to 177.252                                              | 9.134 to 150.266                                             |
| Index ranges                             | -12 ≤ <i>h</i> ≤ 12, -21 ≤ <i>k</i> ≤ 22, -24 ≤ <i>l</i> ≤ 24 | -12 ≤ <i>h</i> ≤ 11, -12 ≤ <i>k</i> ≤ 12, -9 ≤ <i>l</i> ≤ 12 |

|                                                           |                                                                   |                                                                  |
|-----------------------------------------------------------|-------------------------------------------------------------------|------------------------------------------------------------------|
| Reflections collected                                     | 35049                                                             | 9769                                                             |
| Independent reflections                                   | 12384 [ $R_{\text{int}} = 0.0395$ , $R_{\text{sigma}} = 0.0411$ ] | 3616 [ $R_{\text{int}} = 0.0244$ , $R_{\text{sigma}} = 0.0288$ ] |
| Completeness                                              | 97.7%                                                             | 99.4%                                                            |
| Absorption correction                                     | multi-scan                                                        | multi-scan                                                       |
| Refinement method                                         | Full-matrix least-squares on $F^2$                                | Full-matrix least-squares on $F^2$                               |
| Data / restraints / parameters                            | 12384/0/729                                                       | 3616/0/247                                                       |
| Goodness-of-fit on $F^2$                                  | 1.071                                                             | 1.058                                                            |
| Final $R$ indices [ $I \geq 2\sigma(I)$ ]                 | $R_1 = 0.0477$ ,<br>$wR_2 = 0.1242$                               | $R_1 = 0.0427$ ,<br>$wR_2 = 0.1210$                              |
| $R$ indices (all data)                                    | $R_1 = 0.0605$ ,<br>$wR_2 = 0.1384$                               | $R_1 = 0.0493$ ,<br>$wR_2 = 0.1276$                              |
| Largest diff. peak/hole<br>( $\text{e.}\text{\AA}^{-3}$ ) | 0.15/-0.98                                                        | 0.17/-0.16                                                       |

### 5.3 Crystal Structure of Product 56

**A procedure for crystallization.** Compound **56** was dissolved in a mixture of  $\text{CHCl}_3$  (0.5 mL) and hexane (1.0 mL). Single crystals were obtained after evaporation under ambient conditions for 5 days.

**Data collection and solution.** Data was collected on a XtaLAB Synergy four-circle diffractometer with monochromatic Cu  $K\alpha$  radiation ( $\lambda = 1.54184 \text{ \AA}$ ) at 100 K. Data reduction and absorption correction were applied by using the multi-scan program. The structures were determined and refined using full-matrix least-squares based on  $F^2$  with SHELXT and SHELXL within Olex2. The structure is shown on Supplementary Figure 6. Crystallographic data for complex **56** has been deposited with the Cambridge Crystallographic Data Centre as supplementary publication number CCDC 2098093.

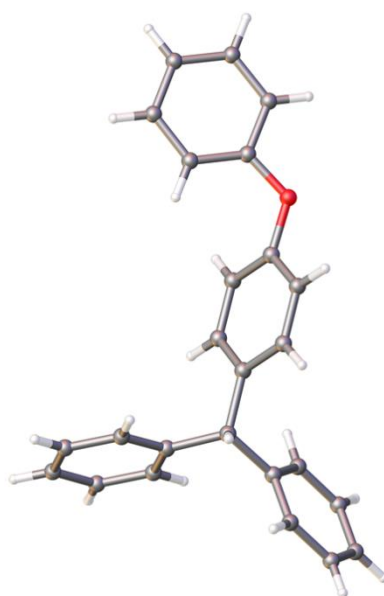

**Supplementary Figure 6.** Ortep drawing of compound **56**

**Supplementary Table 3.** Data collection and refinement statistics for the compounds **56**

|                                          | <b>56</b>                          |
|------------------------------------------|------------------------------------|
| CCDC                                     | 2098093                            |
| Empirical formula                        | C <sub>25</sub> H <sub>20</sub> O  |
| Formula weight                           | 336.41                             |
| Temperature (K)                          | 100.15                             |
| Crystal system                           | monoclinic                         |
| Space group                              | <i>P</i> 2 <sub>1</sub> / <i>c</i> |
| <i>a</i> , <i>b</i> , <i>c</i> (Å)       | 10.8428, 9.3075, 17.9231           |
| <i>α</i> , <i>β</i> , <i>γ</i> (°)       | 90, 98, 90                         |
| Volume (Å <sup>3</sup> )                 | 1790.17                            |
| <i>Z</i>                                 | 4                                  |
| Density (calculated, mg/m <sup>3</sup> ) | 1.248                              |
| <i>μ</i> (mm <sup>-1</sup> )             | 0.573                              |
| <i>F</i> (000)                           | 712.0                              |
| Crystal size (mm <sup>3</sup> )          | 0.3 × 0.2 × 0.2                    |
| 2 $\theta$ range for data collection/°   | 8.24 to 124.464                    |

|                                                 |                                                               |
|-------------------------------------------------|---------------------------------------------------------------|
| Index ranges                                    | $-12 \leq h \leq 12, -10 \leq k \leq 10, -20 \leq l \leq 20$  |
| Reflections collected                           | 21892                                                         |
| Independent reflections                         | 2798 [ $R_{\text{int}} = 0.0472, R_{\text{sigma}} = 0.0224$ ] |
| Completeness                                    | 100%                                                          |
| Absorption correction                           | multi-scan                                                    |
| Refinement method                               | Full-matrix least-squares on $F^2$                            |
| Data / restraints / parameters                  | 2798/0/236                                                    |
| Goodness-of-fit on $F^2$                        | 1.032                                                         |
| Final $R$ indices [ $I \geq 2\sigma(I)$ ]       | $R_1 = 0.0364,$<br>$wR_2 = 0.0952$                            |
| $R$ indices (all data)                          | $R_1 = 0.0394,$<br>$wR_2 = 0.0991$                            |
| Largest diff. peak/hole (e. $\text{\AA}^{-3}$ ) | 0.16/-0.16                                                    |

## 6. Computational Studies

### 6.1 General Information

DFT calculations were performed with Gaussian 09.<sup>[9]</sup> Optimization of the geometries of key intermediates were conducted at M06-2X/def2-TZVP level of theory<sup>[10, 11]</sup> and solvation (dichloromethane) with SMD model.<sup>[12]</sup> All calculations are included semi-empirical dispersion correction (DFT-D3).<sup>[13]</sup> Hirshfeld charges were analyzed in Multiwfn.<sup>[14]</sup>

### 6.2 Hirshfeld Charge Analysis

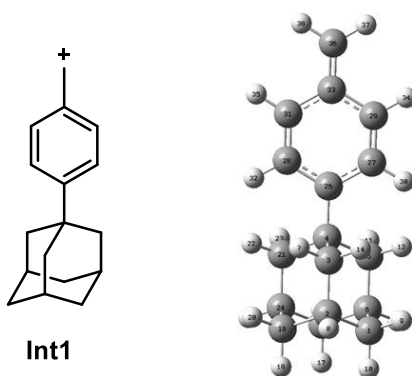

| Atom |        | Hirshfeld charges (a.u.) |
|------|--------|--------------------------|
| Atom | 1(C):  | -0.05241841              |
| Atom | 2(C):  | -0.01445658              |
| Atom | 3(C):  | -0.04045956              |
| Atom | 4(C):  | 0.01908687               |
| Atom | 5(C):  | -0.04747637              |
| Atom | 6(C):  | -0.01630316              |
| Atom | 7(H):  | 0.03525841               |
| Atom | 8(H):  | 0.03681989               |
| Atom | 9(H):  | 0.03039333               |
| Atom | 10(H): | 0.03243369               |
| Atom | 11(H): | 0.03494354               |
| Atom | 12(H): | 0.03696399               |
| Atom | 13(H): | 0.03495487               |
| Atom | 14(H): | 0.03525850               |
| Atom | 15(C): | -0.05378989              |
| Atom | 16(H): | 0.03016640               |
| Atom | 17(H): | 0.03170680               |
| Atom | 18(C): | -0.05241834              |
| Atom | 19(H): | 0.03243370               |
| Atom | 20(H): | 0.03039341               |

|      |        |             |
|------|--------|-------------|
| Atom | 21(C): | -0.04747653 |
| Atom | 22(H): | 0.03696425  |
| Atom | 23(H): | 0.03494377  |
| Atom | 24(C): | -0.01630304 |
| Atom | 25(H): | 0.03495478  |
| Atom | 26(C): | 0.10527252  |
| Atom | 27(C): | -0.01590009 |
| Atom | 28(C): | -0.01590037 |
| Atom | 29(C): | 0.04409792  |
| Atom | 30(H): | 0.06911611  |
| Atom | 31(C): | 0.04409826  |
| Atom | 32(H): | 0.06911581  |
| Atom | 33(C): | 0.01240613  |
| Atom | 34(H): | 0.08631337  |
| Atom | 35(H): | 0.08631347  |
| Atom | 36(C): | 0.12308173  |
| Atom | 37(H): | 0.10270518  |
| Atom | 38(H): | 0.10270564  |

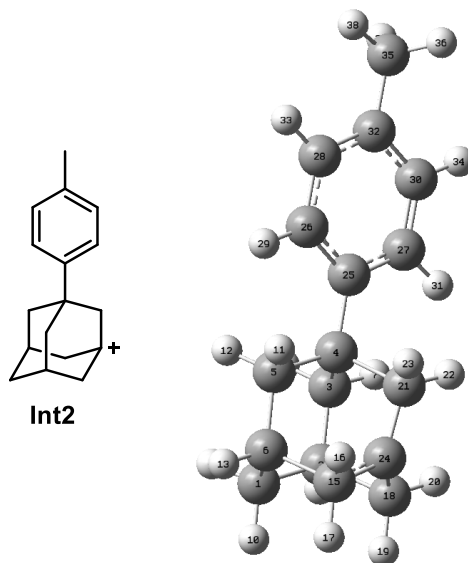

| Atom | Hirshfeld charges (a.u.) |
|------|--------------------------|
| Atom | 1(C): -0.04236664        |
| Atom | 2(C): 0.02210931         |
| Atom | 3(C): -0.04440973        |
| Atom | 4(C): 0.04652892         |
| Atom | 5(C): -0.04312083        |
| Atom | 6(C): 0.02317372         |
| Atom | 7(H): 0.04771333         |

|      |        |             |
|------|--------|-------------|
| Atom | 8(H):  | 0.06552631  |
| Atom | 9(H):  | 0.05699887  |
| Atom | 10(H): | 0.05078392  |
| Atom | 11(H): | 0.04955060  |
| Atom | 12(H): | 0.05570427  |
| Atom | 13(H): | 0.06601865  |
| Atom | 14(H): | 0.05454294  |
| Atom | 15(C): | -0.02178332 |
| Atom | 16(H): | 0.07305742  |
| Atom | 17(H): | 0.07236105  |
| Atom | 18(C): | -0.02212643 |
| Atom | 19(H): | 0.07212646  |
| Atom | 20(H): | 0.07255407  |
| Atom | 21(C): | -0.02716023 |
| Atom | 22(H): | 0.06715372  |
| Atom | 23(H): | 0.06849306  |
| Atom | 24(C): | 0.18245679  |
| Atom | 25(C): | -0.00747487 |
| Atom | 26(C): | -0.04689384 |
| Atom | 27(C): | -0.04373245 |
| Atom | 28(C): | -0.05091855 |
| Atom | 29(H): | 0.04933962  |
| Atom | 30(C): | -0.04803735 |
| Atom | 31(H): | 0.05157090  |
| Atom | 32(C): | 0.00267212  |
| Atom | 33(H): | 0.04955513  |
| Atom | 34(H): | 0.05126095  |
| Atom | 35(C): | -0.08303650 |
| Atom | 36(H): | 0.04344916  |
| Atom | 37(H): | 0.04378190  |
| Atom | 38(H): | 0.04257756  |

**Remarks:** Hirshfeld charge analysis revealed that the positive charge density of the benzyl carbocation (**Int1**) was lower than that of the adamantly carbocation (**Int2**) (0.123 to 0.182 a.u.).

### 6.3 Geometry Optimization

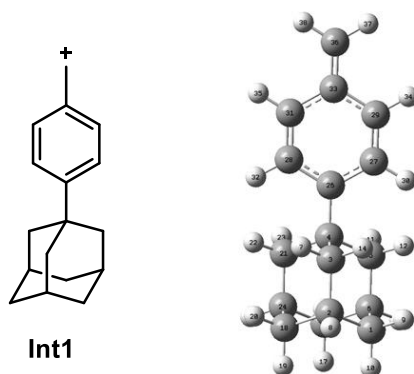

Cartesian Coordinates for **Int1**

| Atom | X           | Y           | Z           |
|------|-------------|-------------|-------------|
| C    | 2.87586400  | 1.24946800  | 0.80334200  |
| C    | 2.31225400  | 0.00007800  | 1.48756100  |
| C    | 0.78142900  | 0.00007600  | 1.39159800  |
| C    | 0.35217400  | -0.00000400 | -0.10818500 |
| C    | 0.94898500  | 1.25412400  | -0.78098100 |
| C    | 2.47760700  | 1.24554300  | -0.67674500 |
| H    | 0.36889600  | -0.88449200 | 1.88497700  |
| H    | 2.58683700  | 0.00013500  | 2.54486400  |
| H    | 2.49307800  | 2.15064900  | 1.29119200  |
| H    | 3.96514800  | 1.26132800  | 0.89677400  |
| H    | 0.63624600  | 1.28664100  | -1.82893100 |
| H    | 0.58470400  | 2.15993100  | -0.29538900 |
| H    | 2.86268400  | 2.14420300  | -1.16314200 |
| H    | 0.36889900  | 0.88469700  | 1.88488200  |
| C    | 3.04168200  | -0.00007500 | -1.36194800 |
| H    | 2.77145800  | -0.00013200 | -2.42194100 |
| H    | 4.13340900  | -0.00007400 | -1.29953100 |
| C    | 2.87585900  | -1.24938600 | 0.80347600  |
| H    | 3.96514400  | -1.26124100 | 0.89691000  |
| H    | 2.49307100  | -2.15051400 | 1.29142200  |
| C    | 0.94898100  | -1.25420400 | -0.78084800 |
| H    | 0.58469600  | -2.15995800 | -0.29516000 |
| H    | 0.63624200  | -1.28683100 | -1.82879500 |
| C    | 2.47760300  | -1.24561900 | -0.67661200 |
| H    | 2.86267700  | -2.14433200 | -1.16291200 |
| C    | -1.15277300 | -0.00000200 | -0.10469000 |
| C    | -1.87174400 | 1.22087700  | -0.06606100 |

|   |             |             |             |
|---|-------------|-------------|-------------|
| C | -1.87174400 | -1.22088000 | -0.06599700 |
| C | -3.23242600 | 1.23046700  | -0.01098000 |
| H | -1.34212500 | 2.16034300  | -0.08097400 |
| C | -3.23242400 | -1.23046700 | -0.01089300 |
| H | -1.34212500 | -2.16034600 | -0.08086700 |
| C | -3.96322100 | 0.00000100  | 0.01353000  |
| H | -3.78413900 | 2.16225300  | 0.01387800  |
| H | -3.78413700 | -2.16225200 | 0.01402300  |
| C | -5.31940800 | 0.00000100  | 0.06989100  |
| H | -5.87638700 | 0.92991300  | 0.09386000  |
| H | -5.87646000 | -0.92991000 | 0.09211200  |

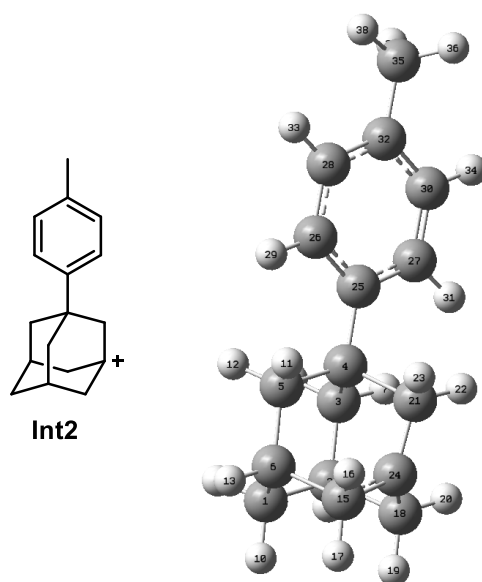

Cartesian Coordinates for **Int2**

| Atom | X          | Y           | Z           |
|------|------------|-------------|-------------|
| C    | 3.12205200 | 0.50083300  | 1.23103300  |
| C    | 2.51779300 | -0.89146100 | 1.10785700  |
| C    | 0.99583200 | -0.84340200 | 1.16110100  |
| C    | 0.43117500 | 0.05875600  | 0.05342700  |
| C    | 1.05250000 | 1.45475800  | 0.15876600  |
| C    | 2.57435600 | 1.38341700  | 0.11784200  |
| H    | 0.58959900 | -1.85171500 | 1.07206500  |
| H    | 2.91368600 | -1.57503600 | 1.85770300  |
| H    | 2.84845900 | 0.92870200  | 2.19809700  |
| H    | 4.21109000 | 0.45438800  | 1.18408000  |
| H    | 0.69173300 | 2.09069600  | -0.65175800 |
| H    | 0.74575300 | 1.91293300  | 1.10178000  |

|   |             |             |             |
|---|-------------|-------------|-------------|
| H | 3.00986600  | 2.38155400  | 0.13935900  |
| H | 0.67827600  | -0.44576300 | 2.12780600  |
| C | 3.02807000  | 0.76321900  | -1.29608600 |
| H | 2.62982600  | 1.39068000  | -2.08923800 |
| H | 4.11290000  | 0.70100300  | -1.31335800 |
| C | 2.96370900  | -1.51233600 | -0.30705900 |
| H | 4.04959700  | -1.53448700 | -0.34801200 |
| H | 2.52111900  | -2.50047100 | -0.40359900 |
| C | 0.92983500  | -0.56013700 | -1.36411800 |
| H | 0.53774600  | -1.57009700 | -1.45118900 |
| H | 0.57273900  | 0.09418000  | -2.15571700 |
| C | 2.36445100  | -0.51527600 | -1.16882300 |
| C | -1.08753000 | 0.05686900  | 0.03380000  |
| C | -1.83058600 | 1.23133200  | 0.09286600  |
| C | -1.78492200 | -1.15236600 | -0.04391200 |
| C | -3.22191300 | 1.19783700  | 0.07864000  |
| H | -1.33915500 | 2.19259200  | 0.15668600  |
| C | -3.16755300 | -1.18133700 | -0.05945400 |
| H | -1.24273800 | -2.08903300 | -0.09904600 |
| C | -3.91472500 | -0.00329500 | 0.00166700  |
| H | -3.77431100 | 2.12911700  | 0.12864000  |
| H | -3.68124500 | -2.13420600 | -0.12241700 |
| C | -5.41577500 | -0.04916500 | -0.01225100 |
| H | -5.77998800 | -0.59110300 | -0.88703300 |
| H | -5.79524400 | -0.56729700 | 0.87106300  |
| H | -5.84032300 | 0.95389300  | -0.02768500 |

## 7. $^1\text{H}$ and $^{13}\text{C}$ NMR Spectrum

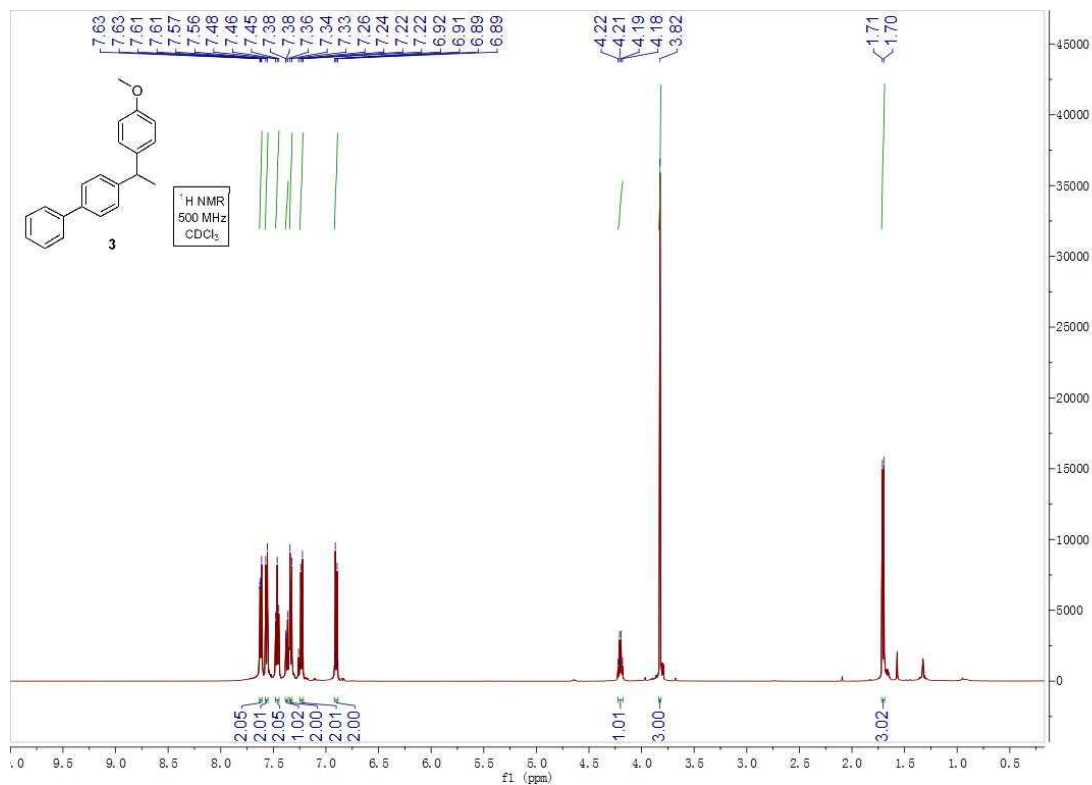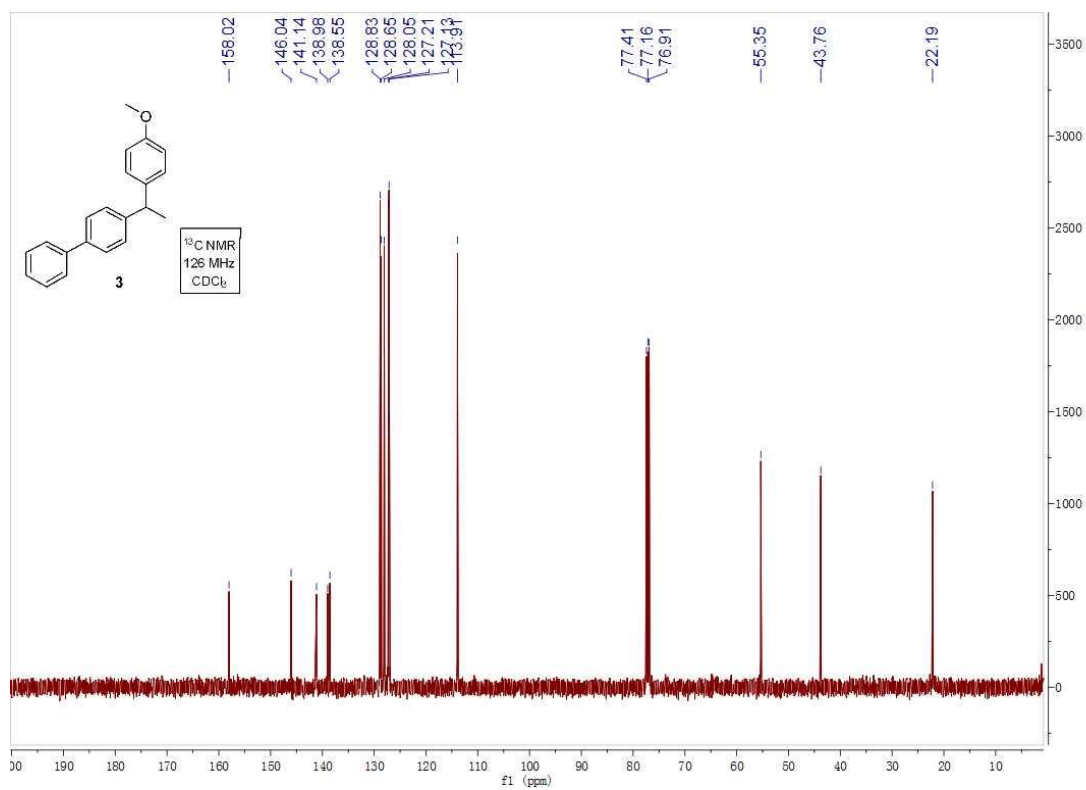

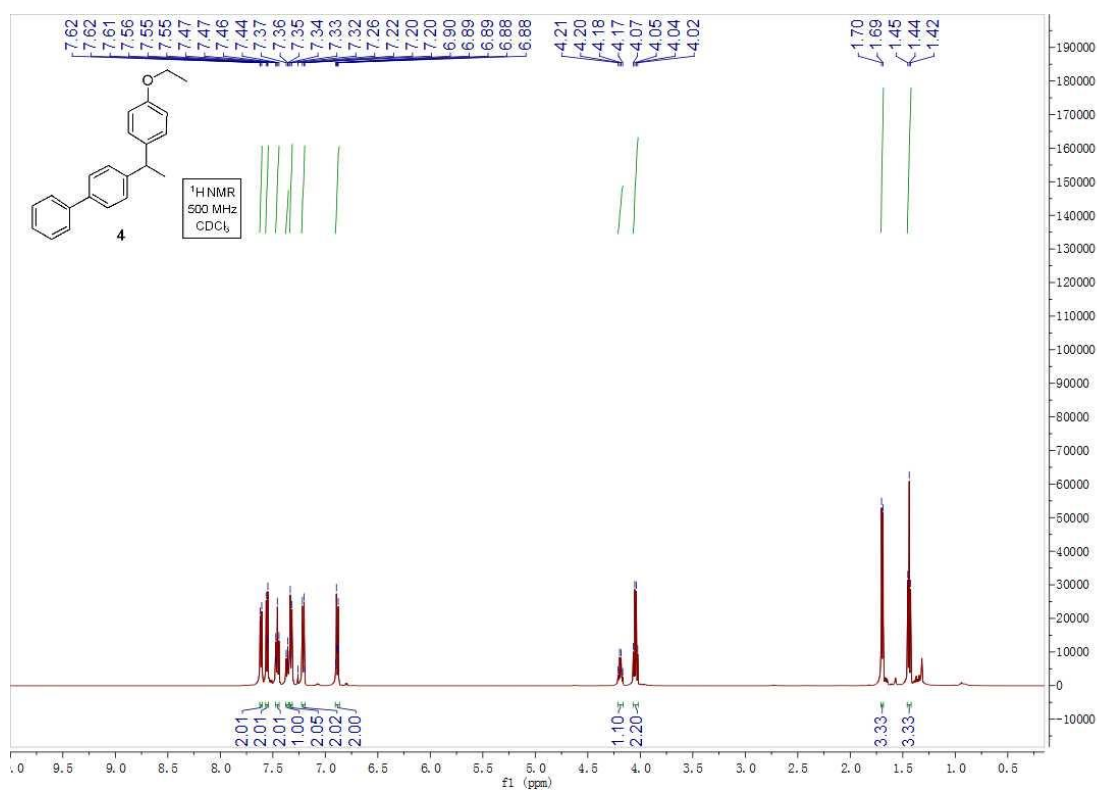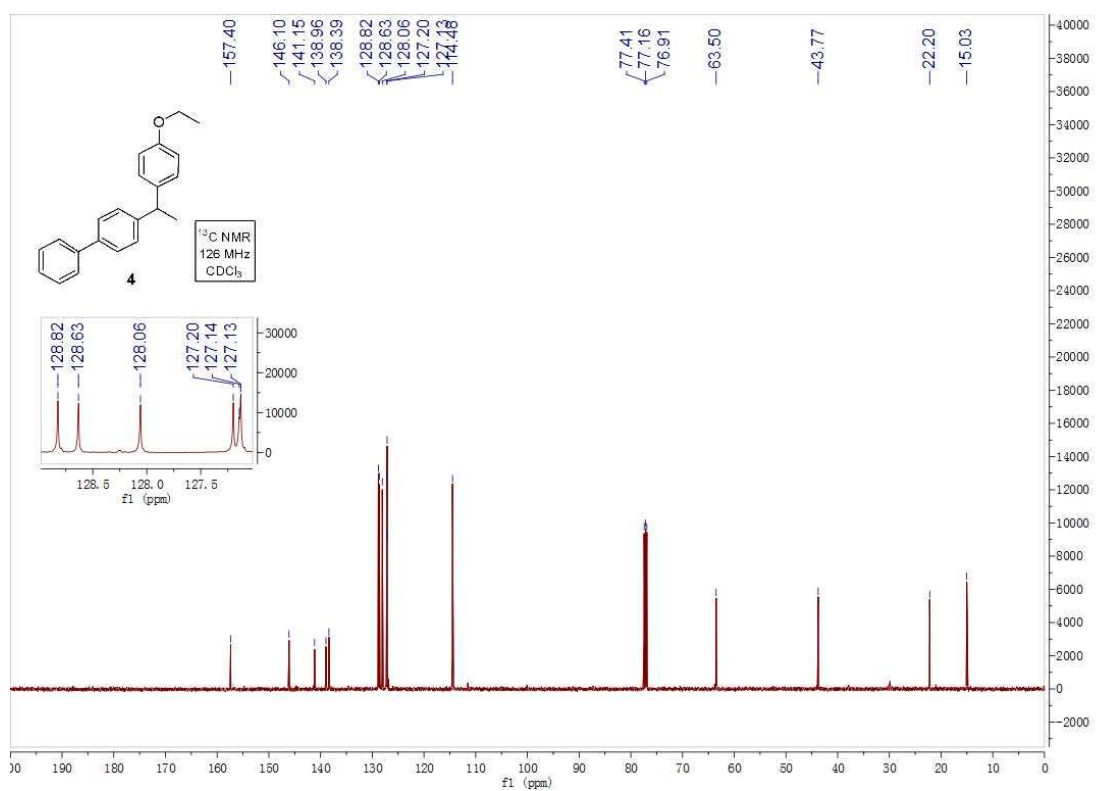

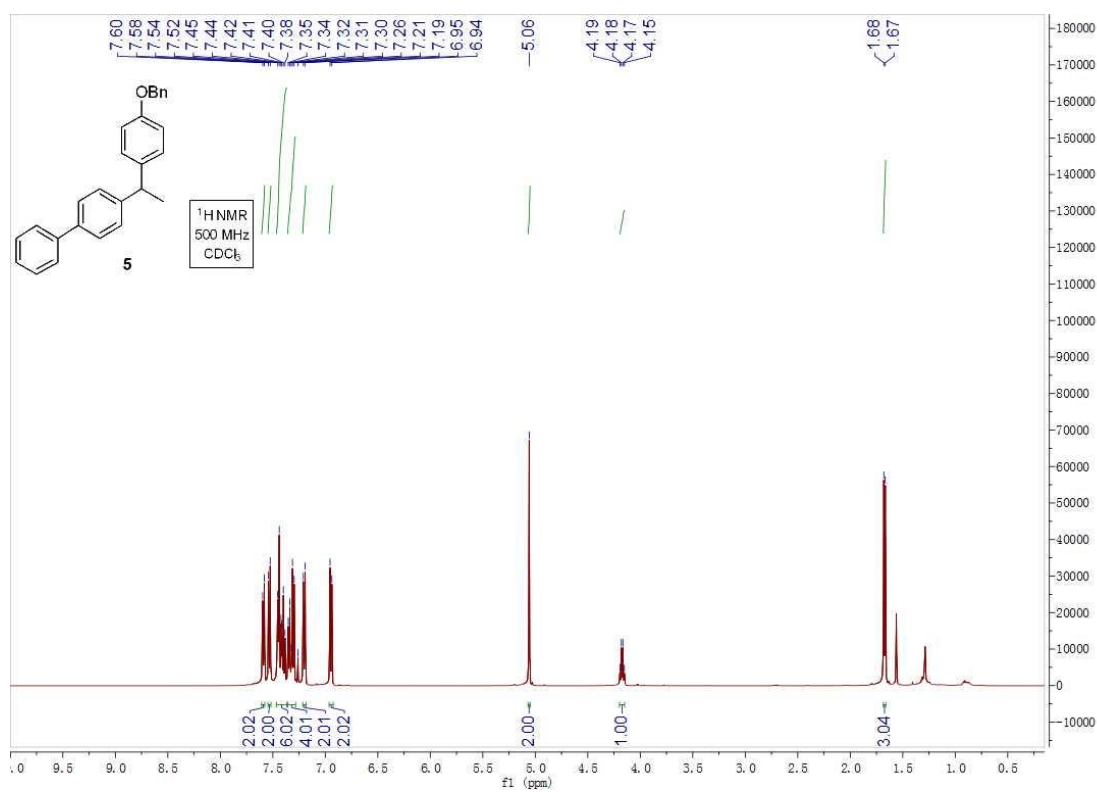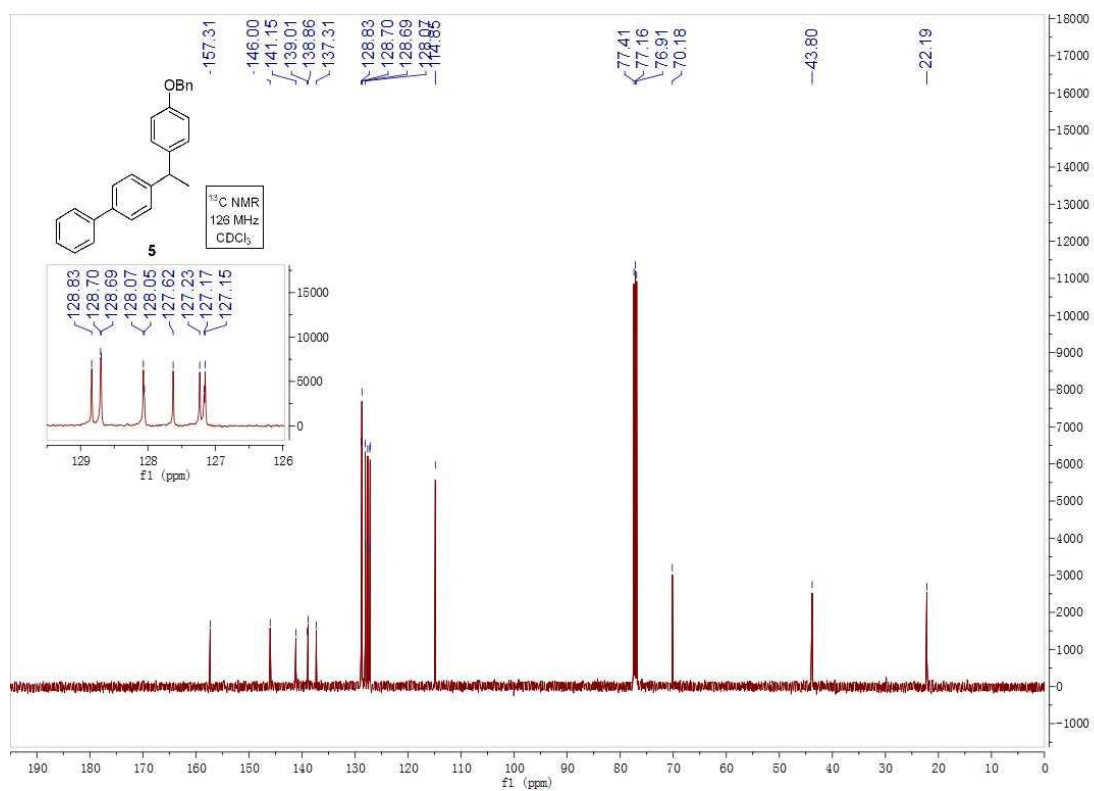

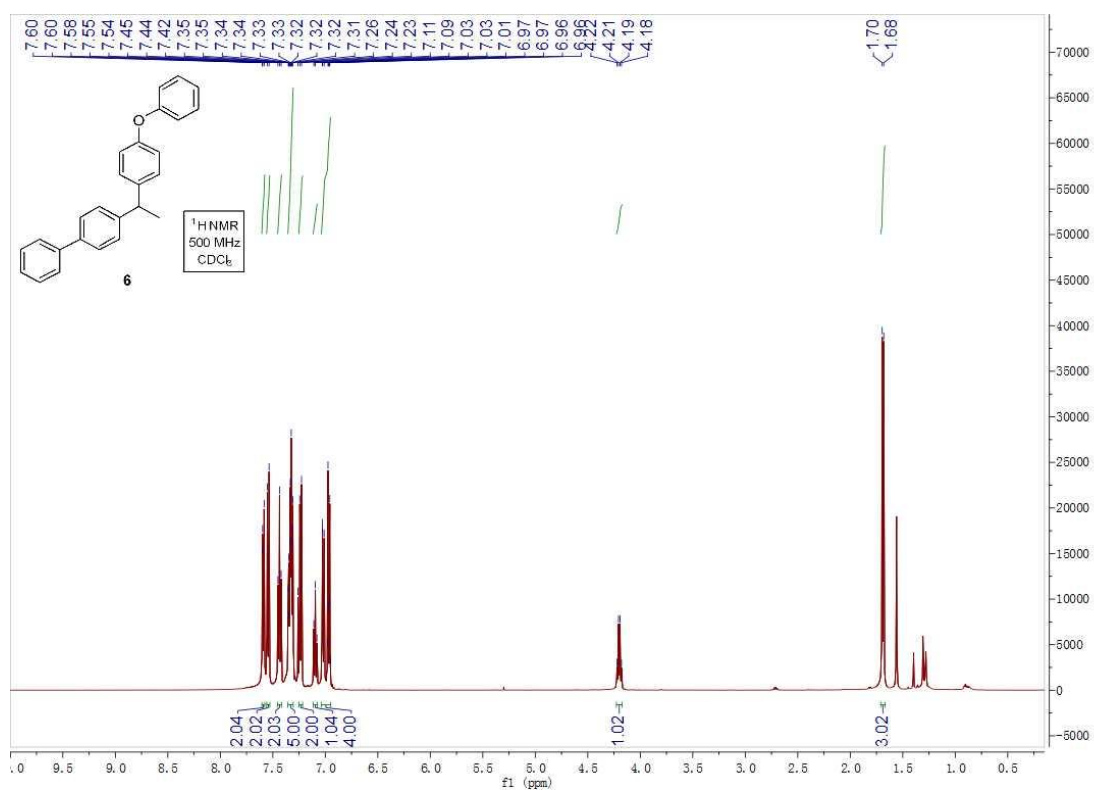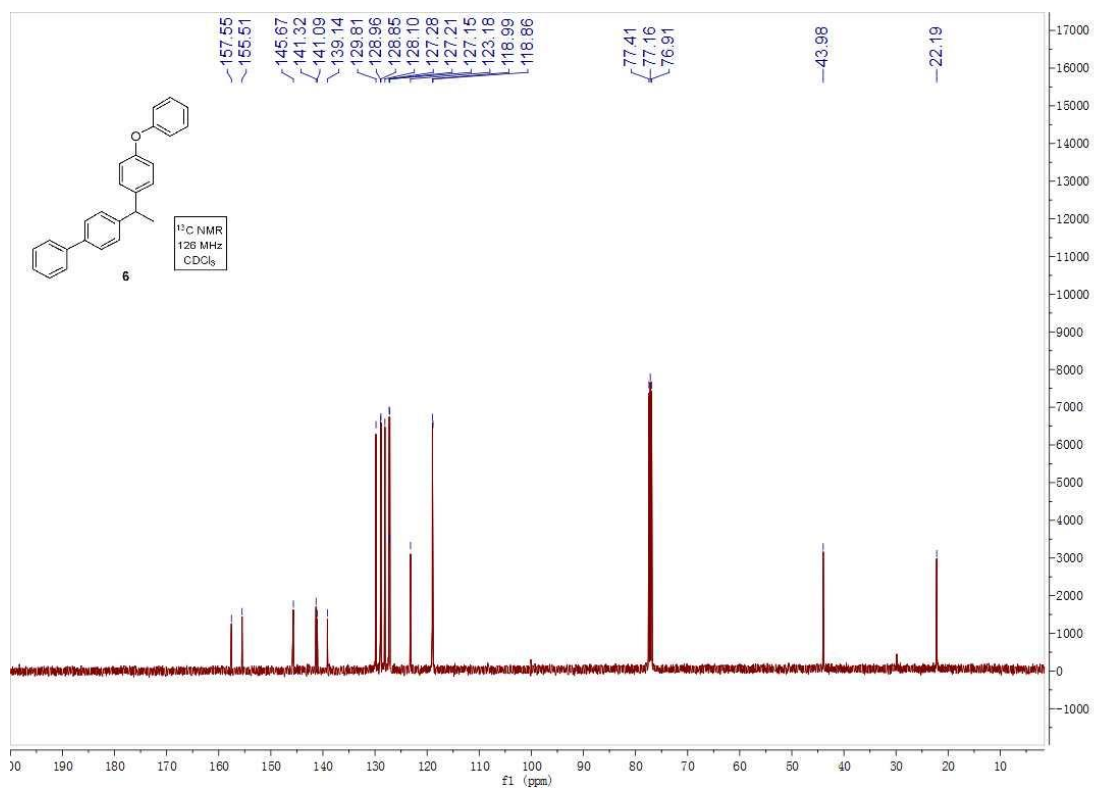

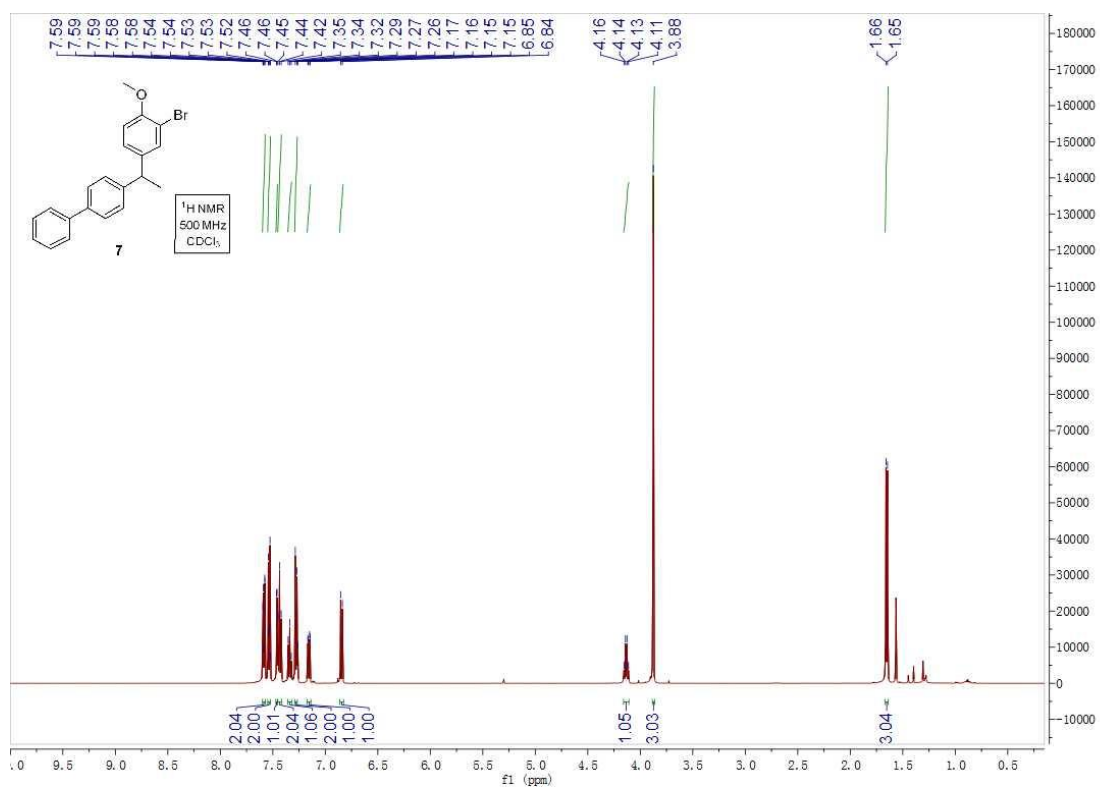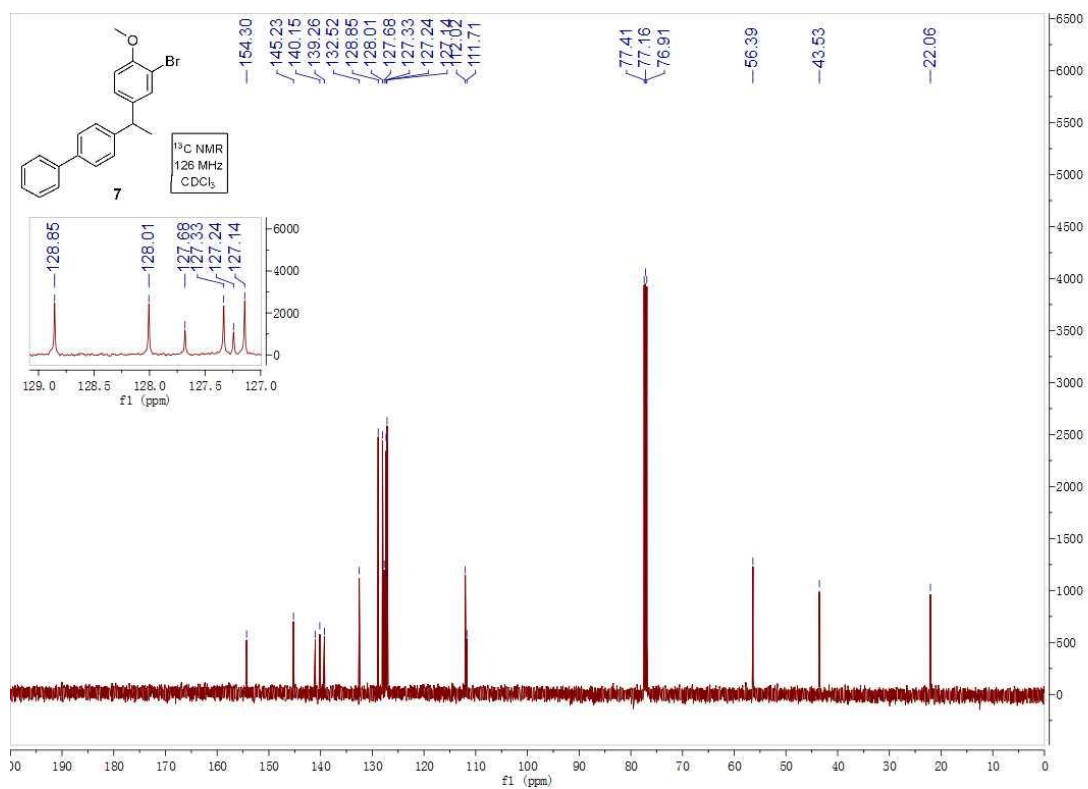

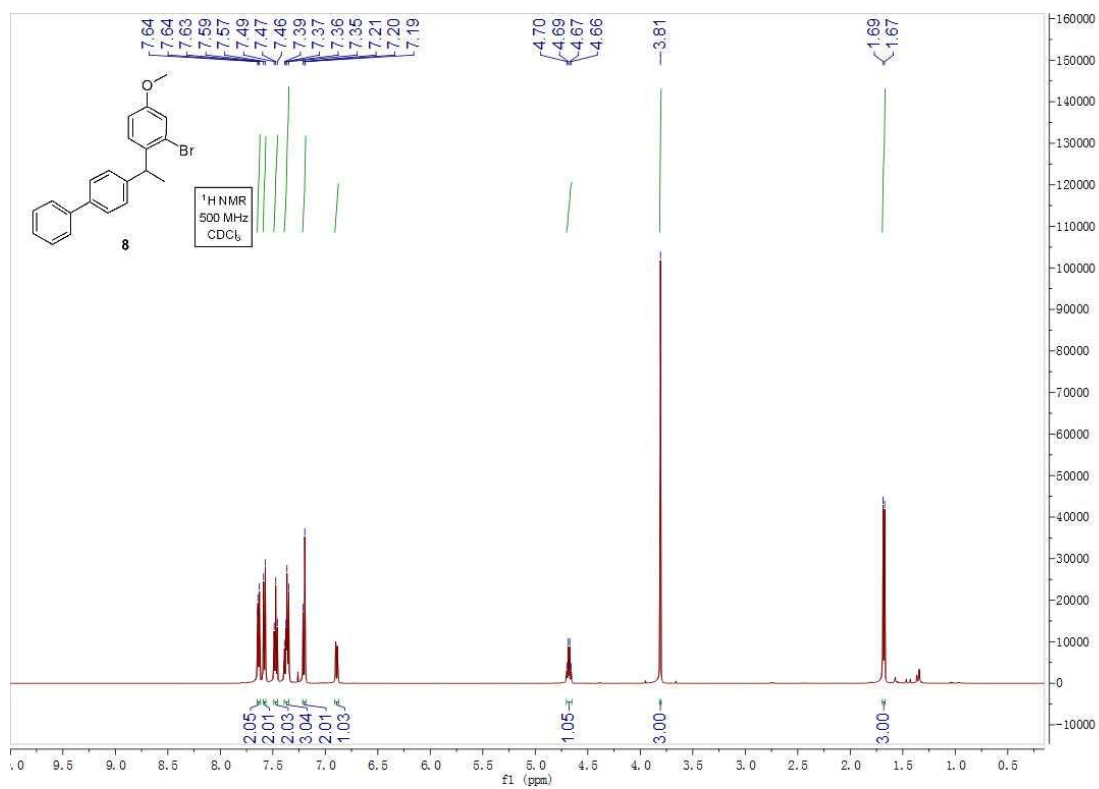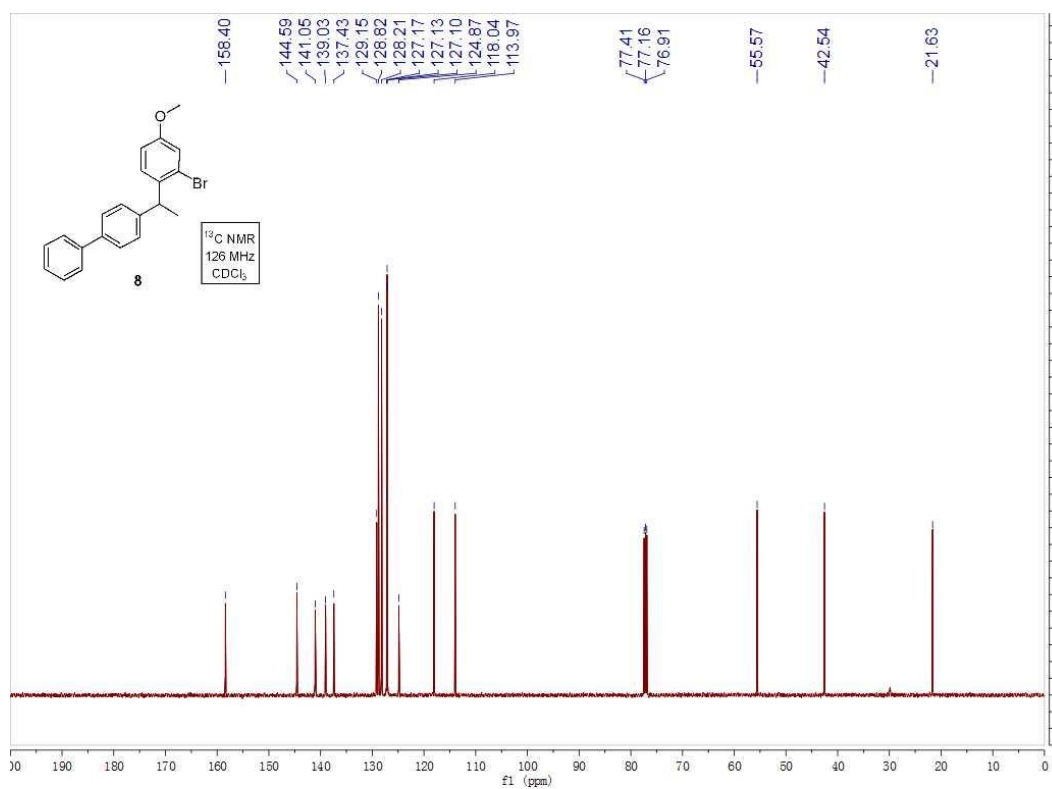

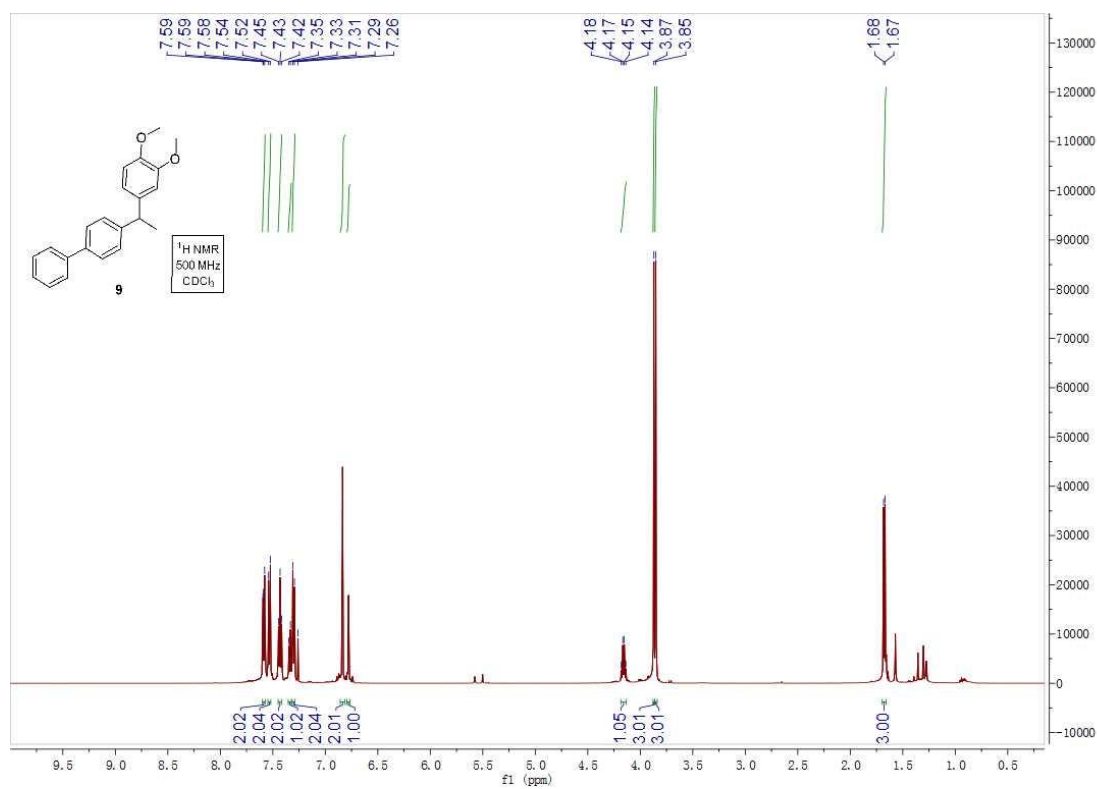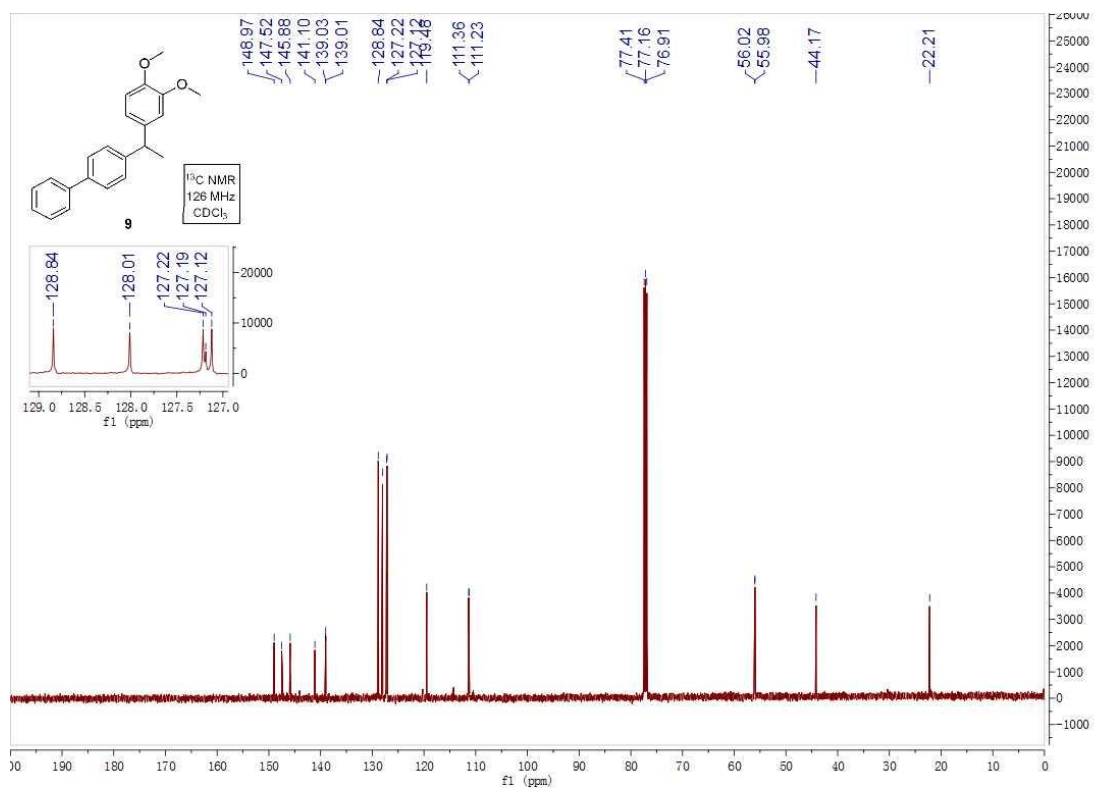

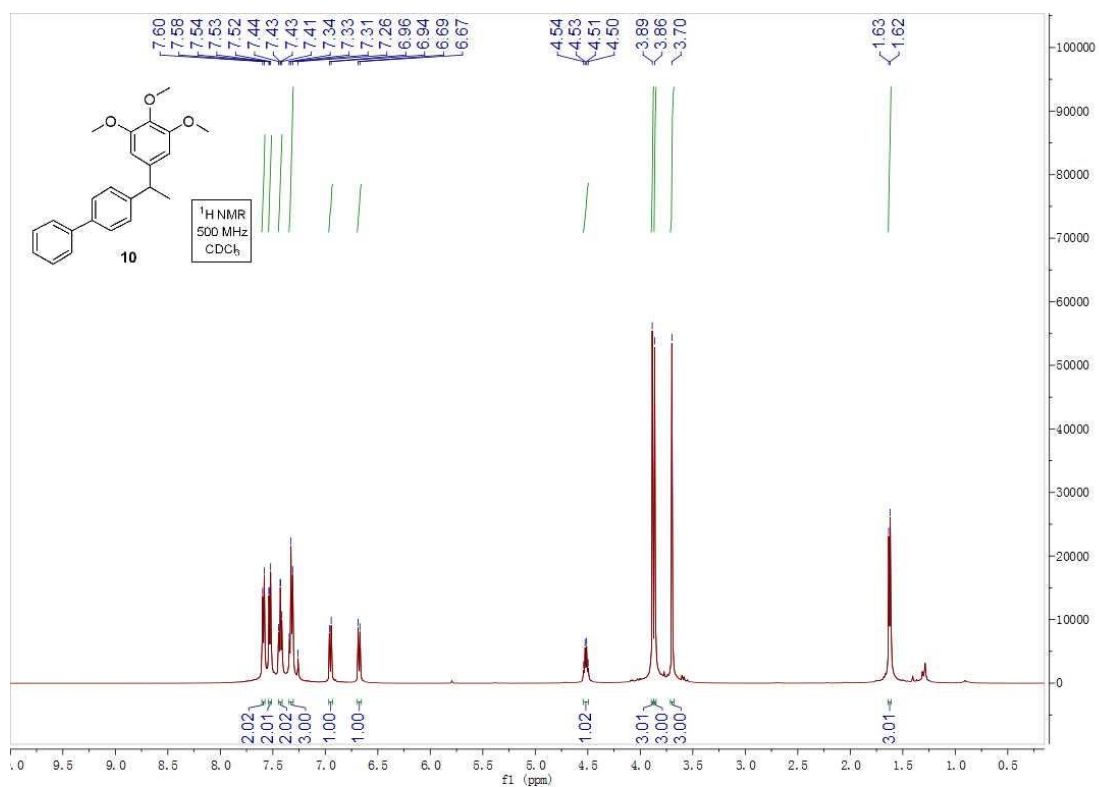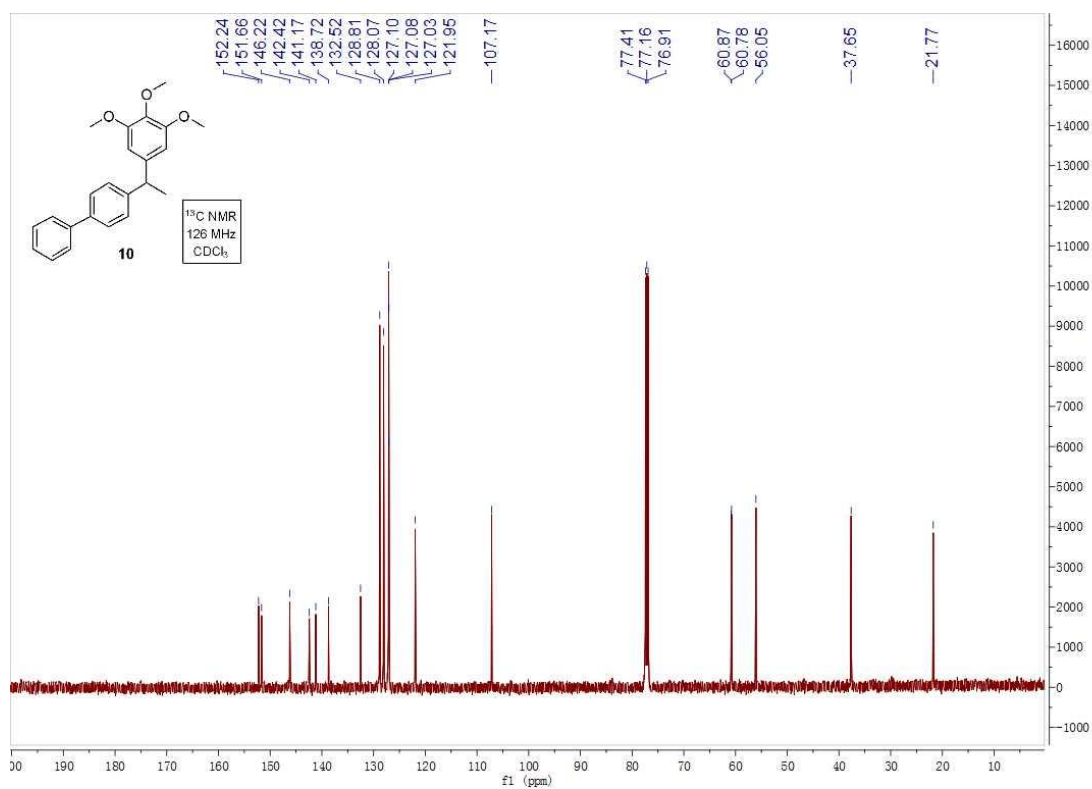

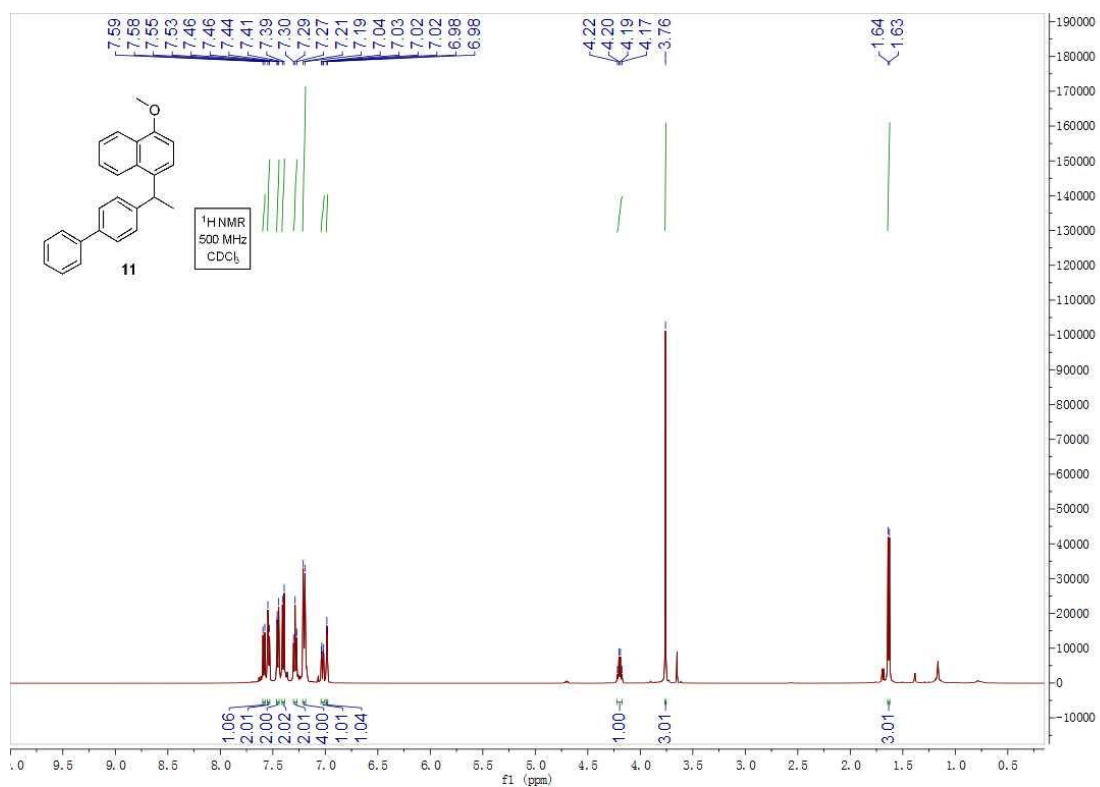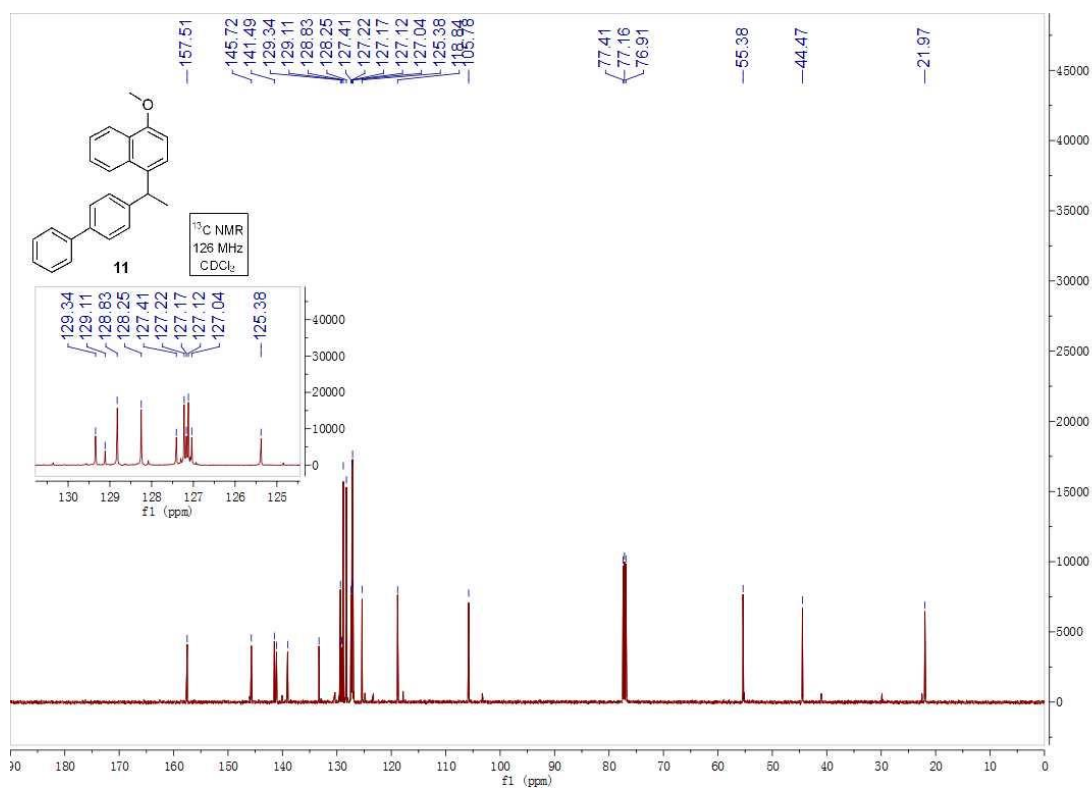

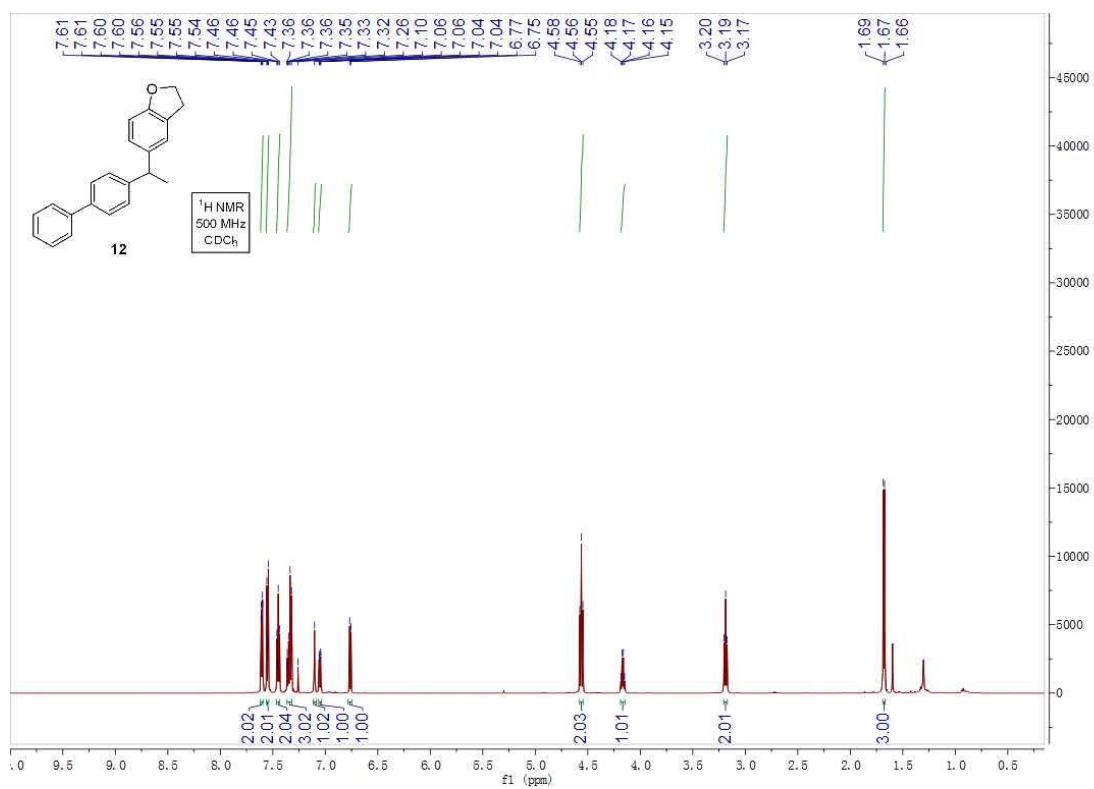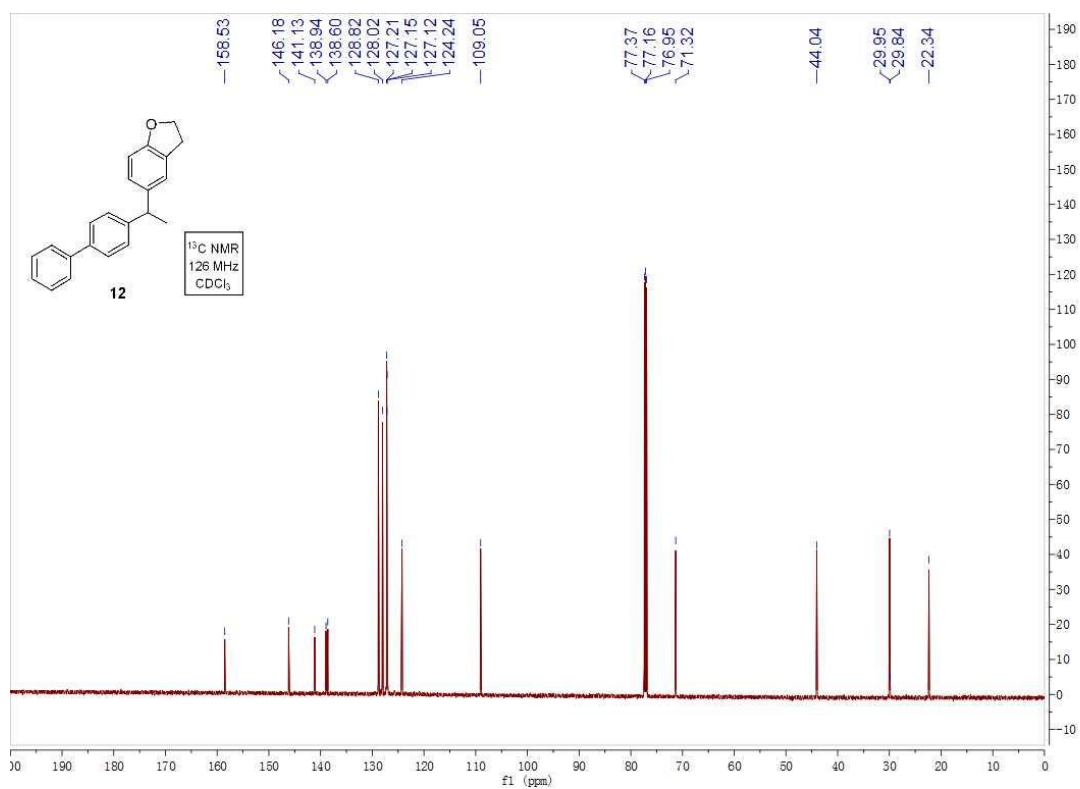

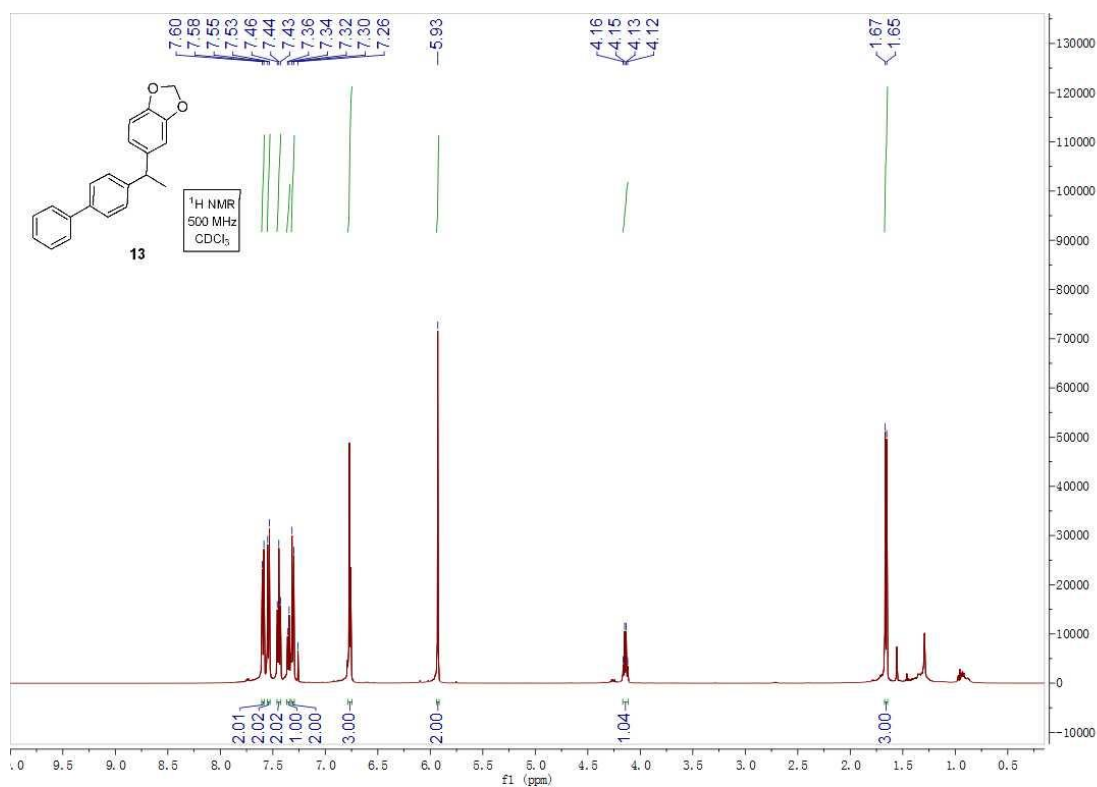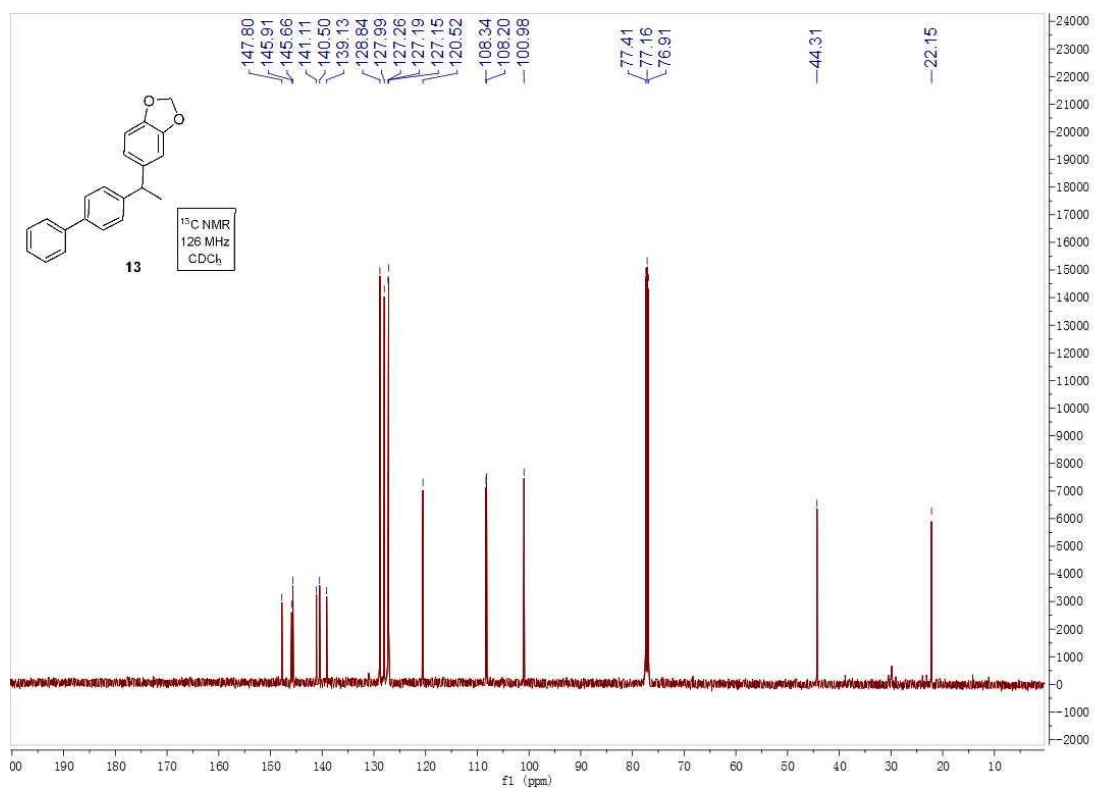

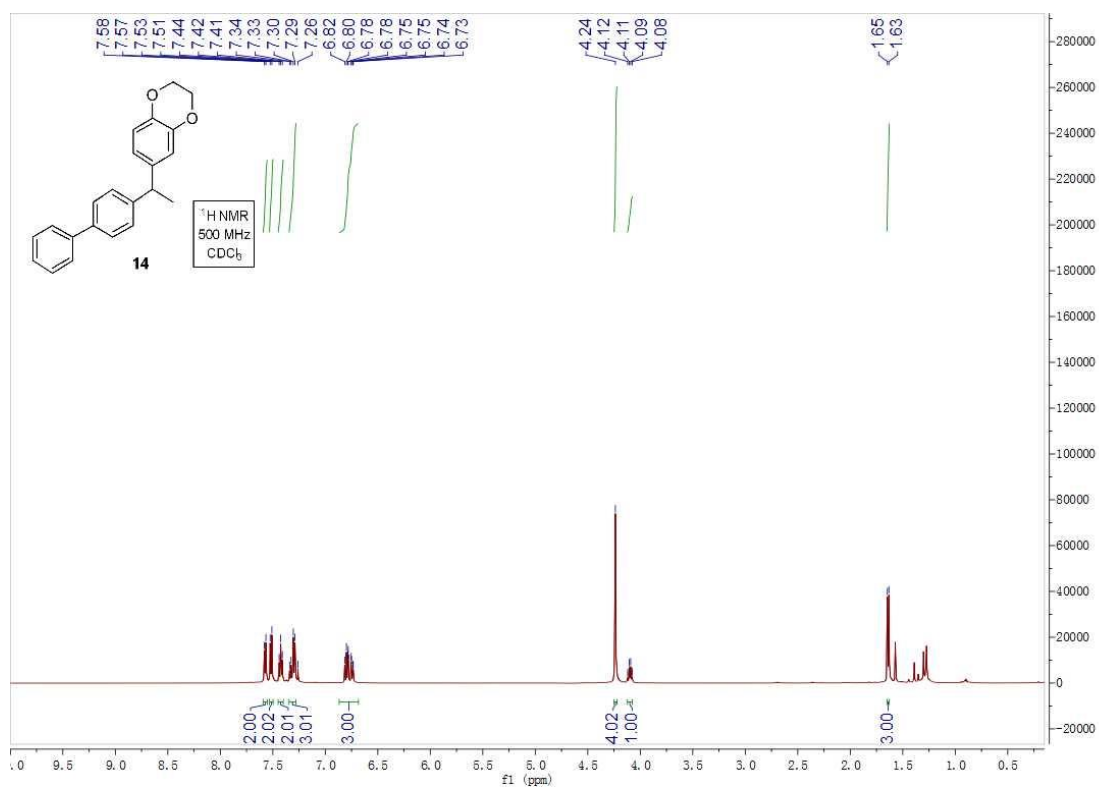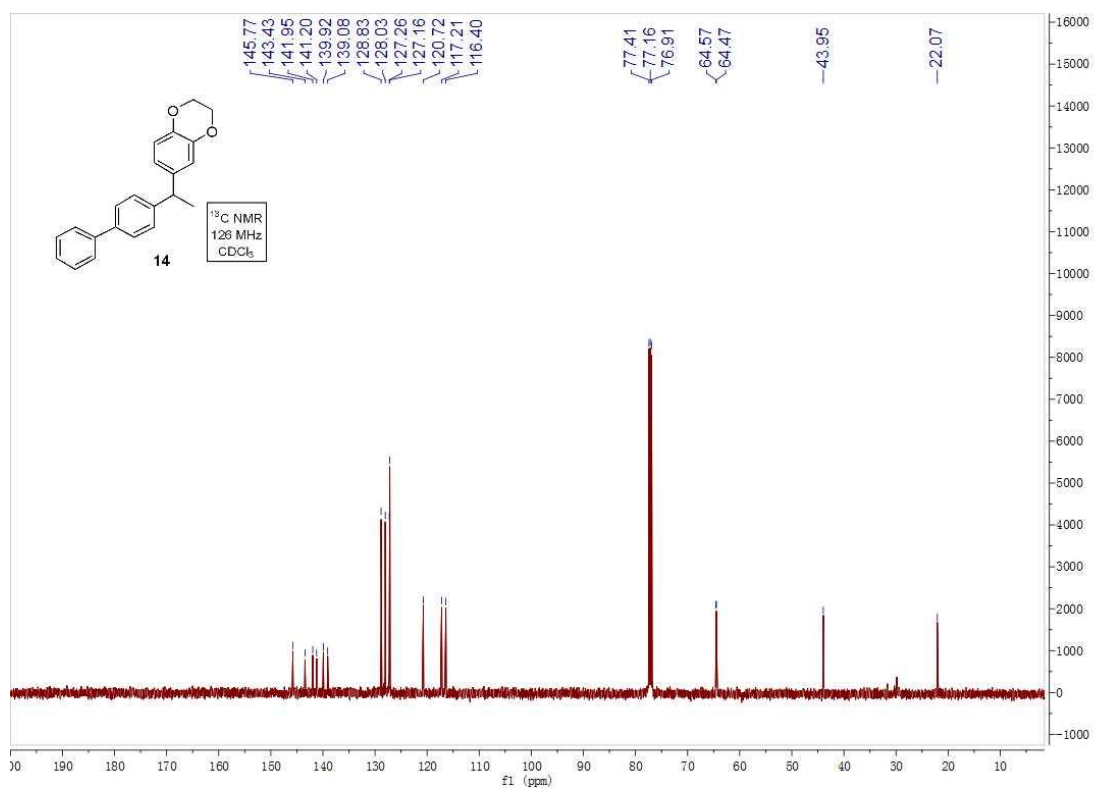

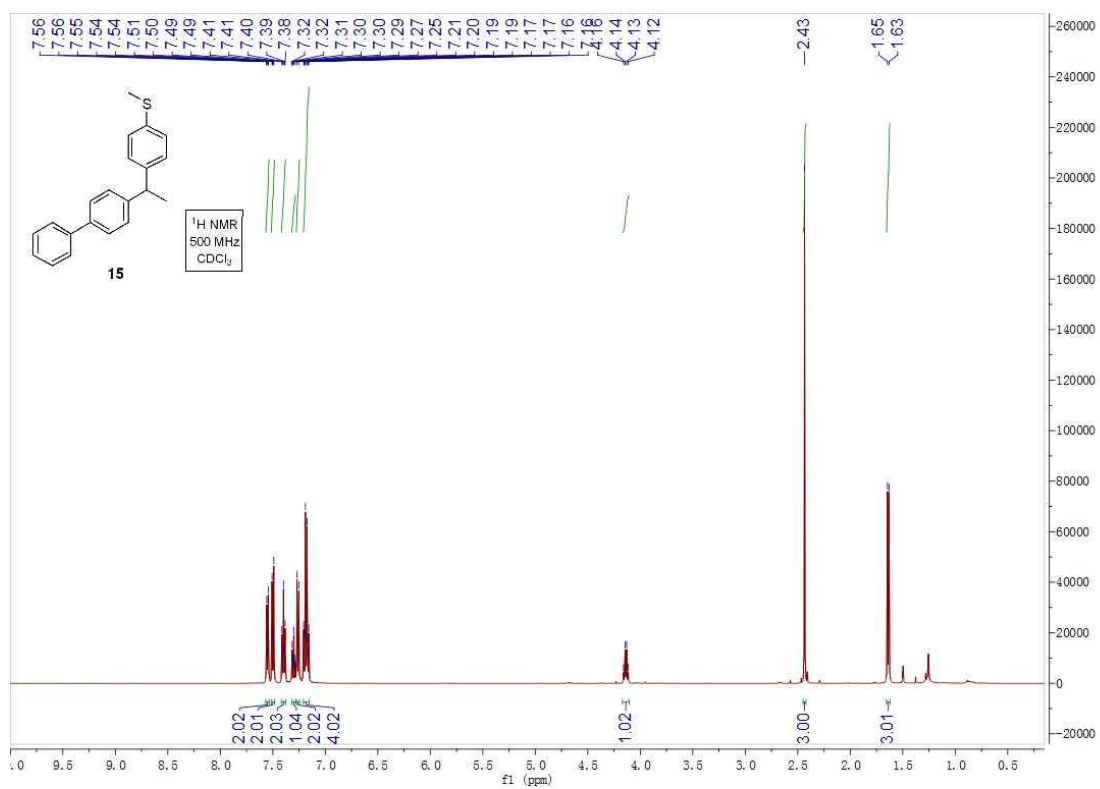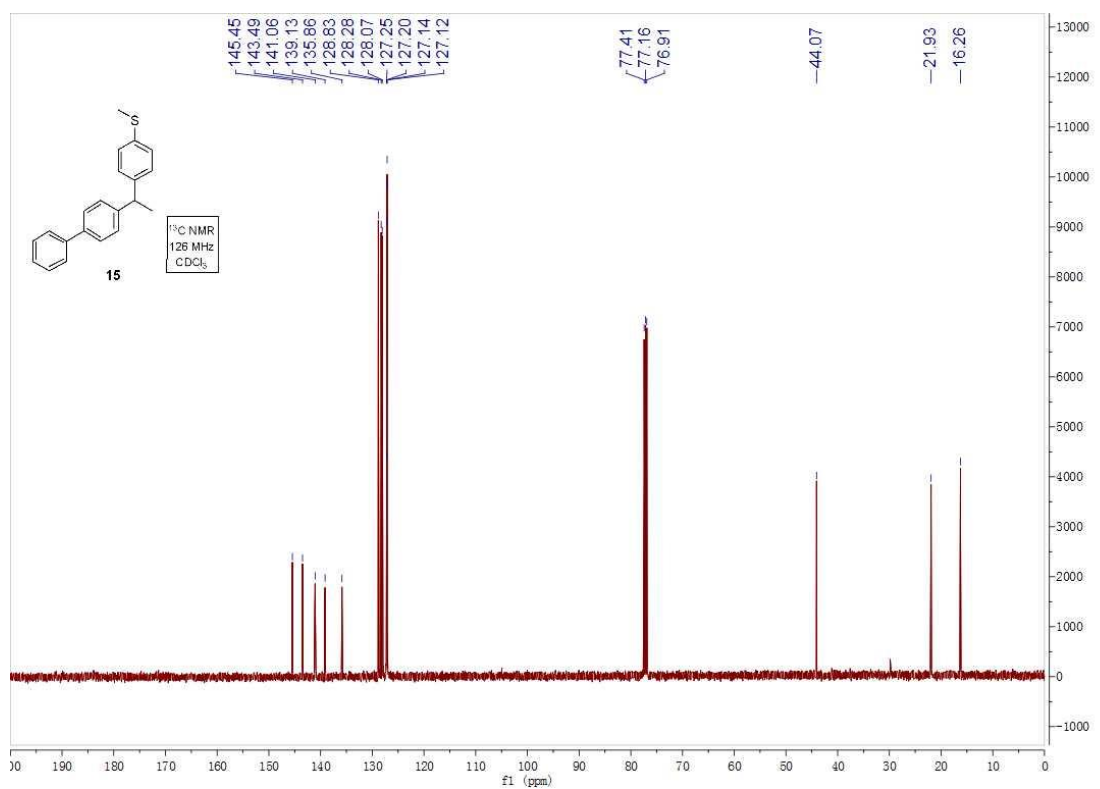

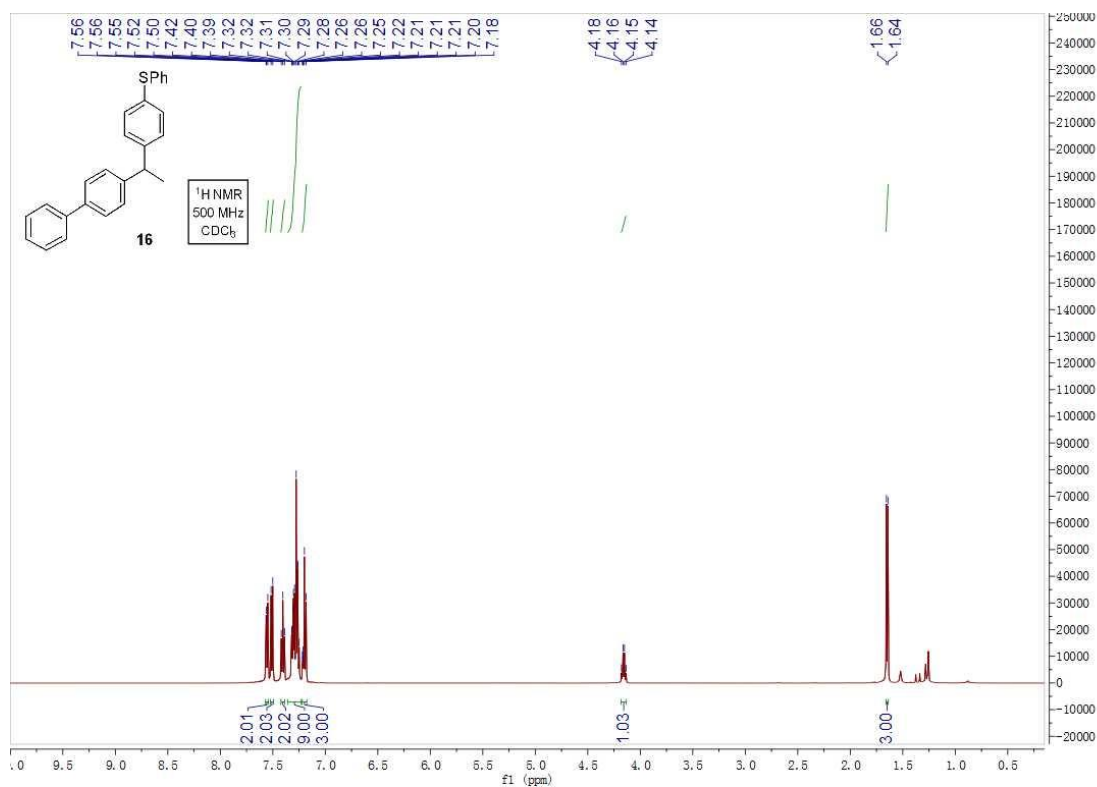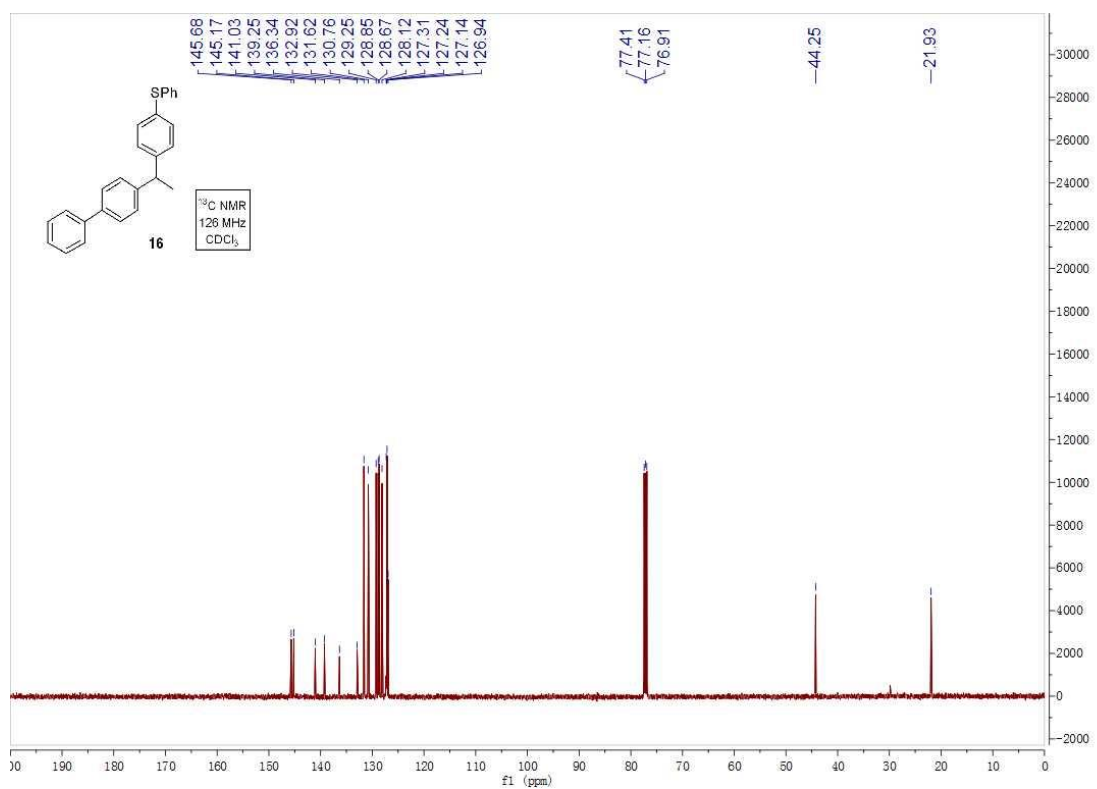

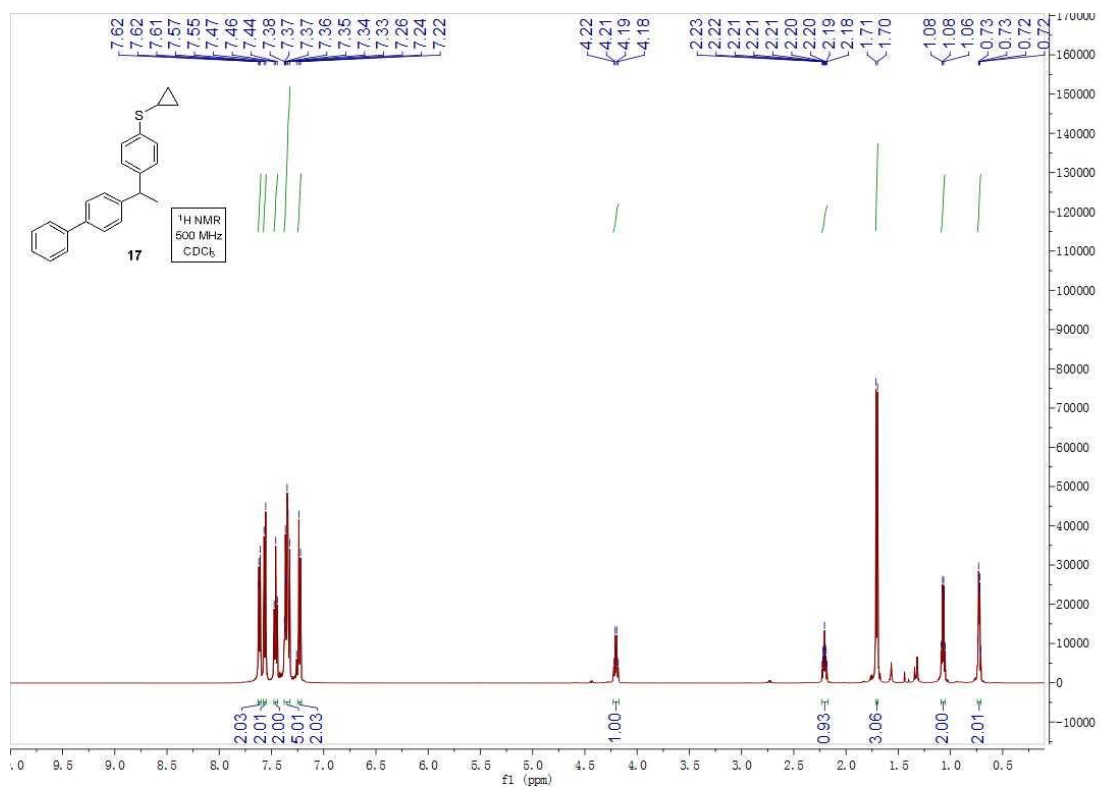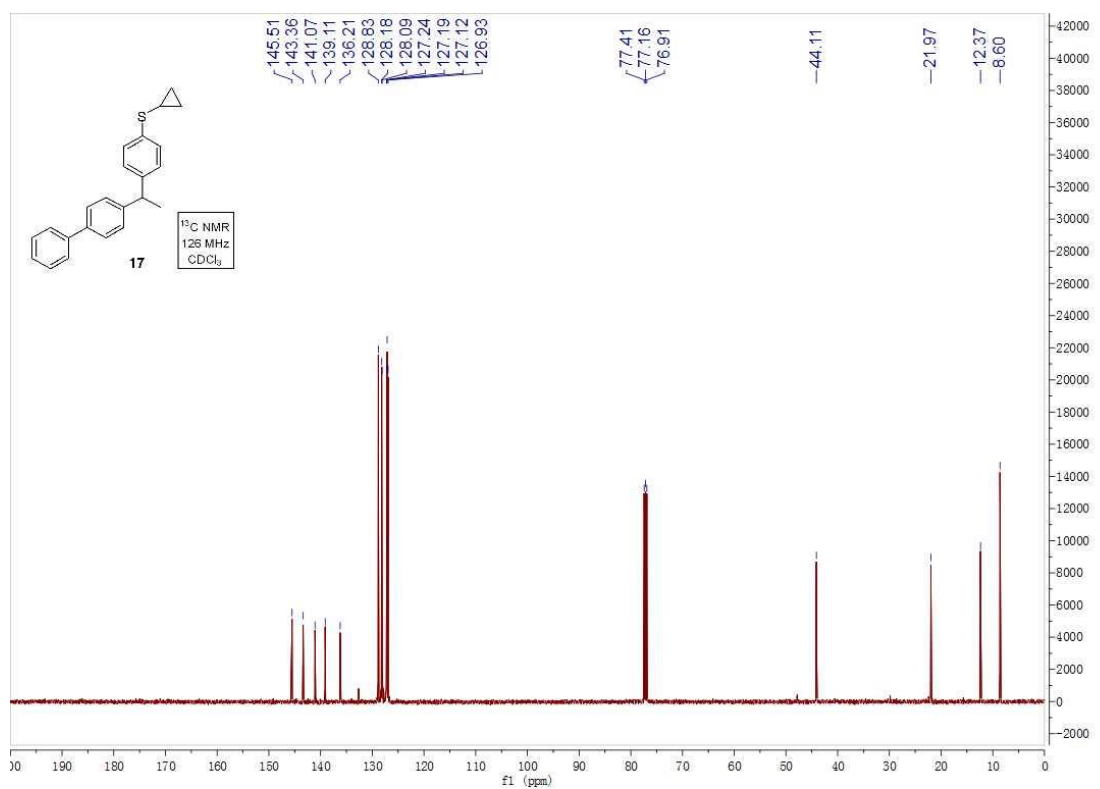

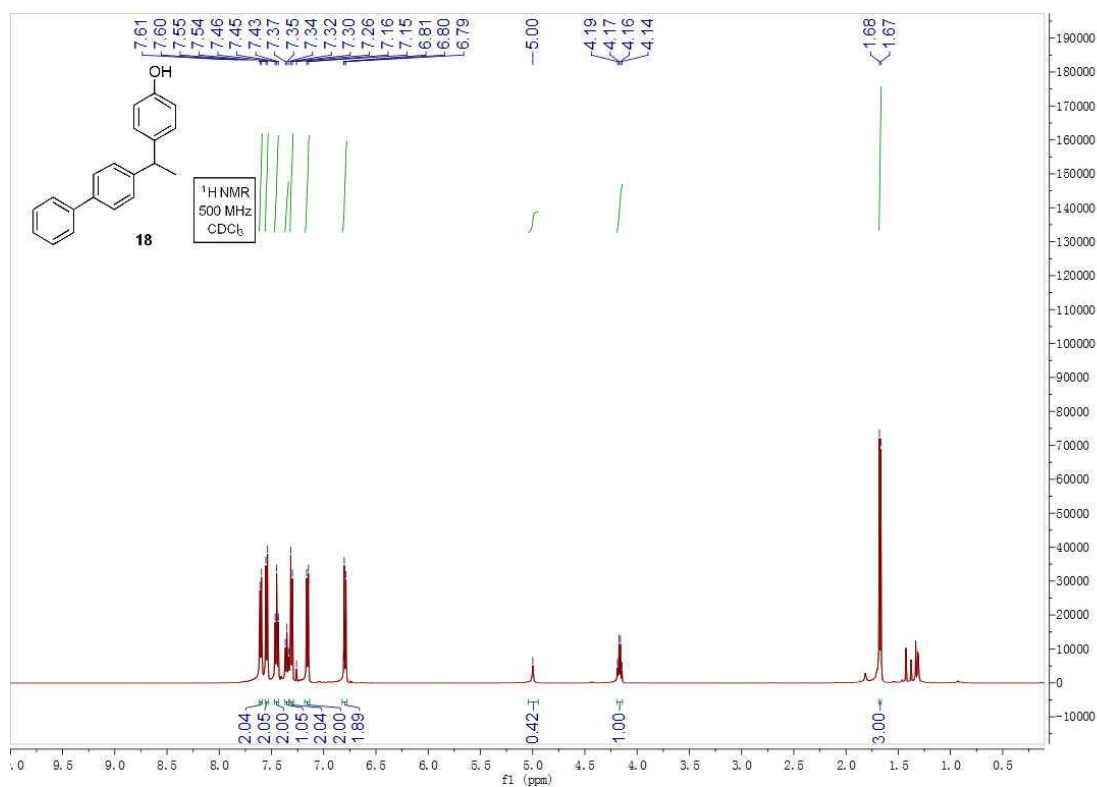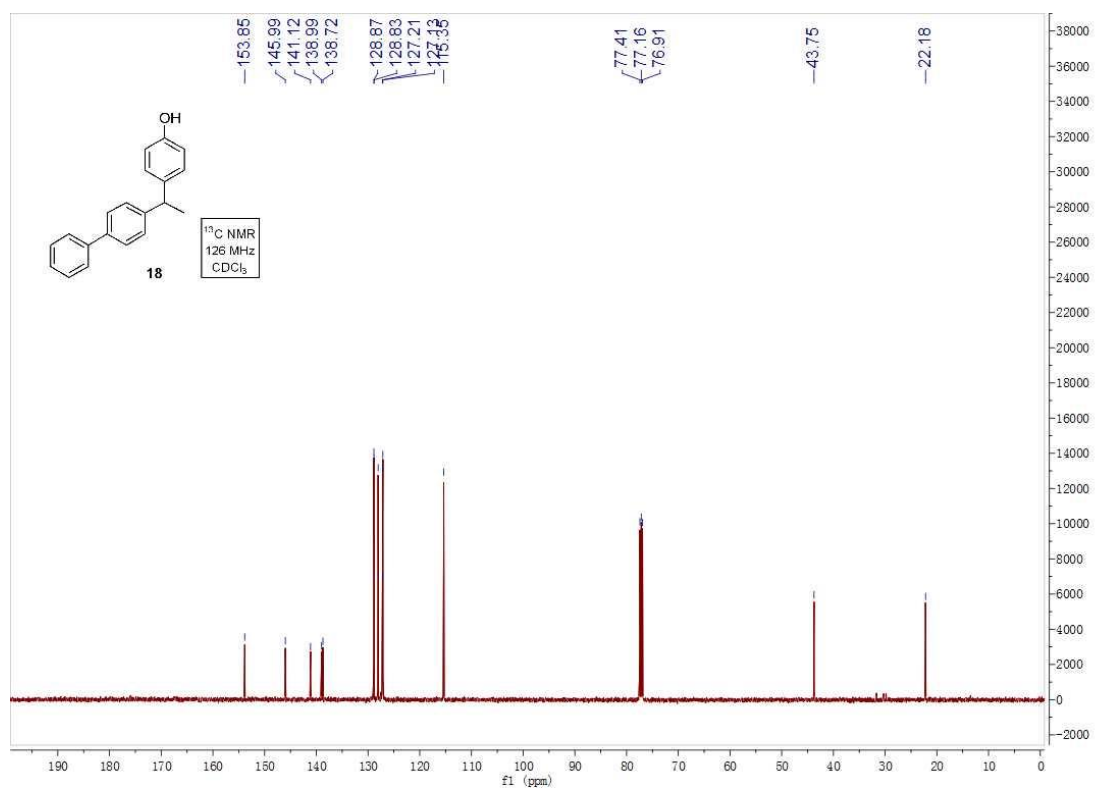

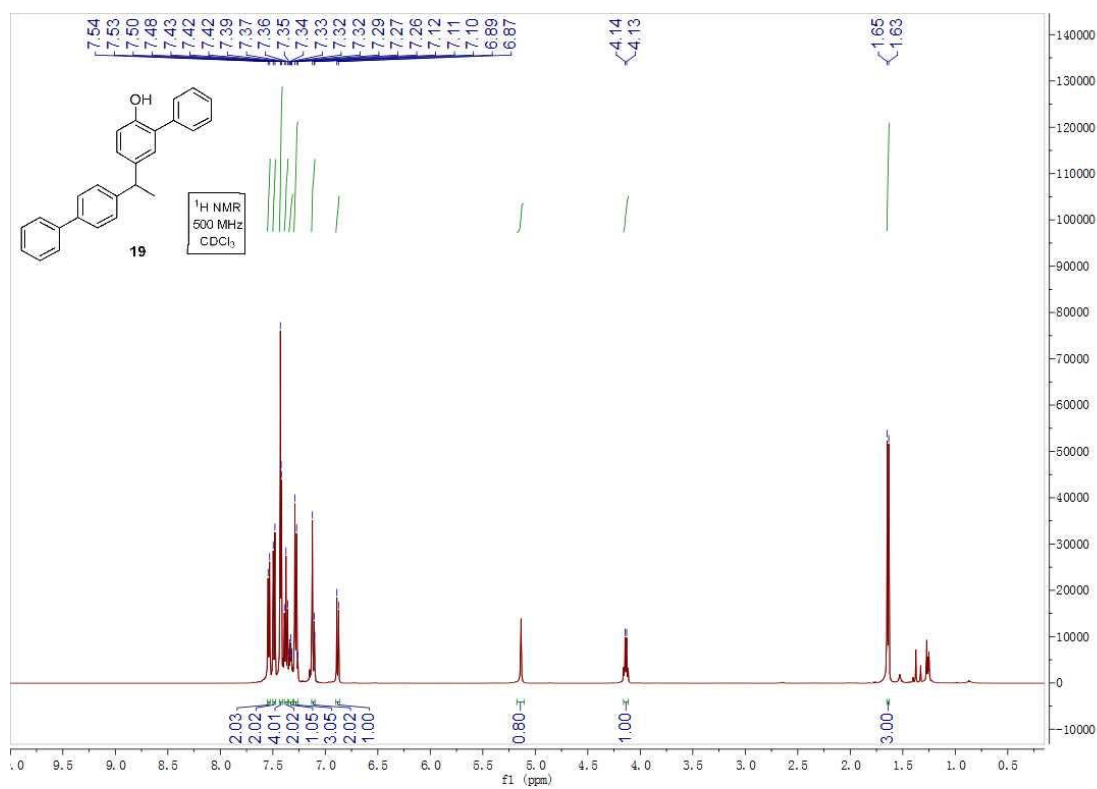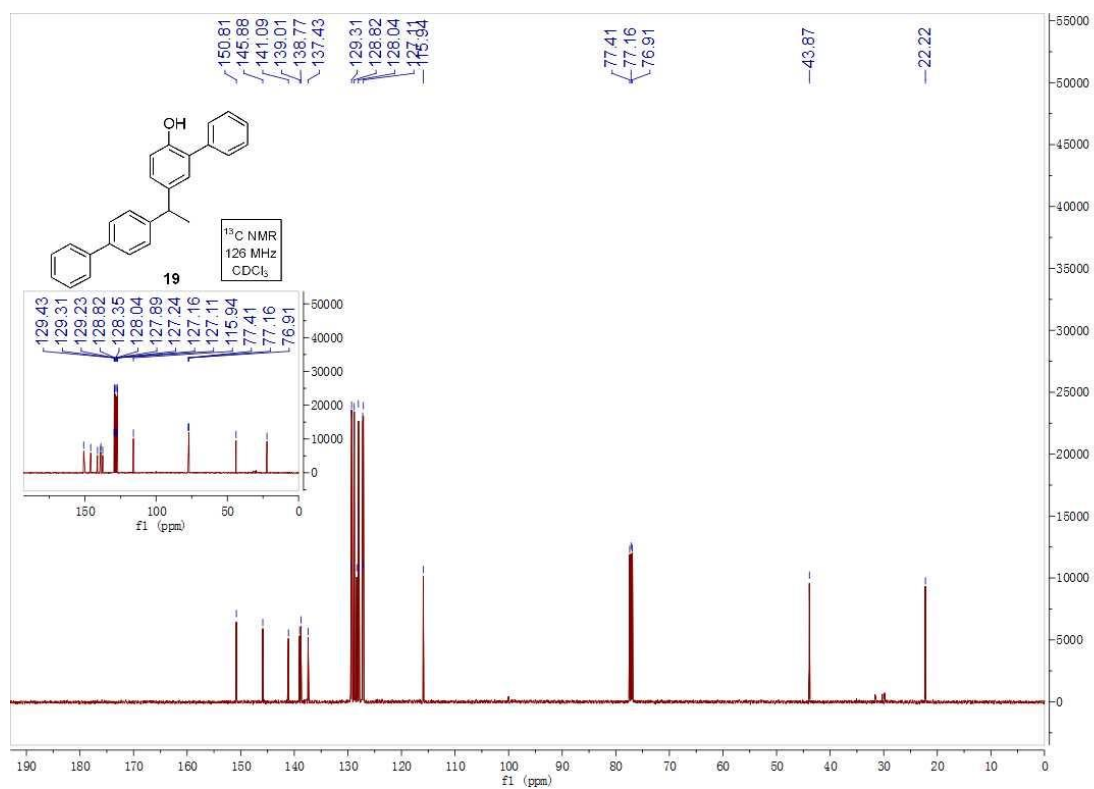

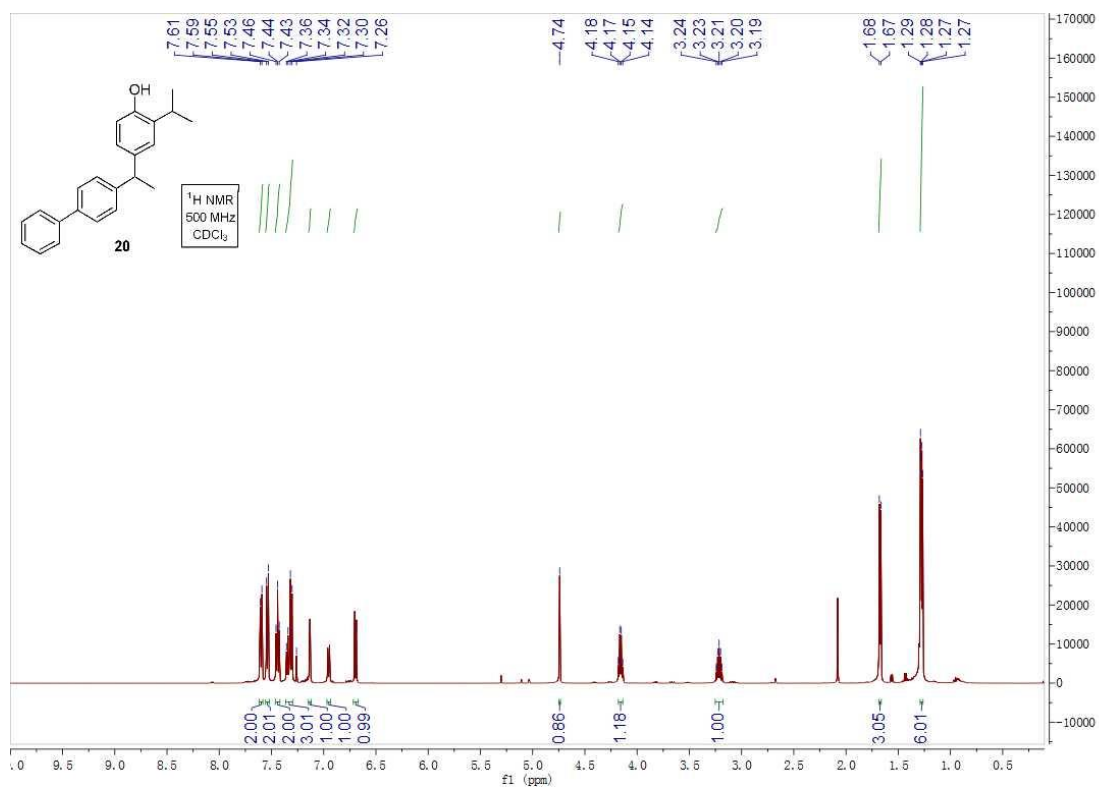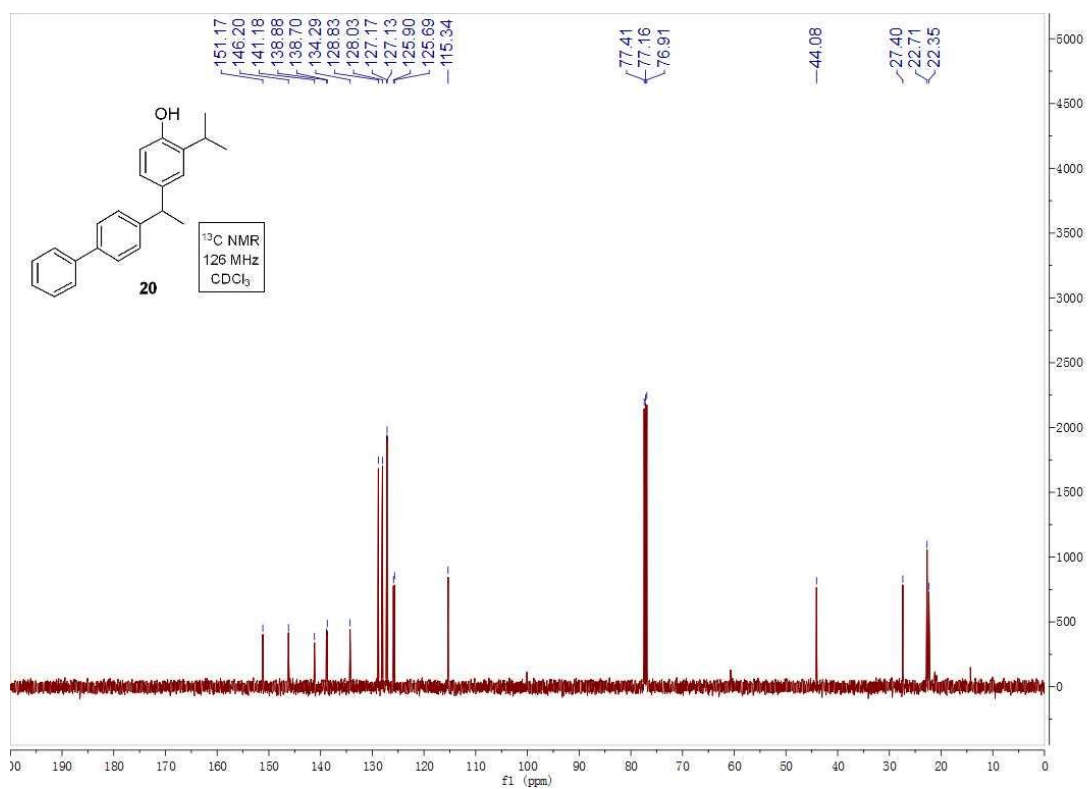

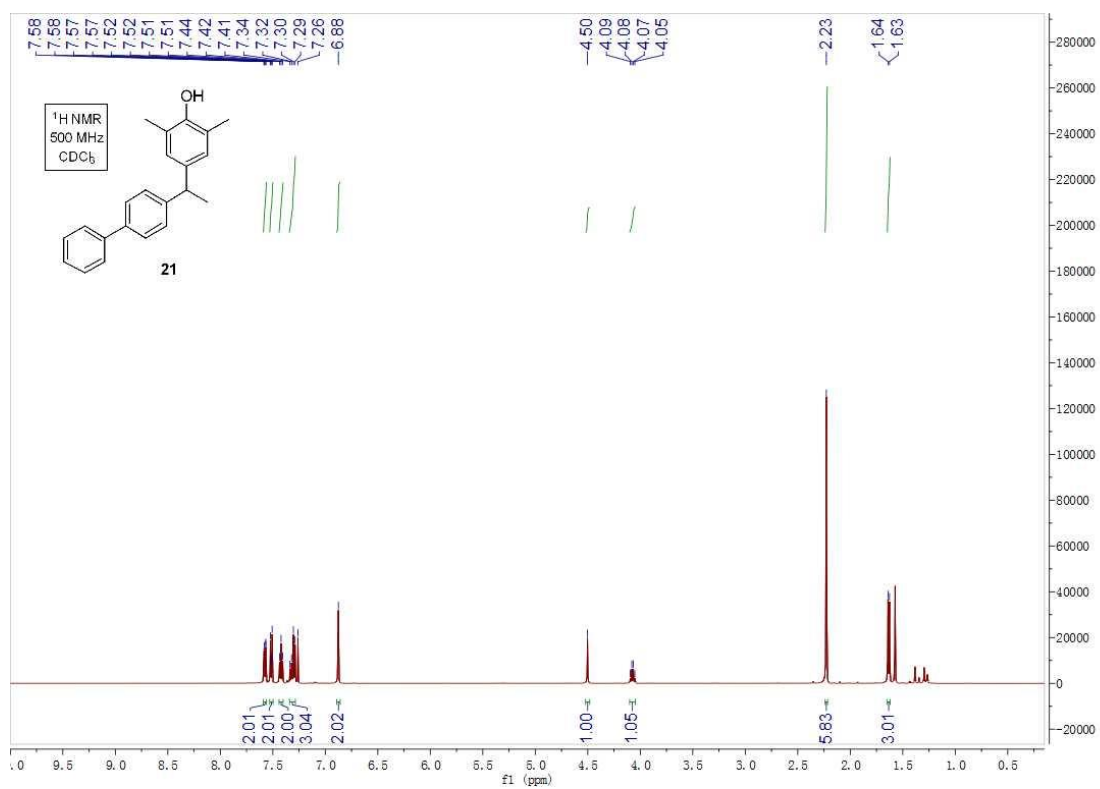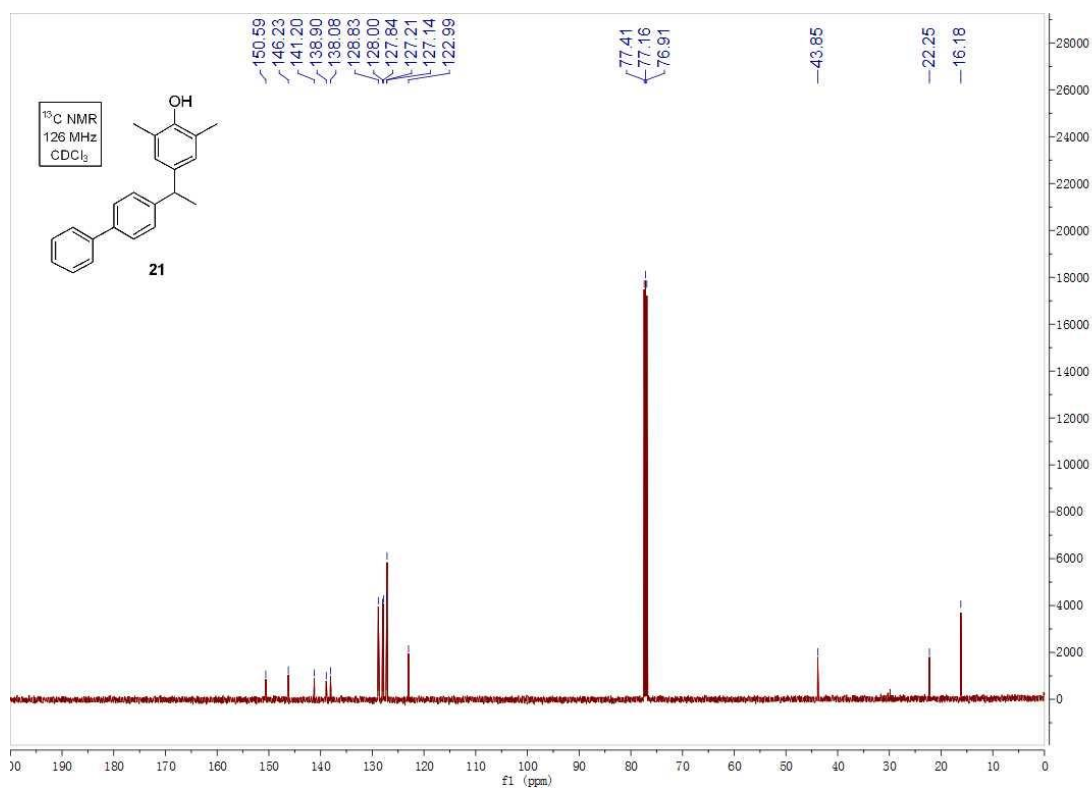

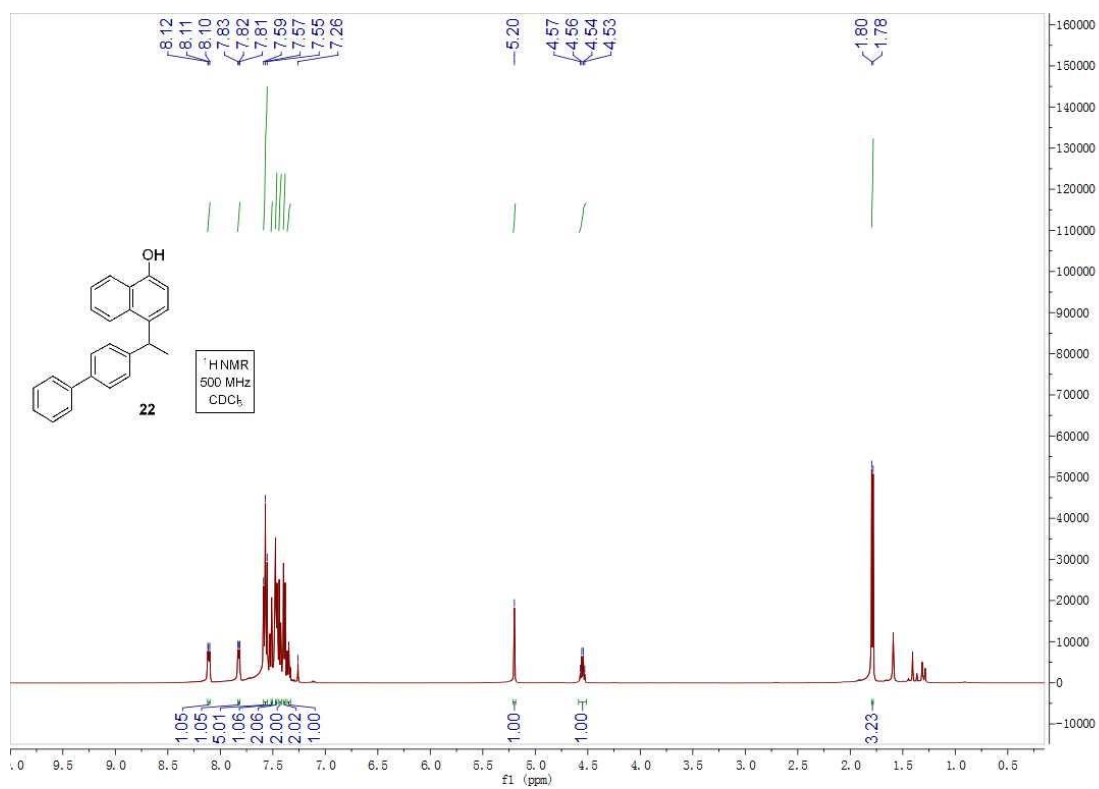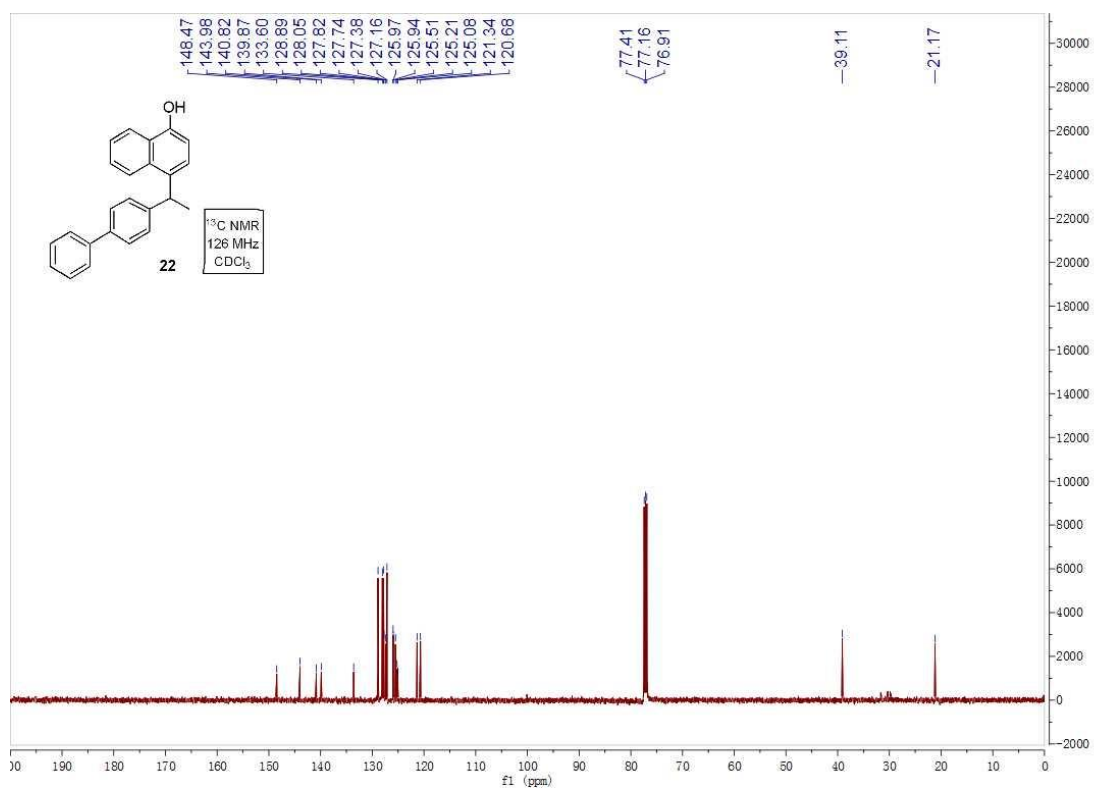

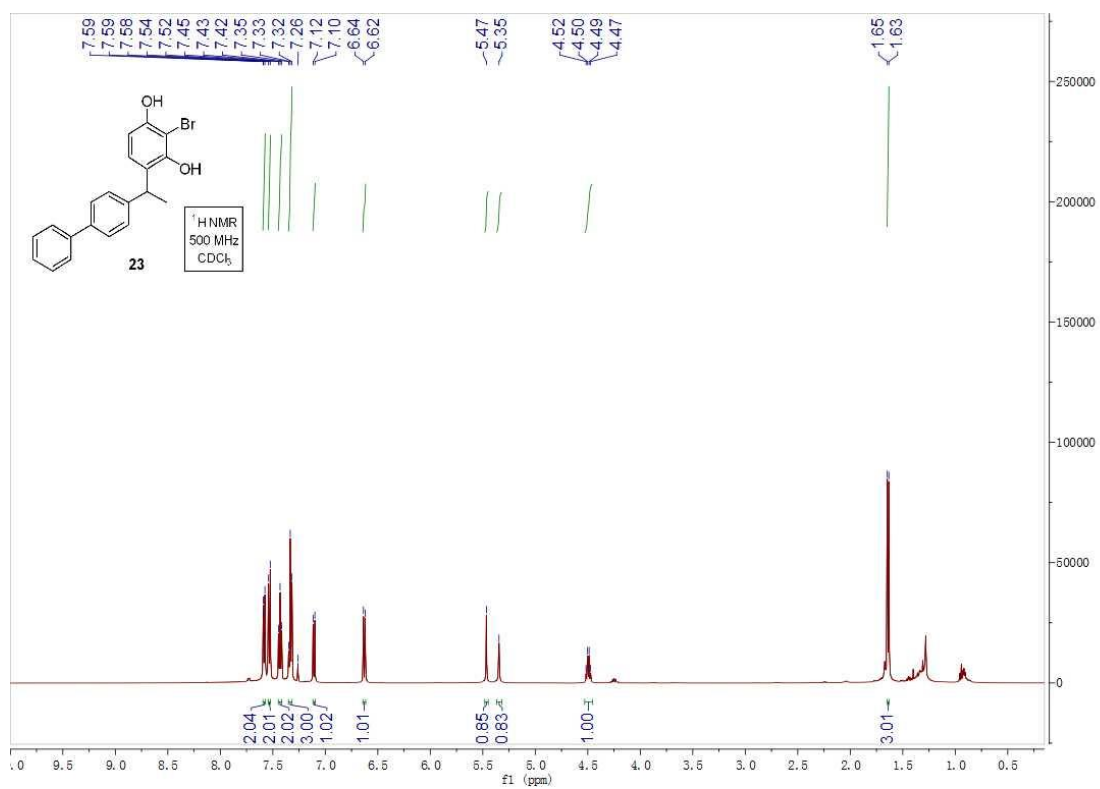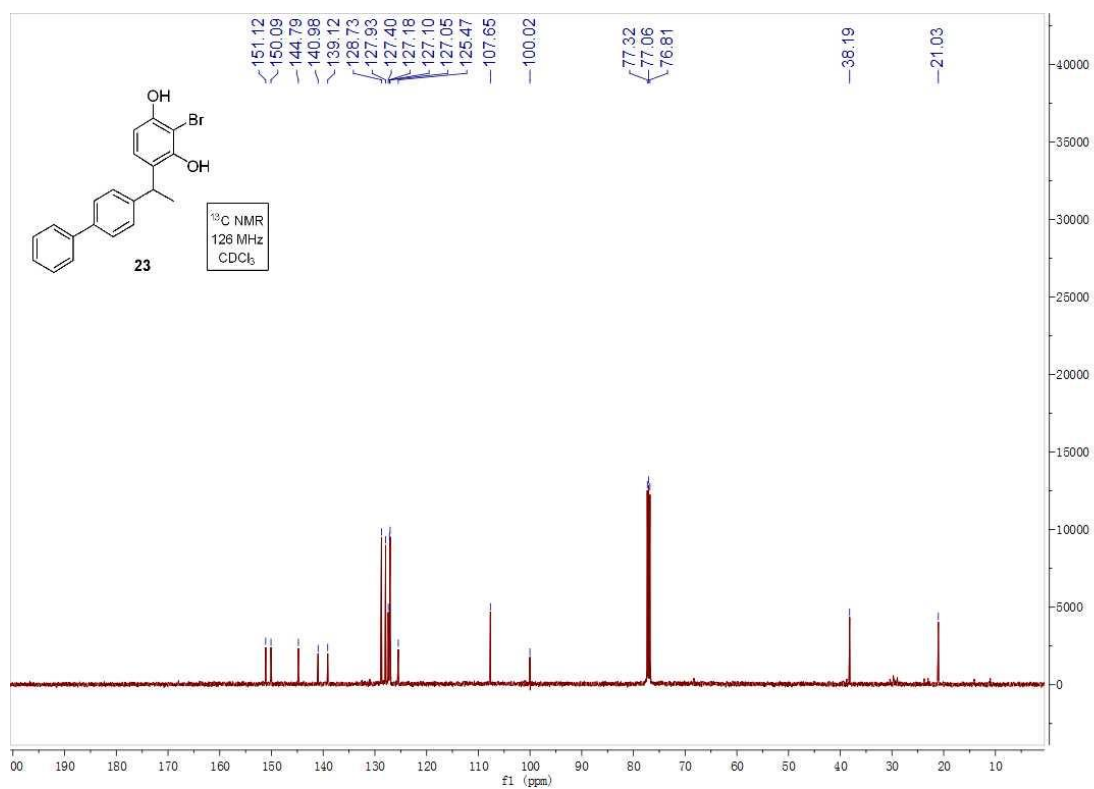

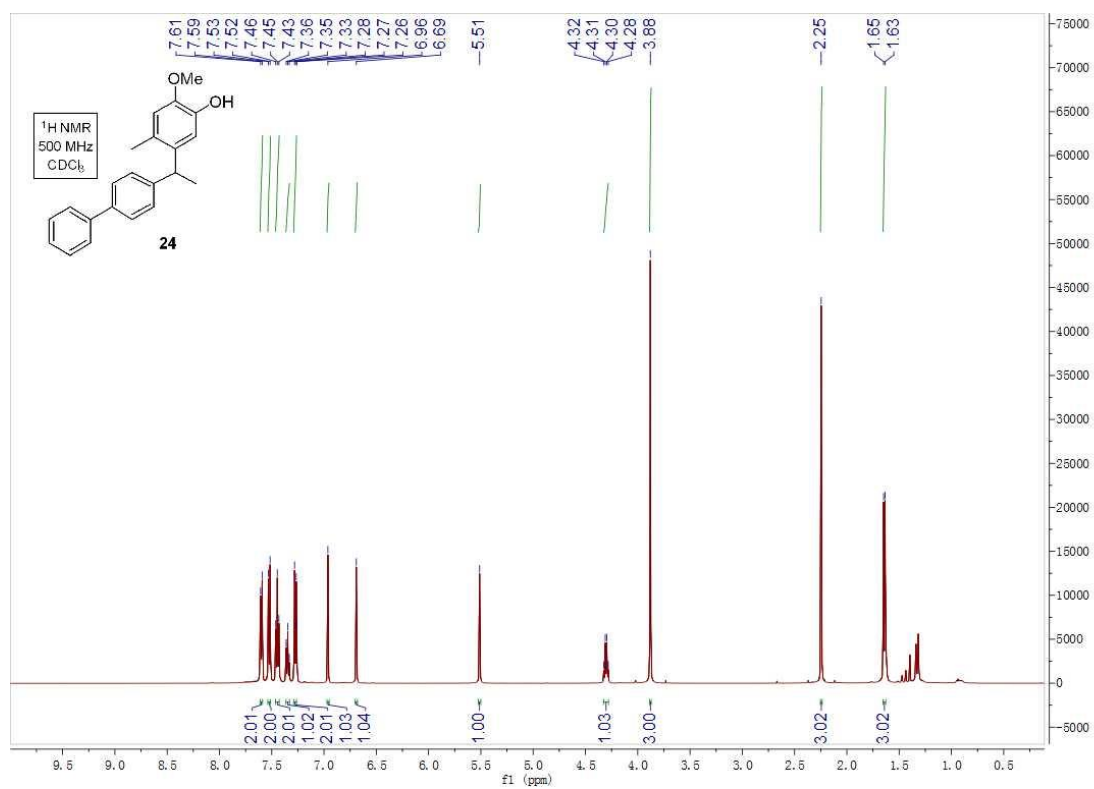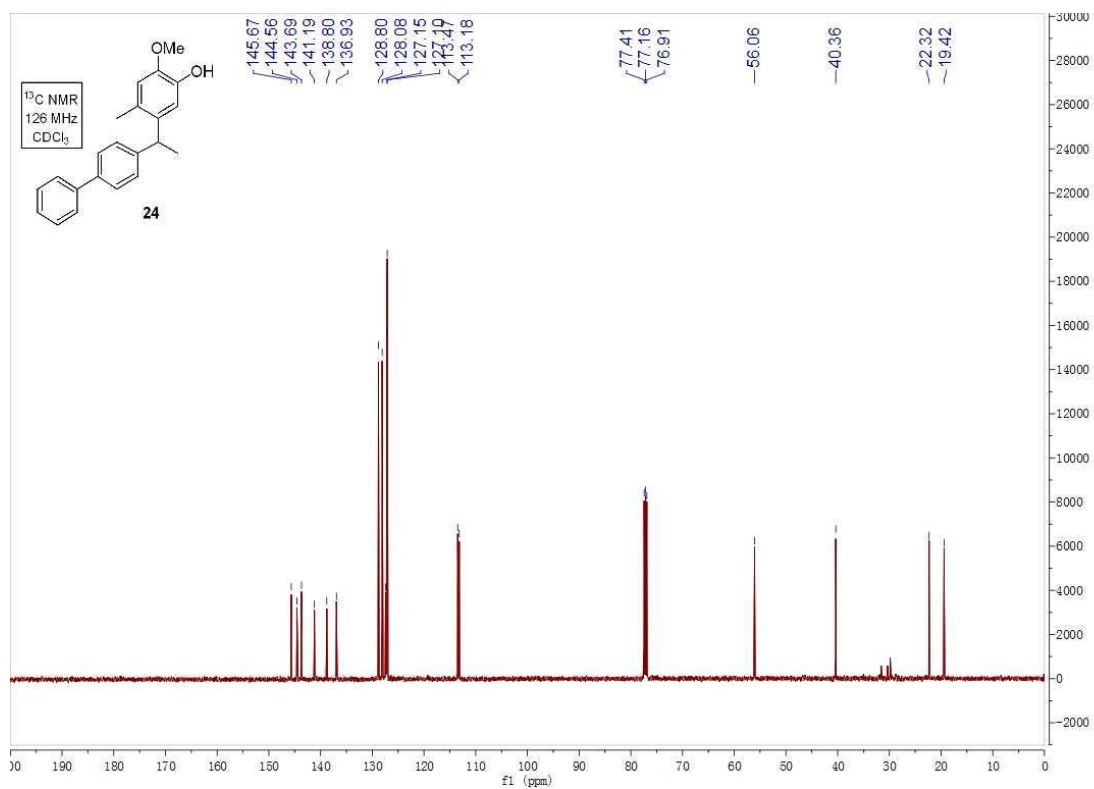

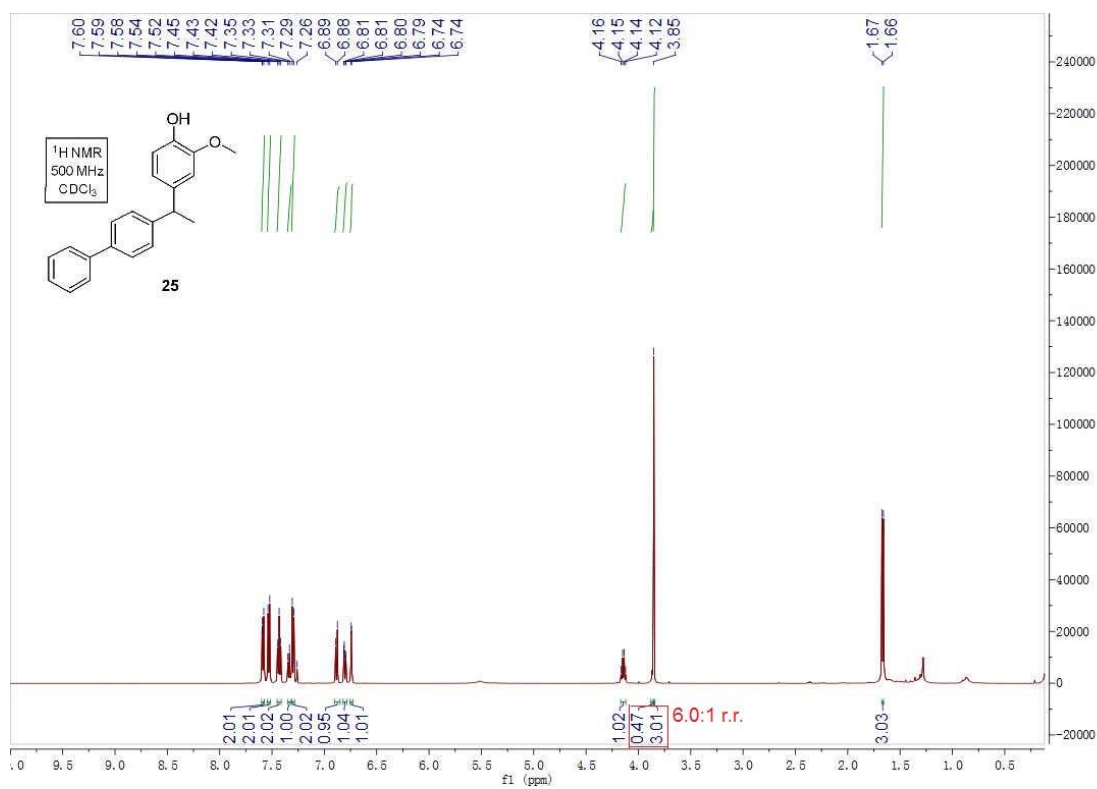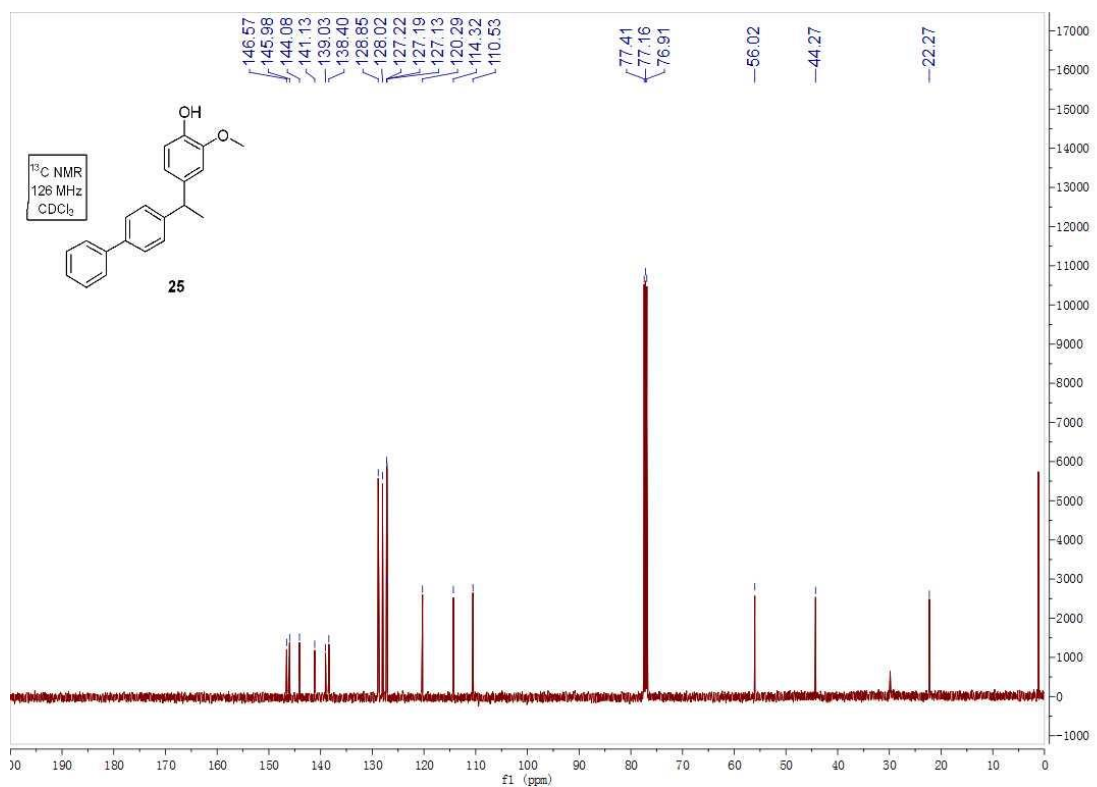

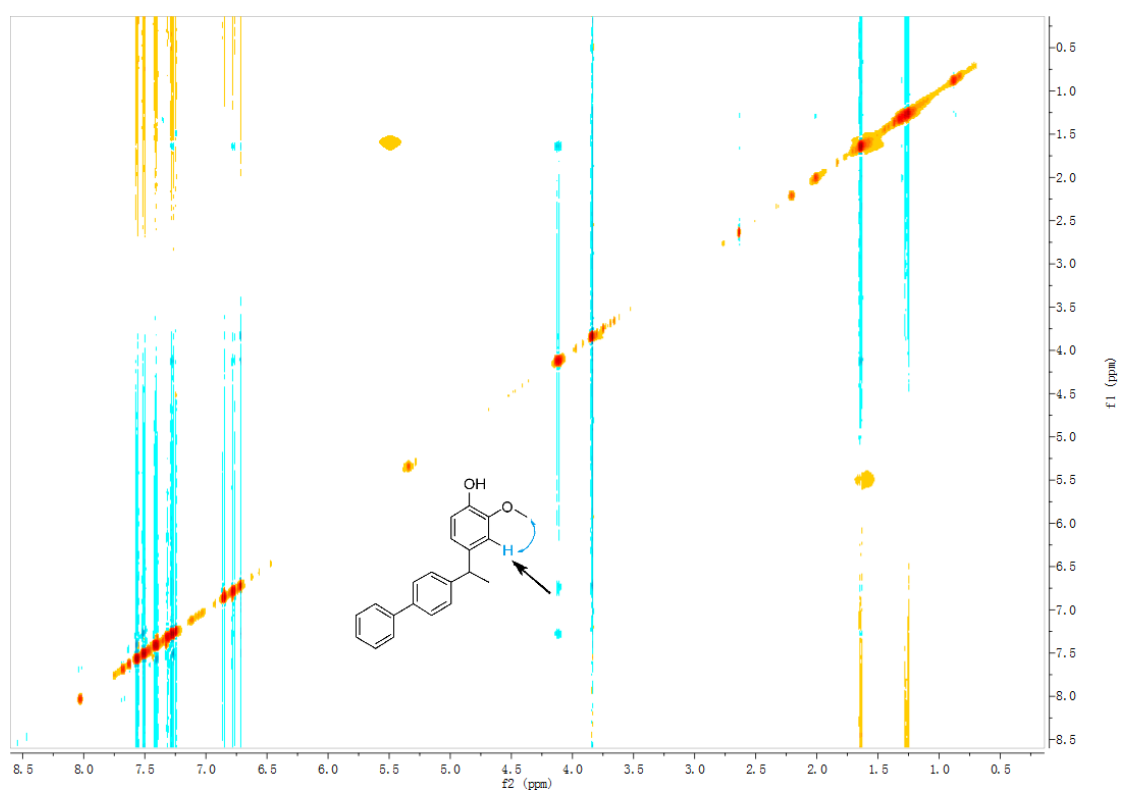

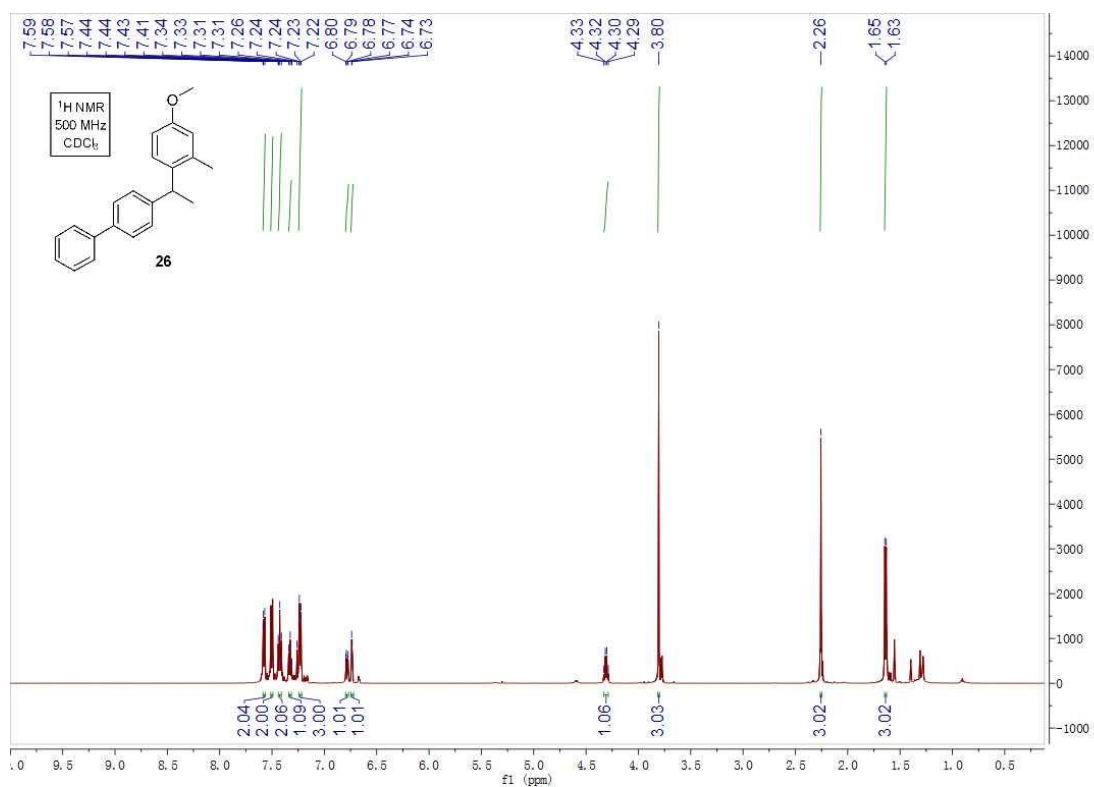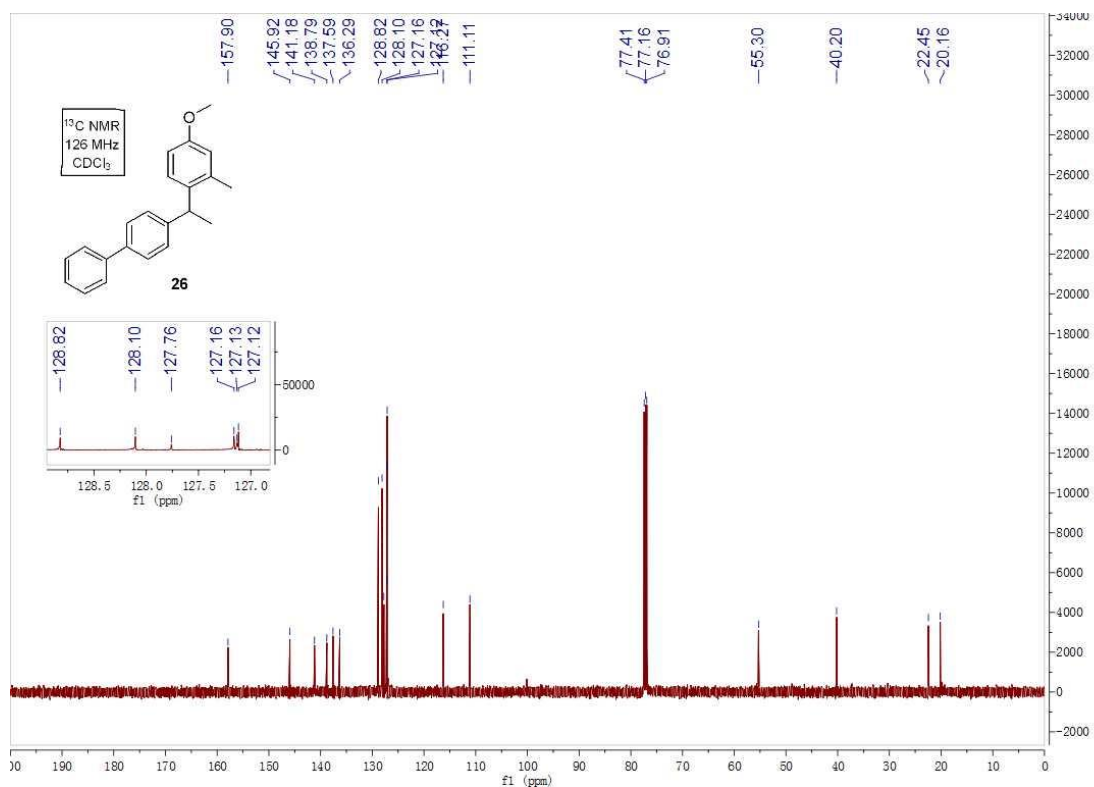

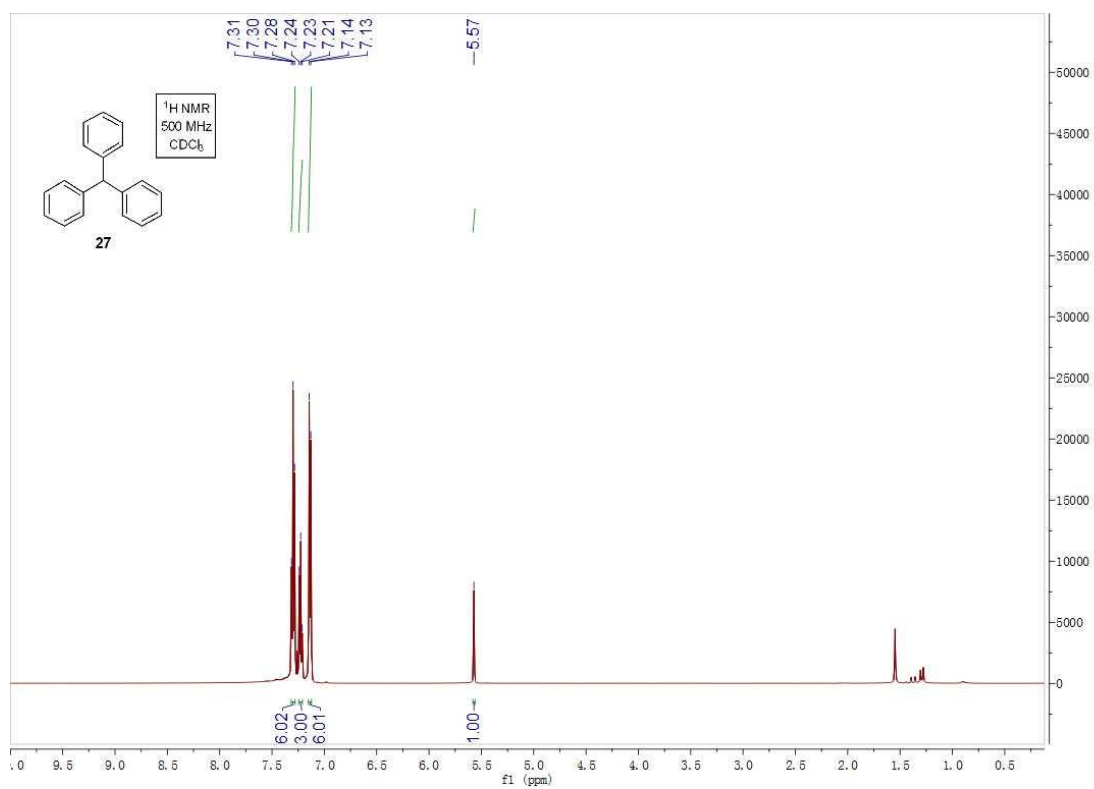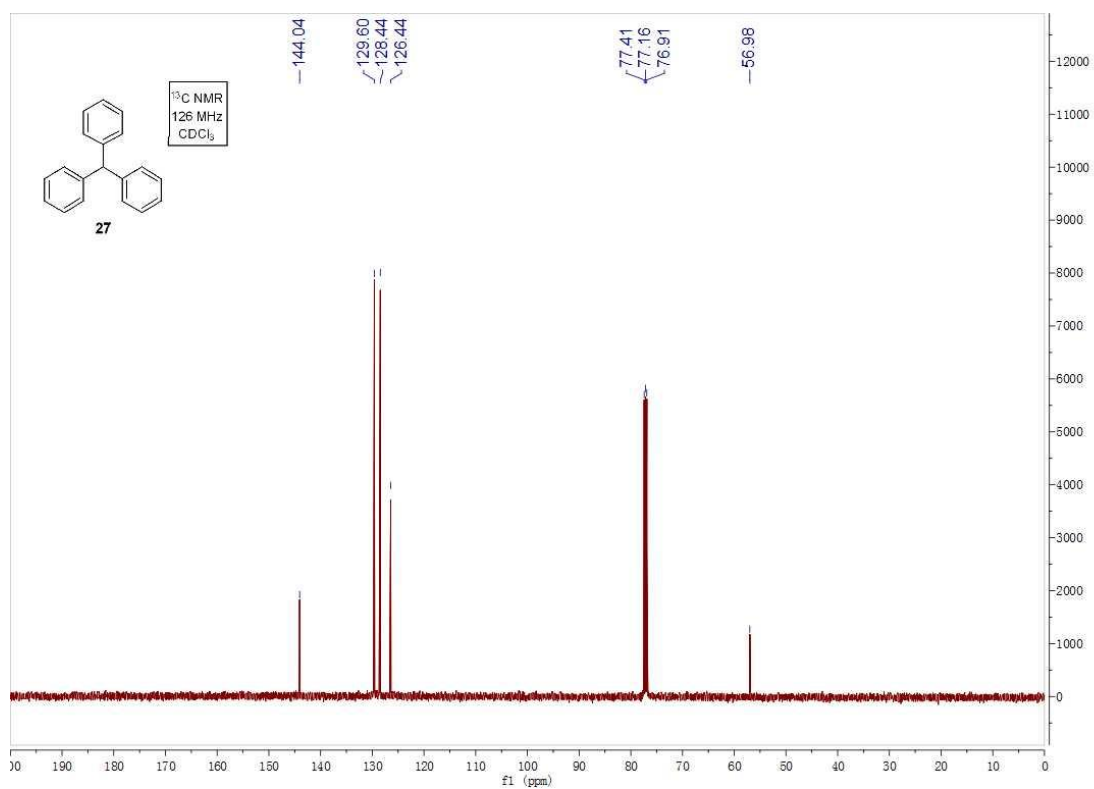

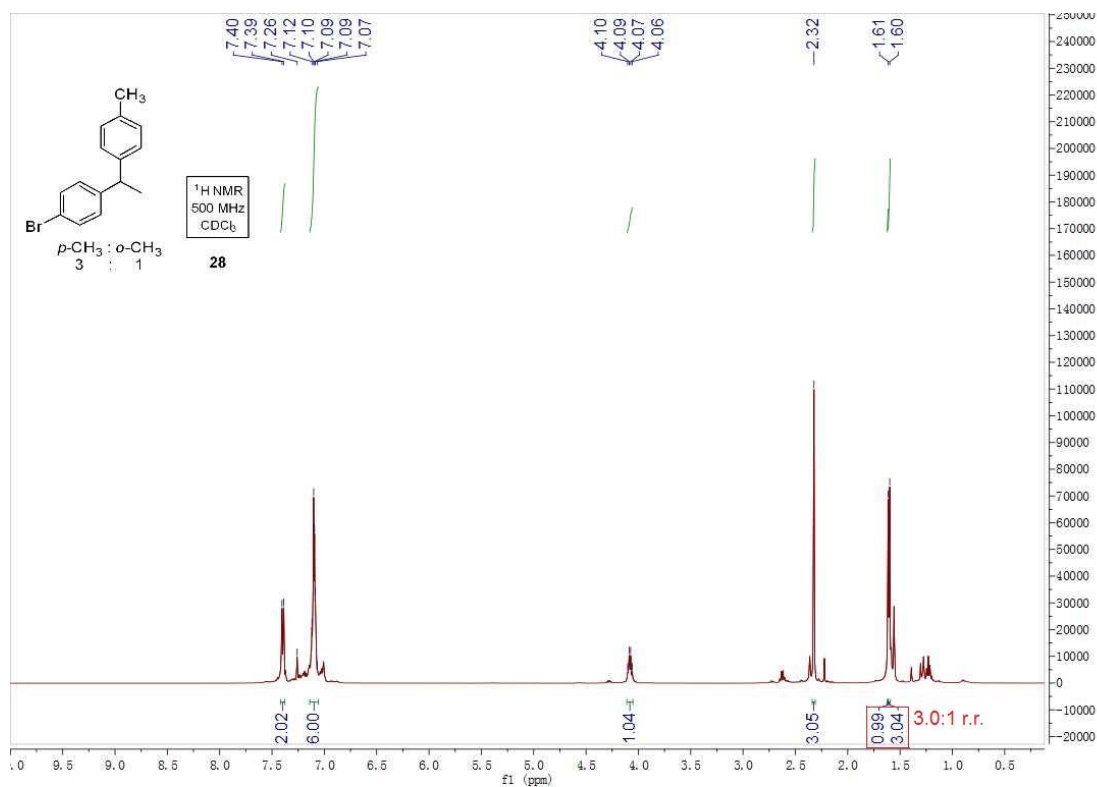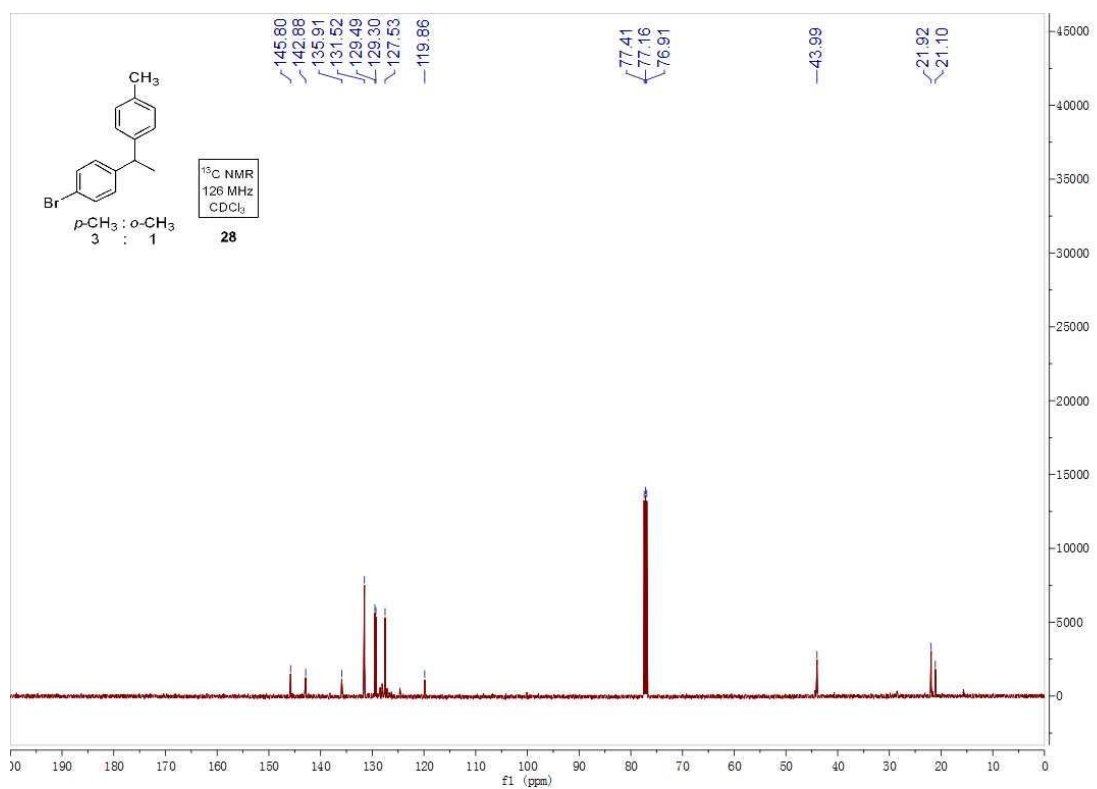

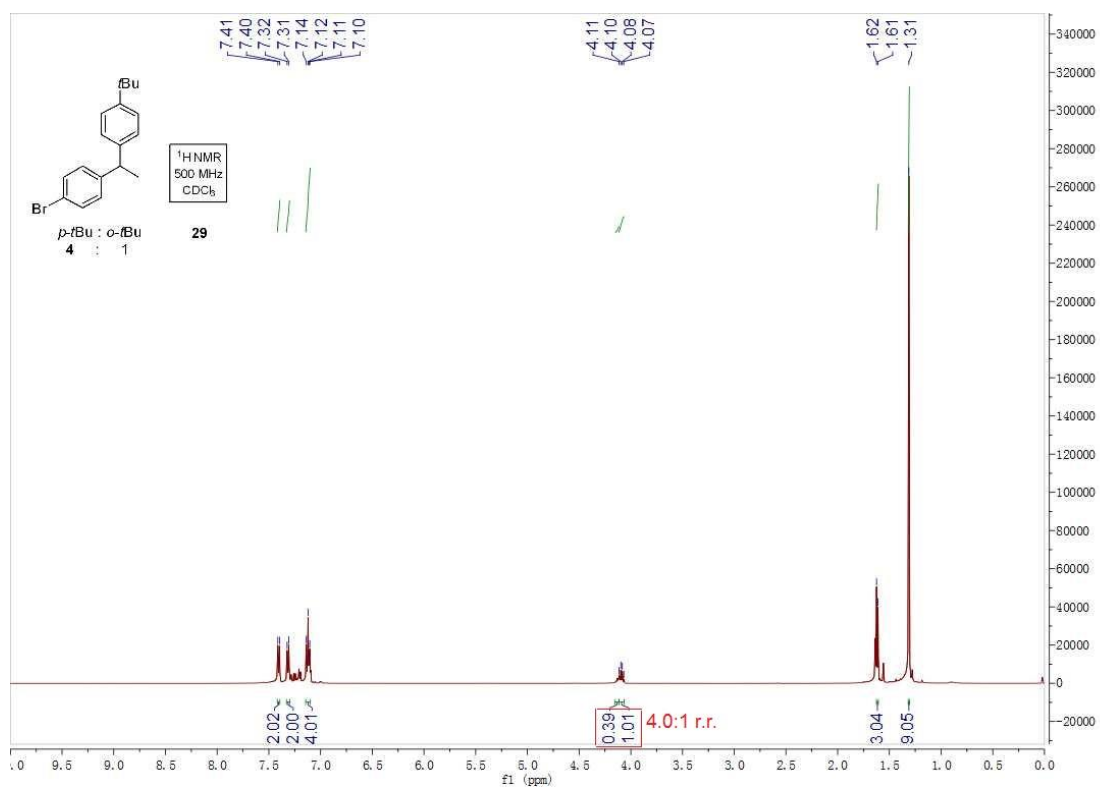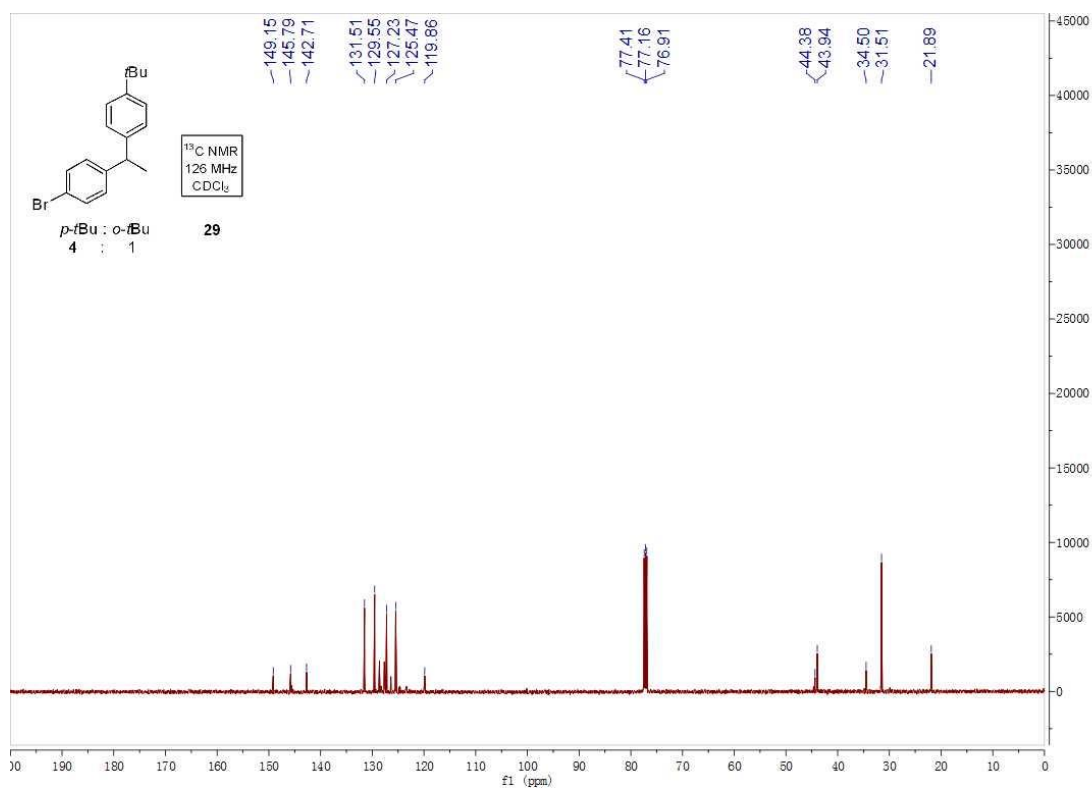

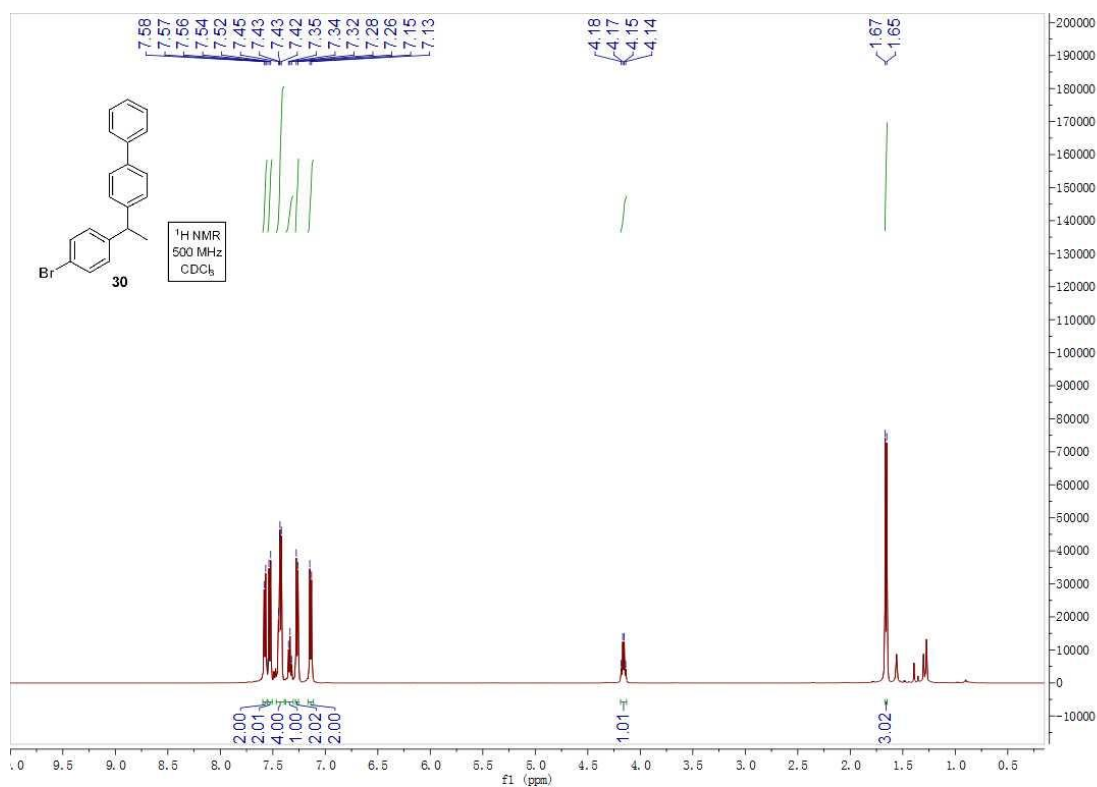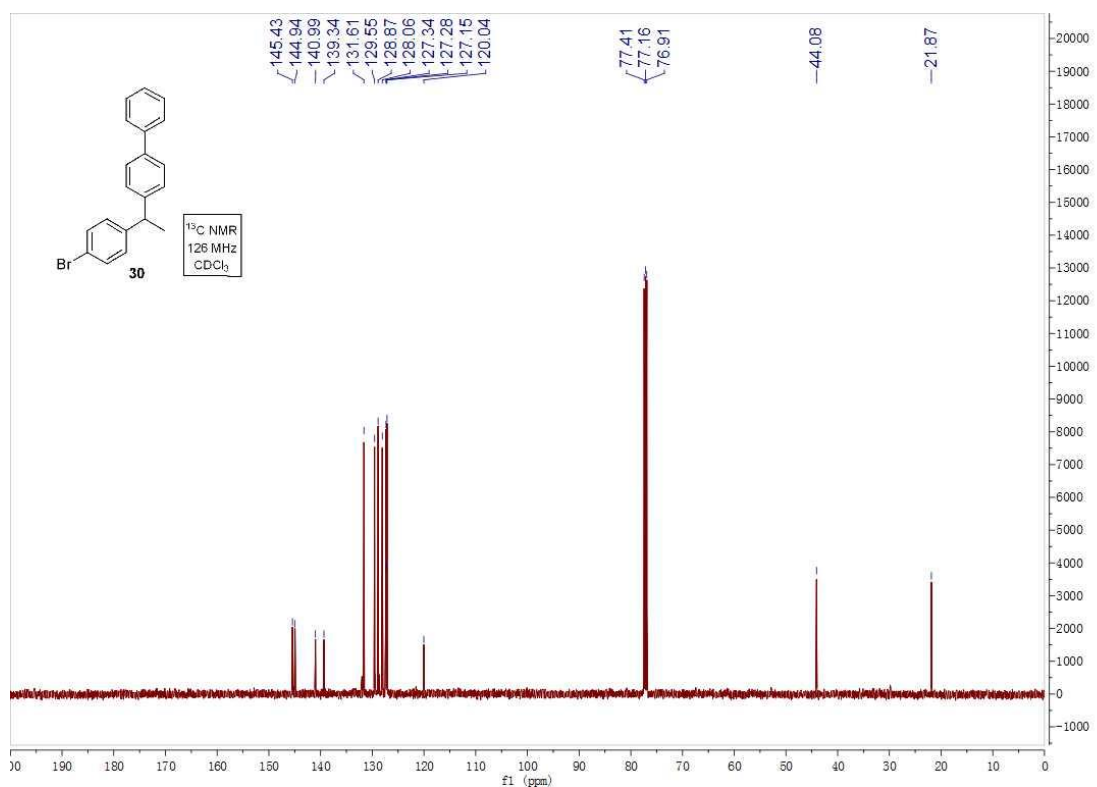

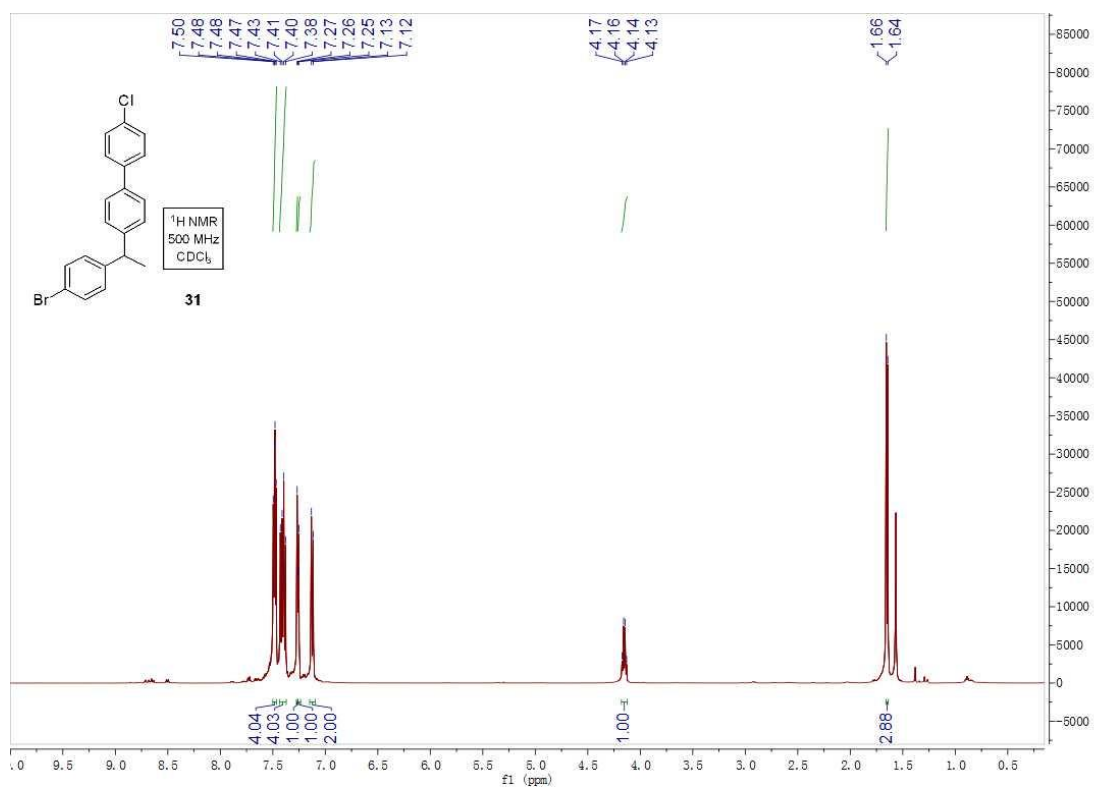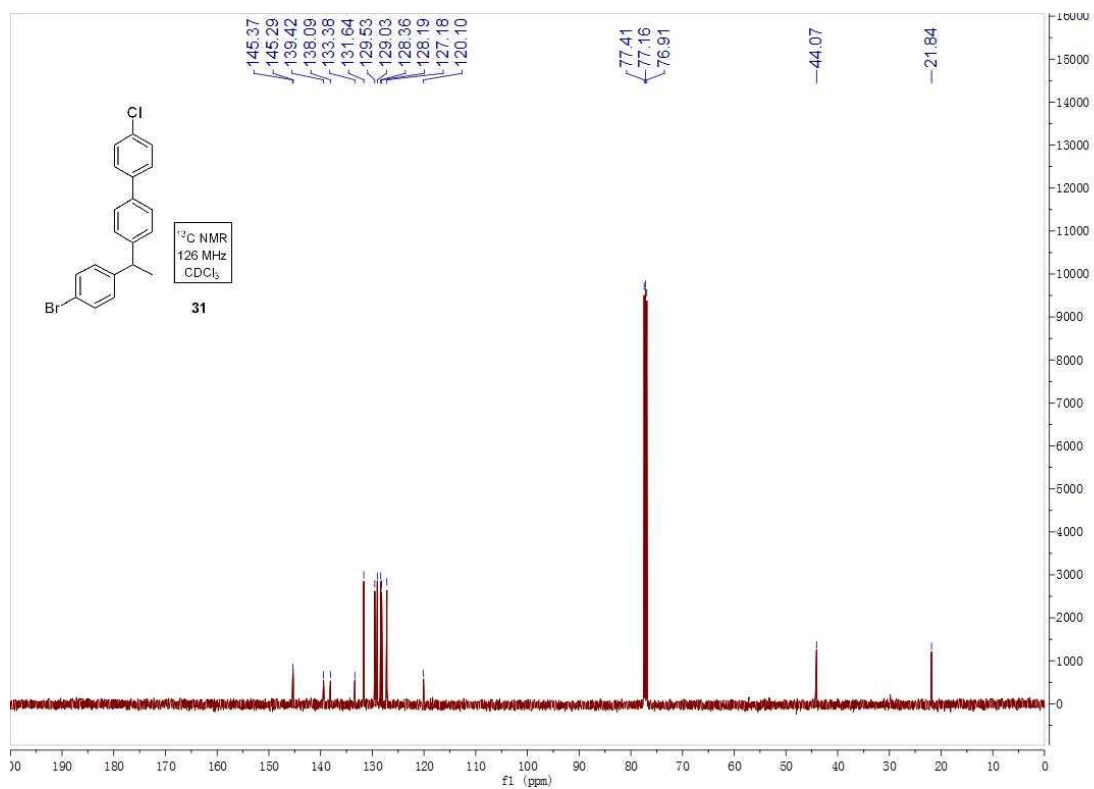

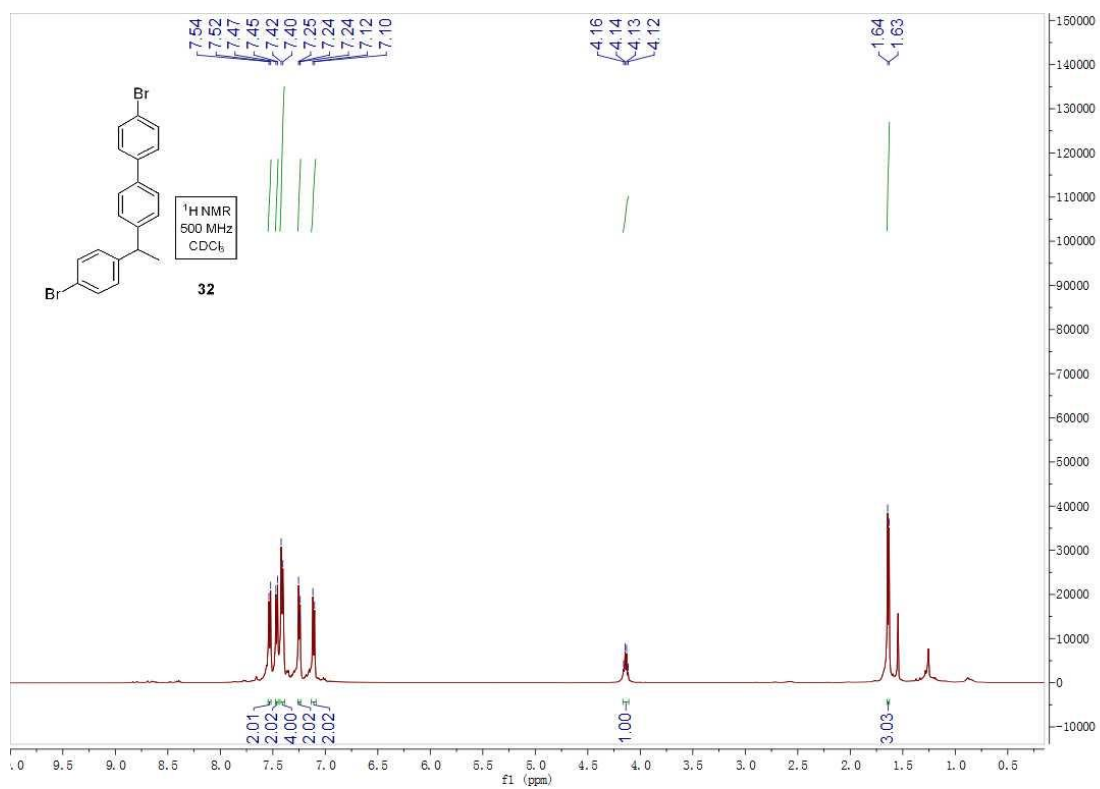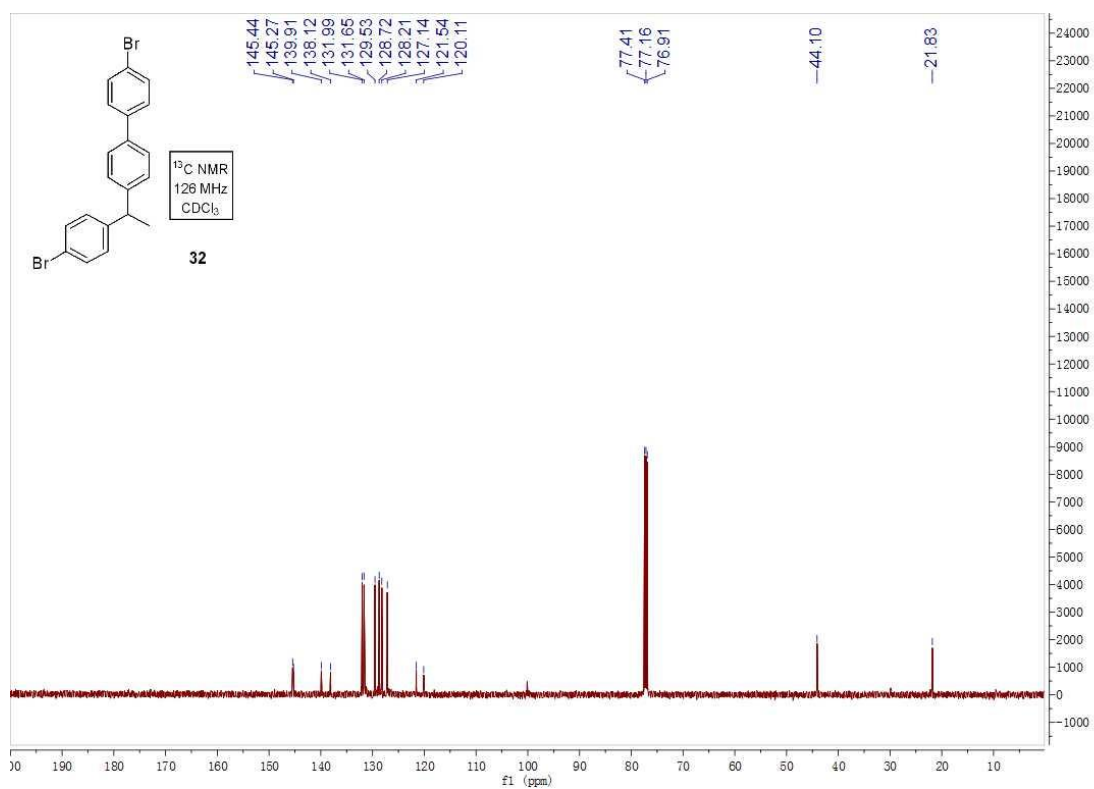

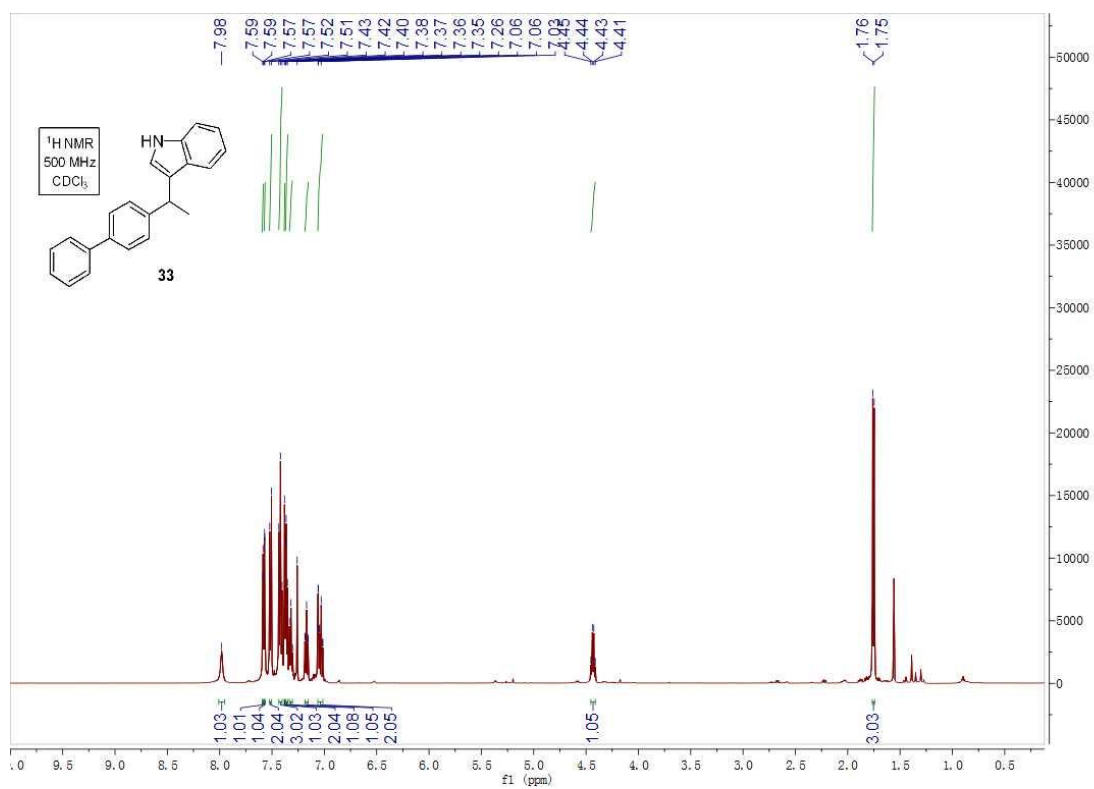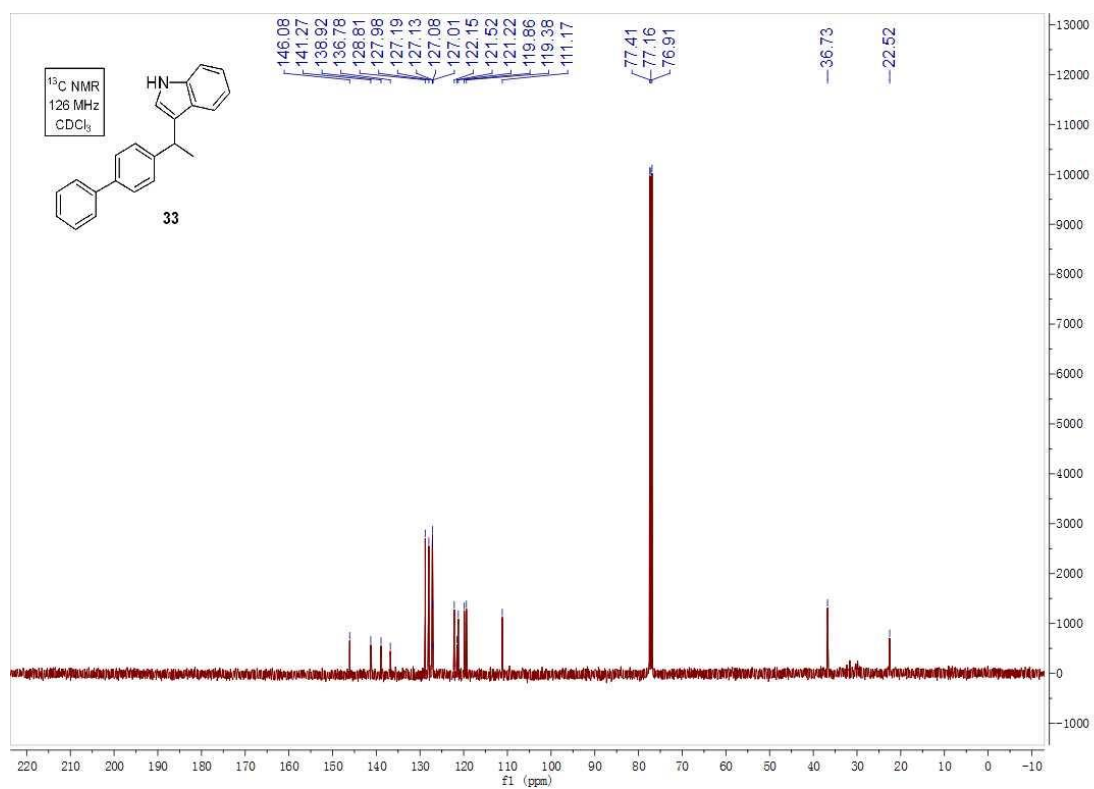

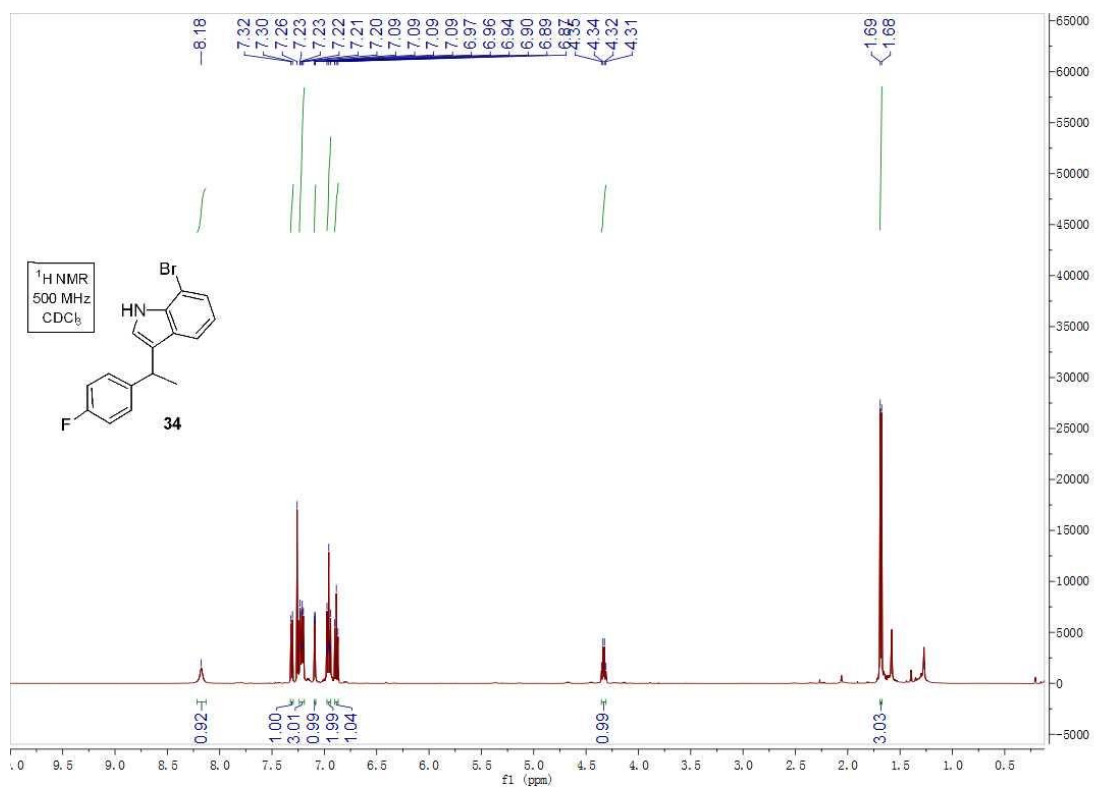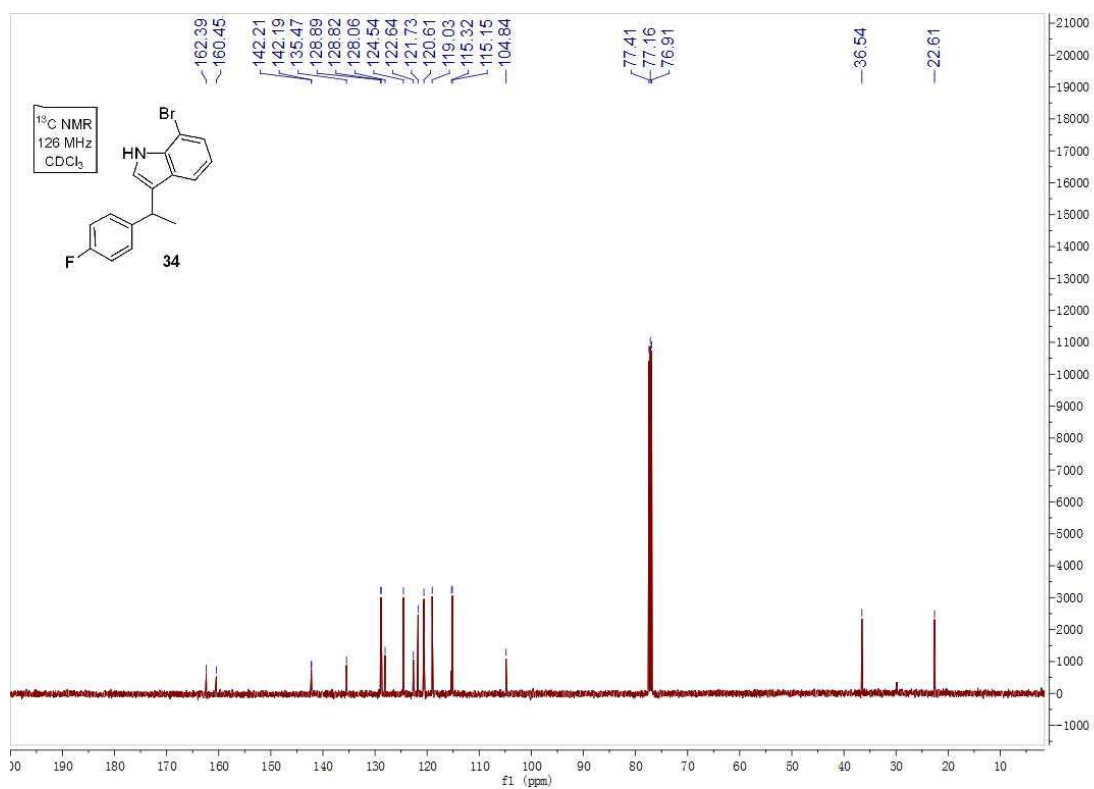

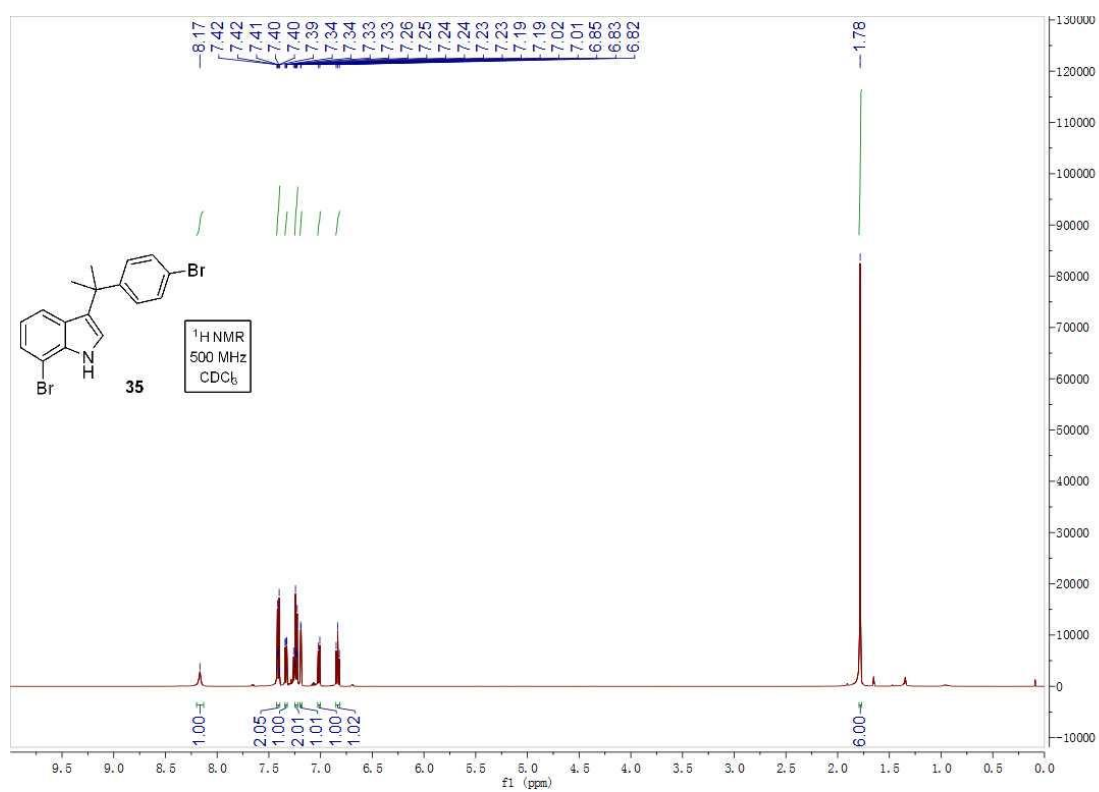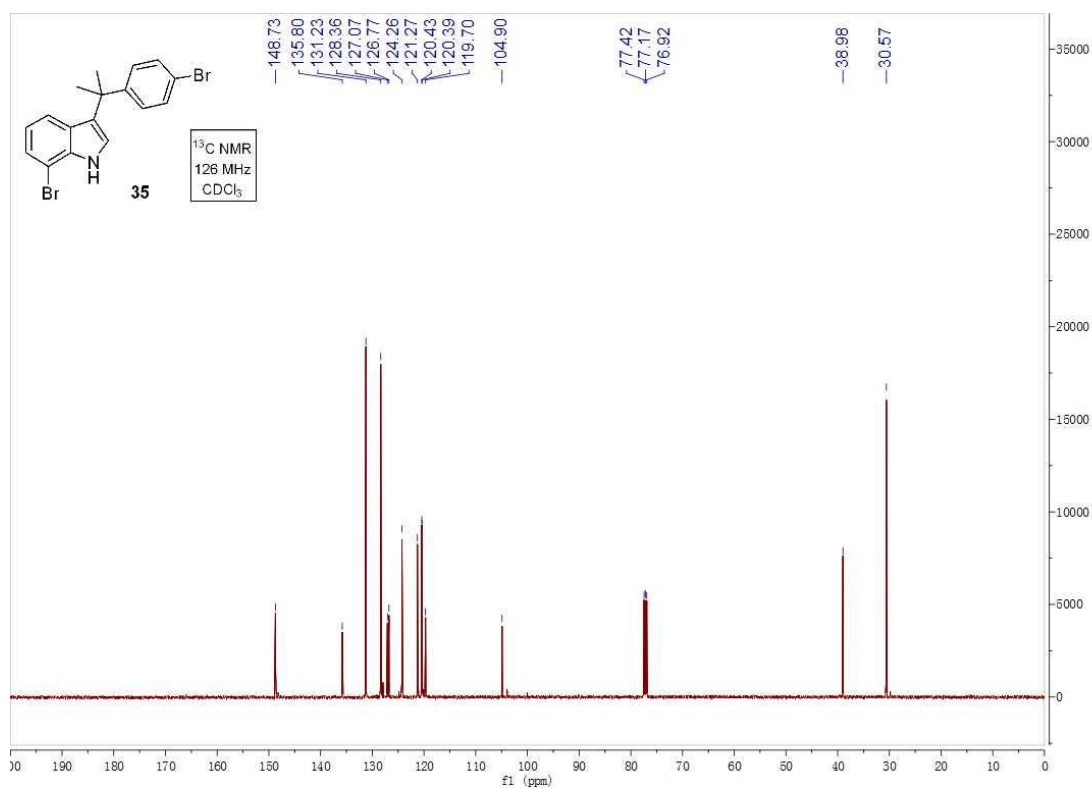

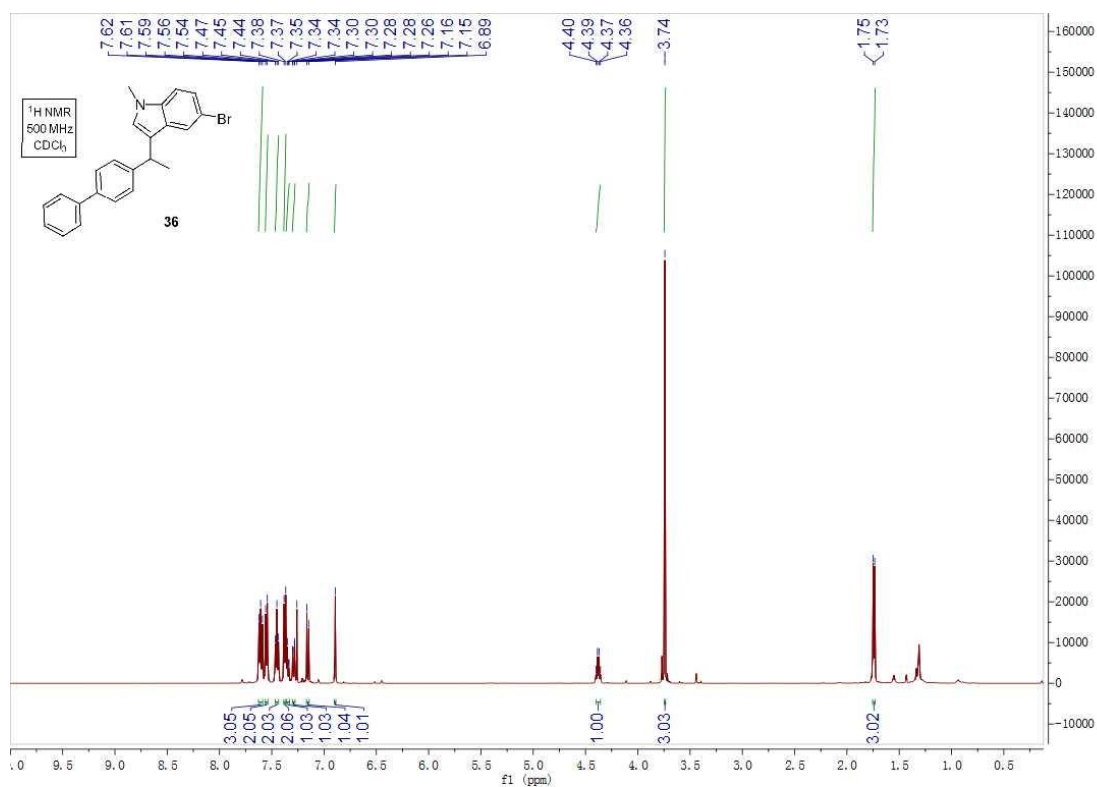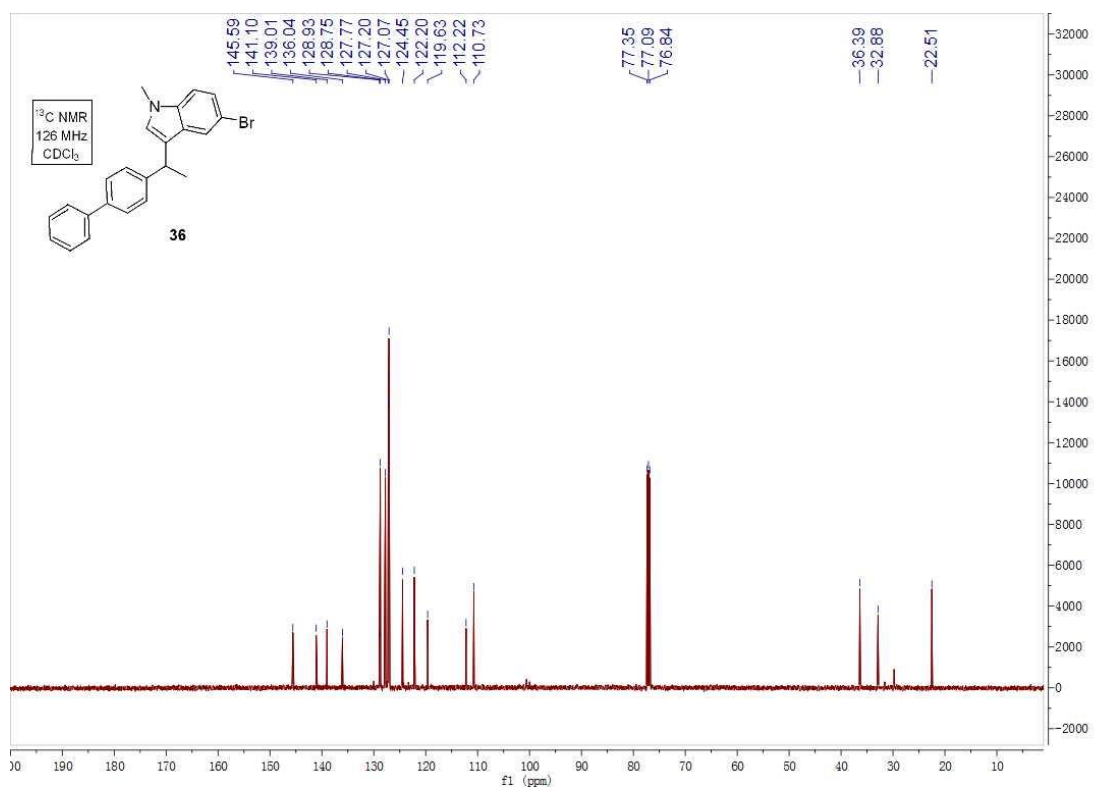

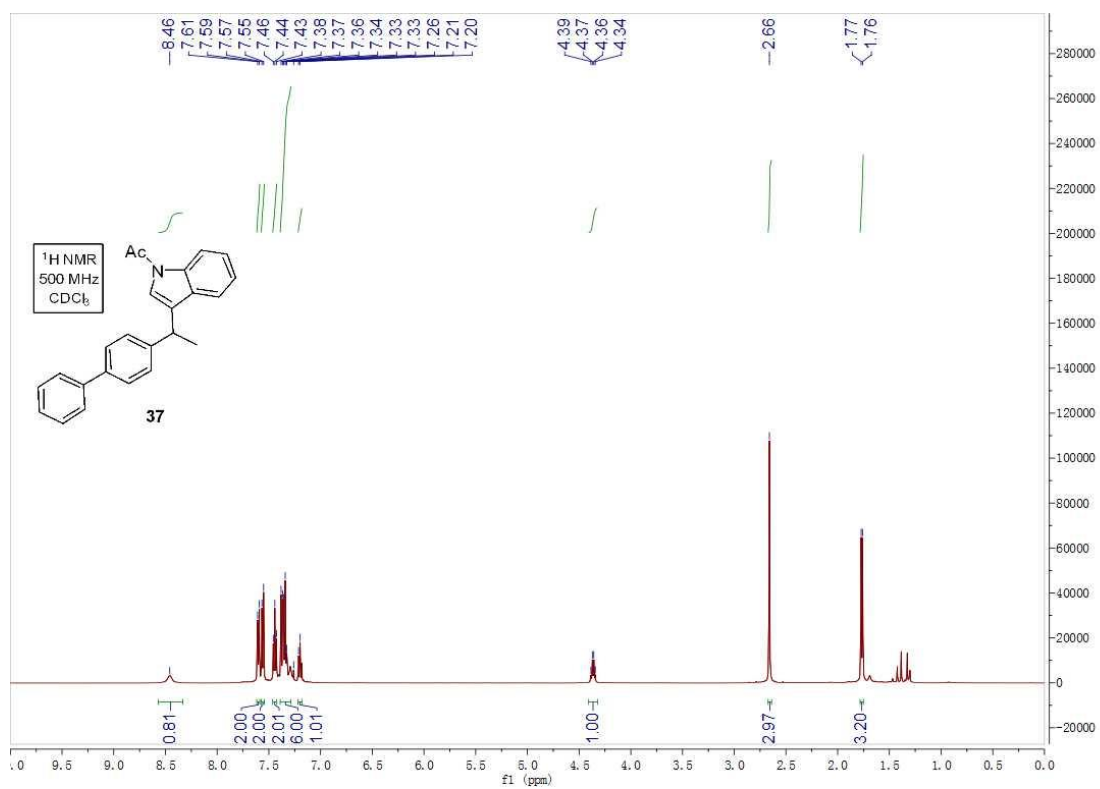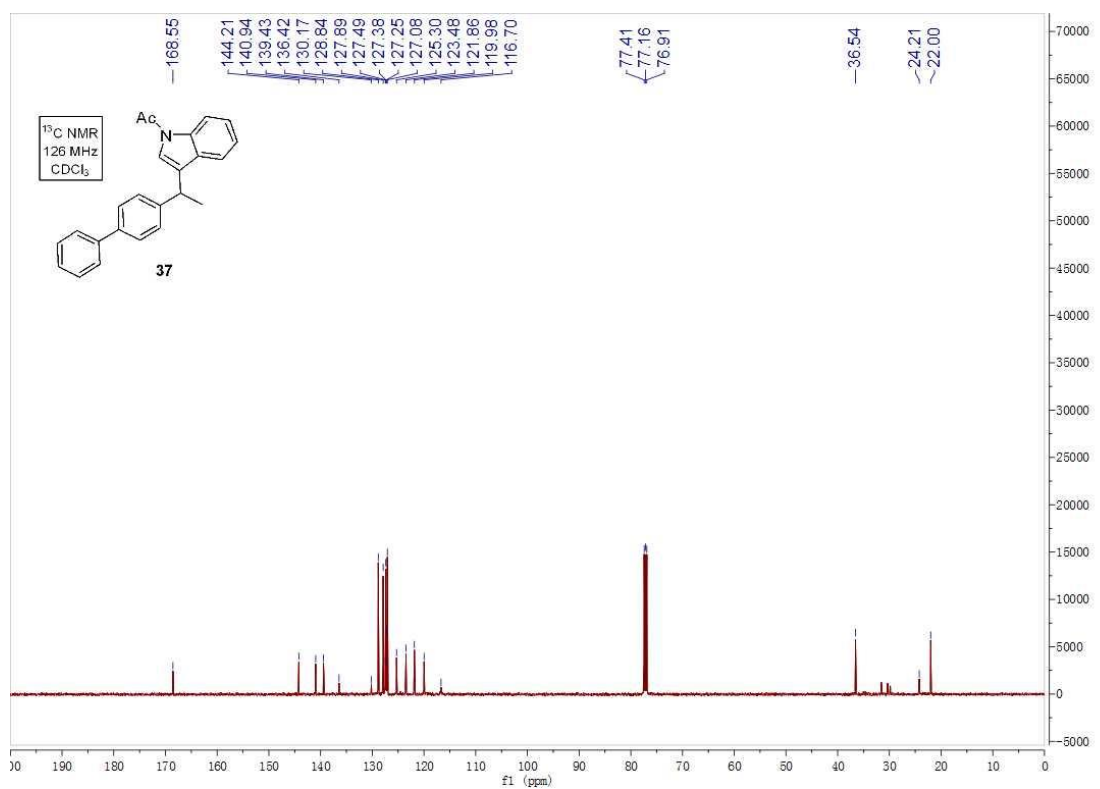

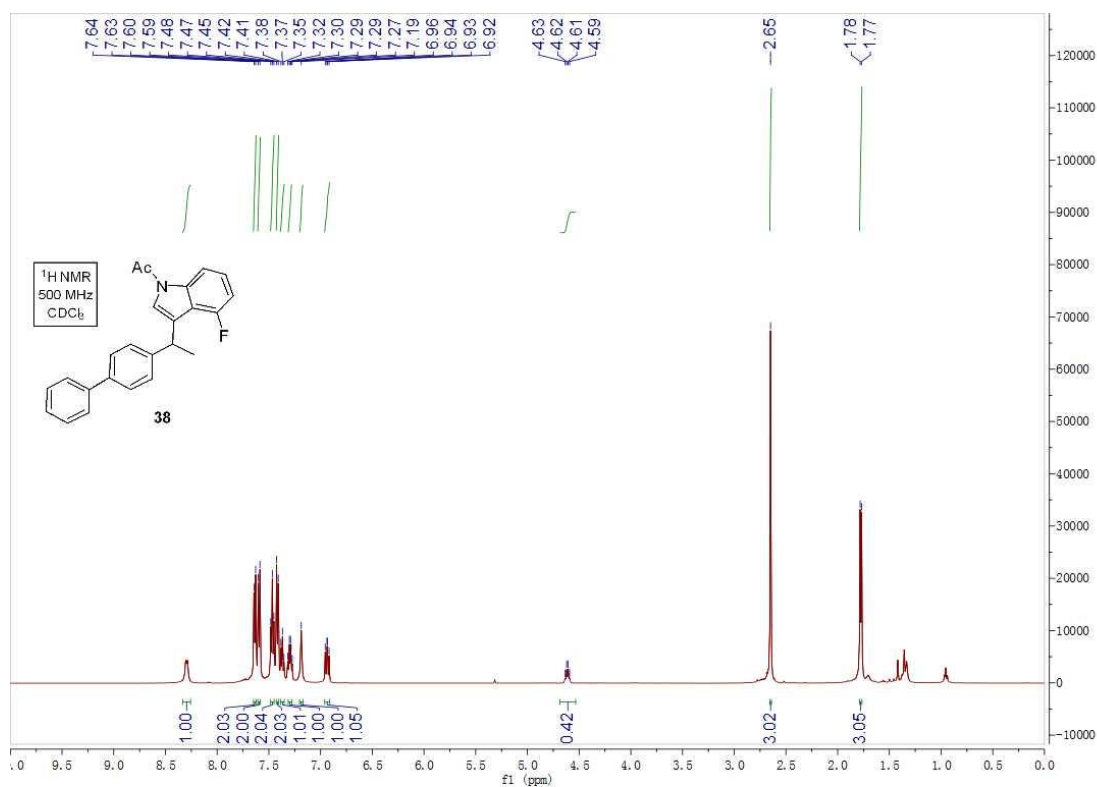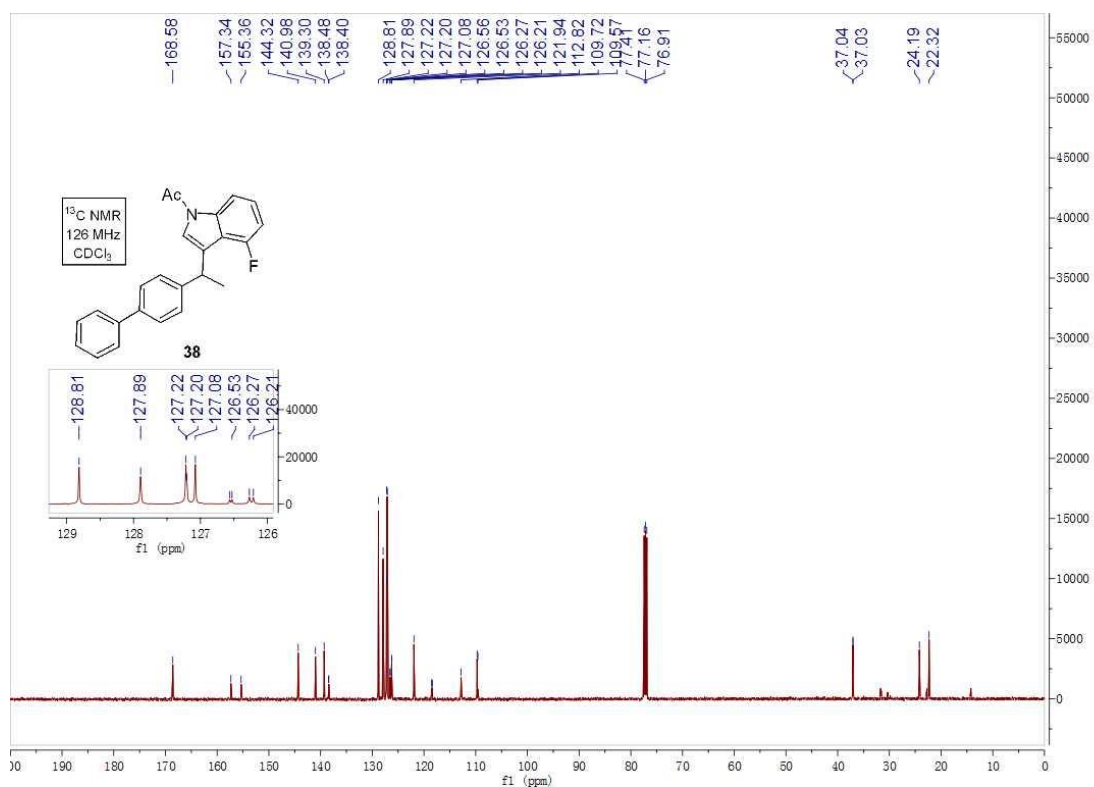

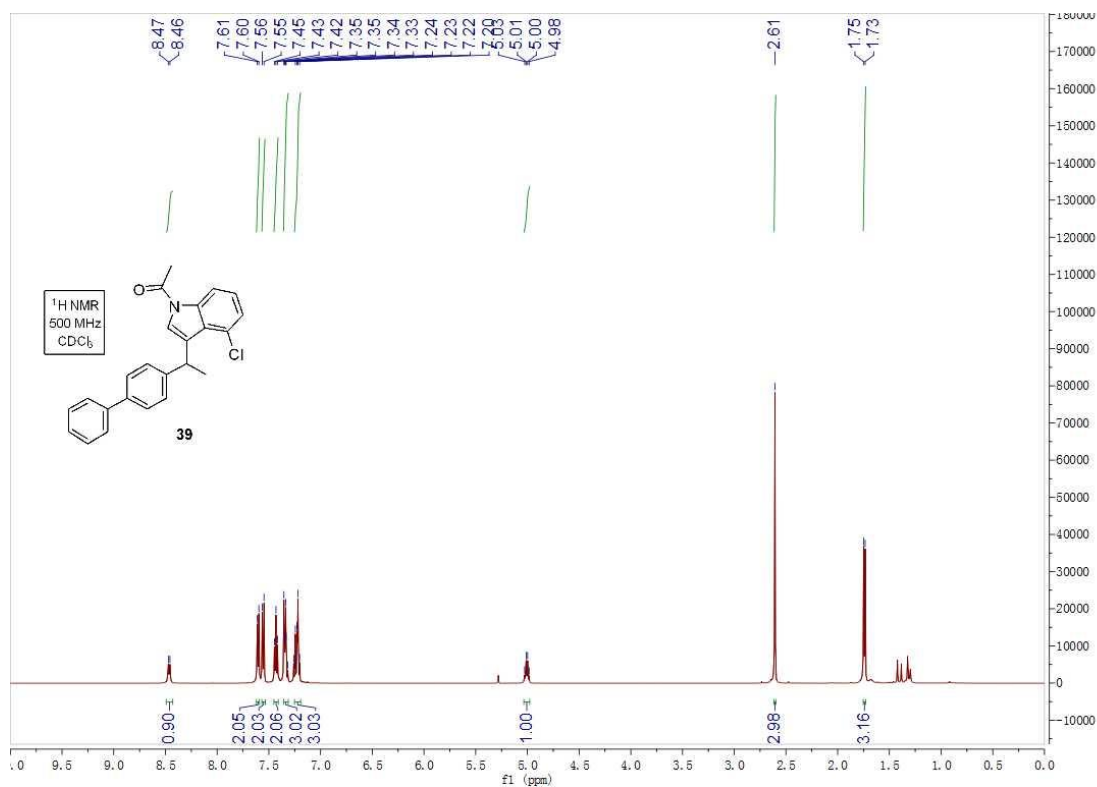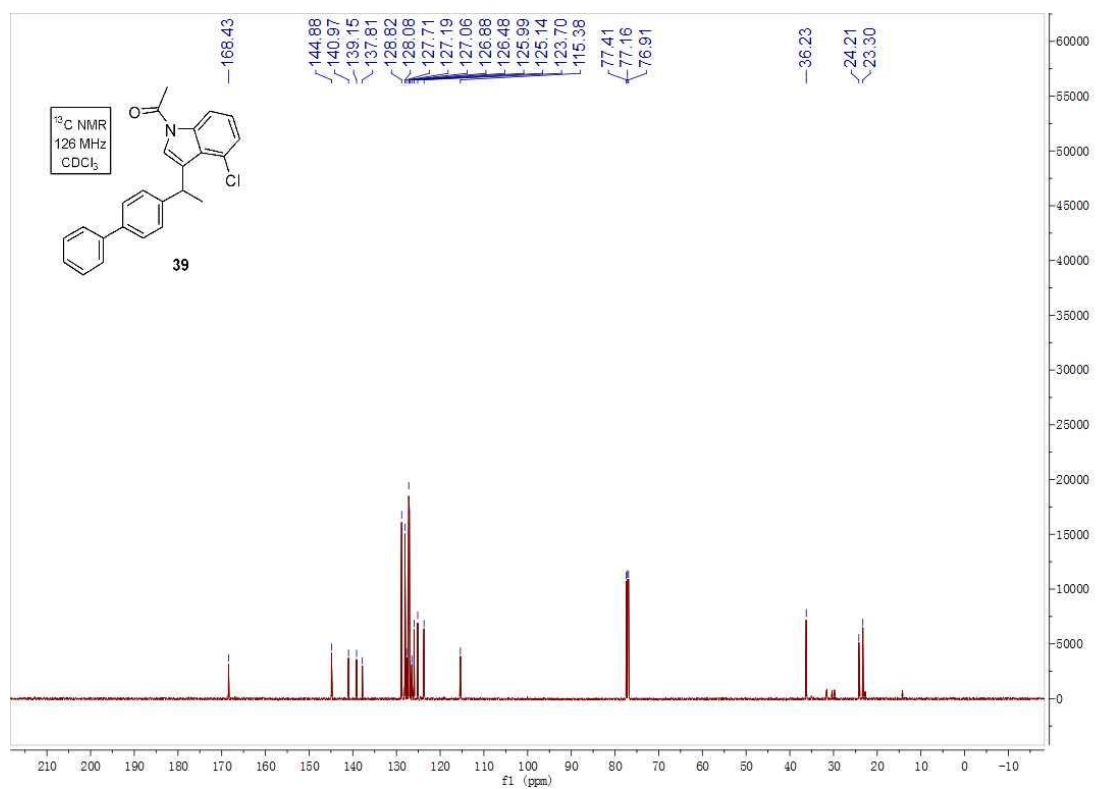

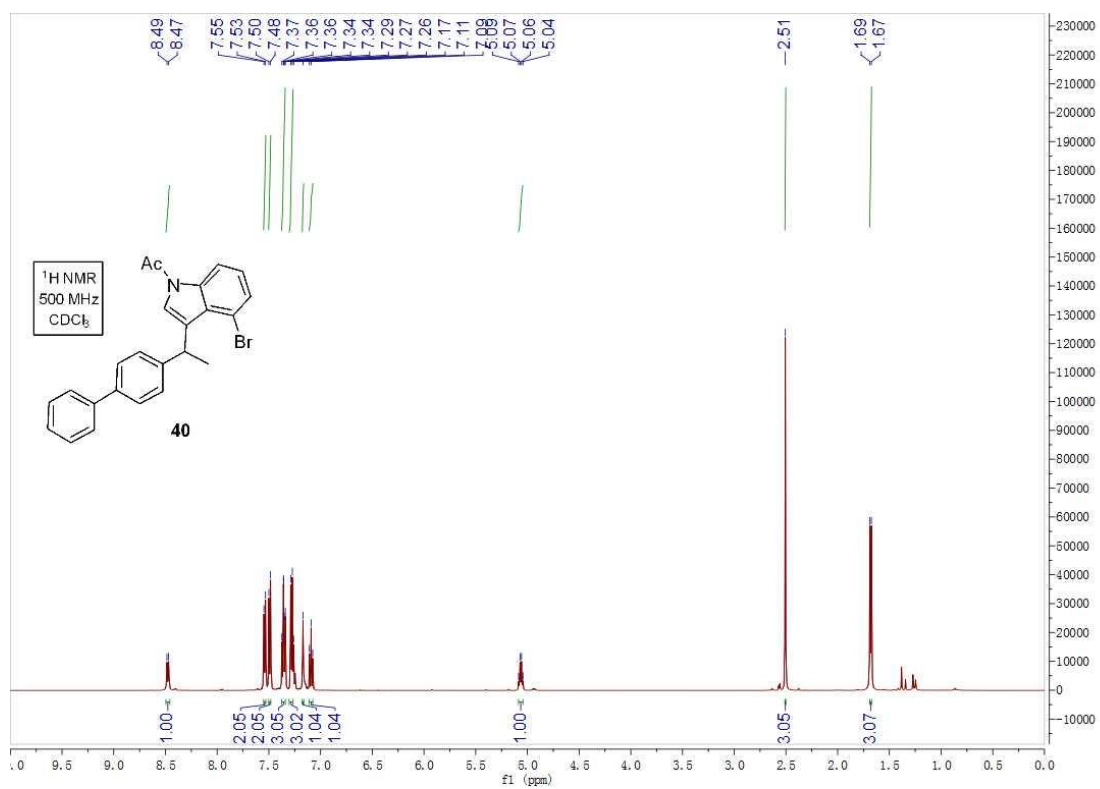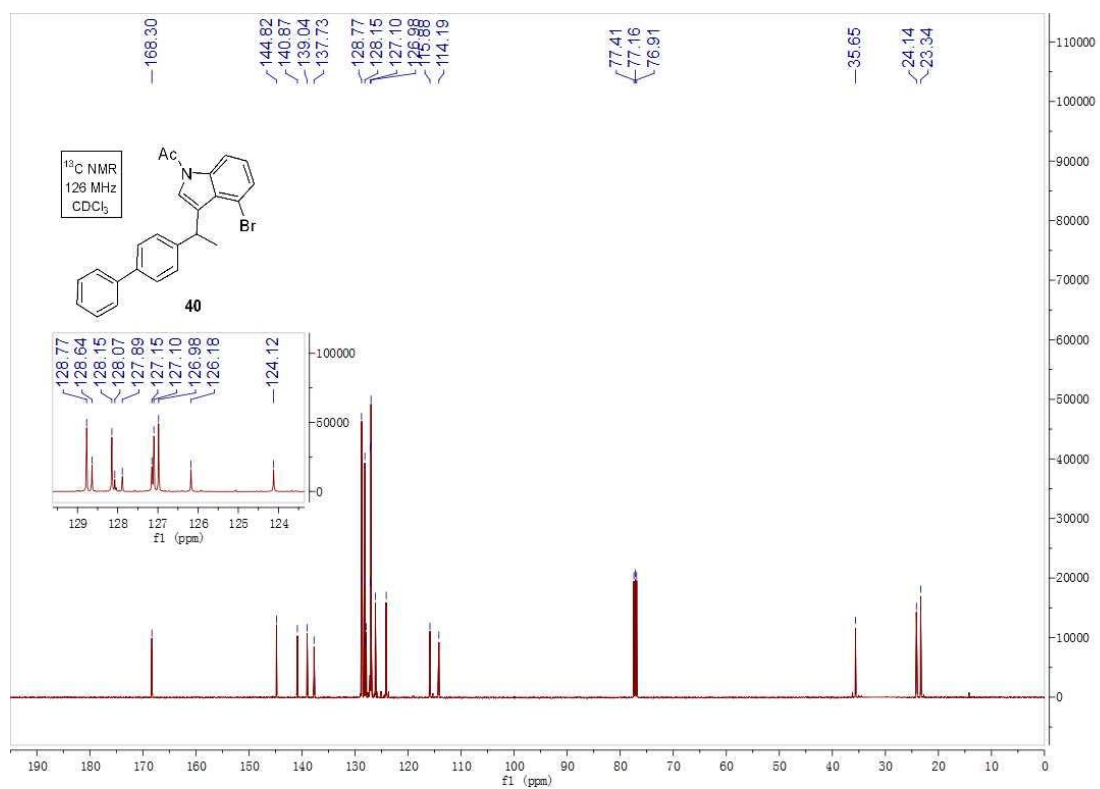

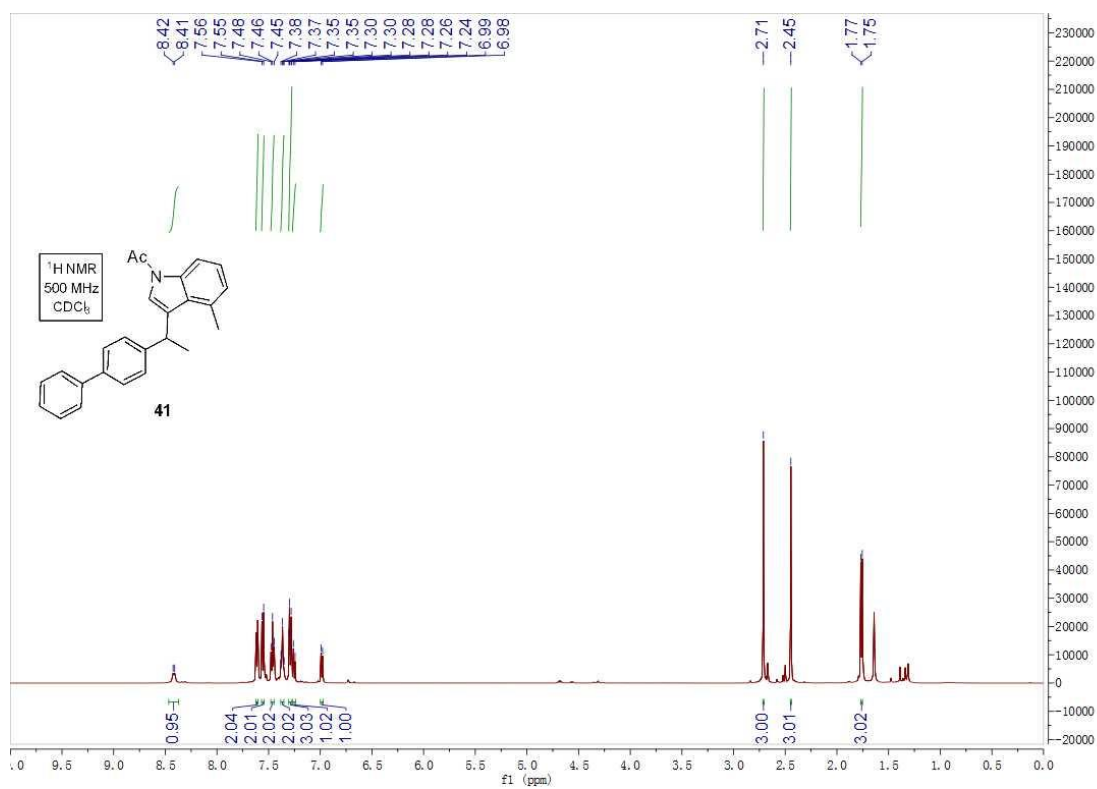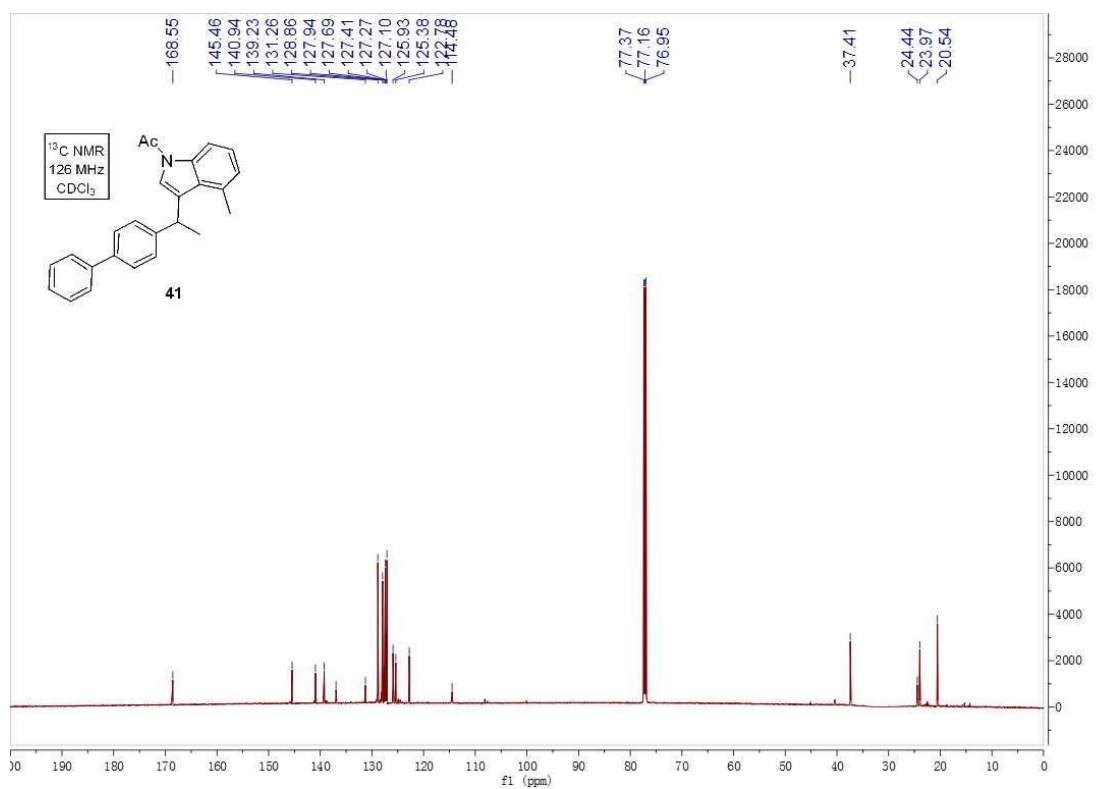

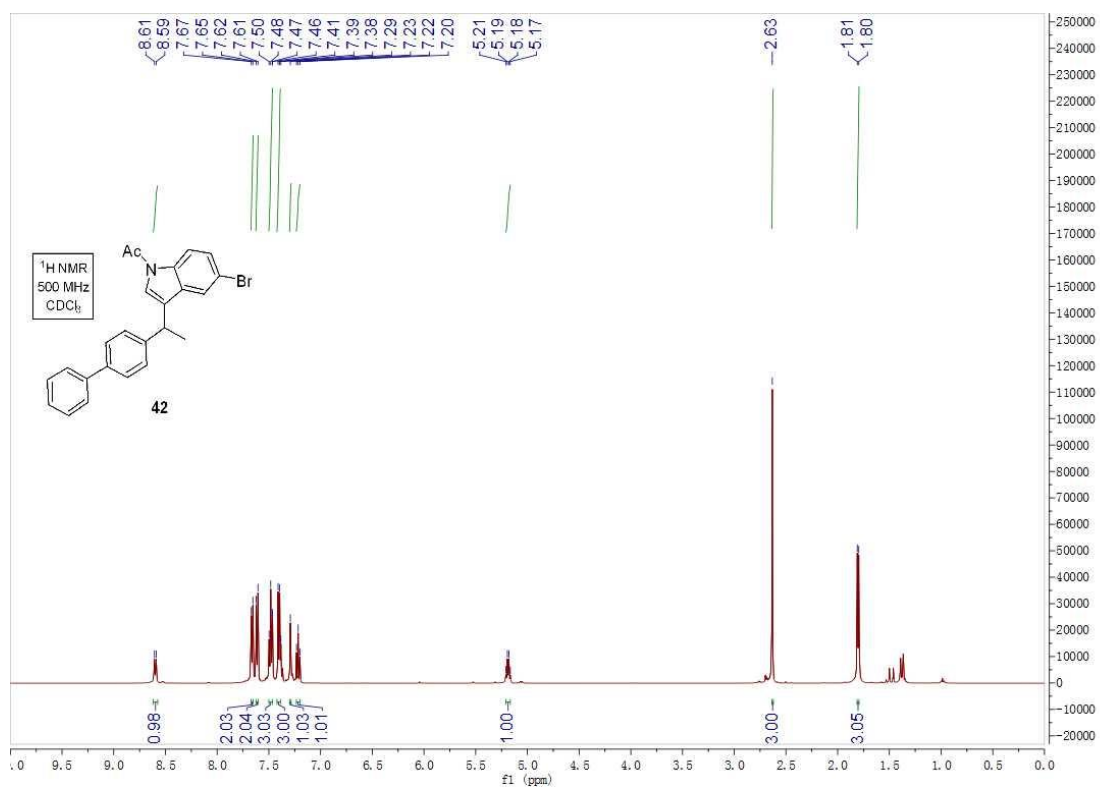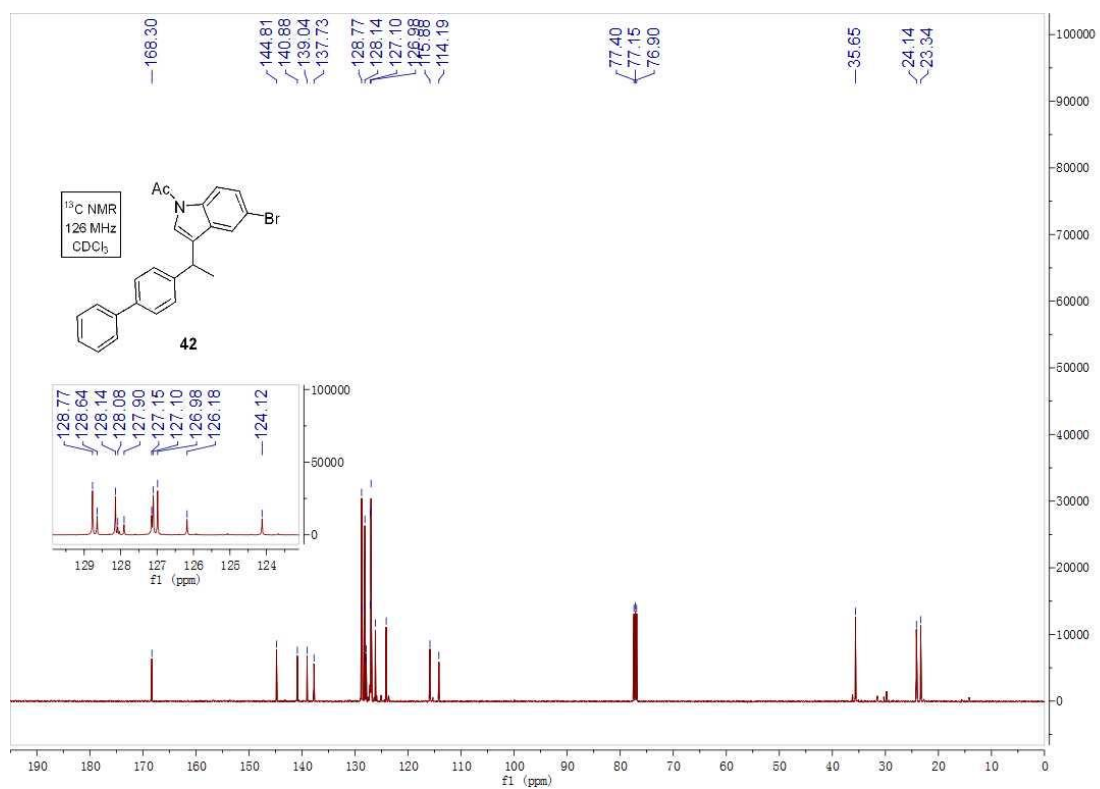

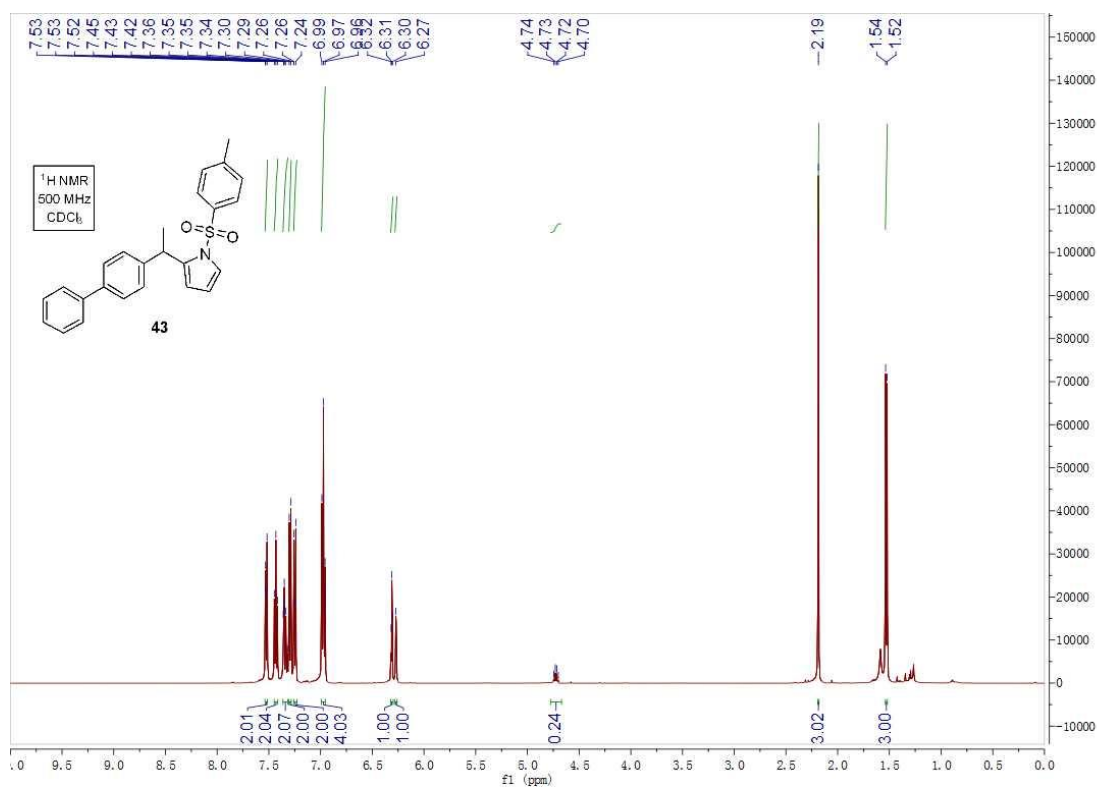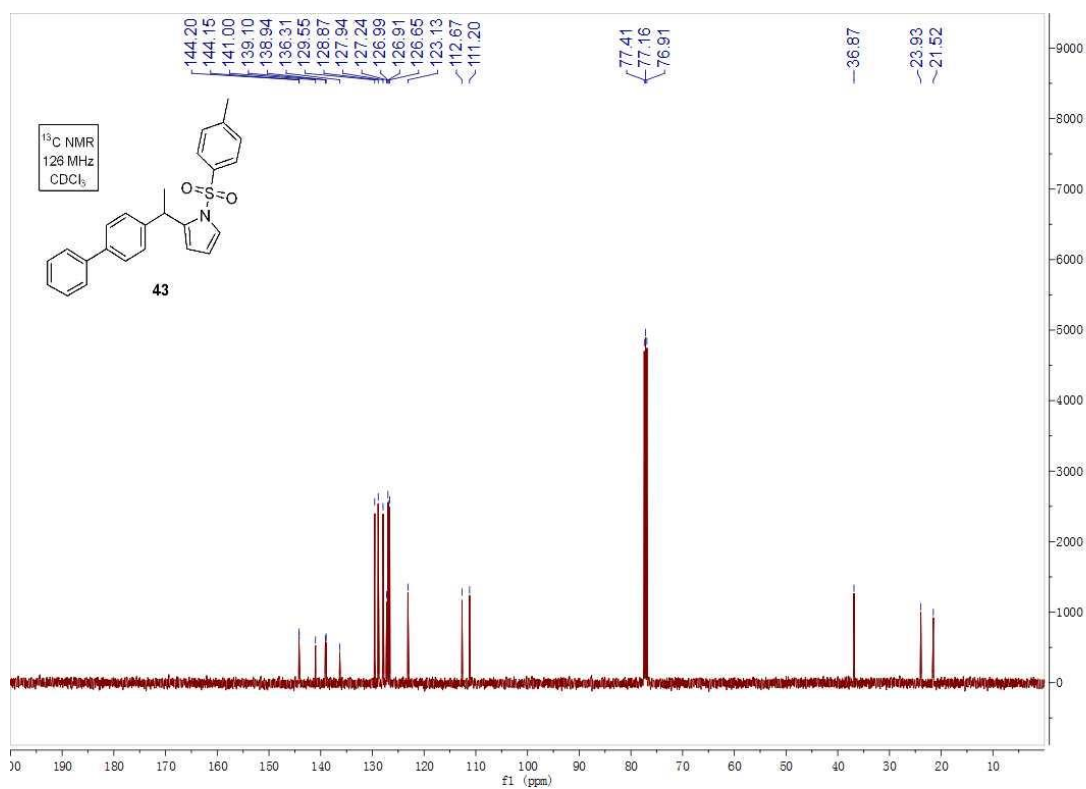

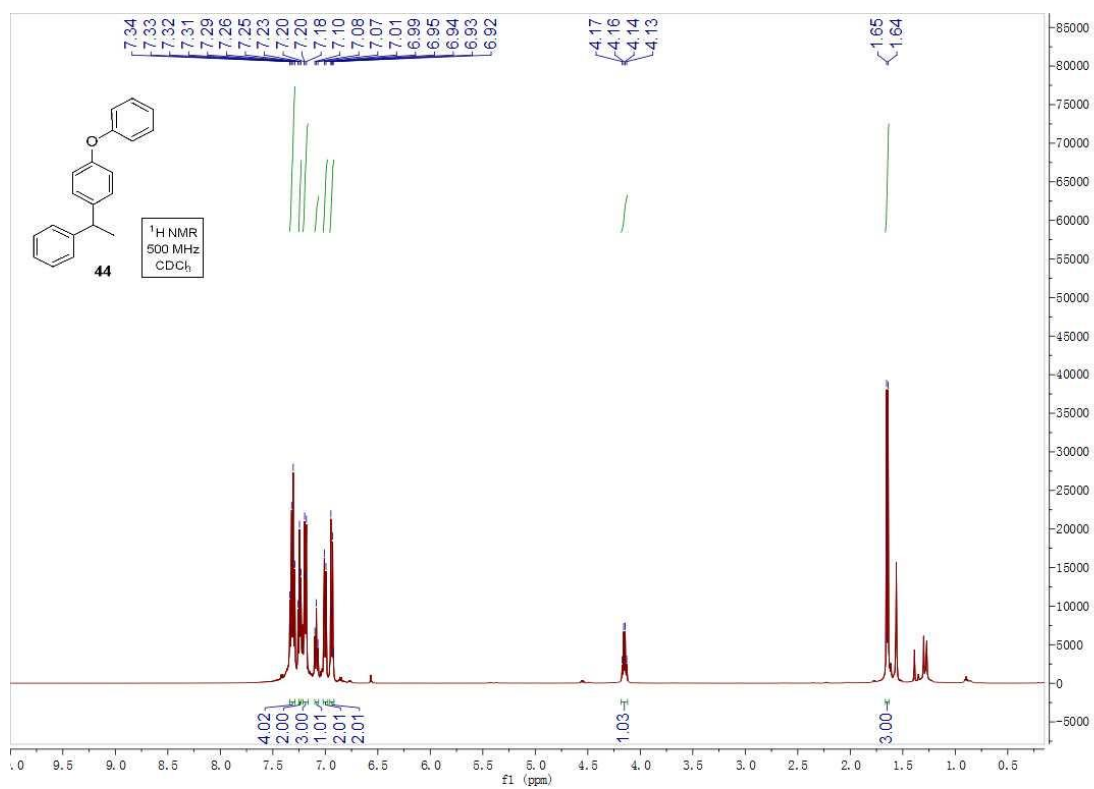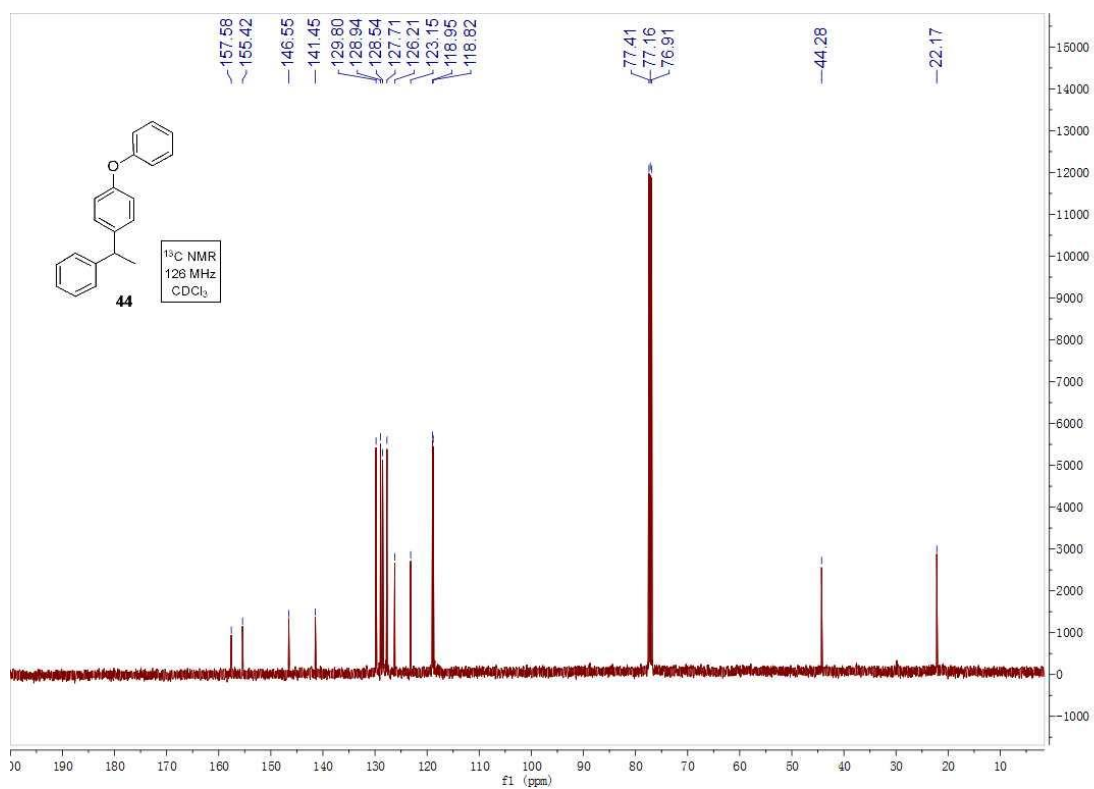

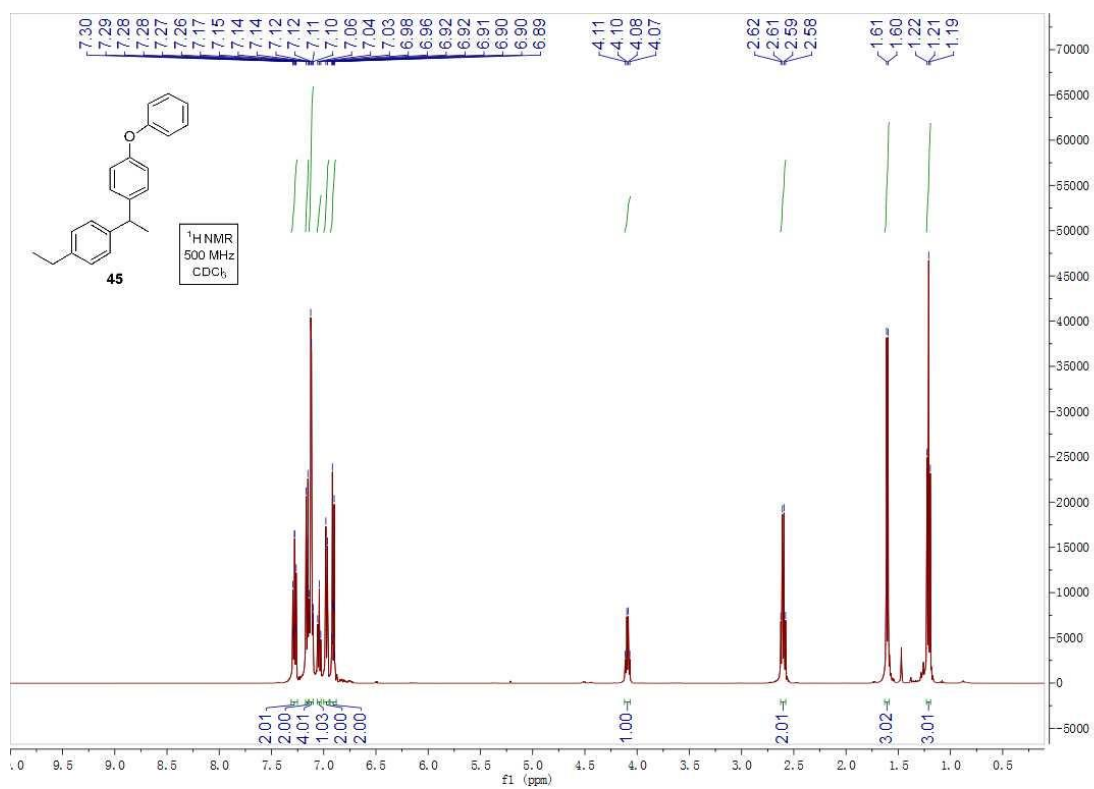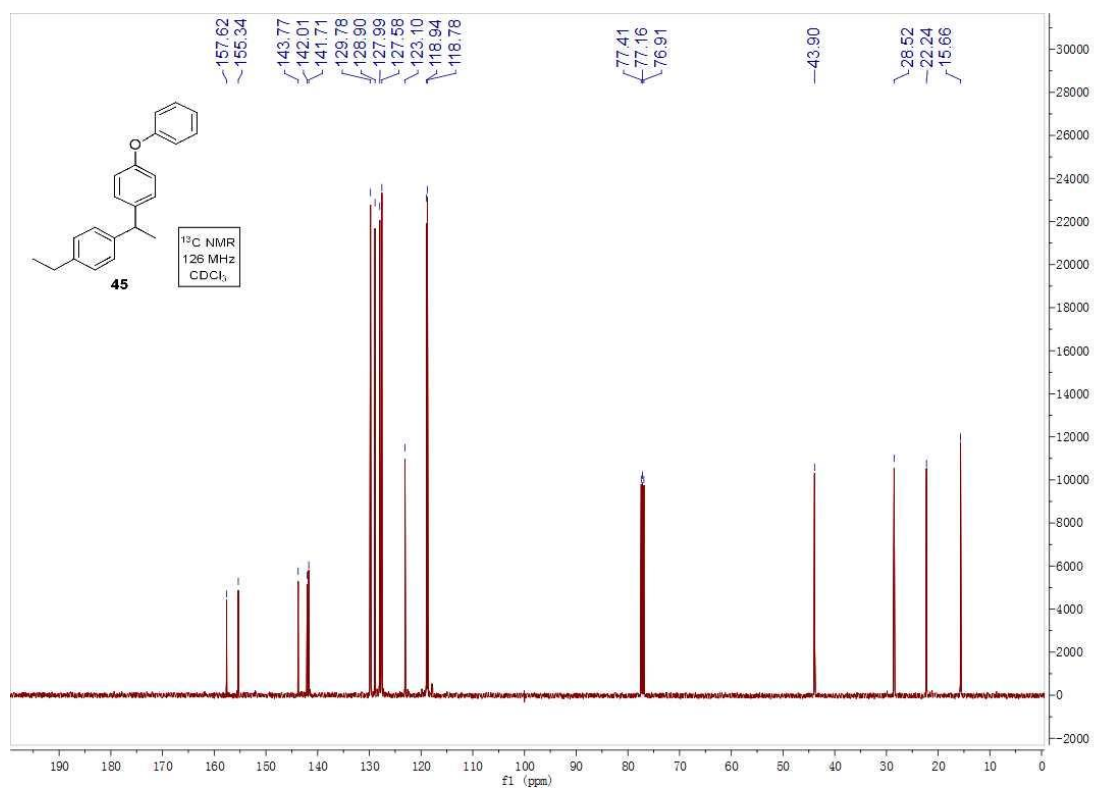

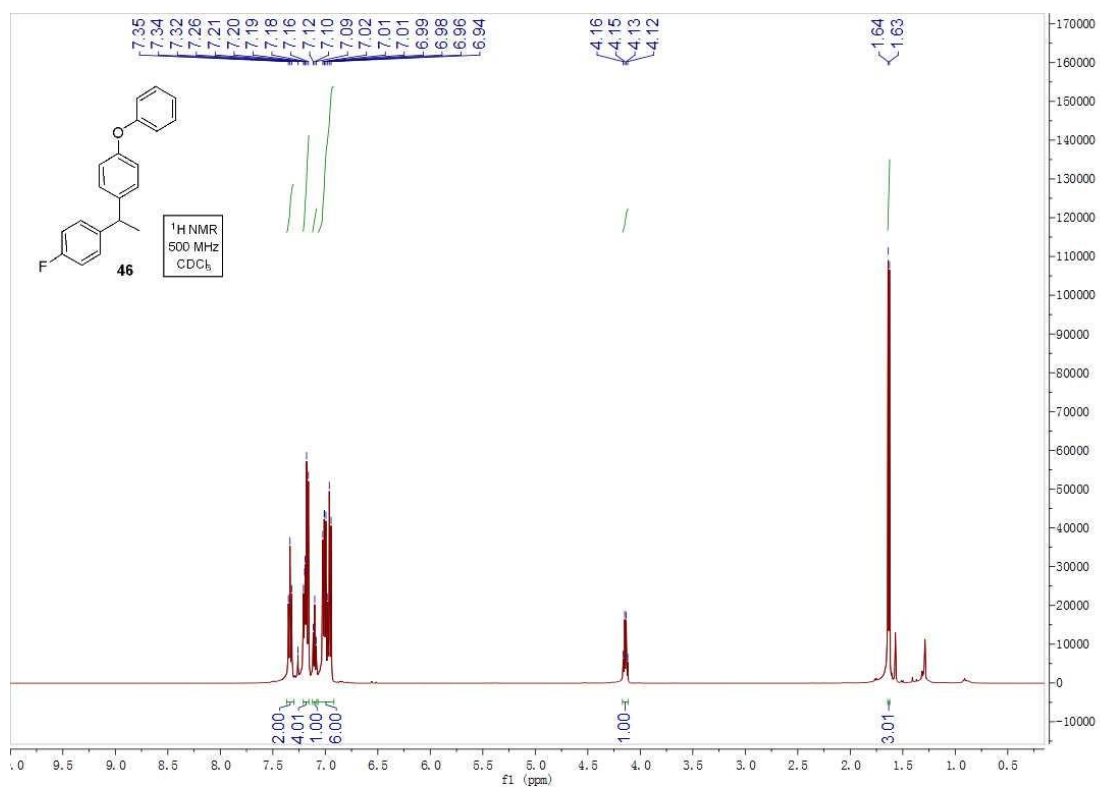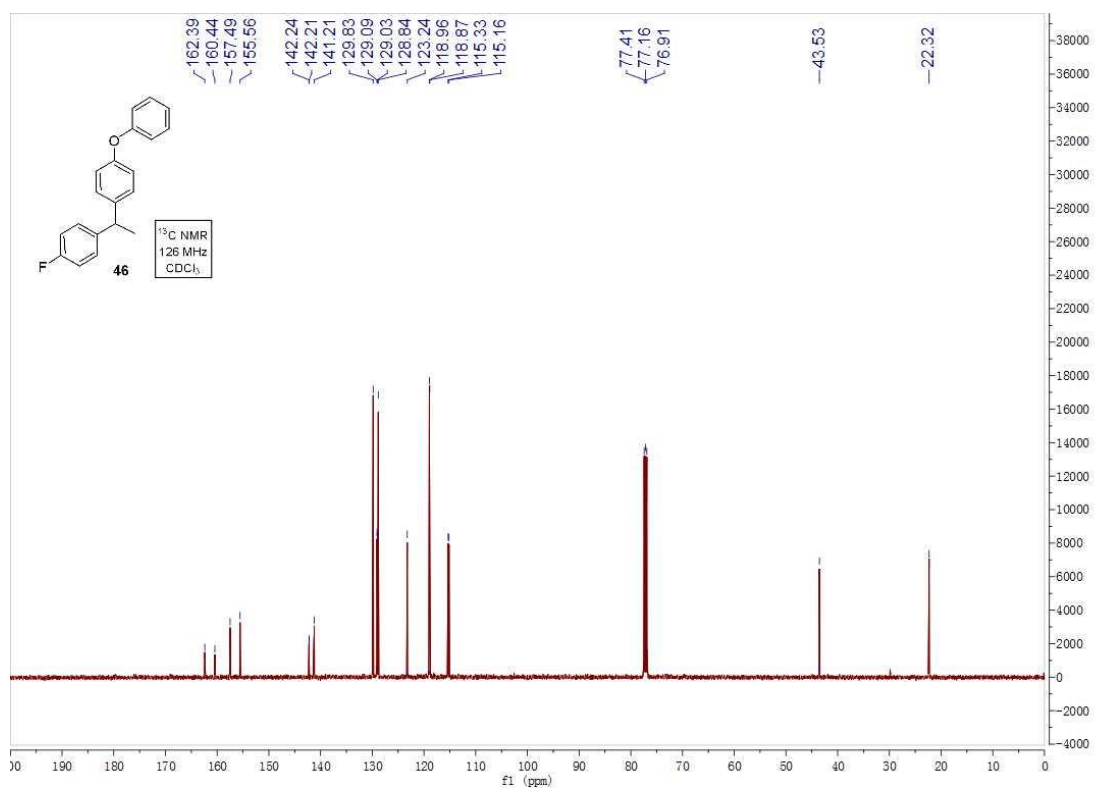

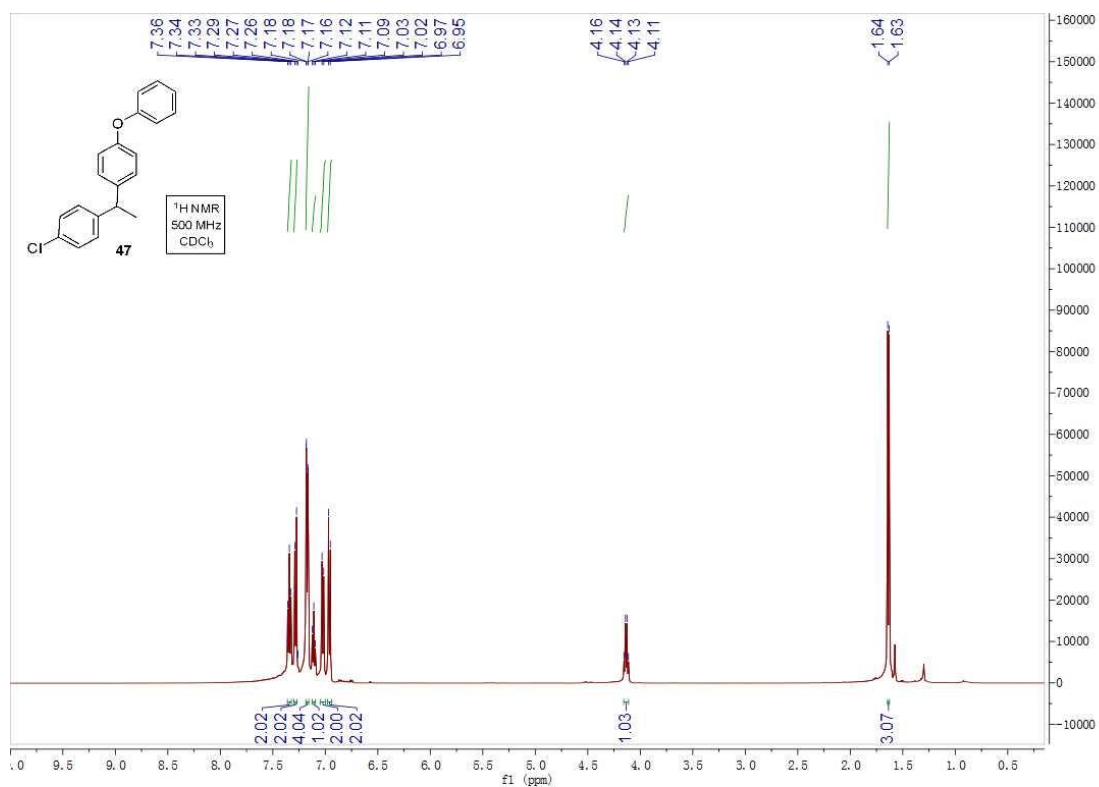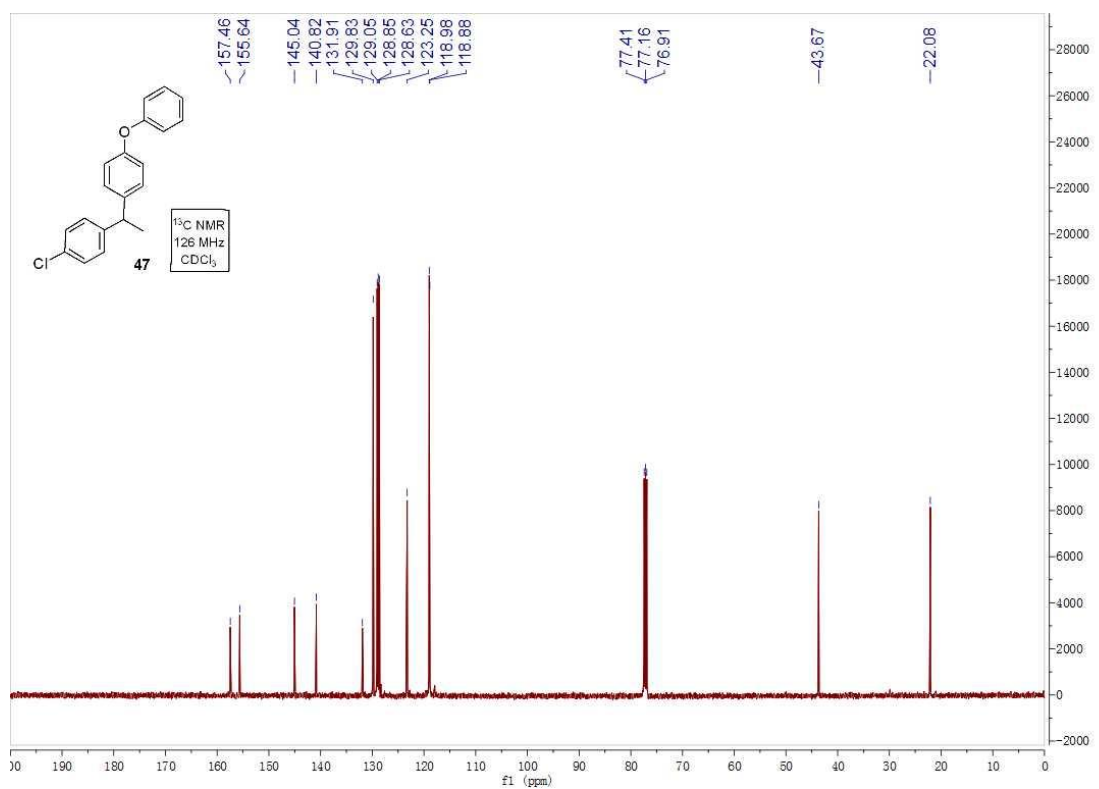

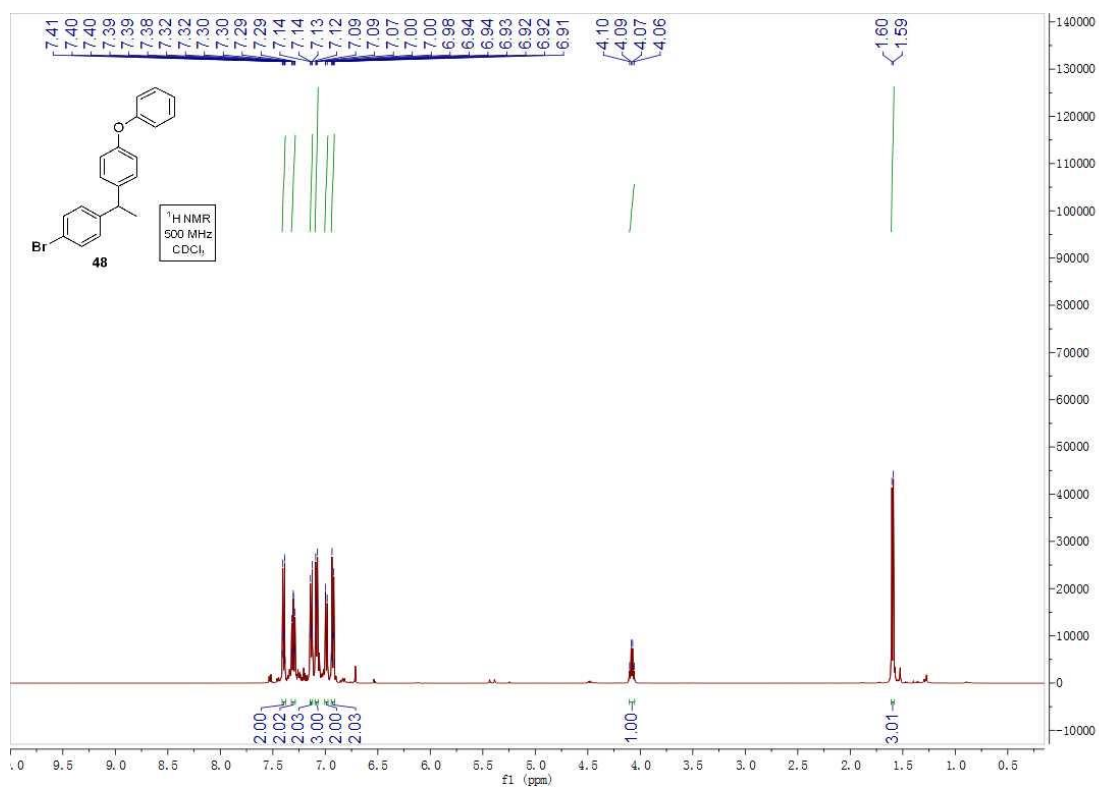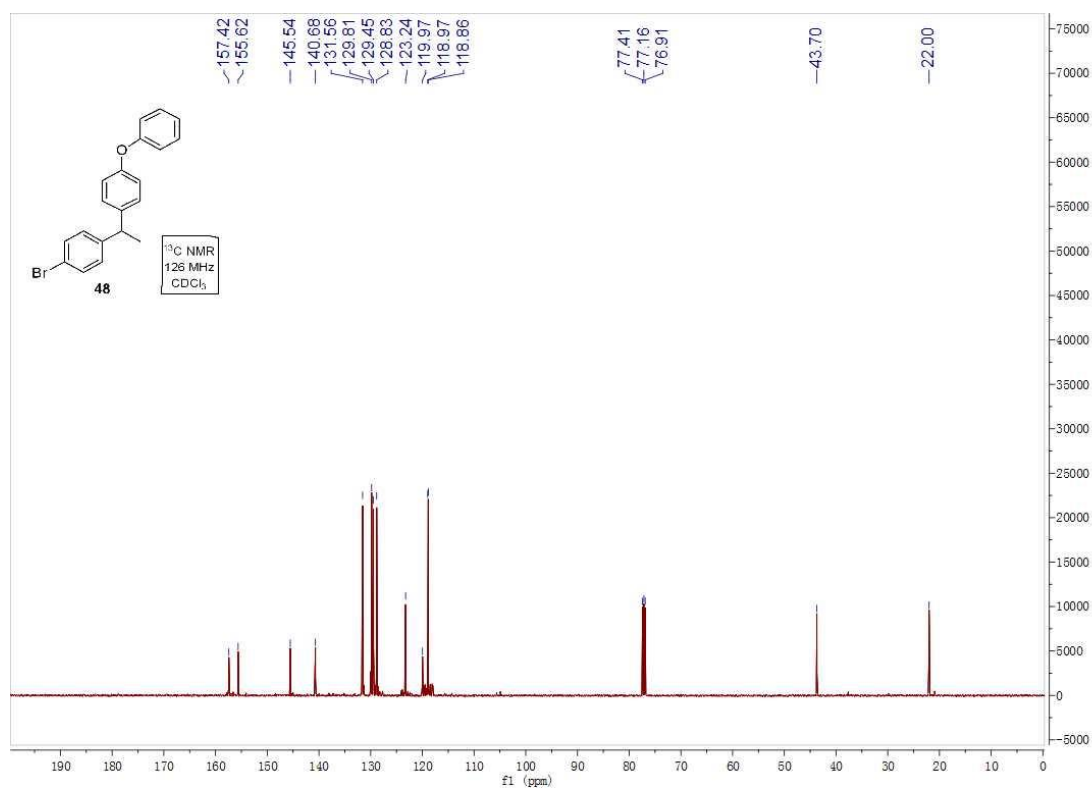

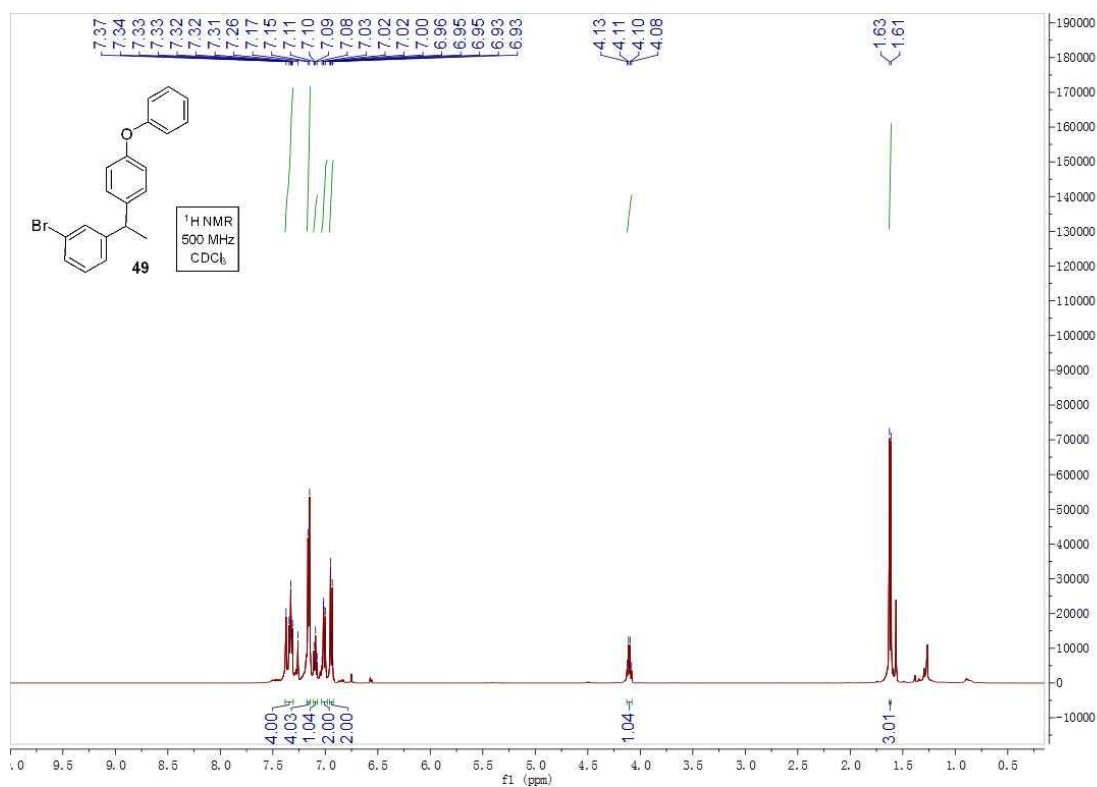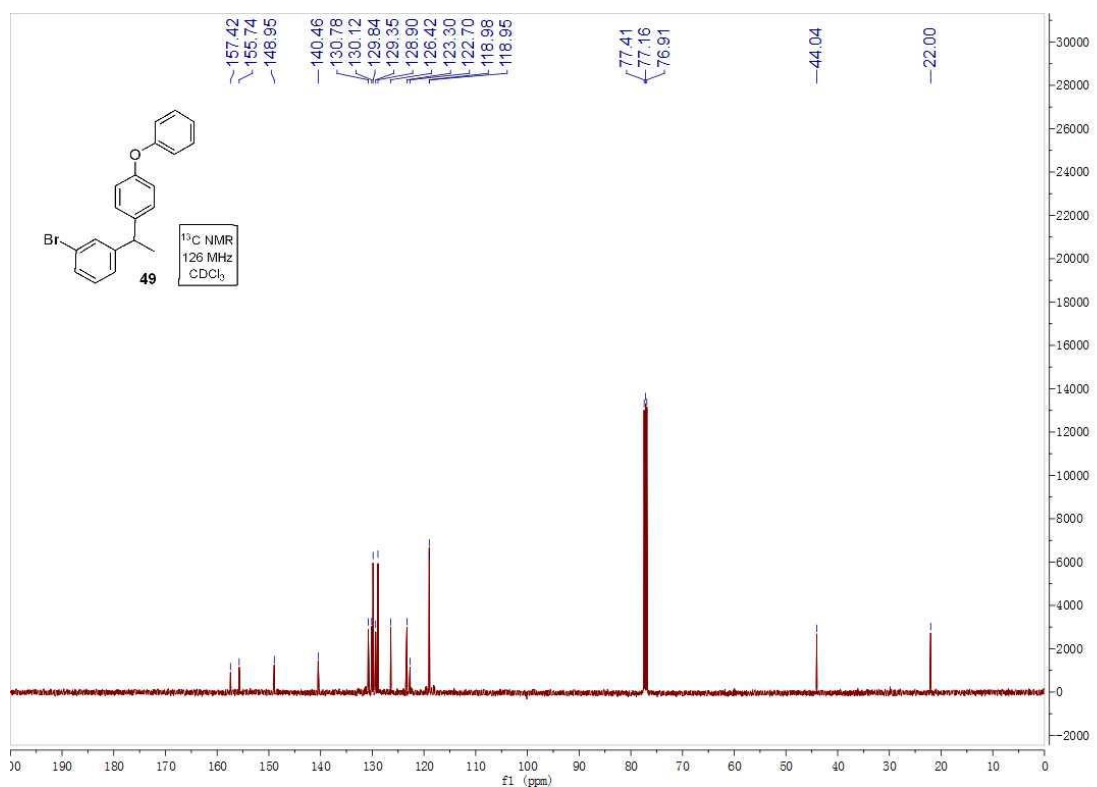

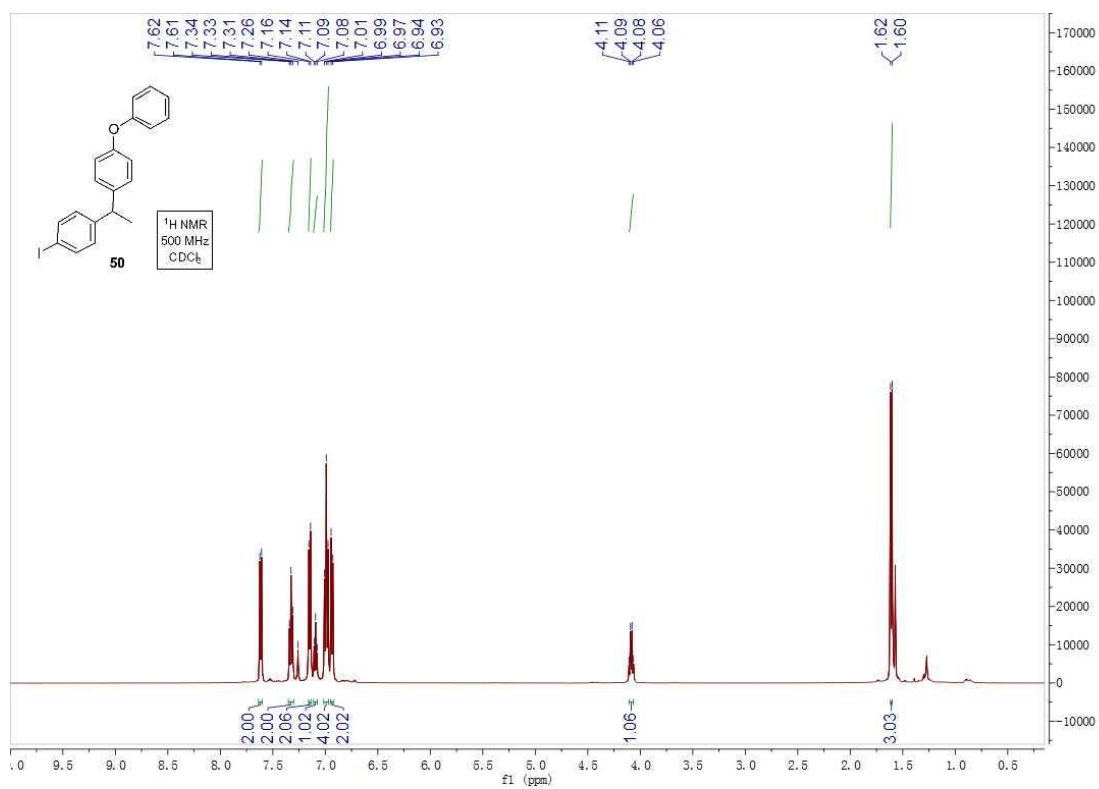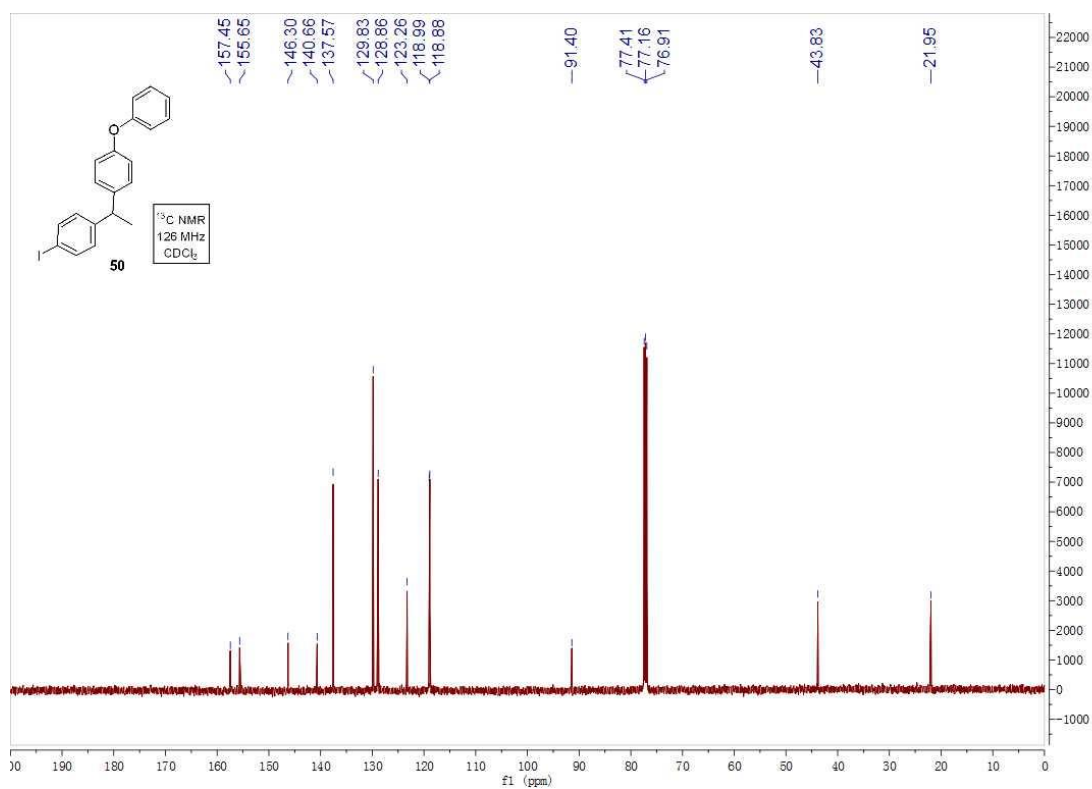

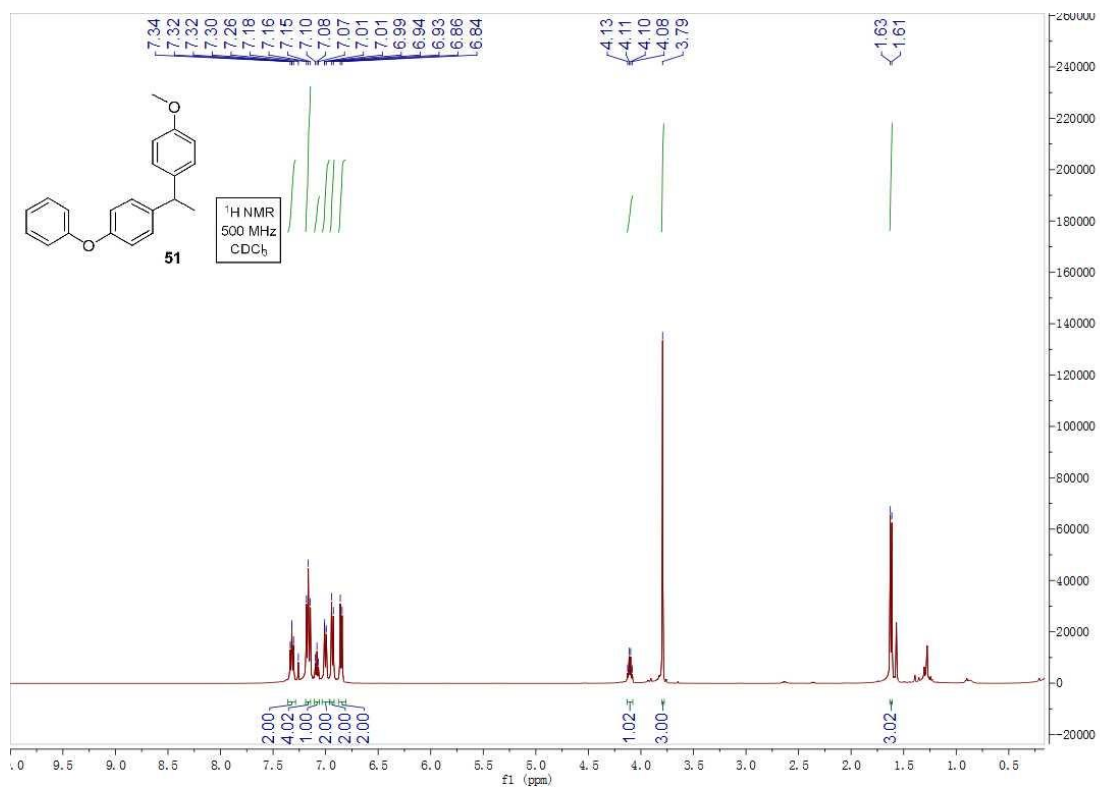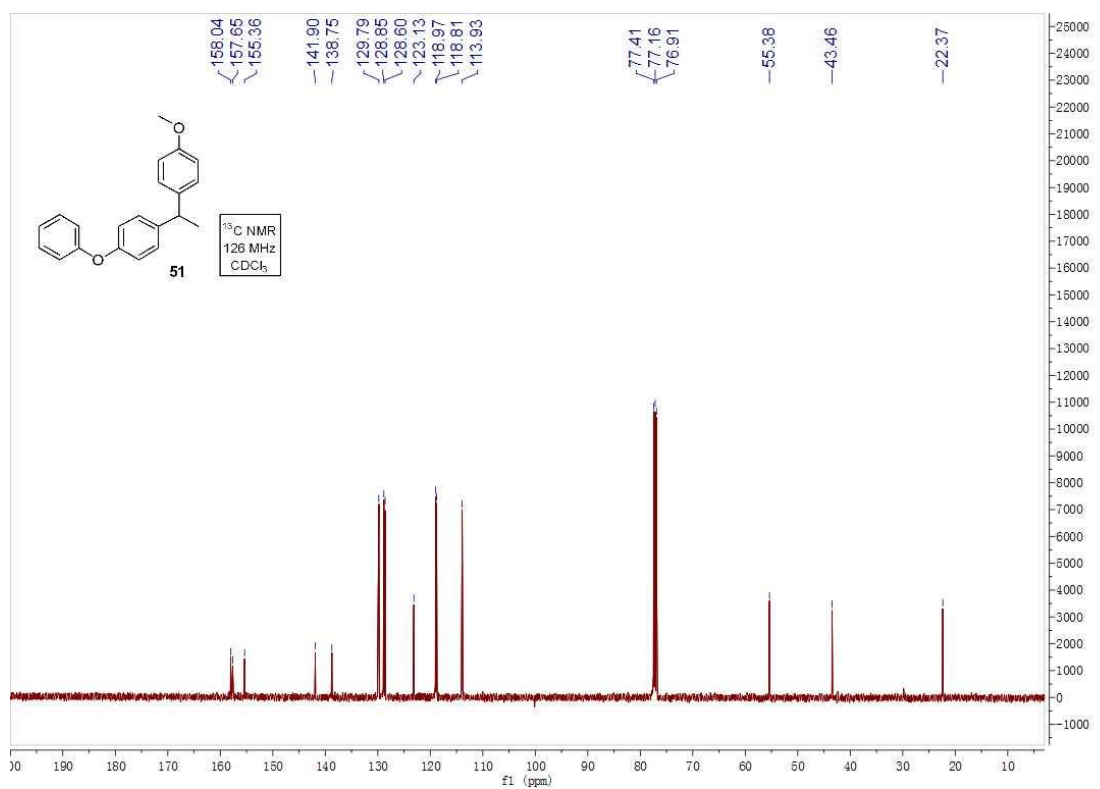

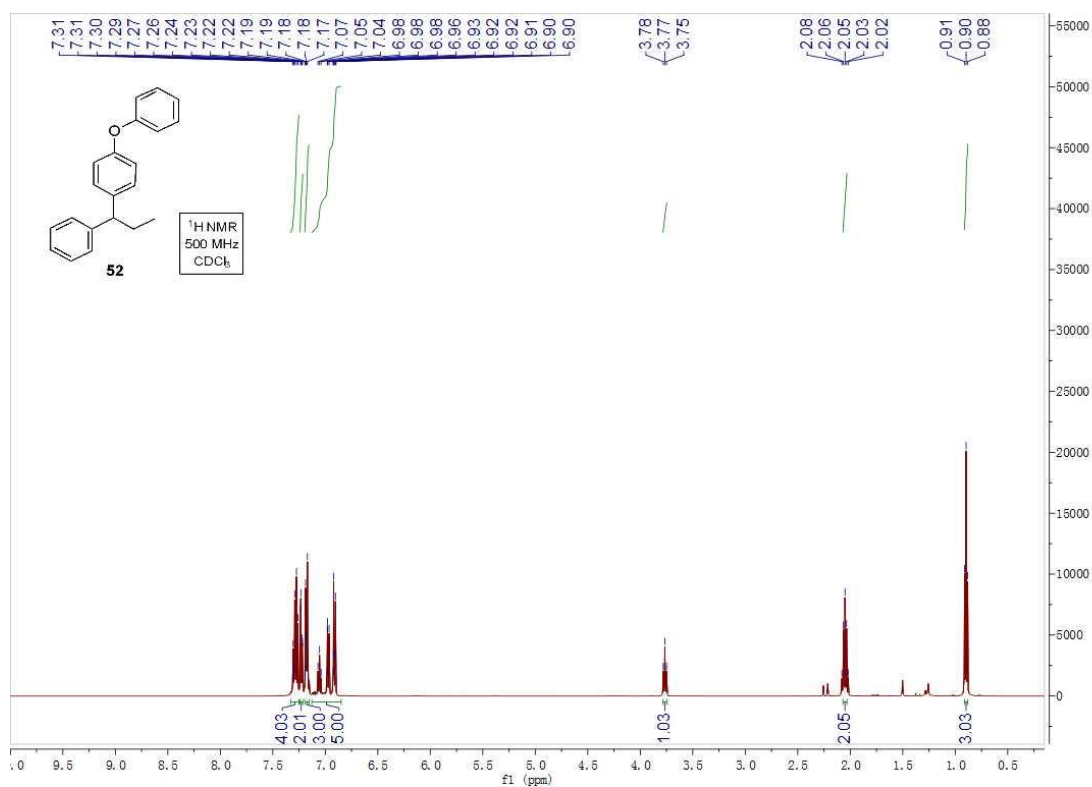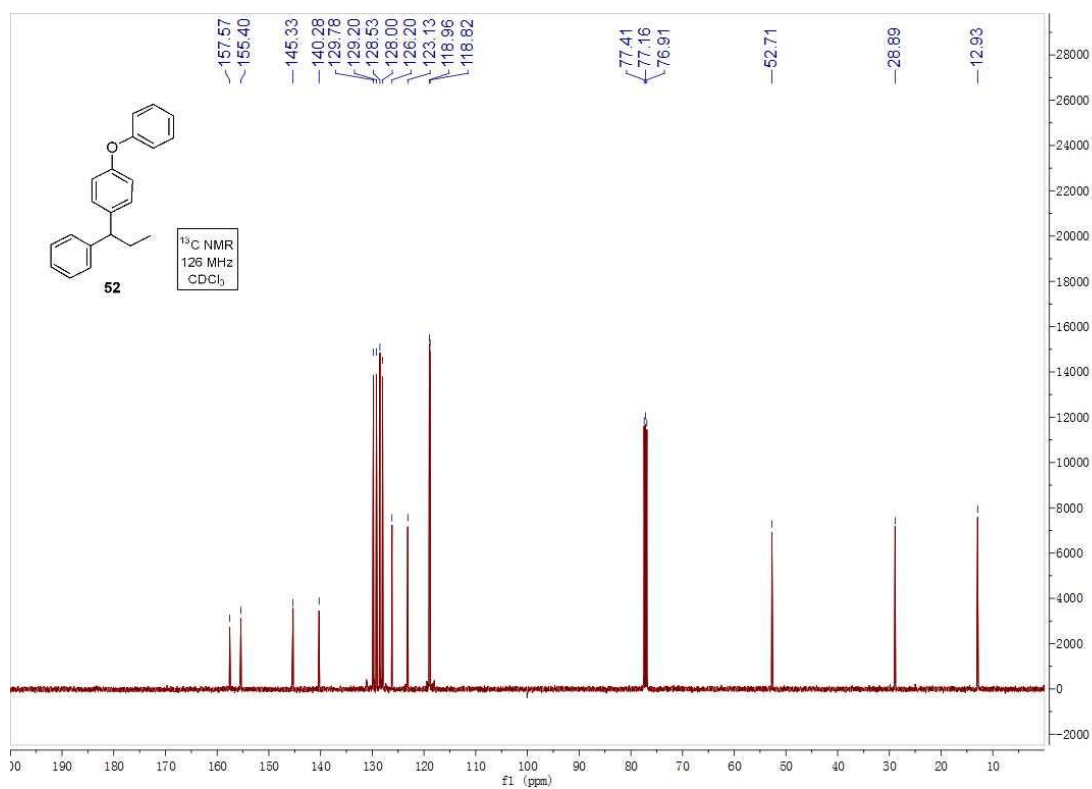

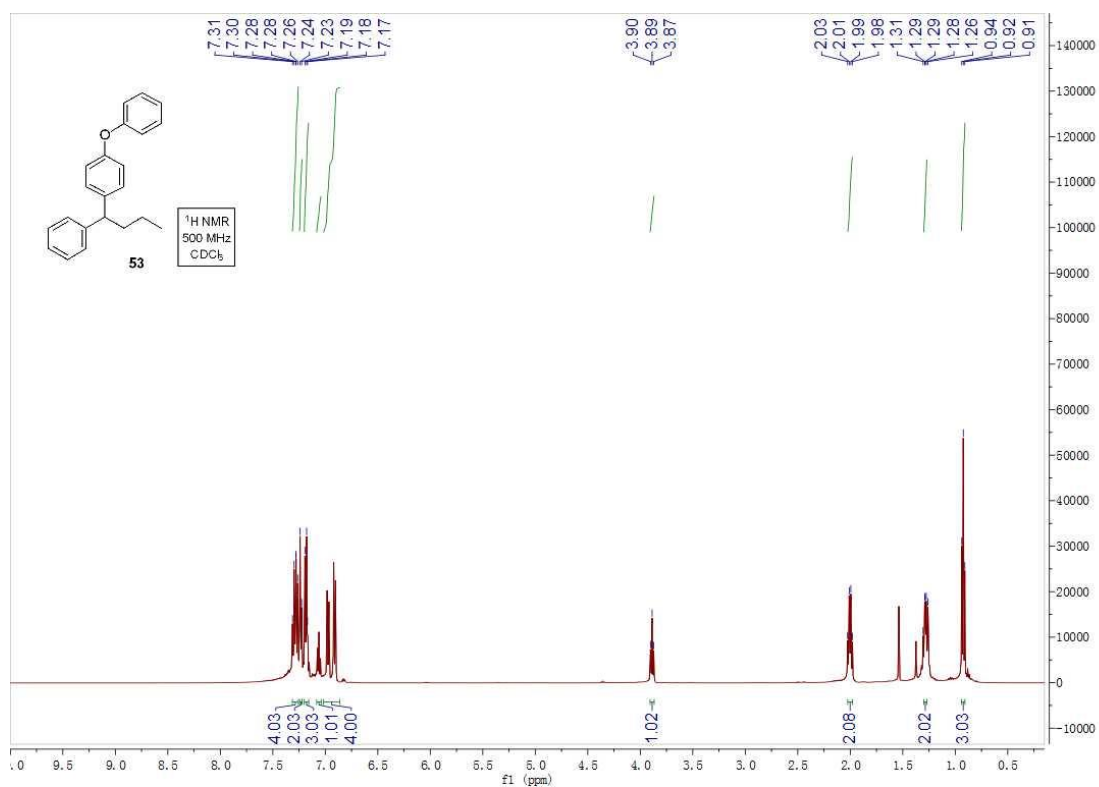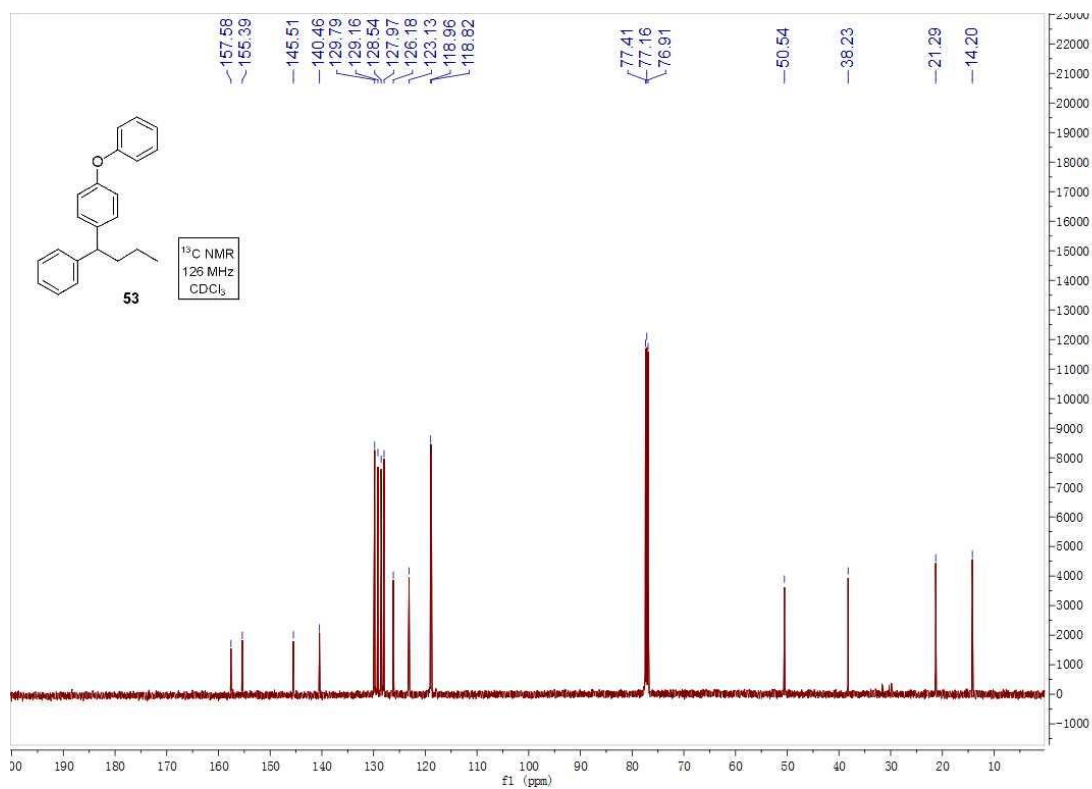

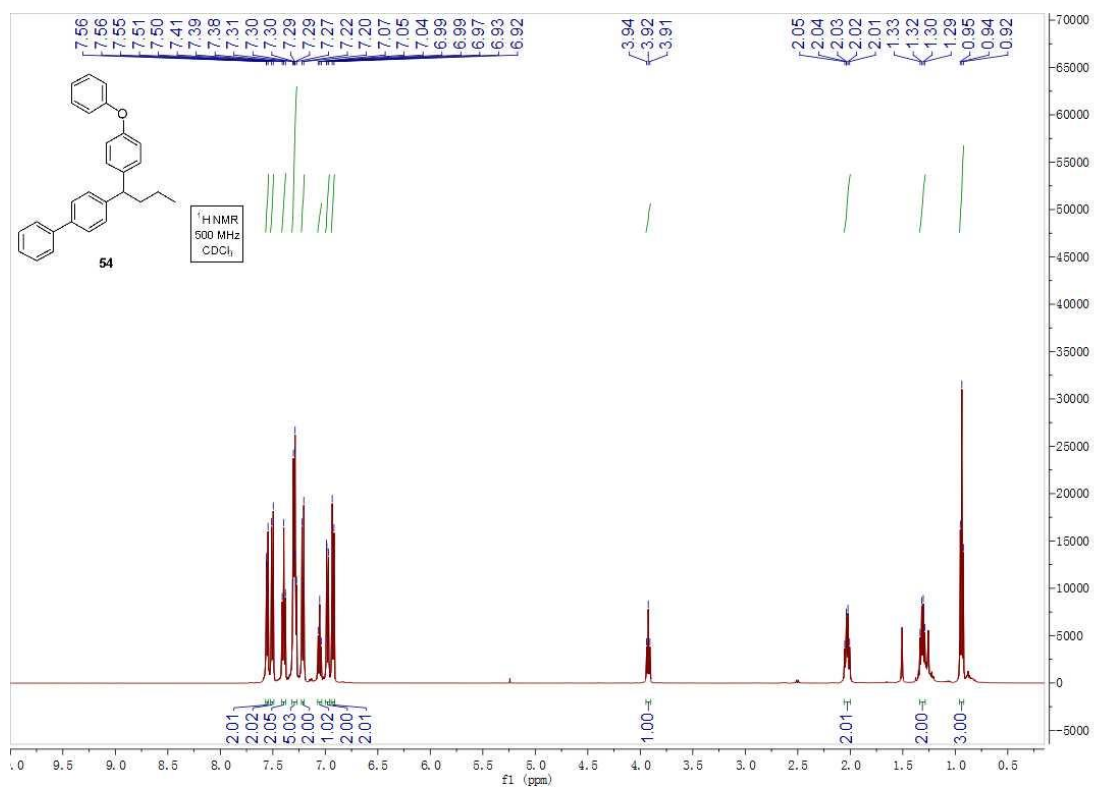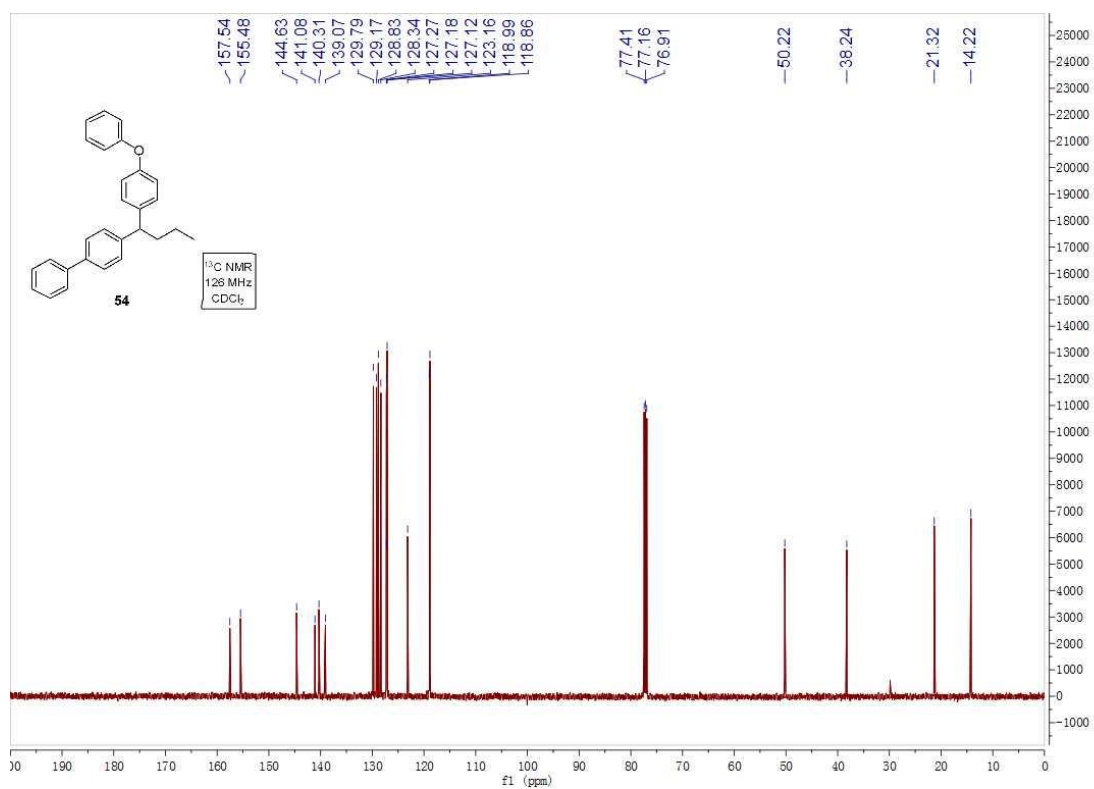

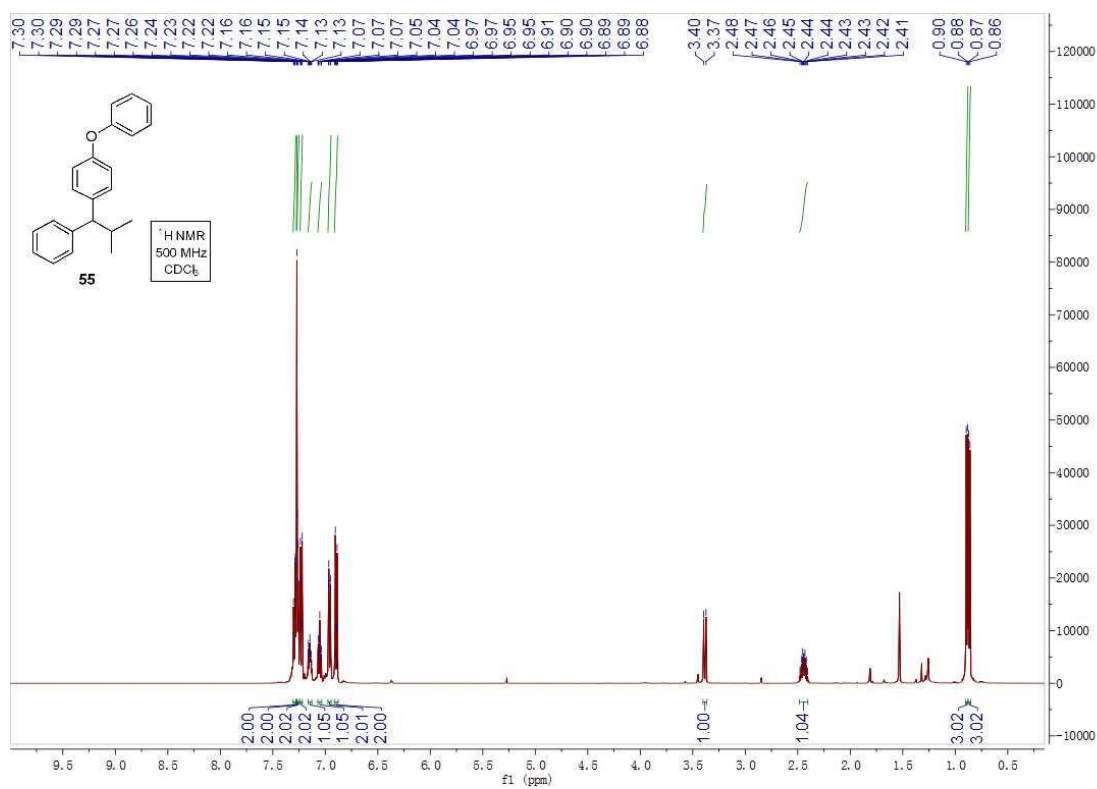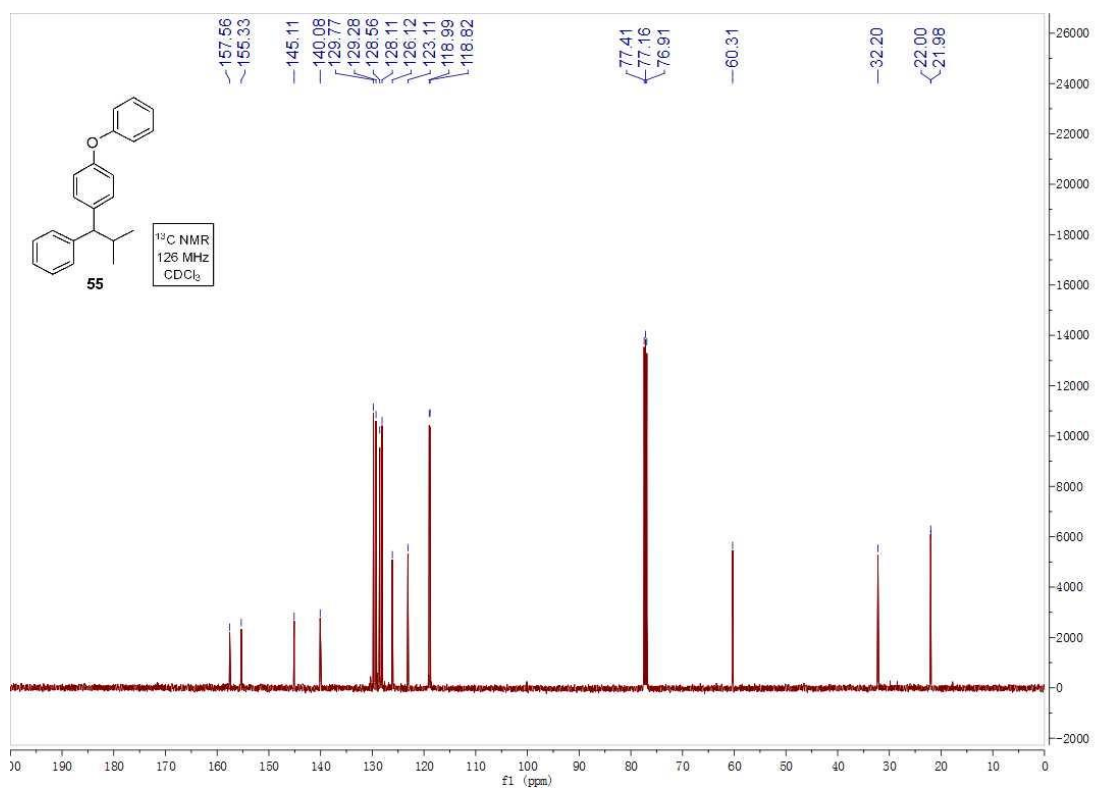

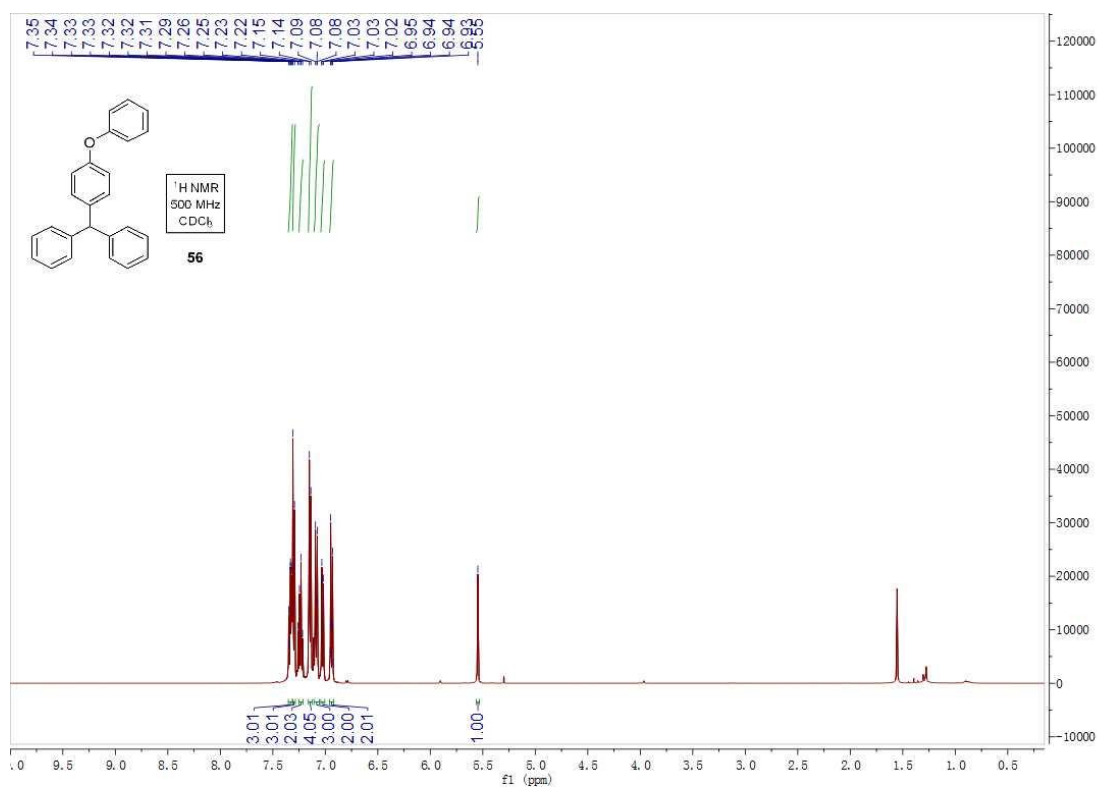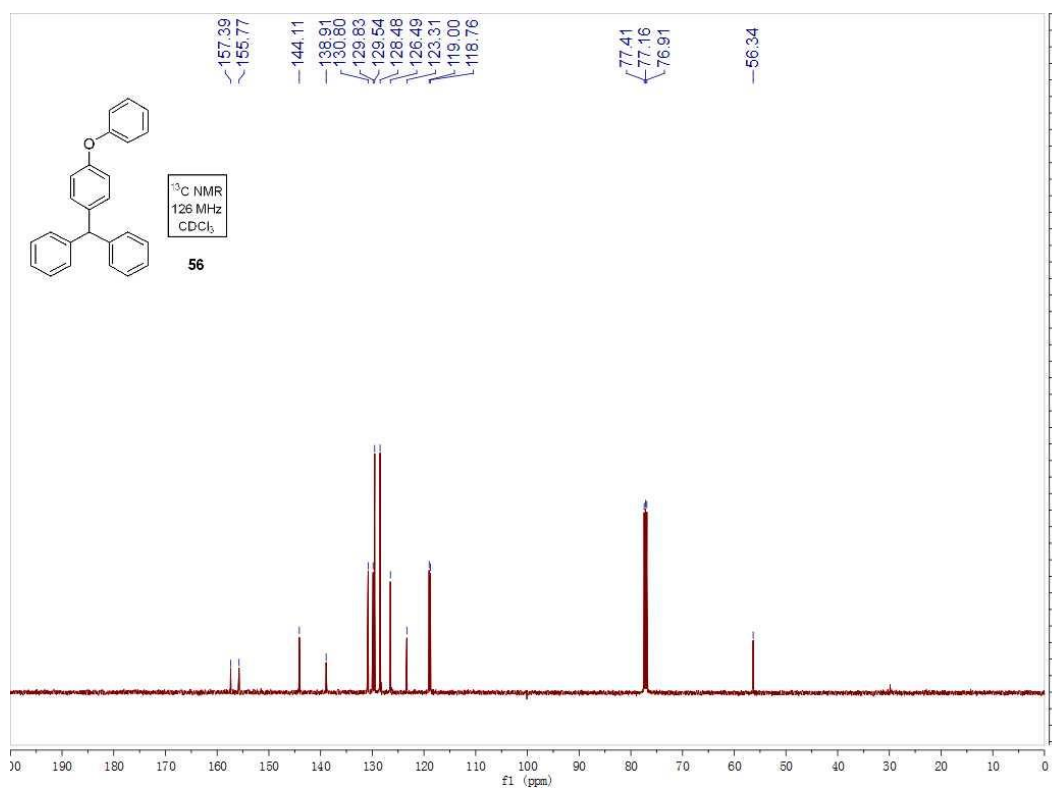

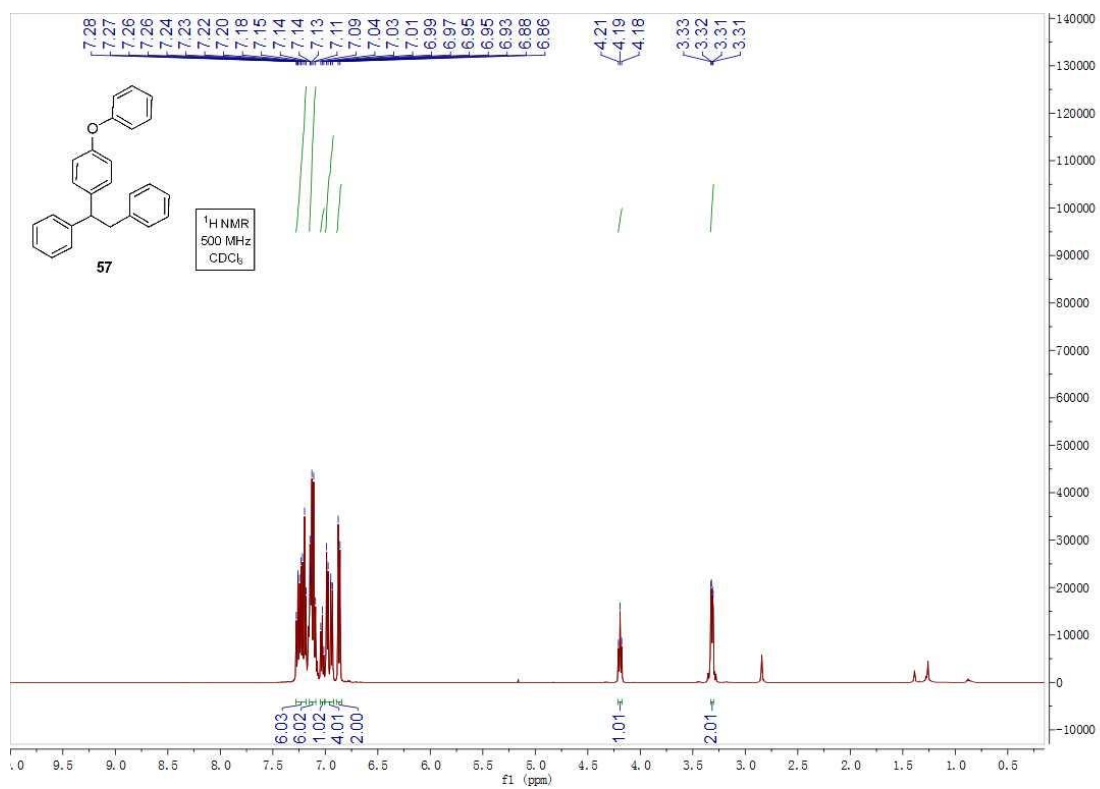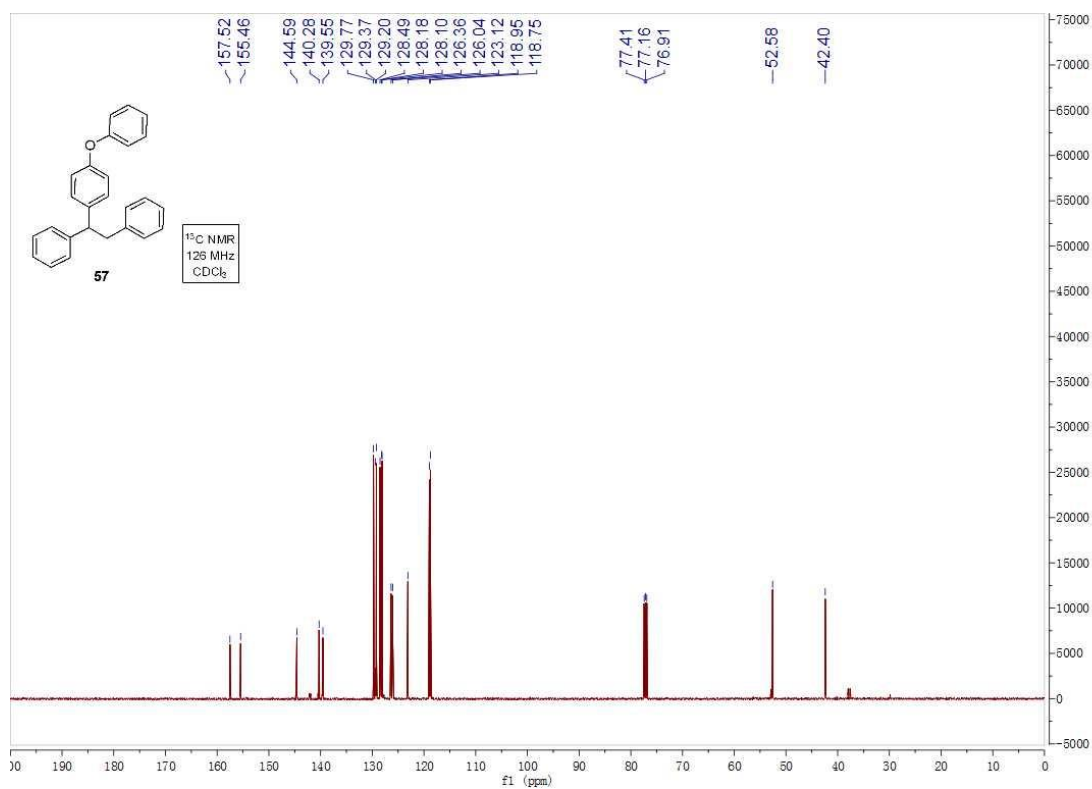

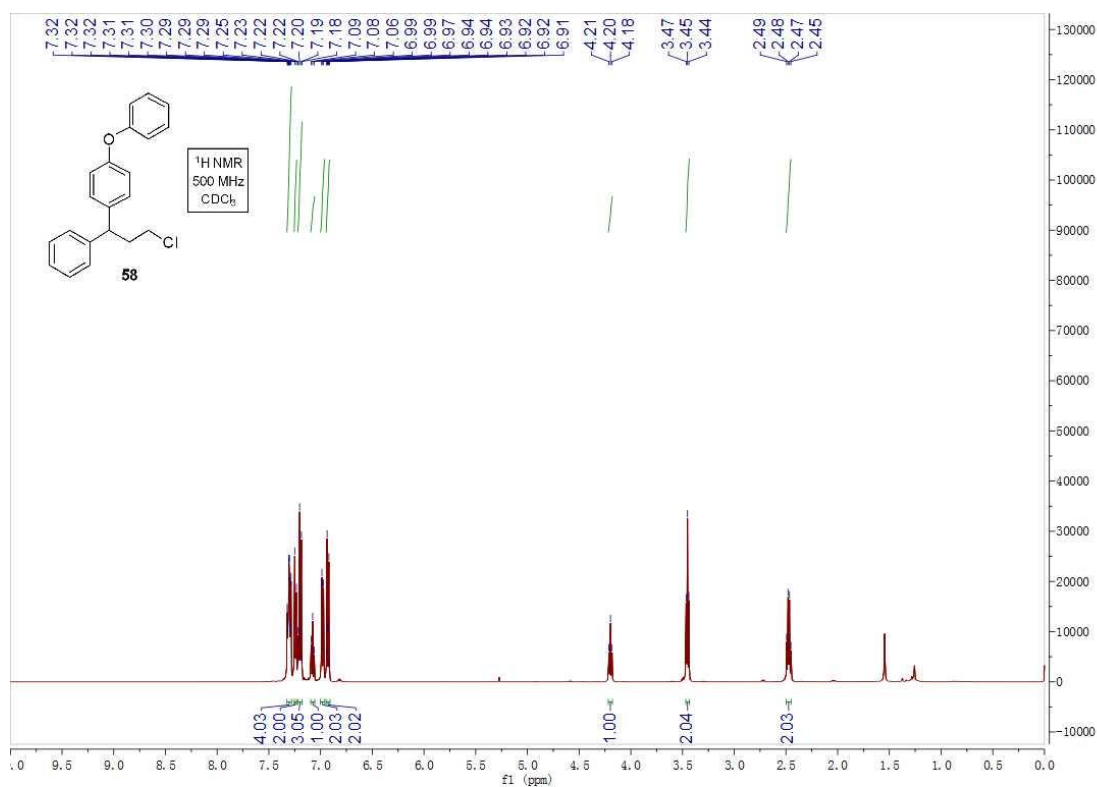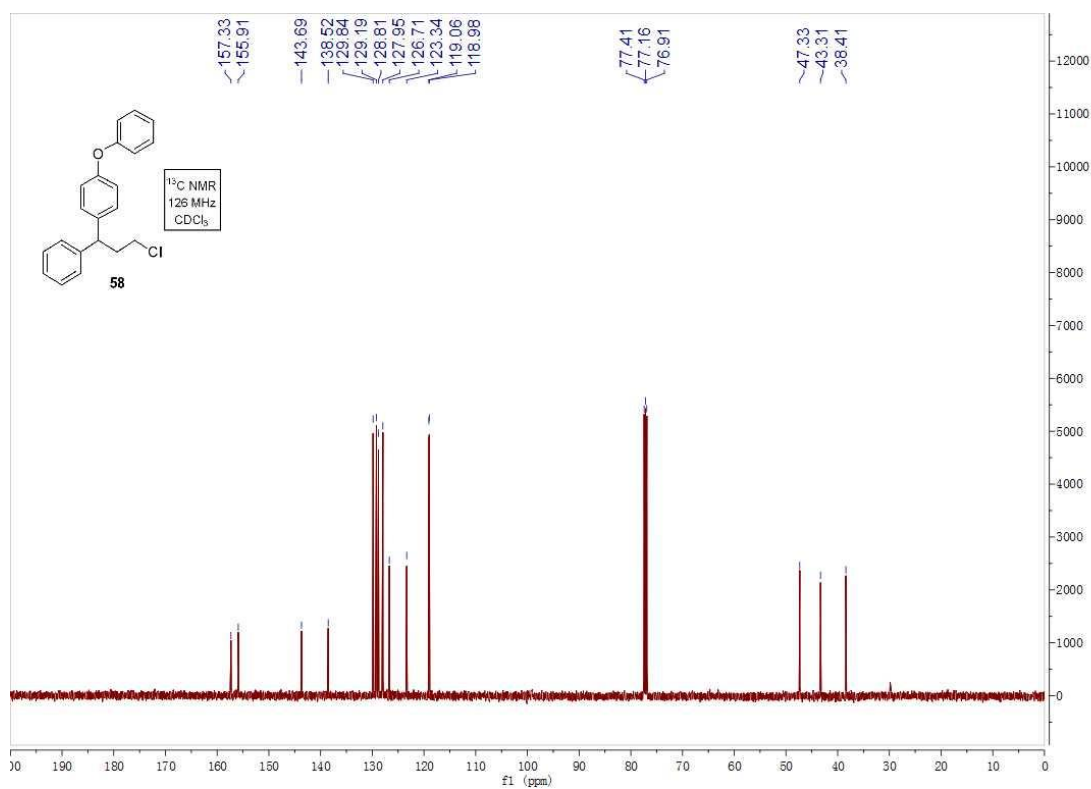

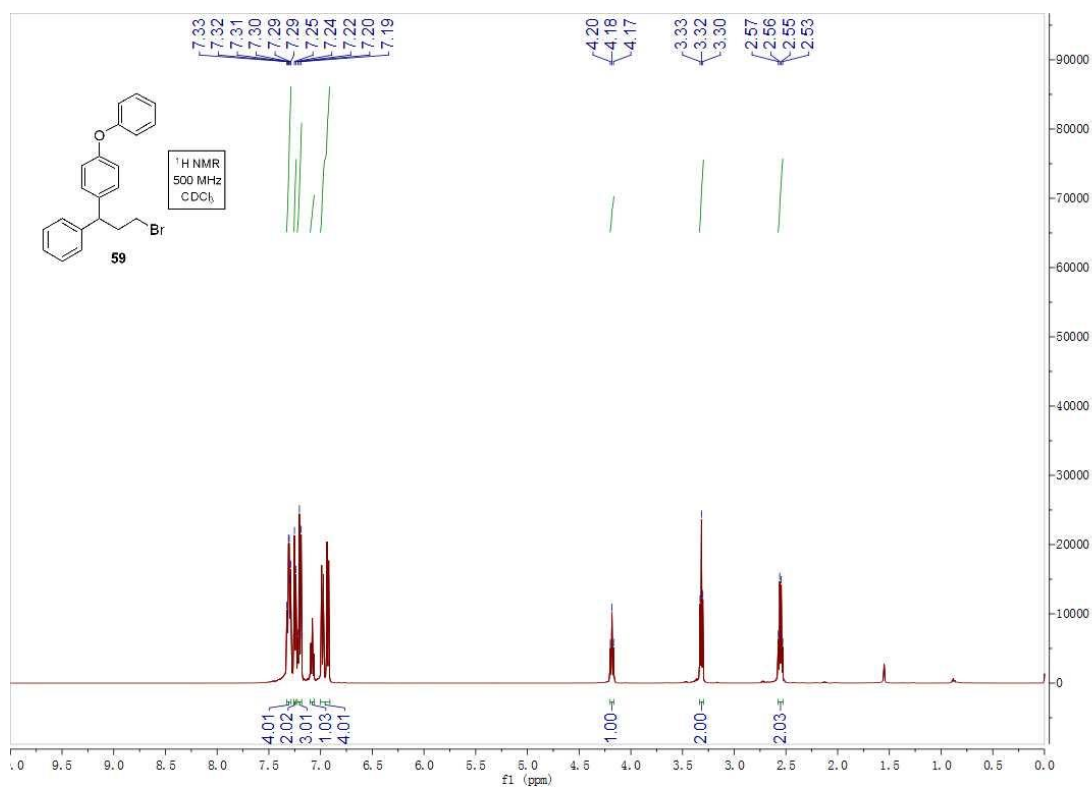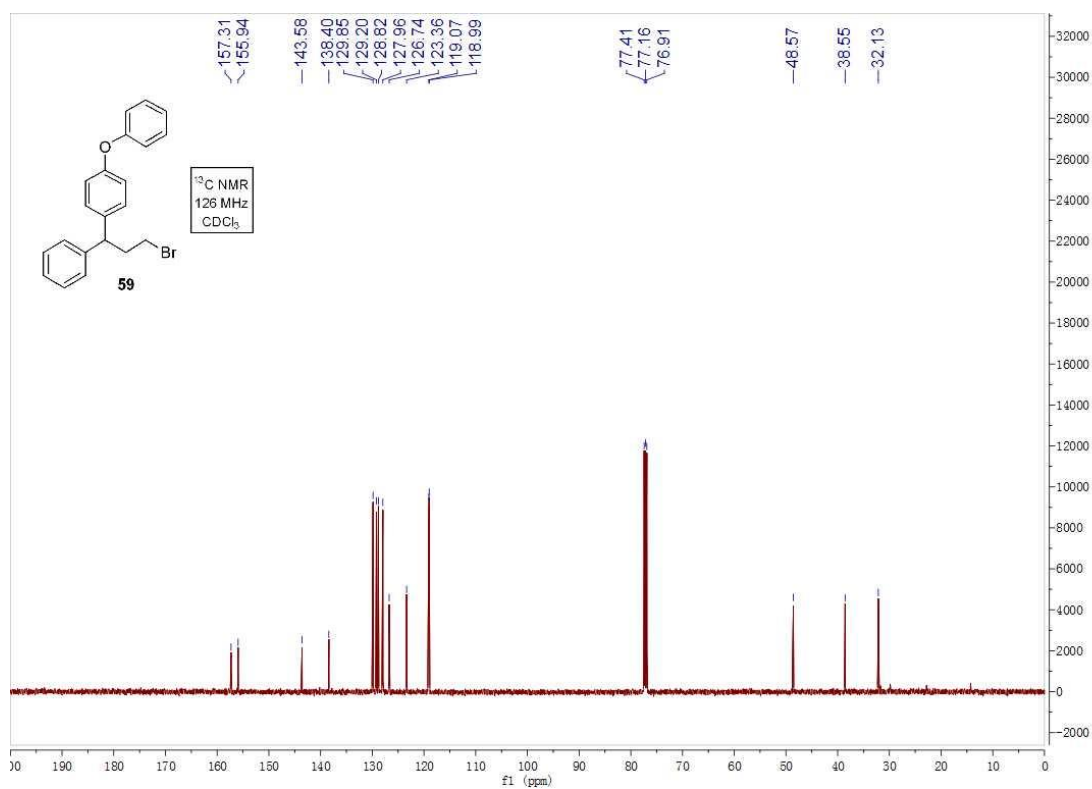

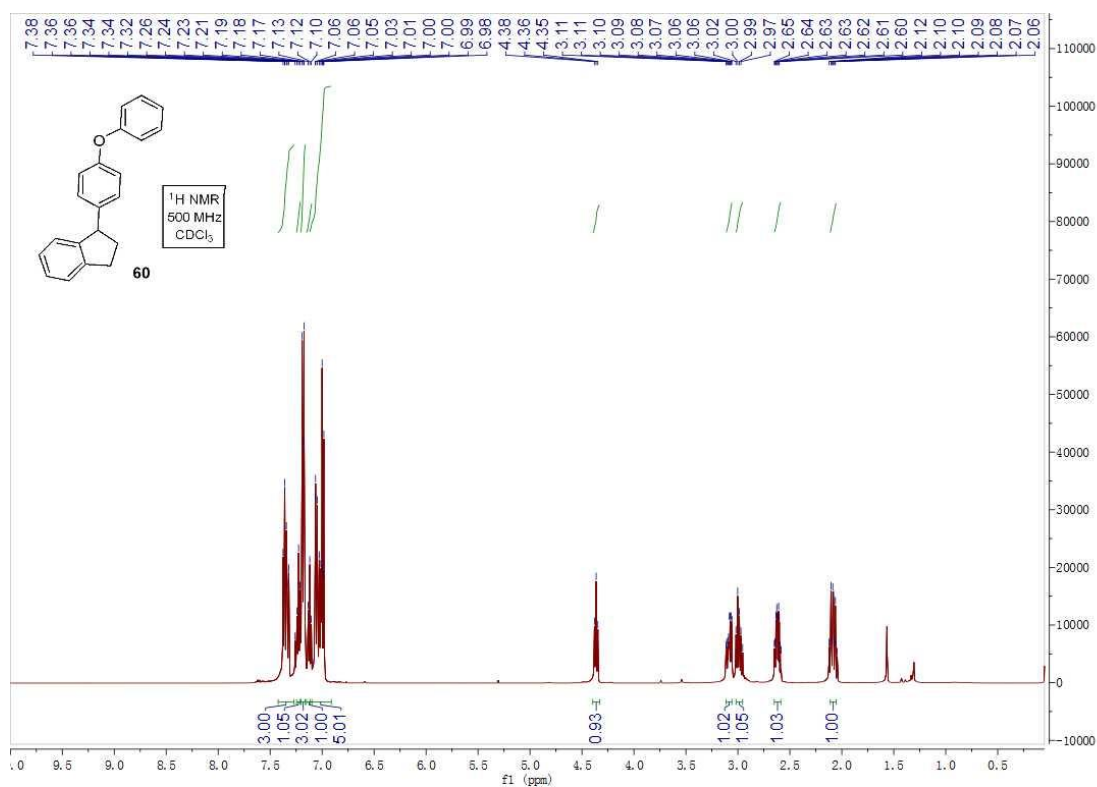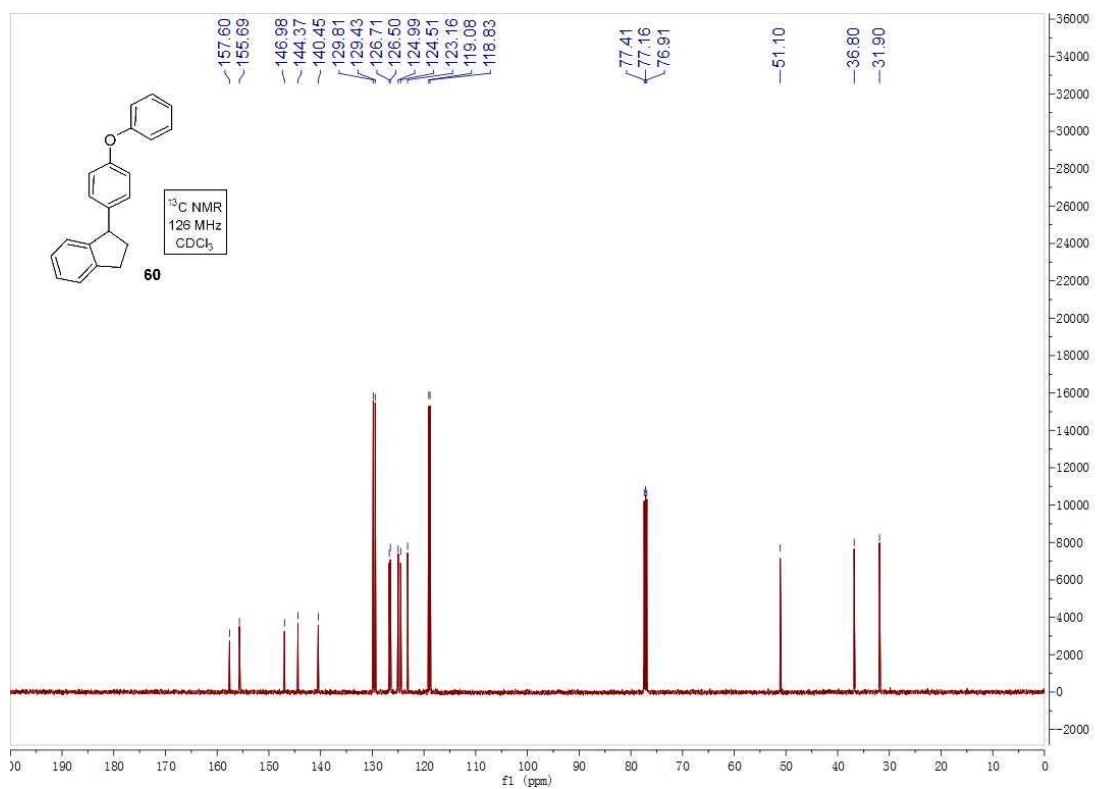

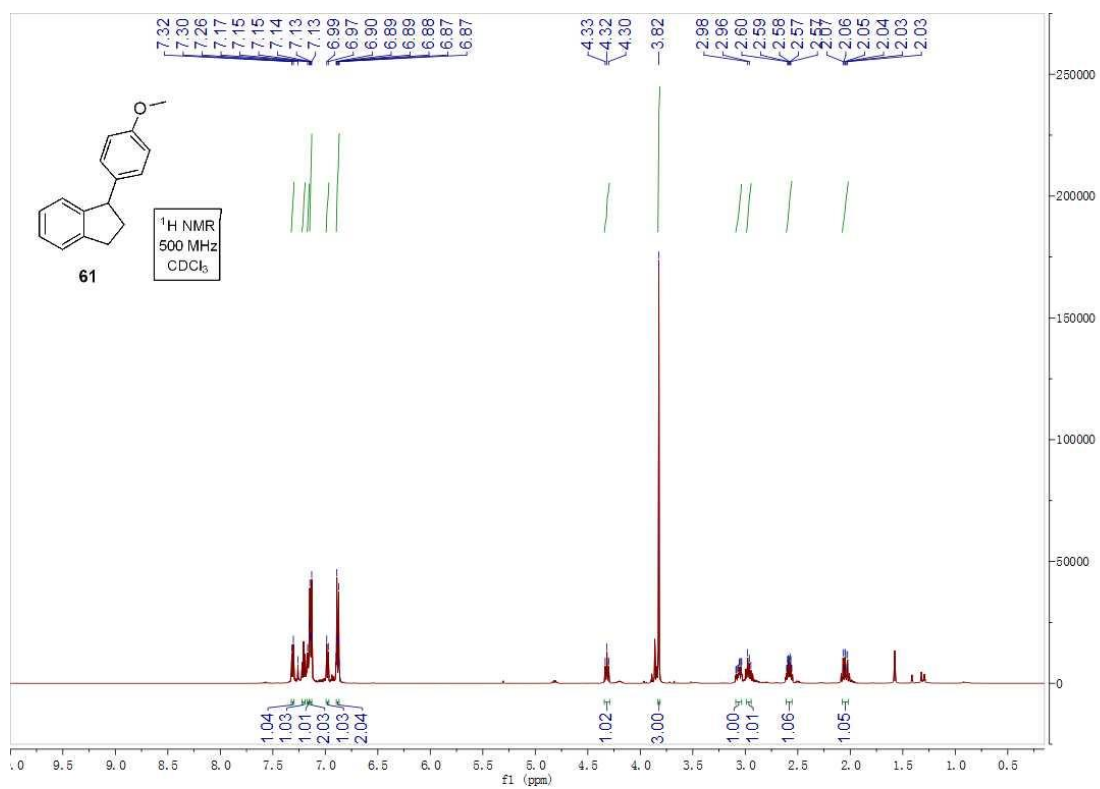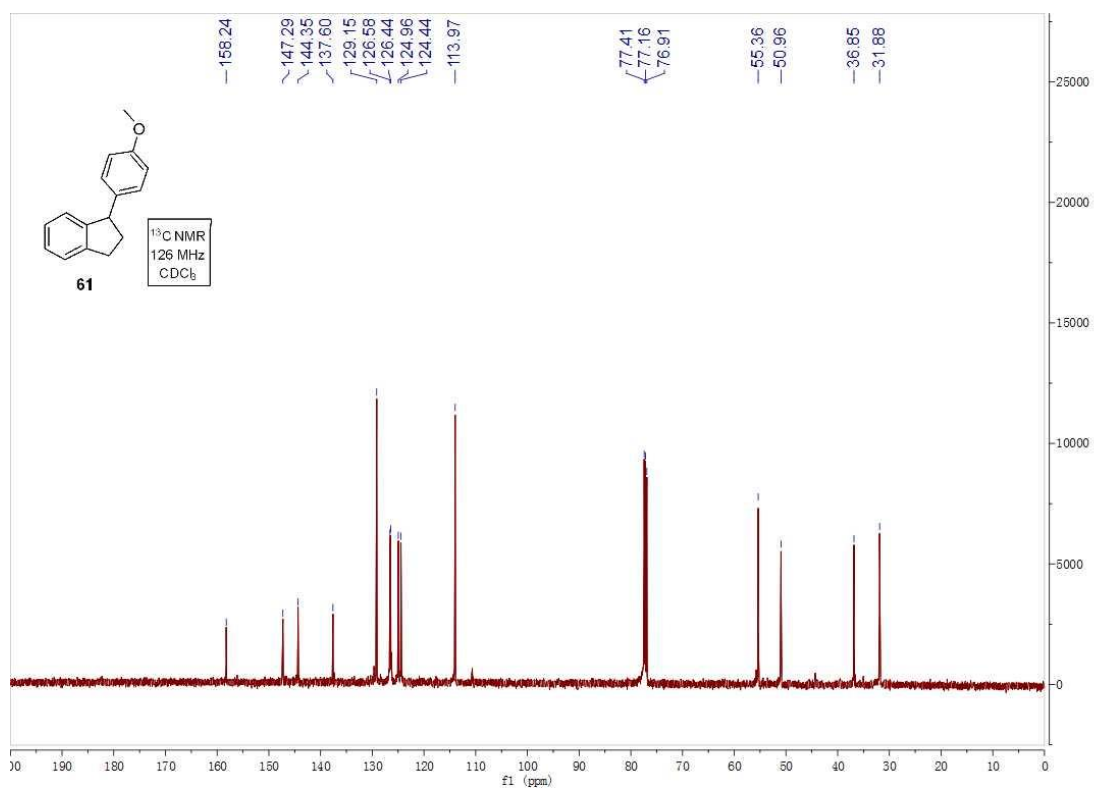

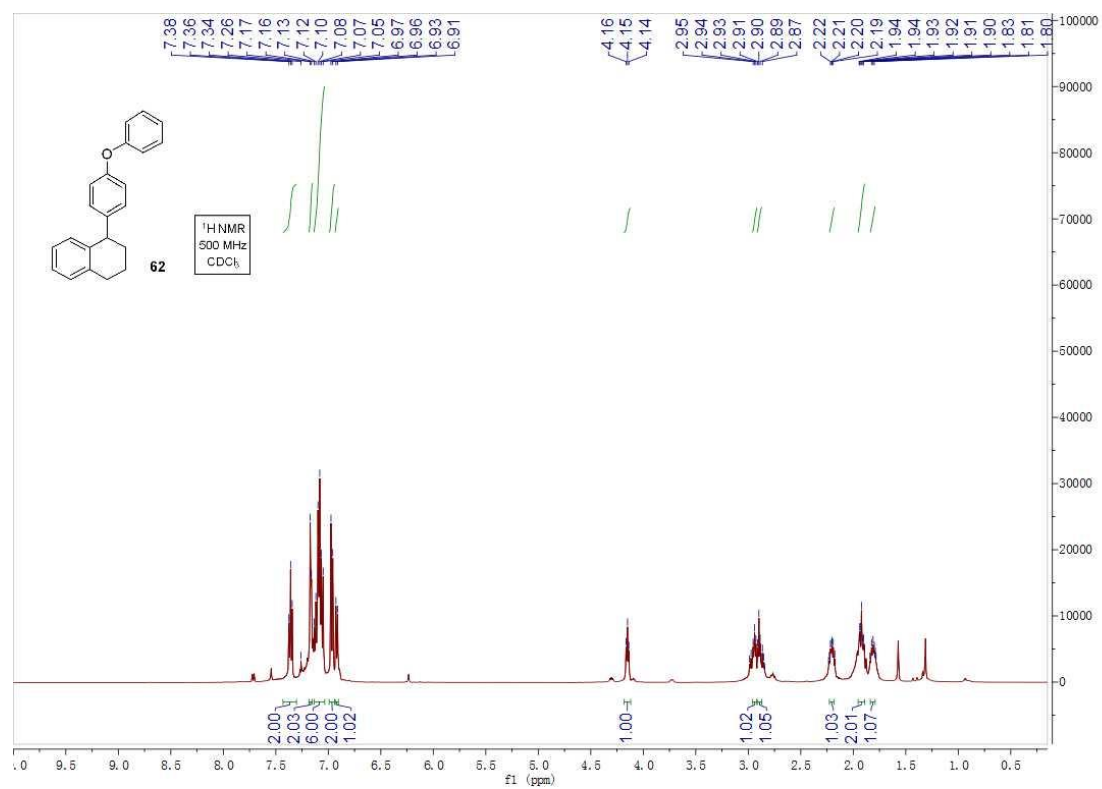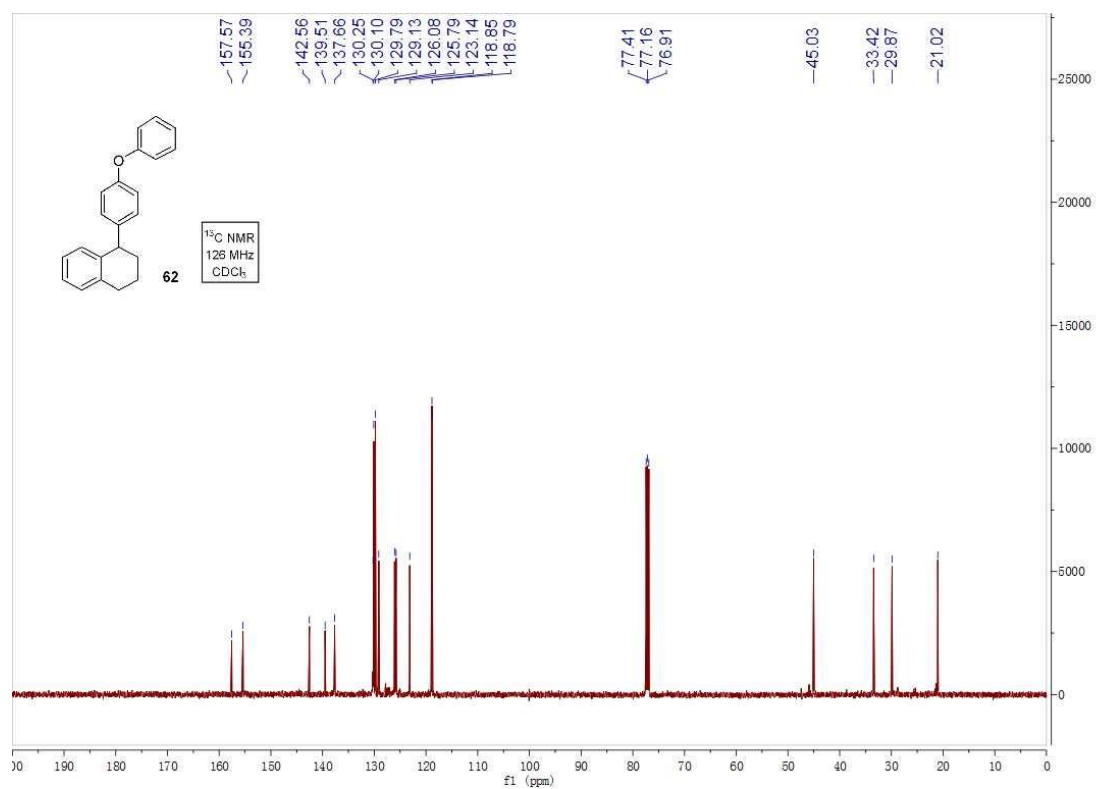

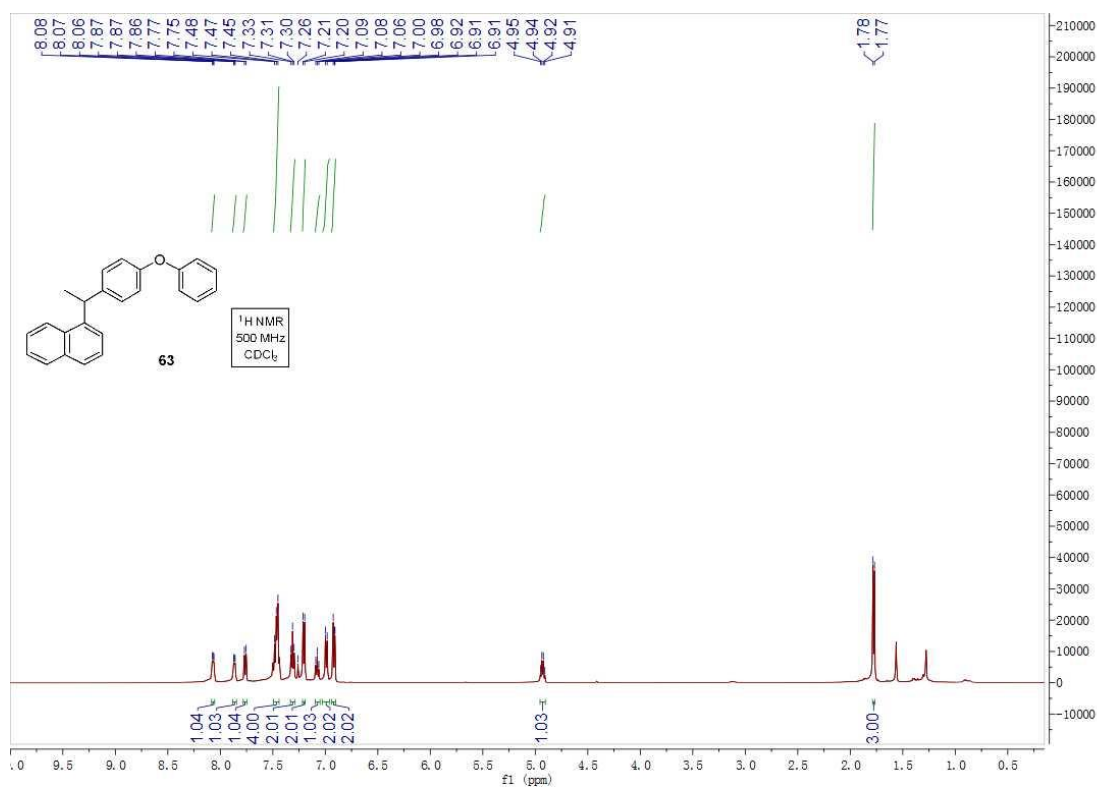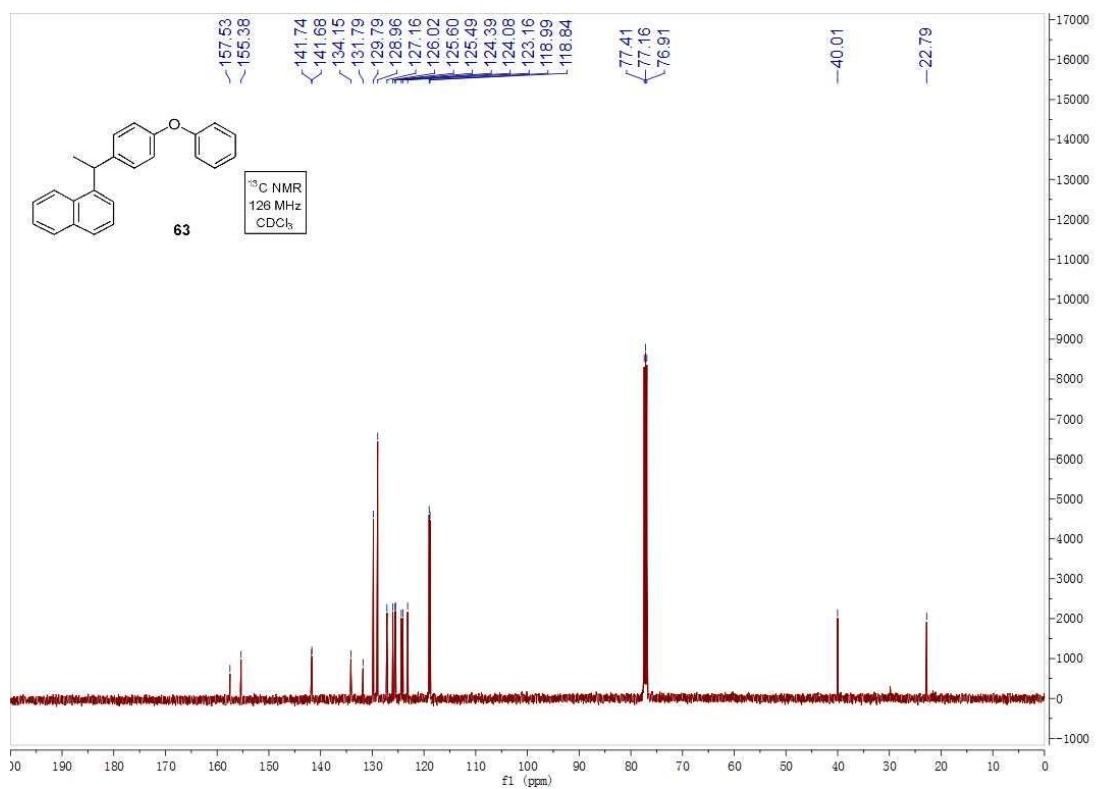

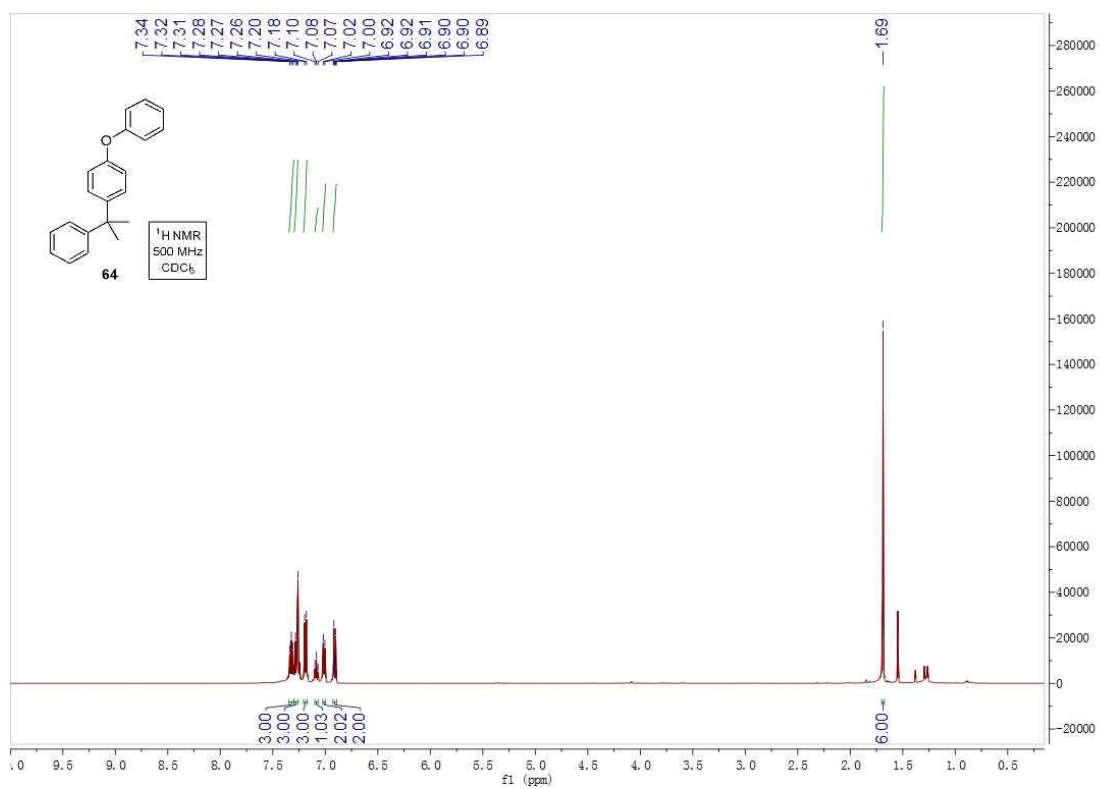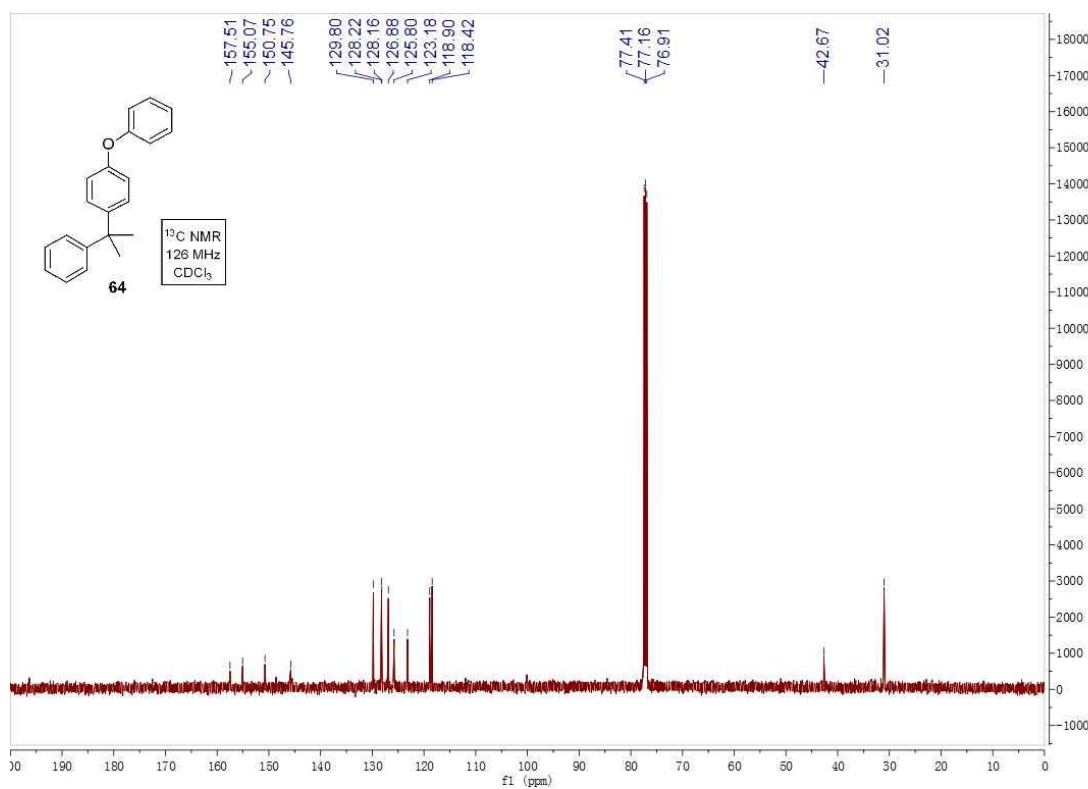

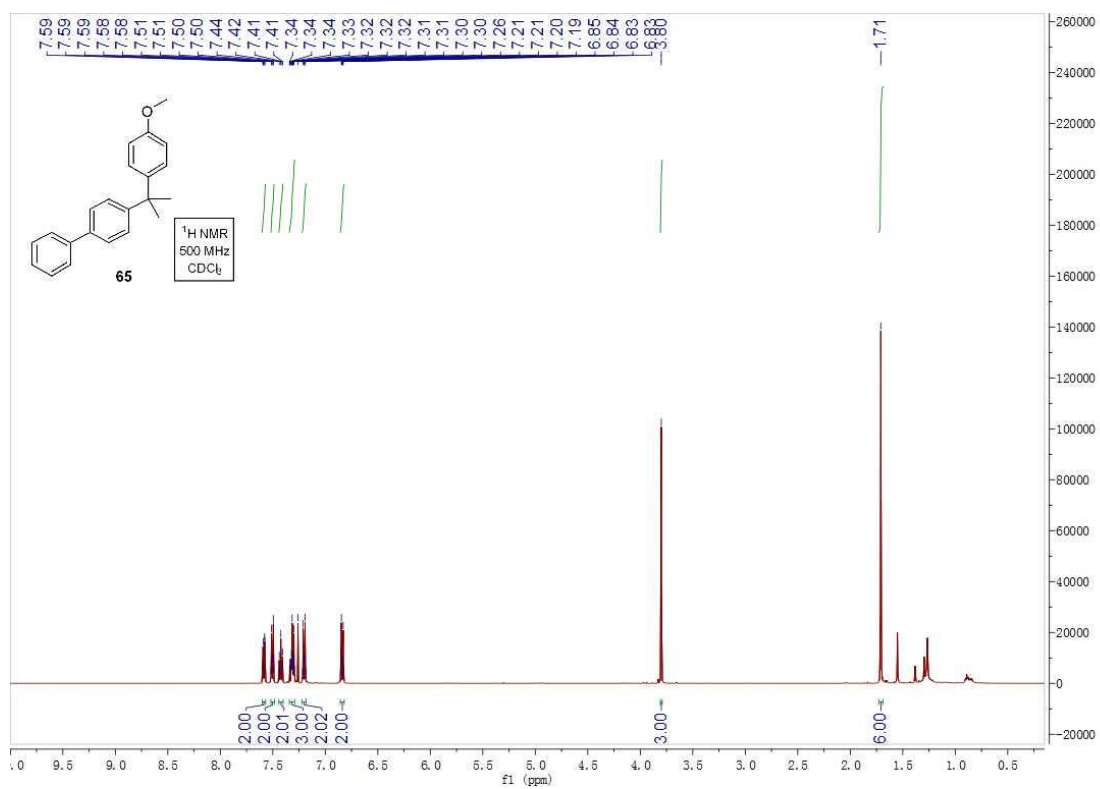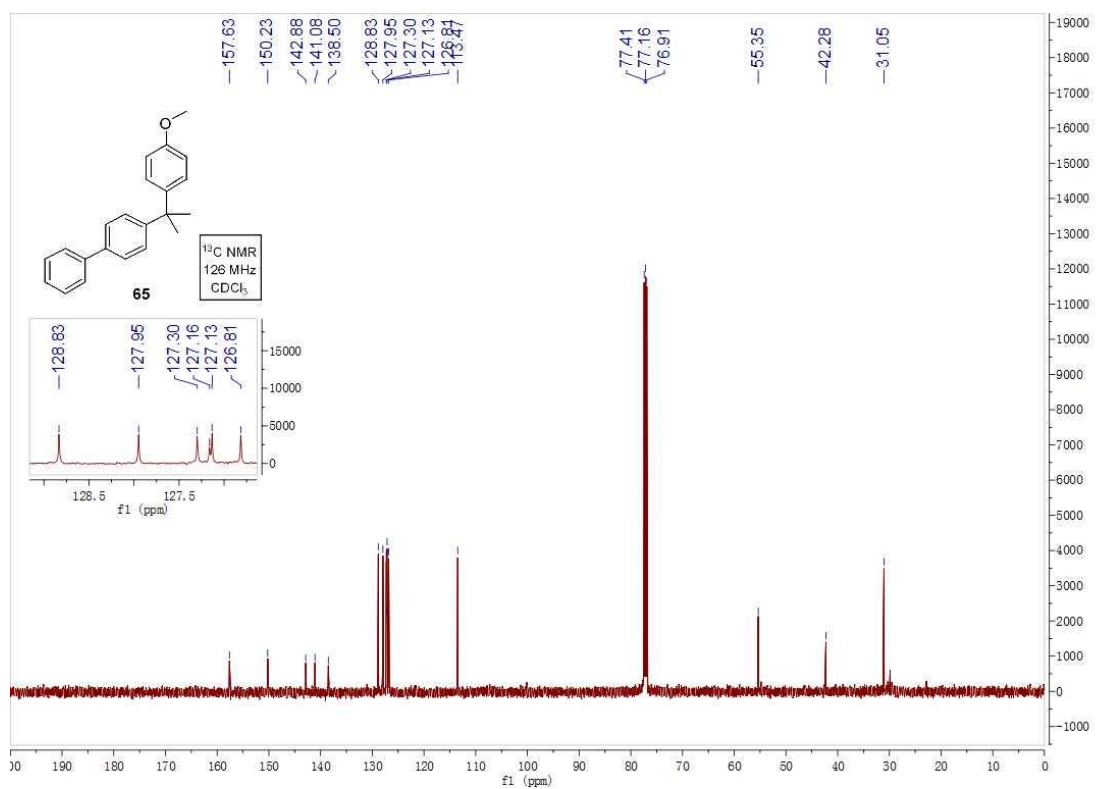

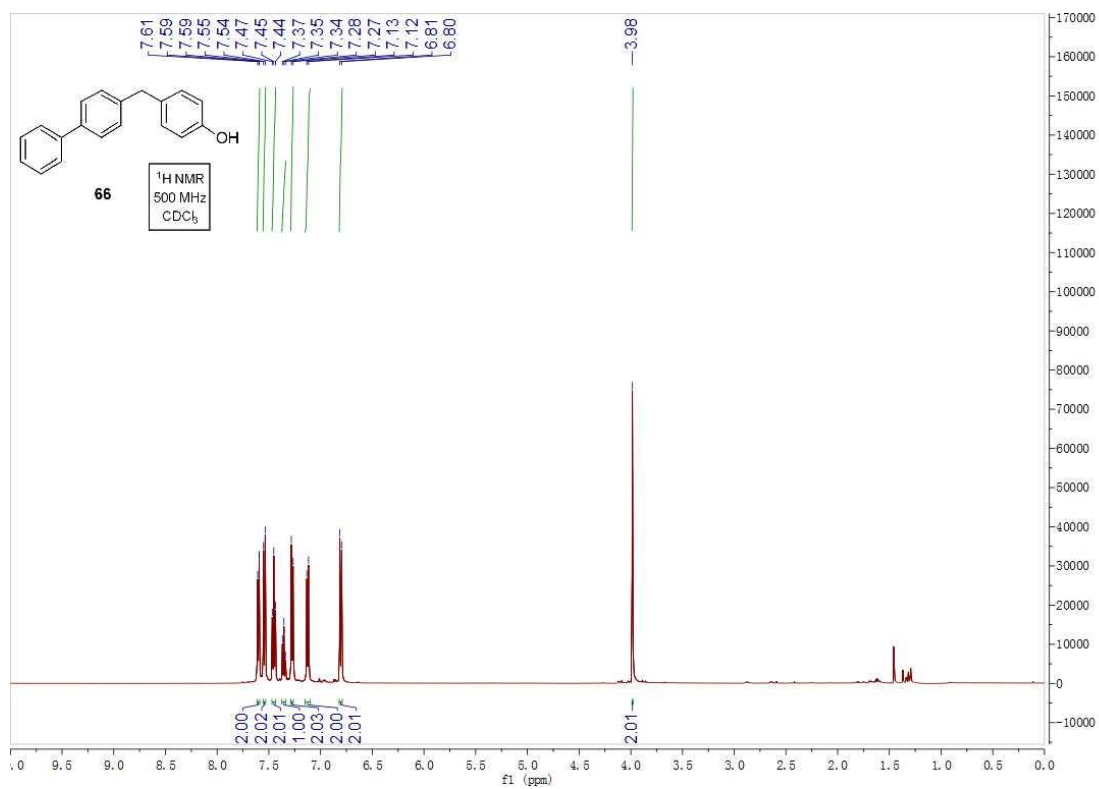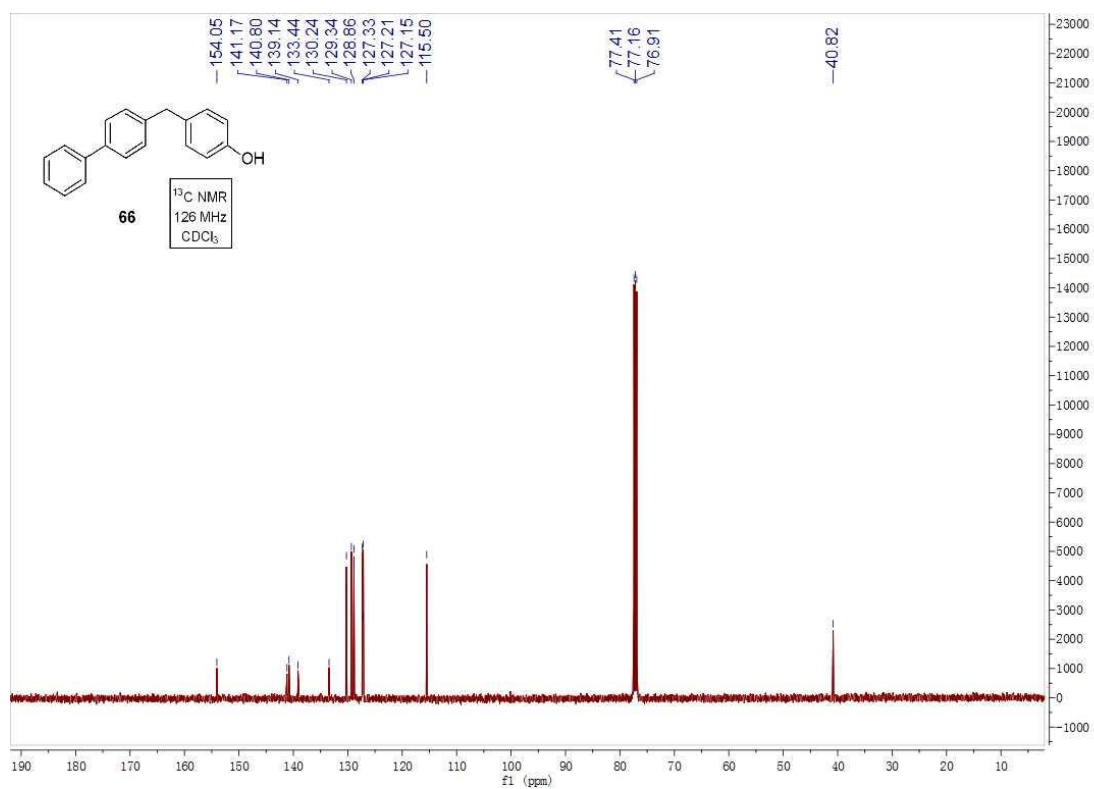

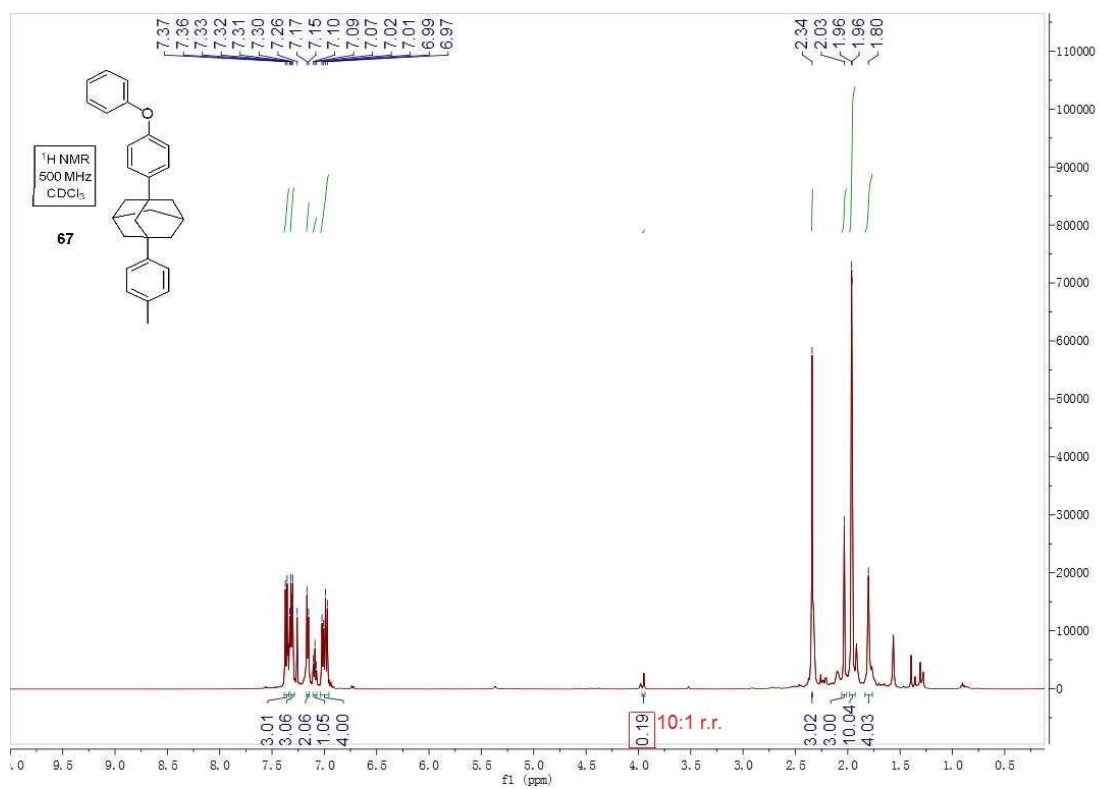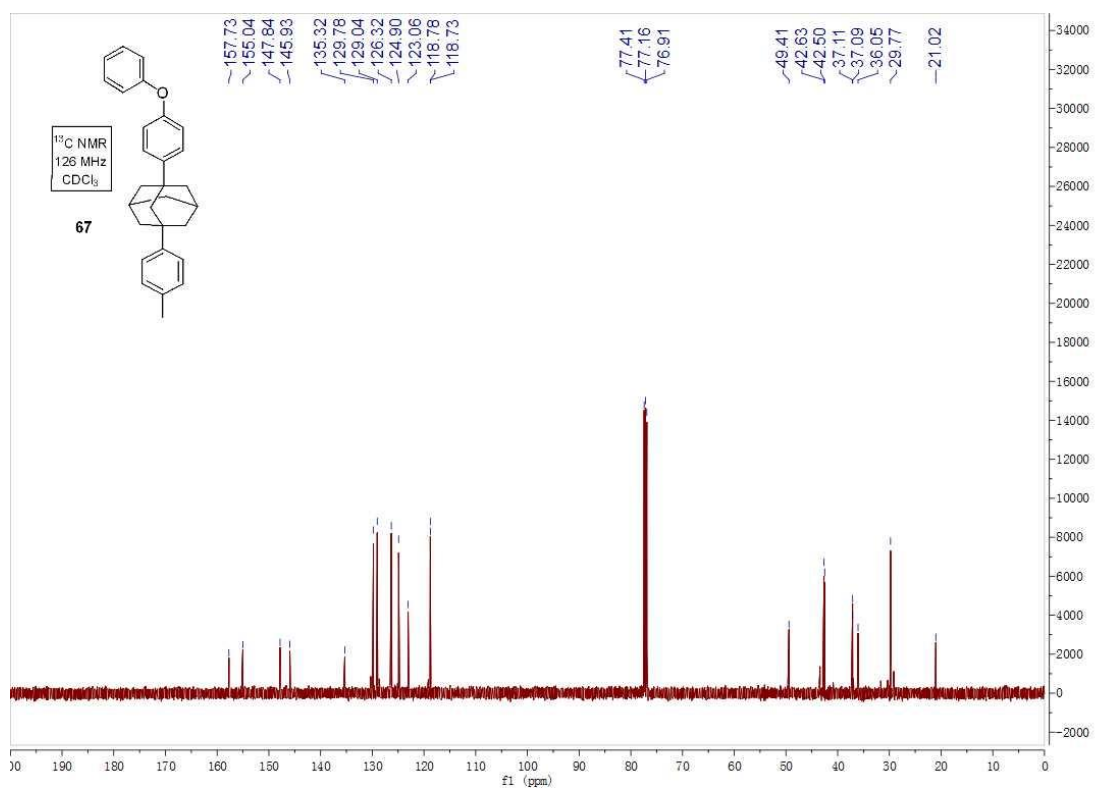

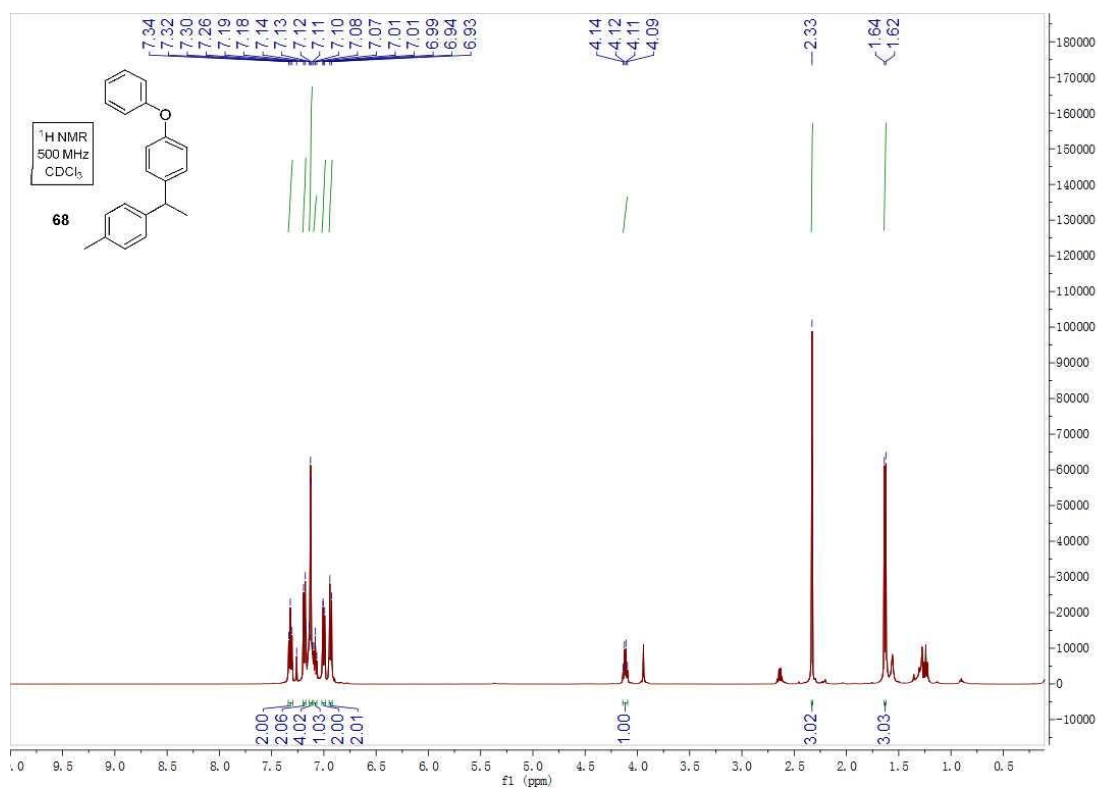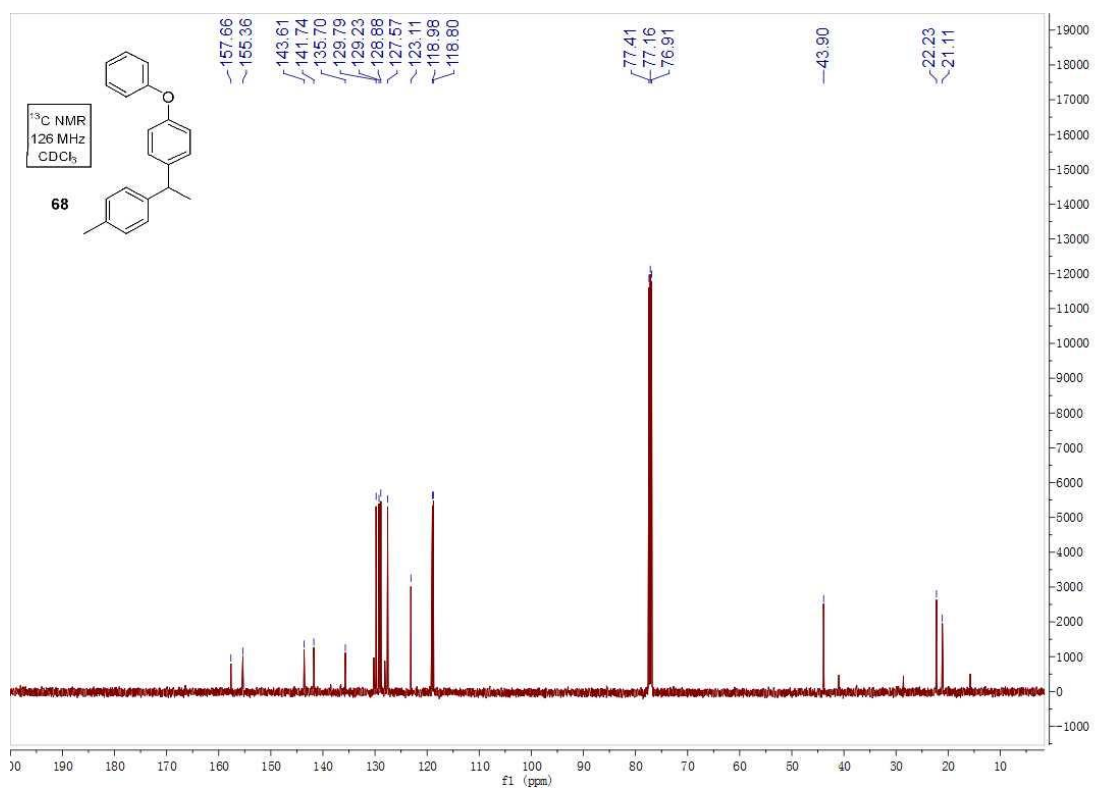

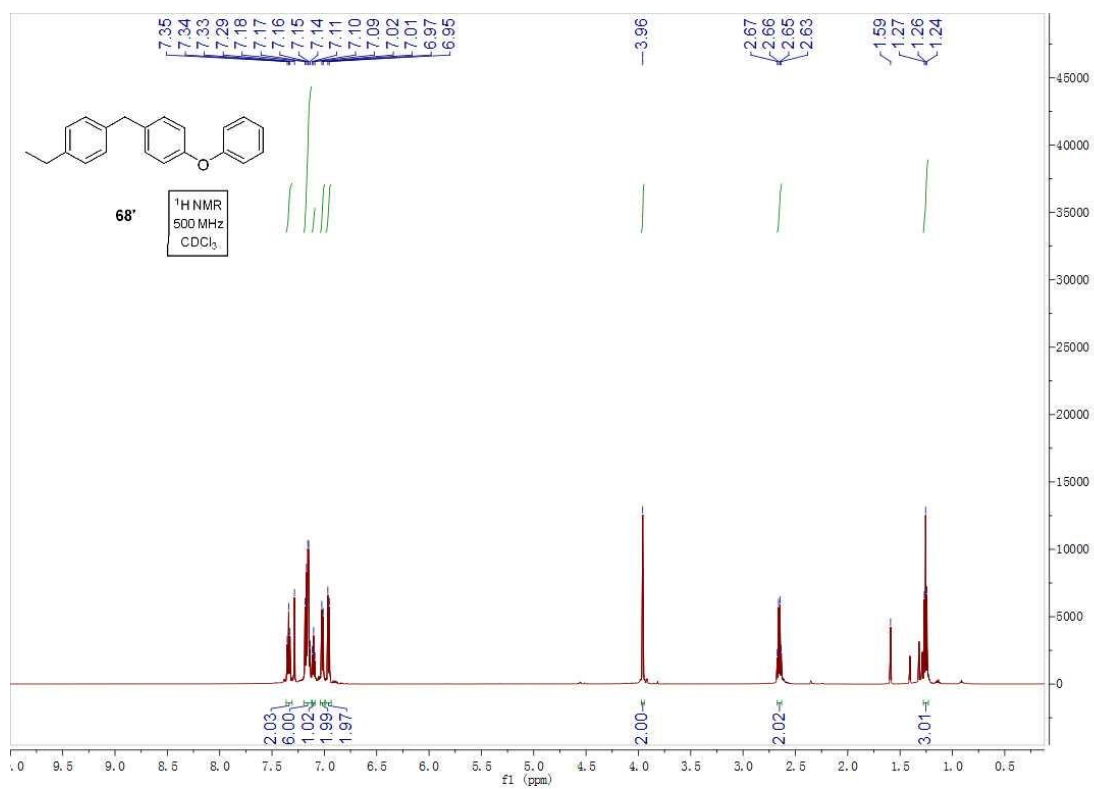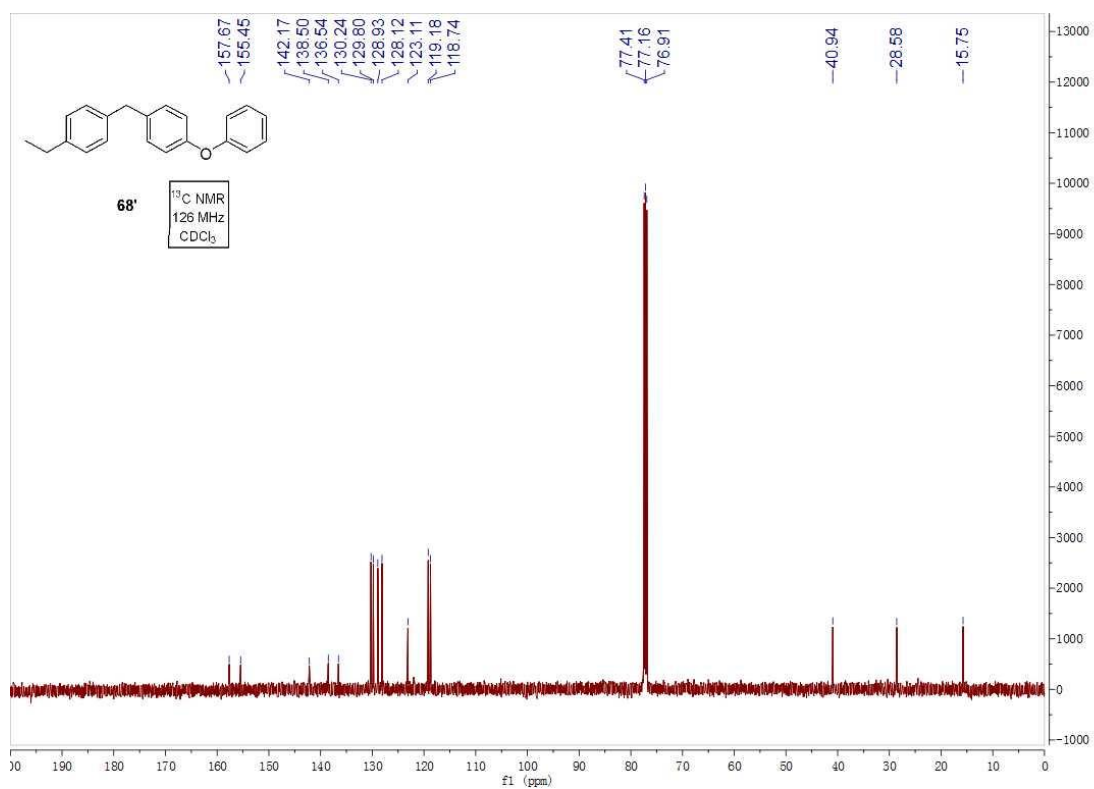

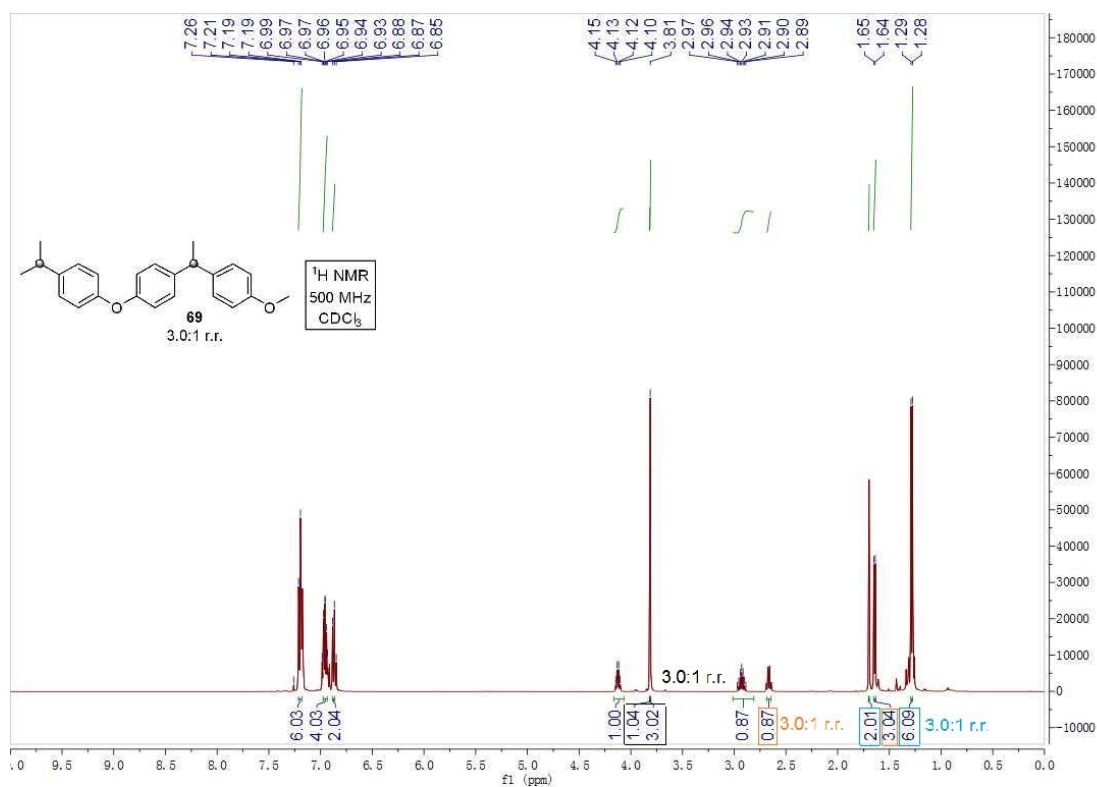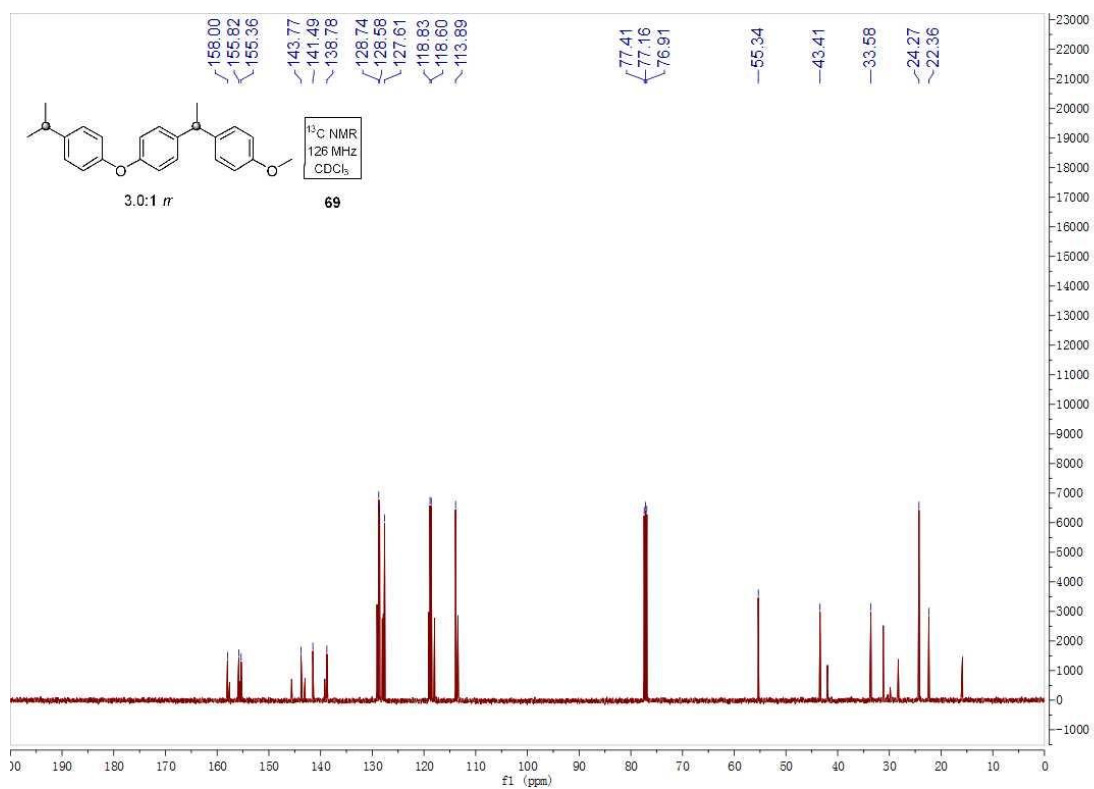

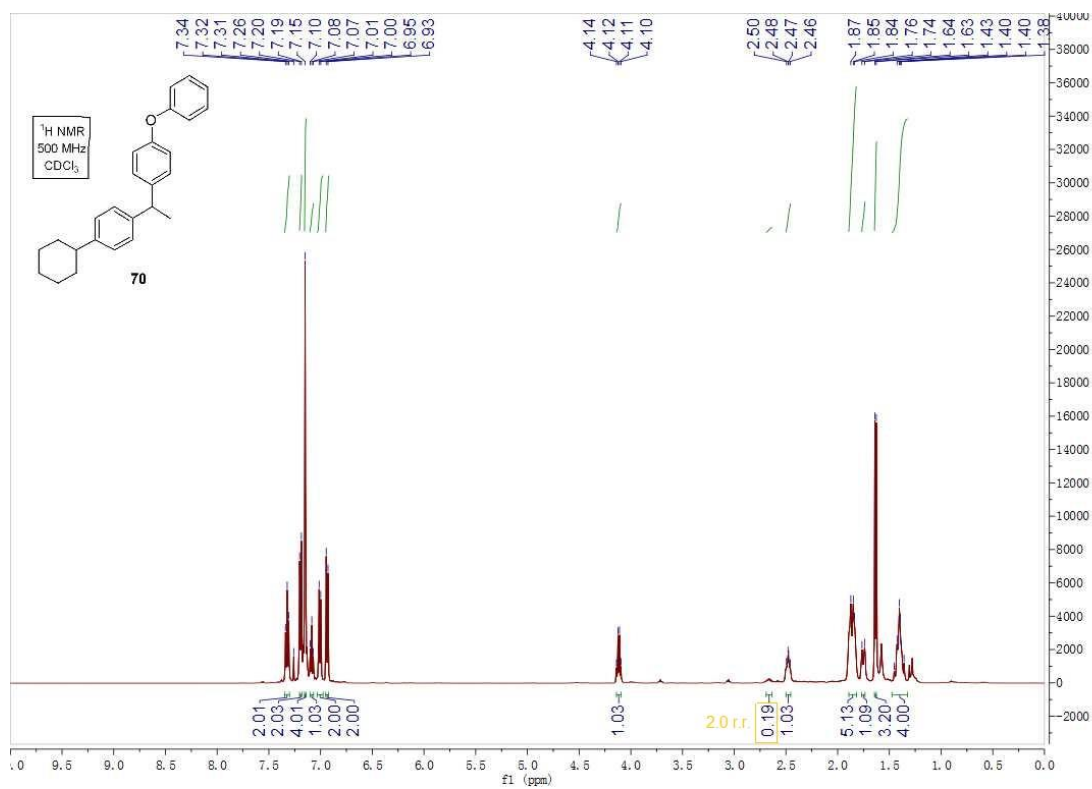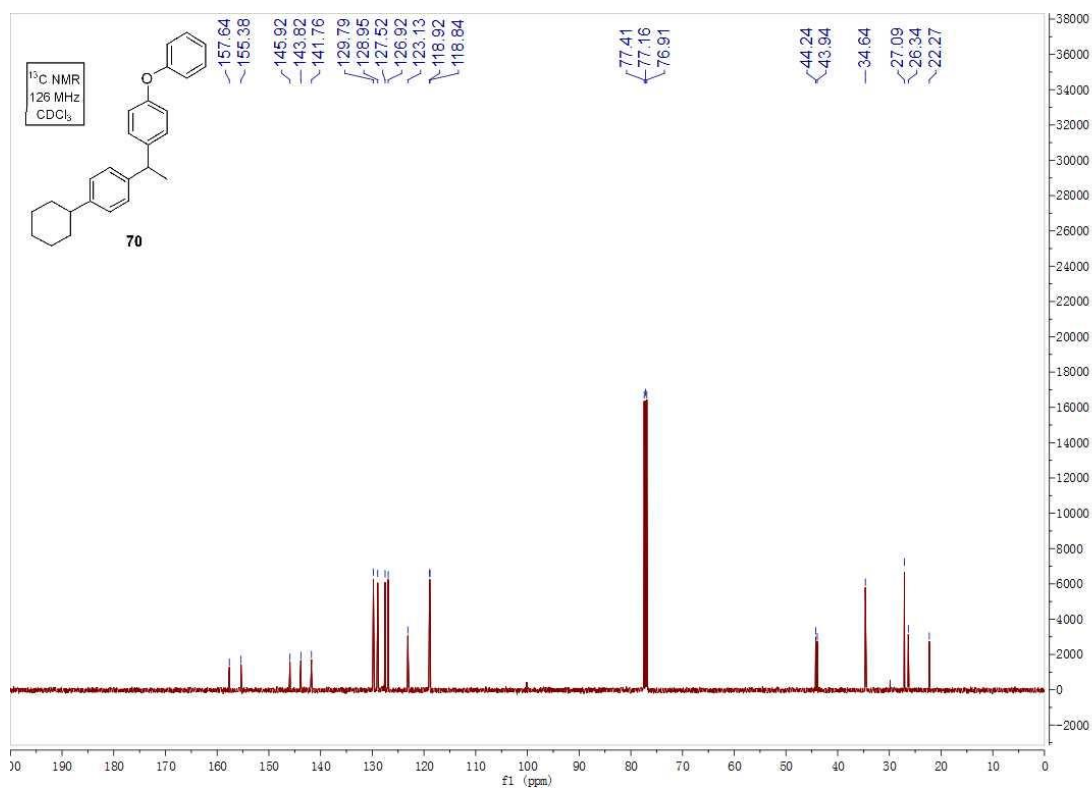

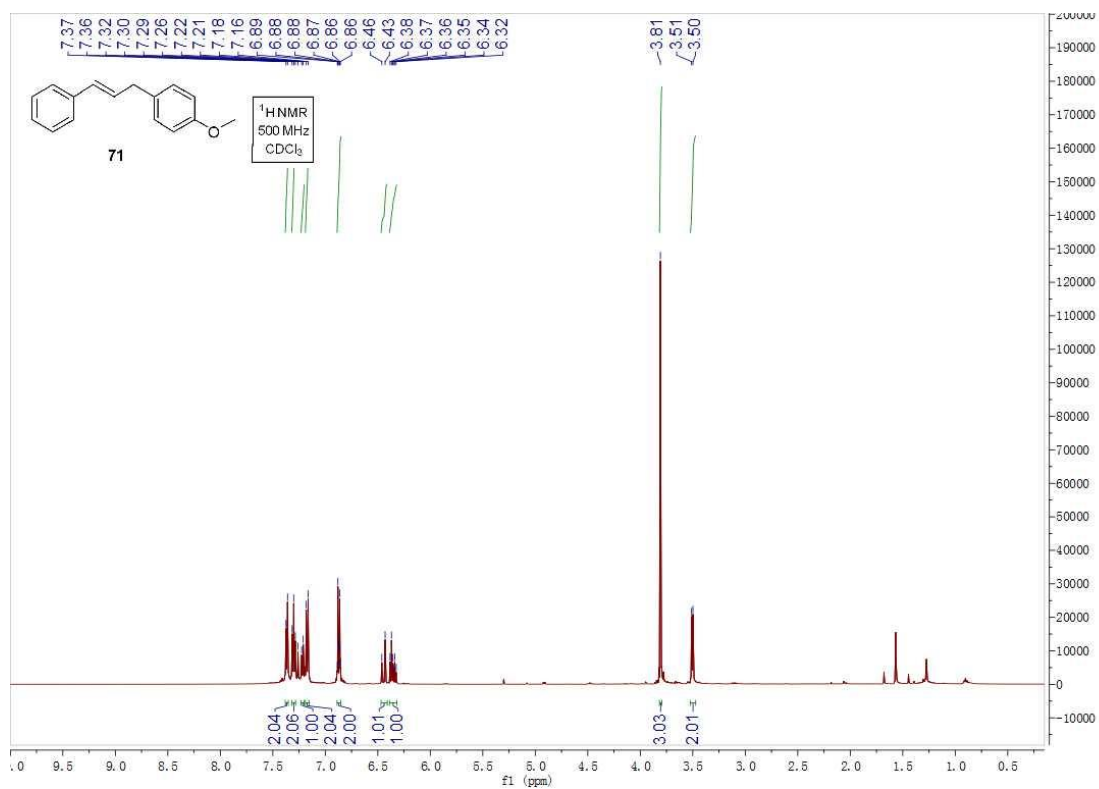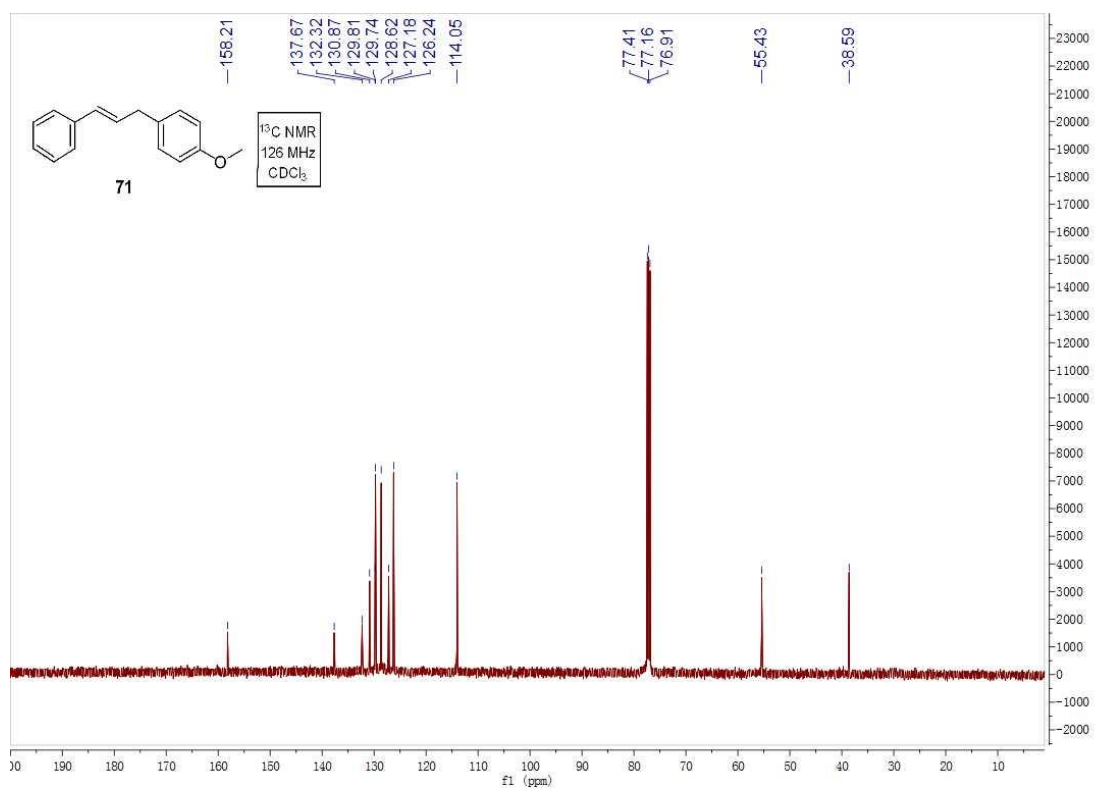

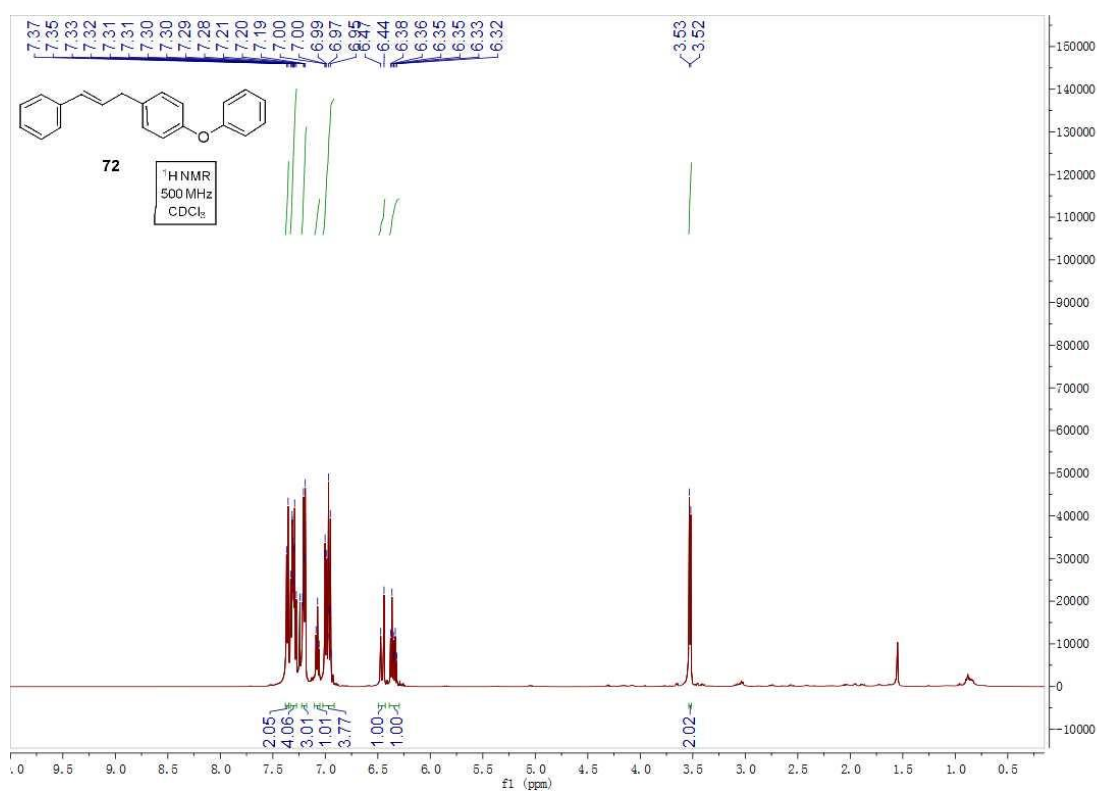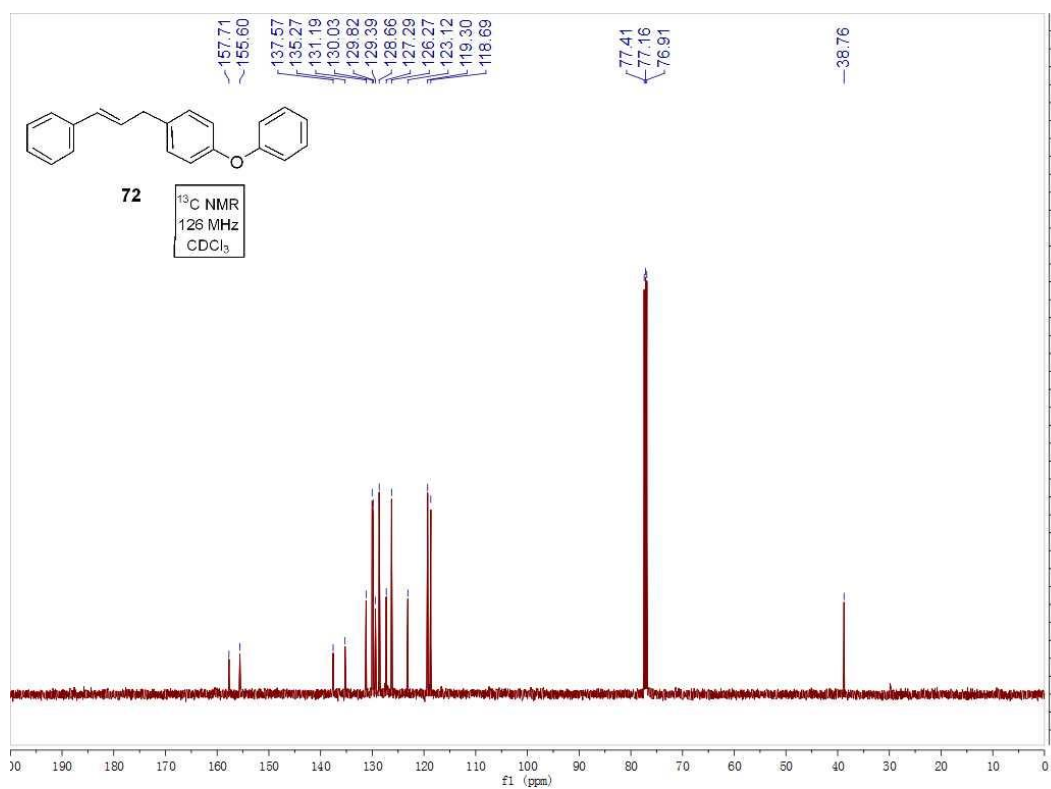

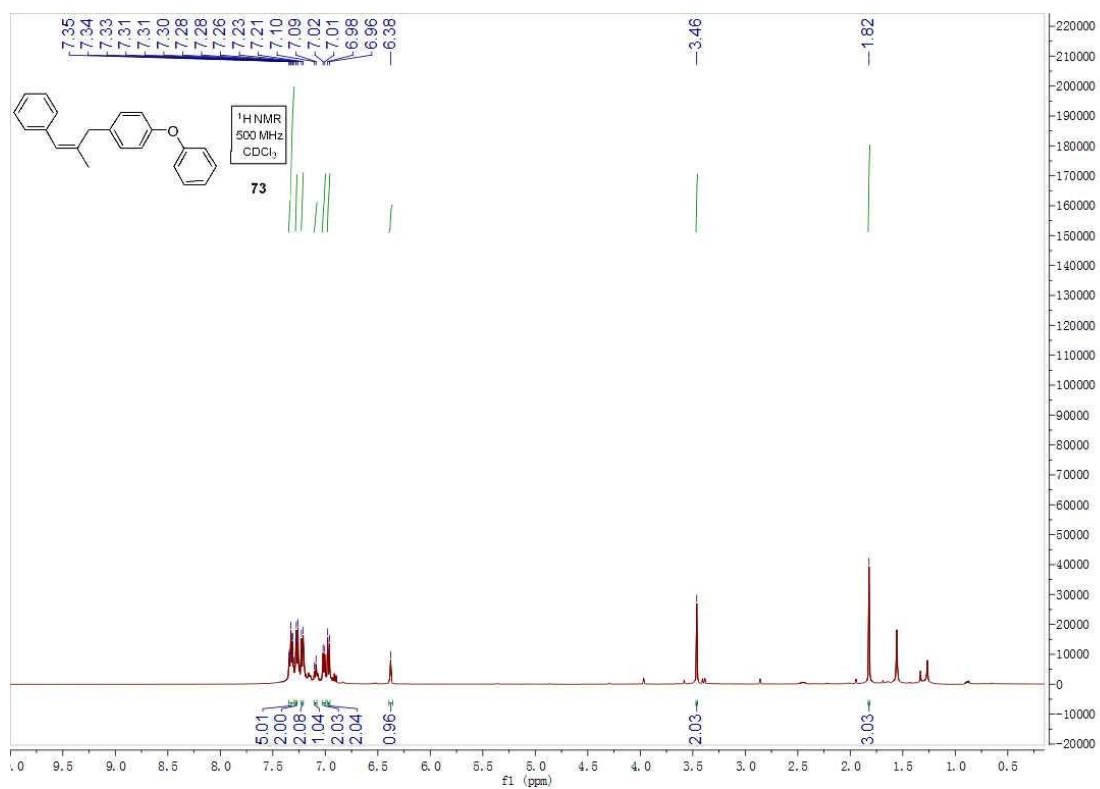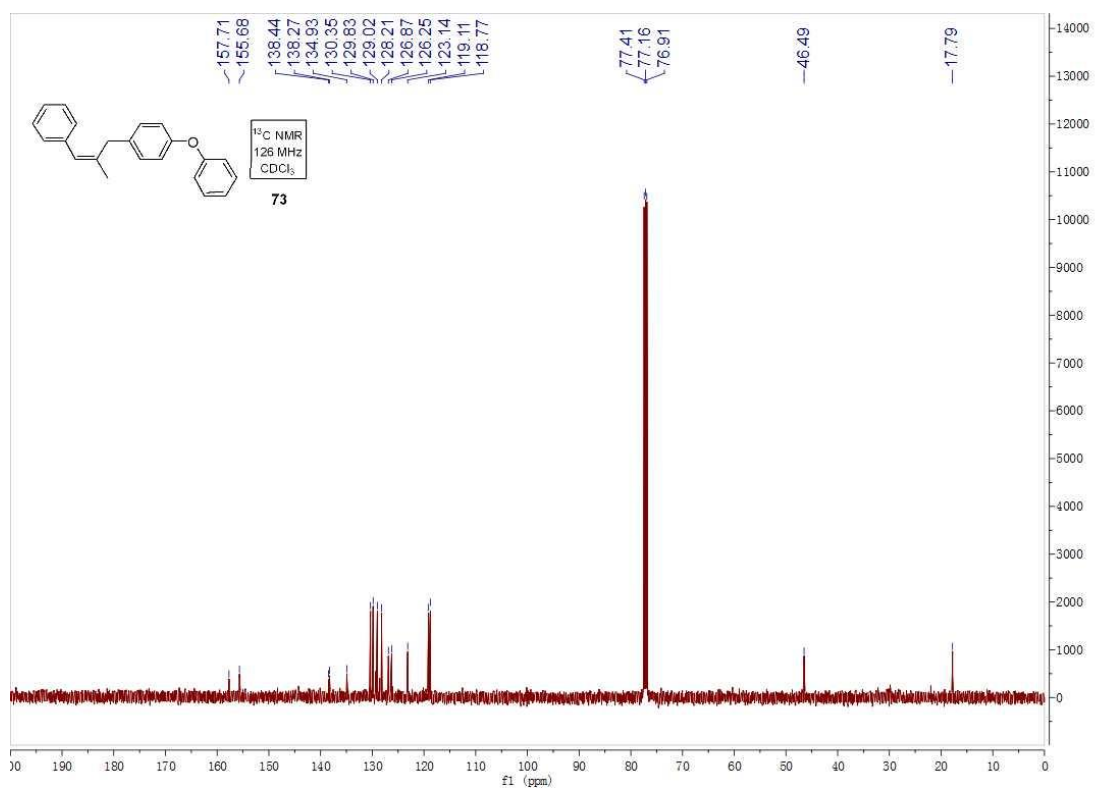



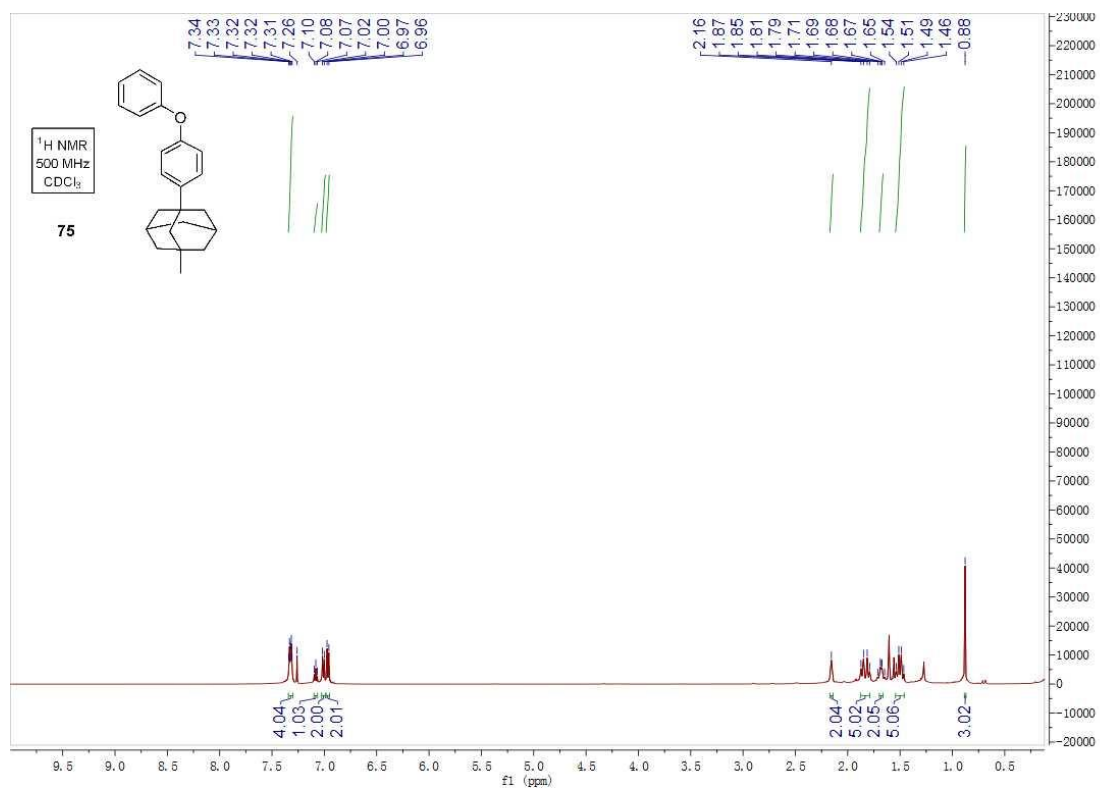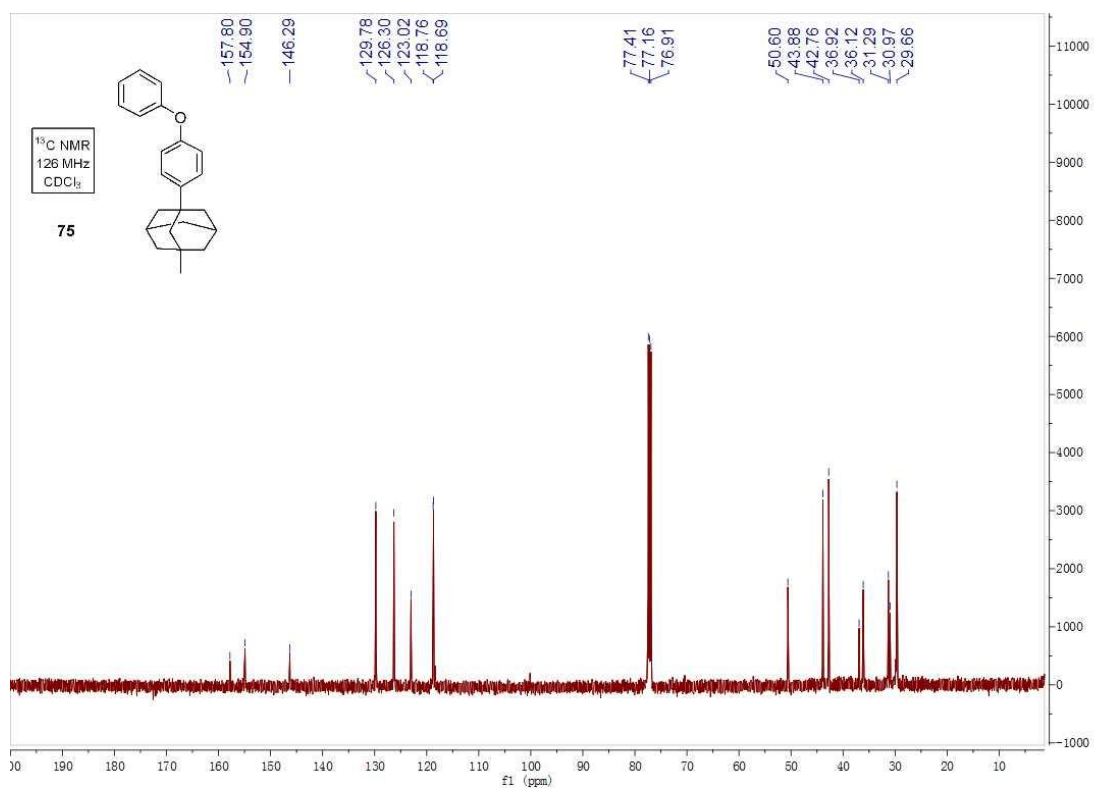

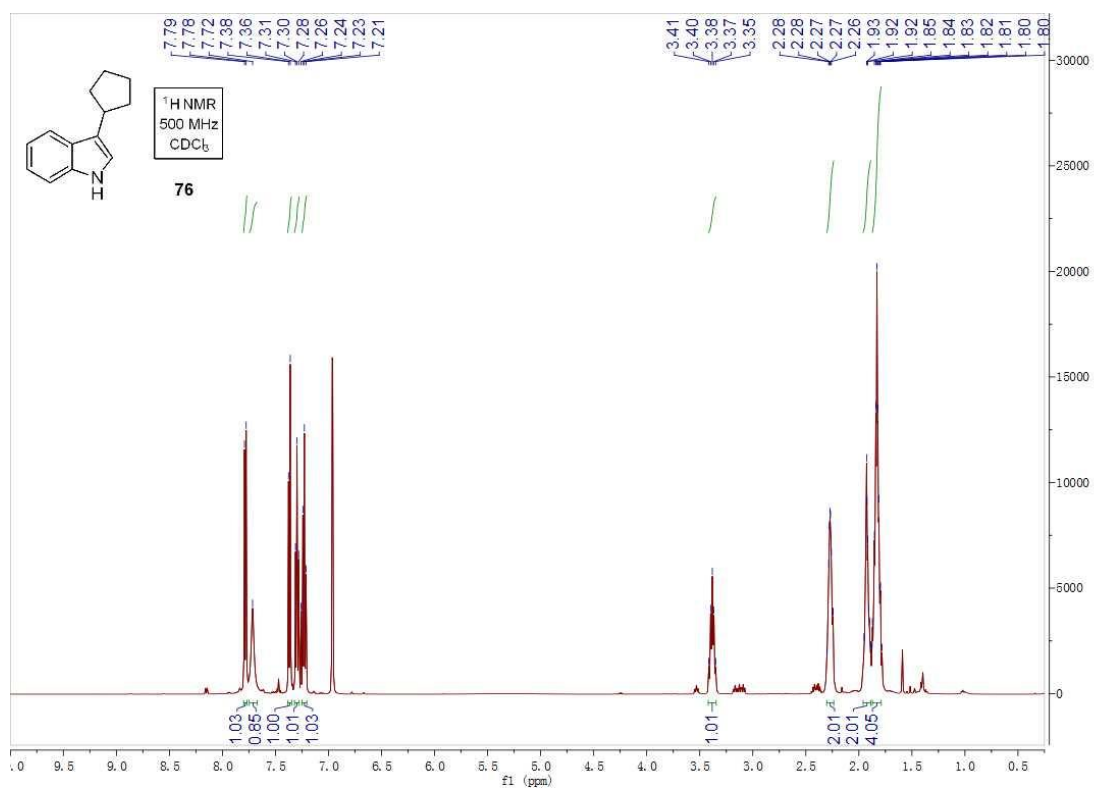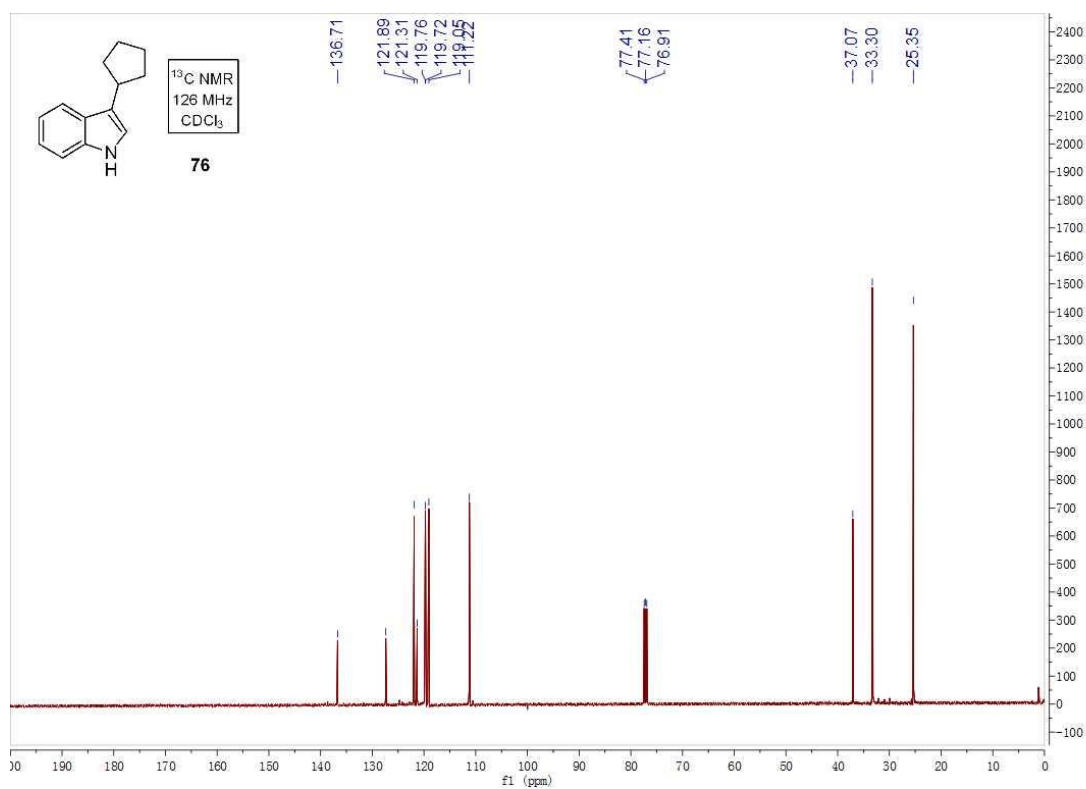

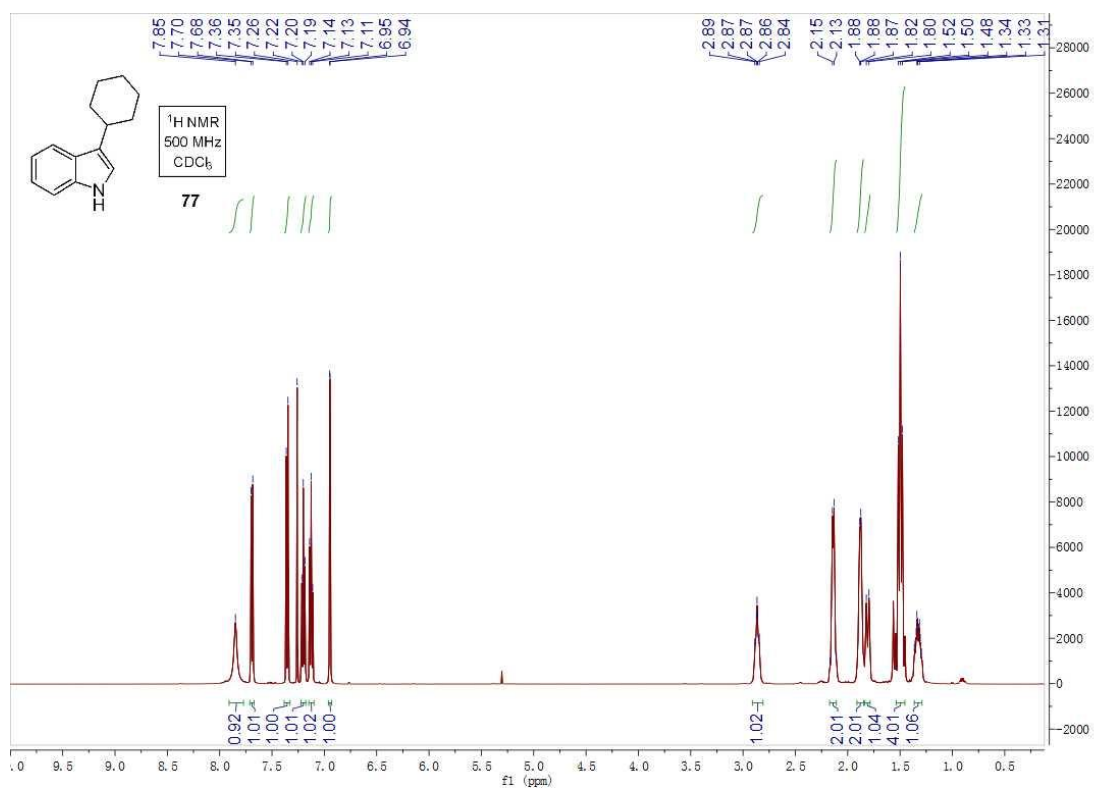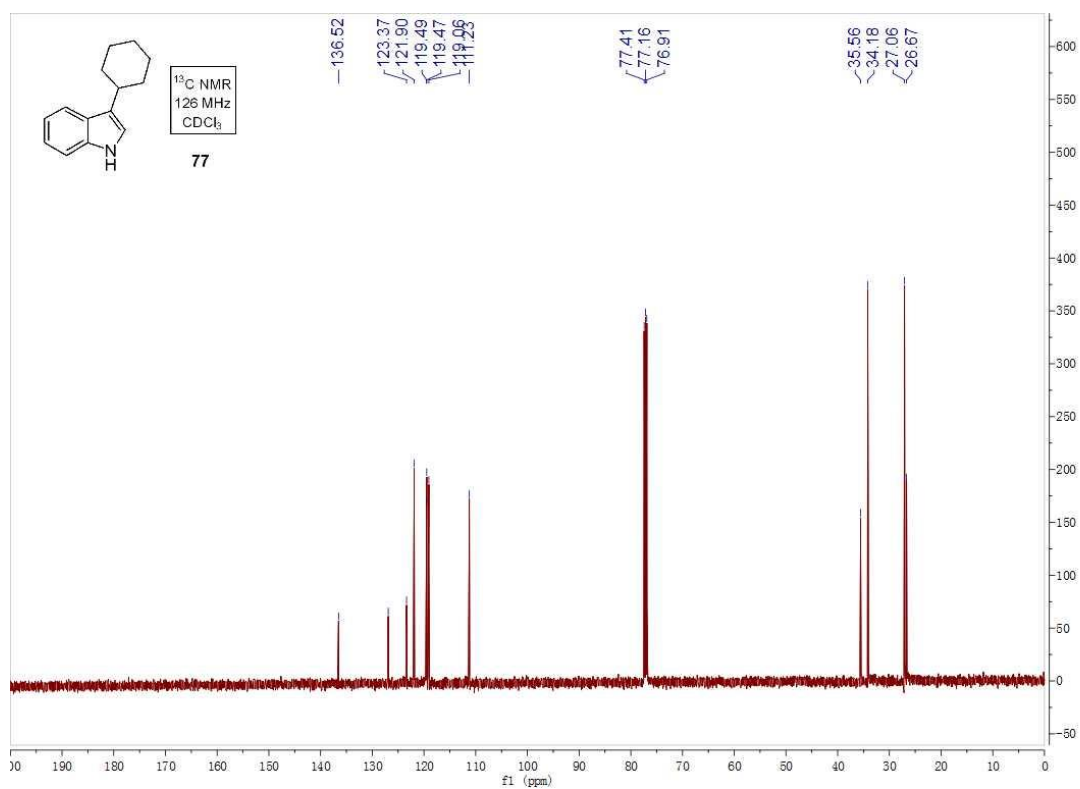

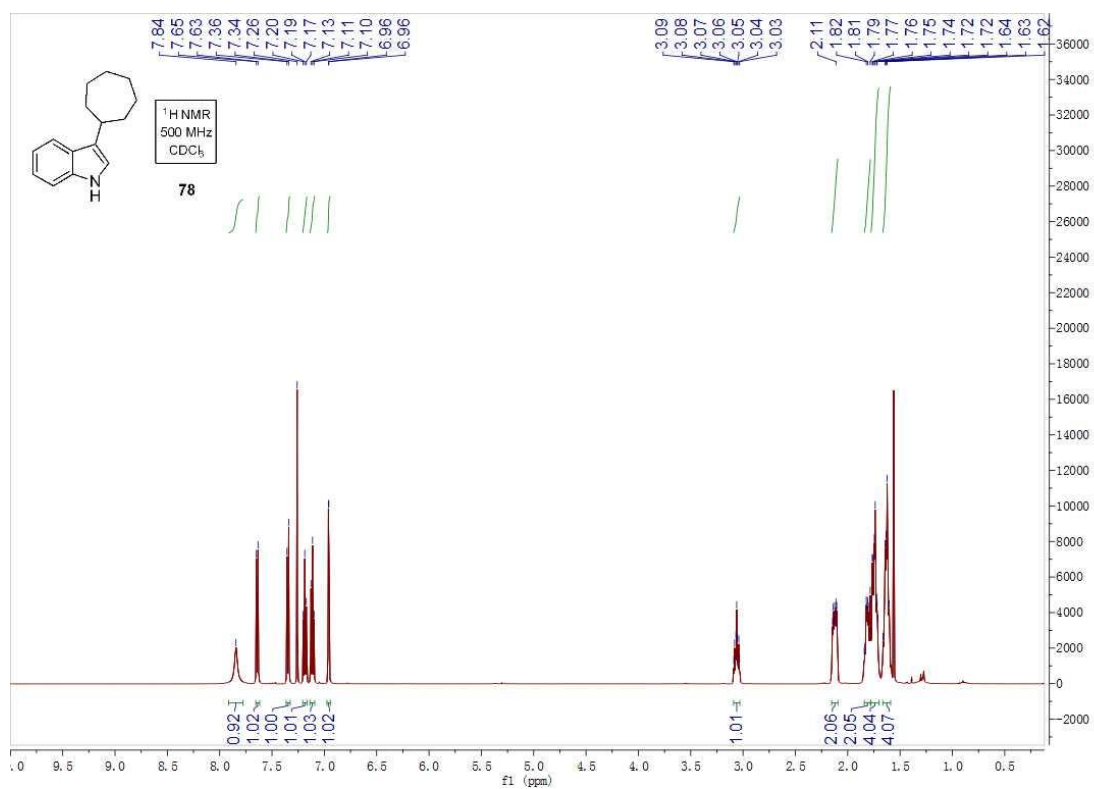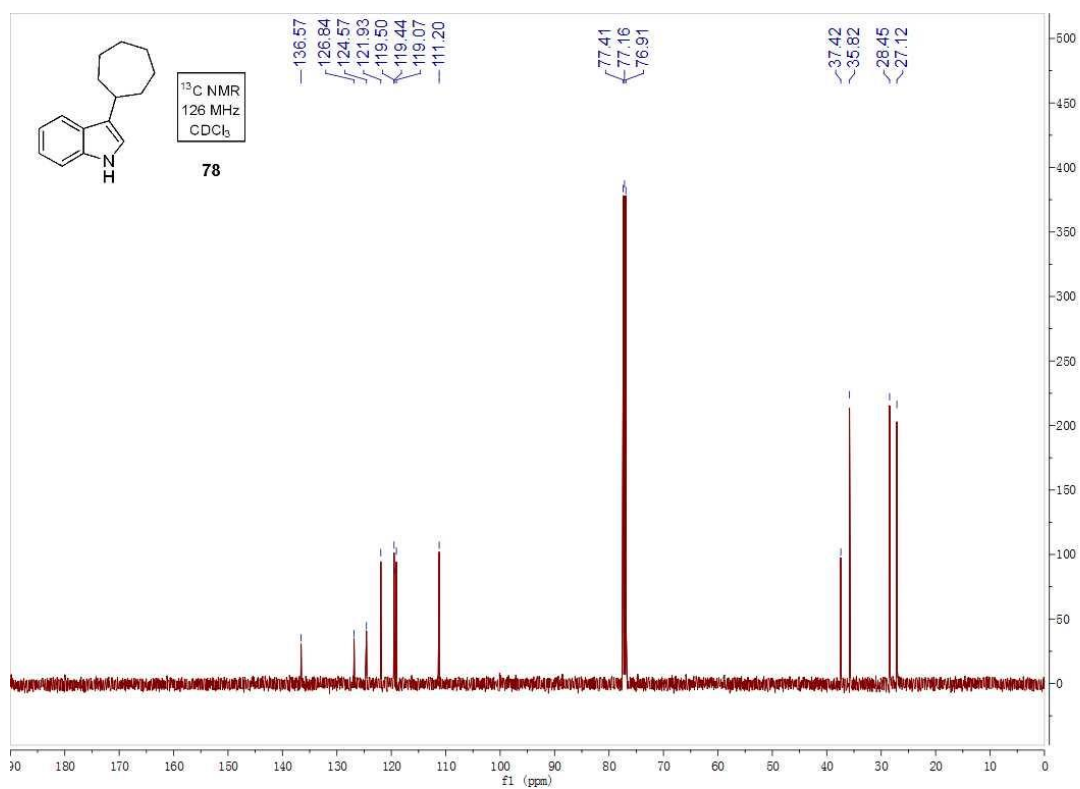

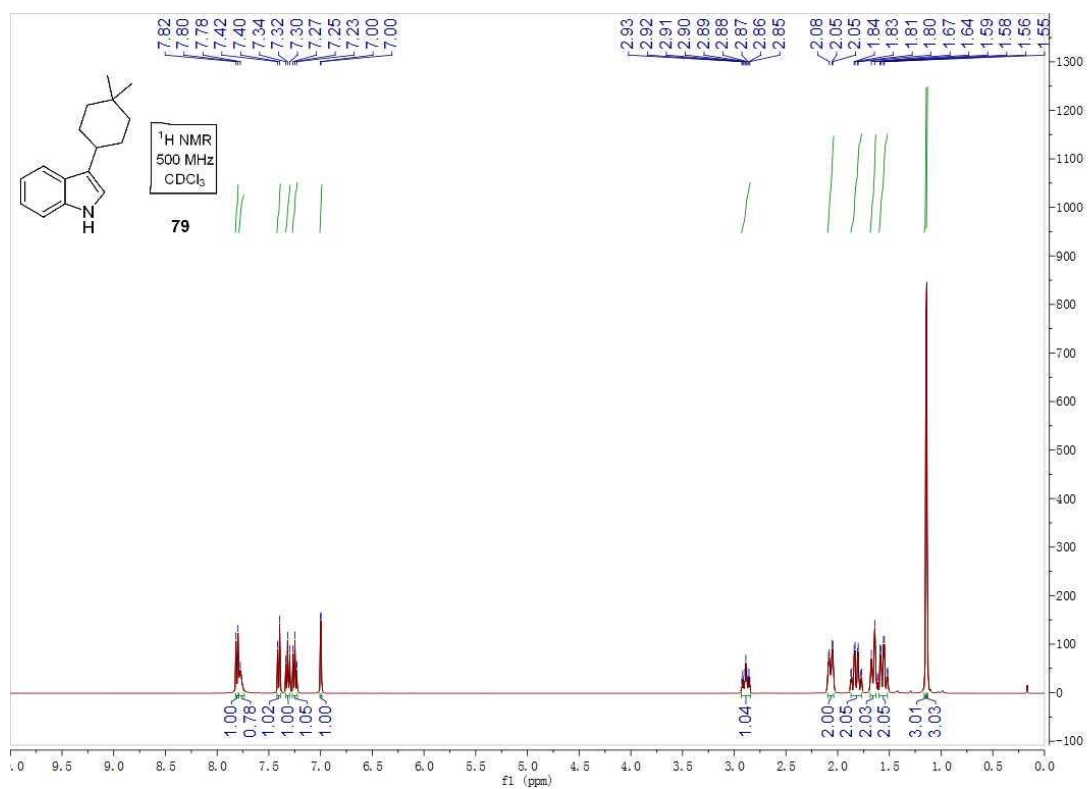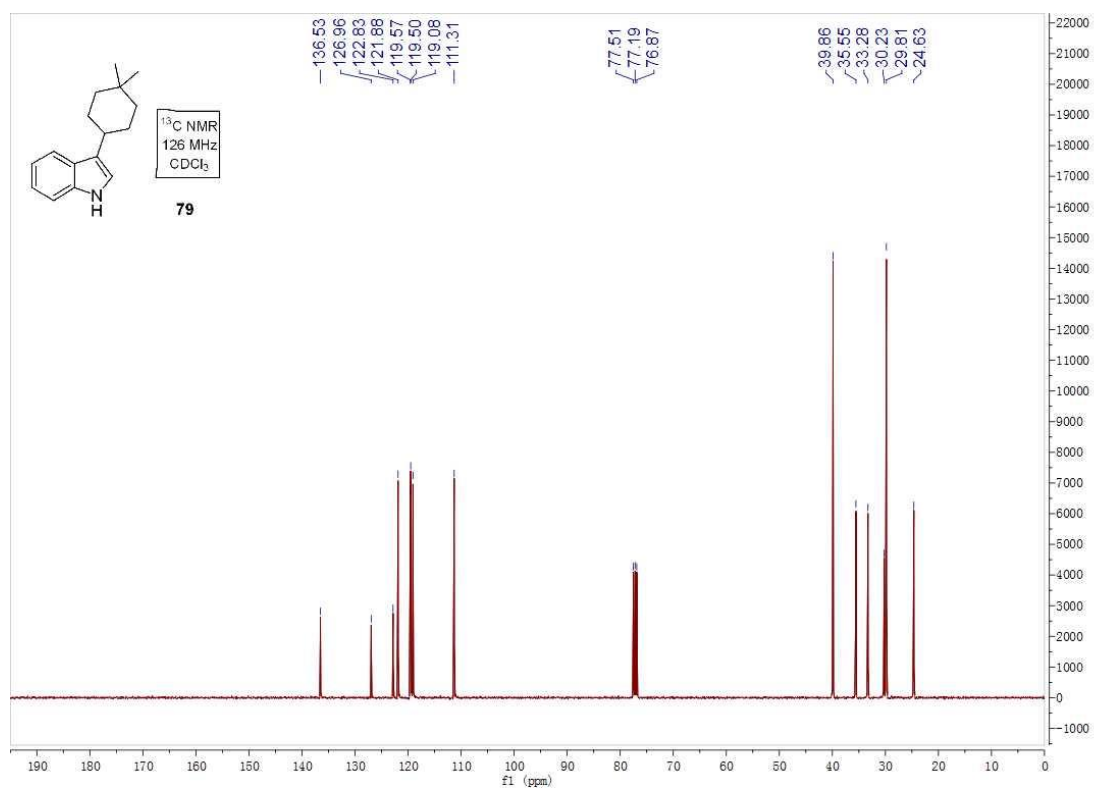

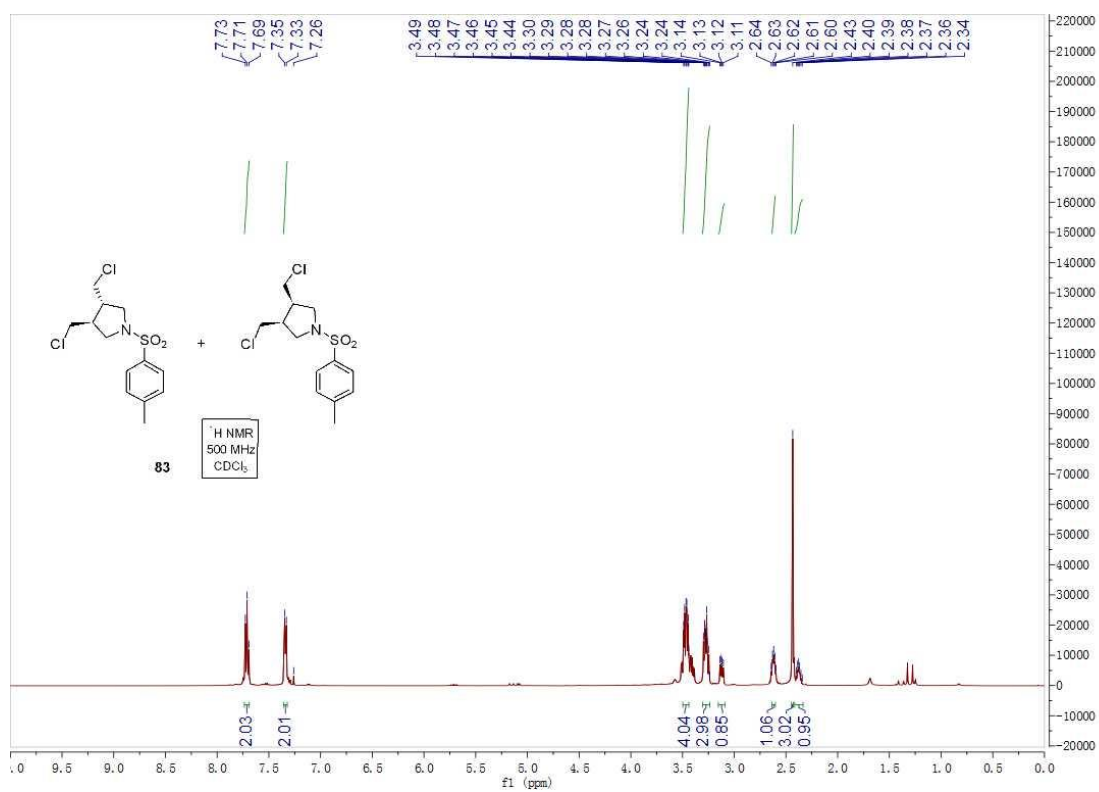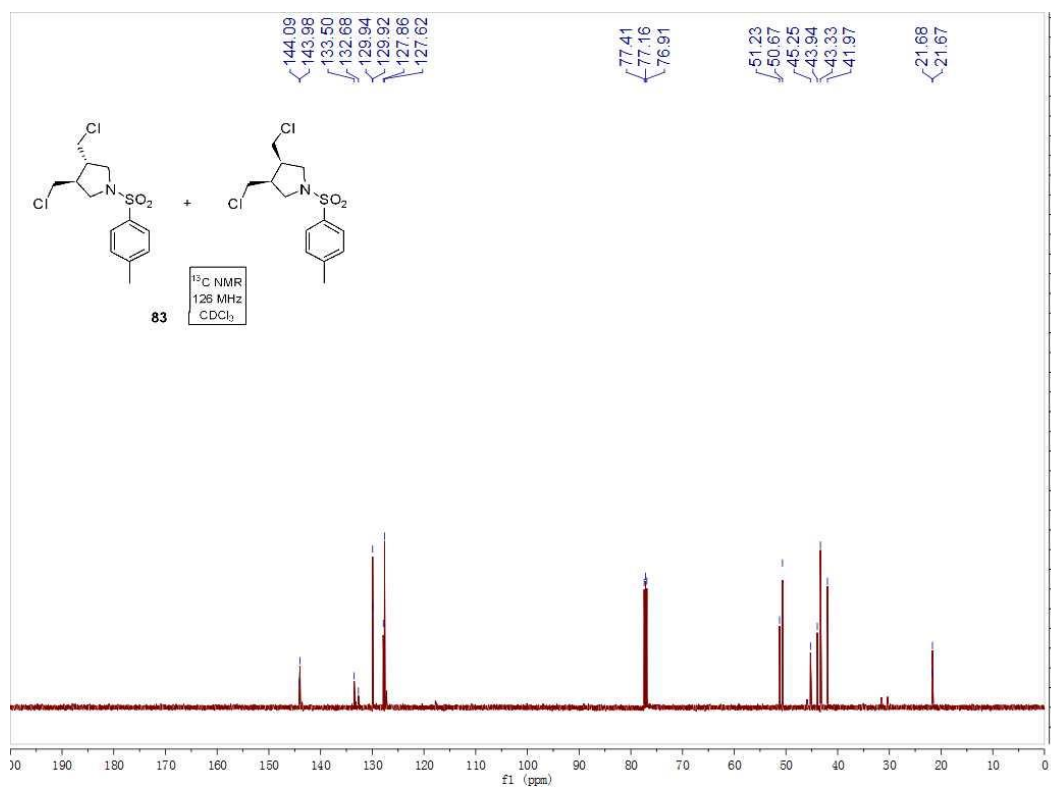

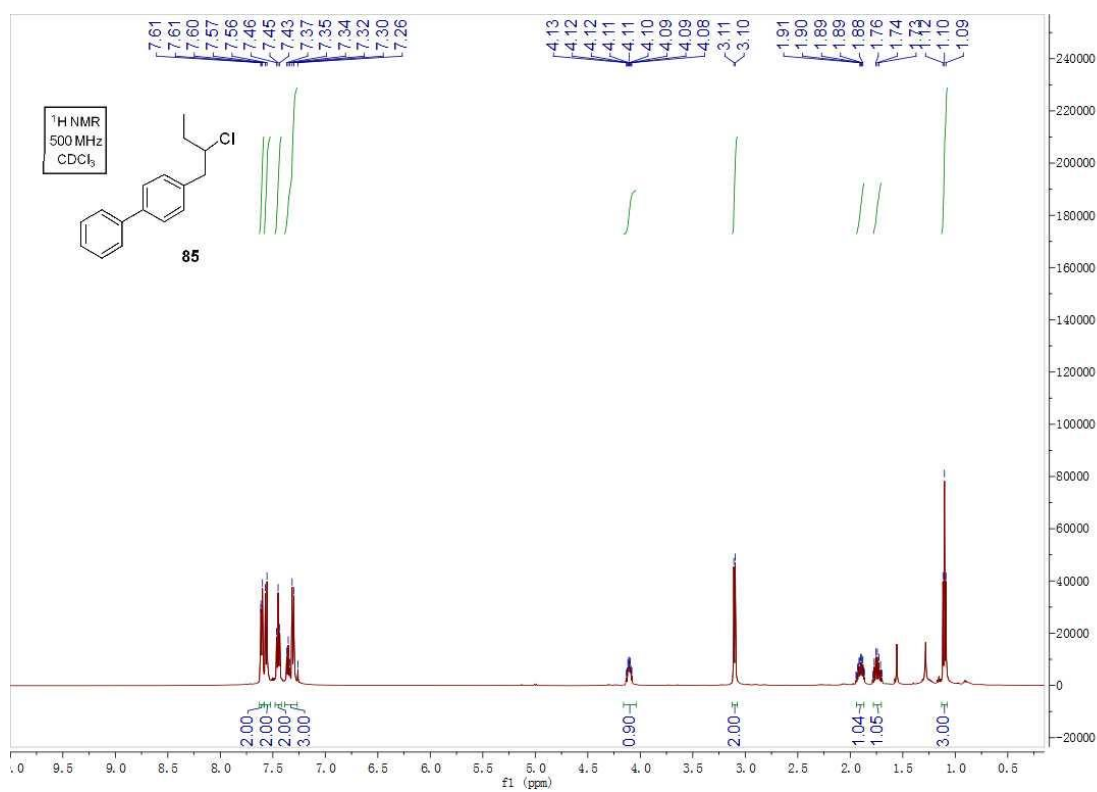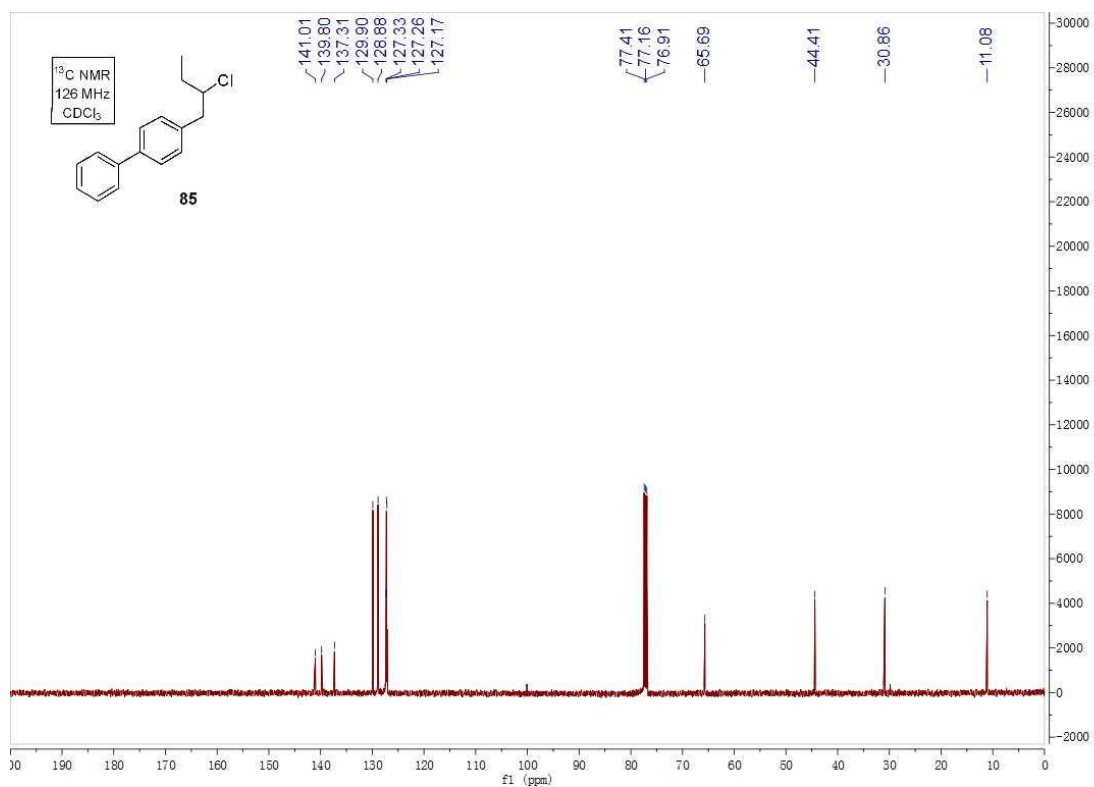

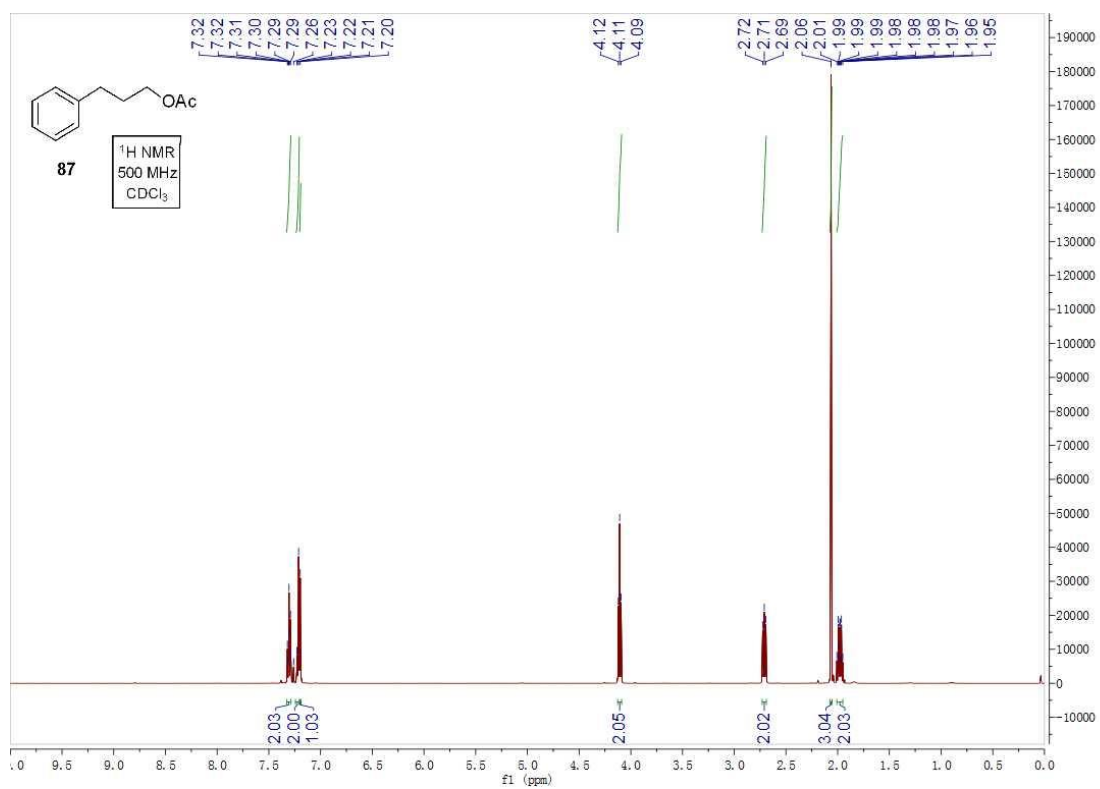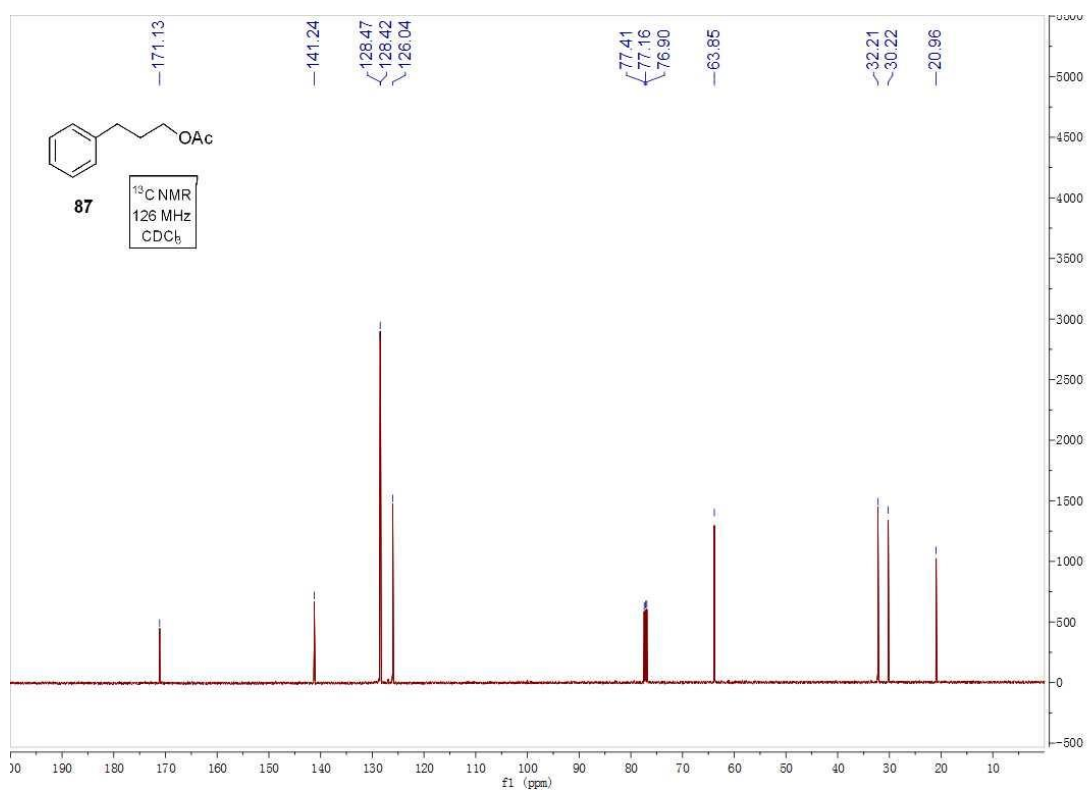

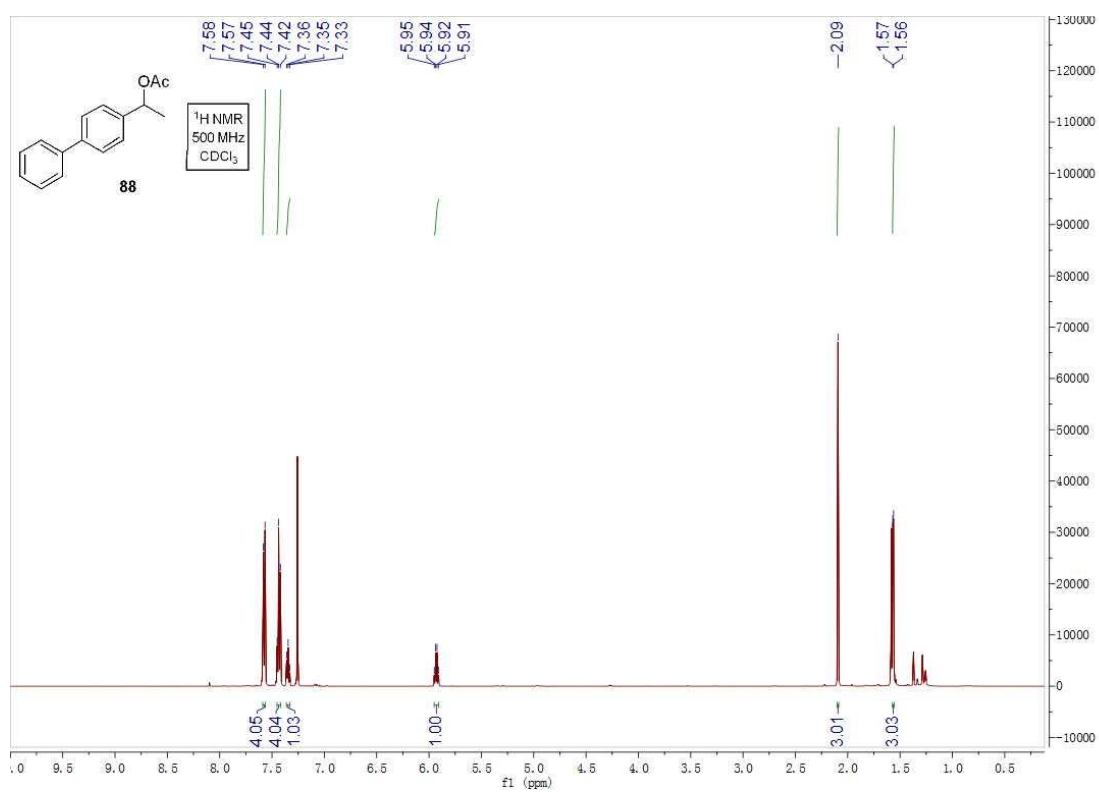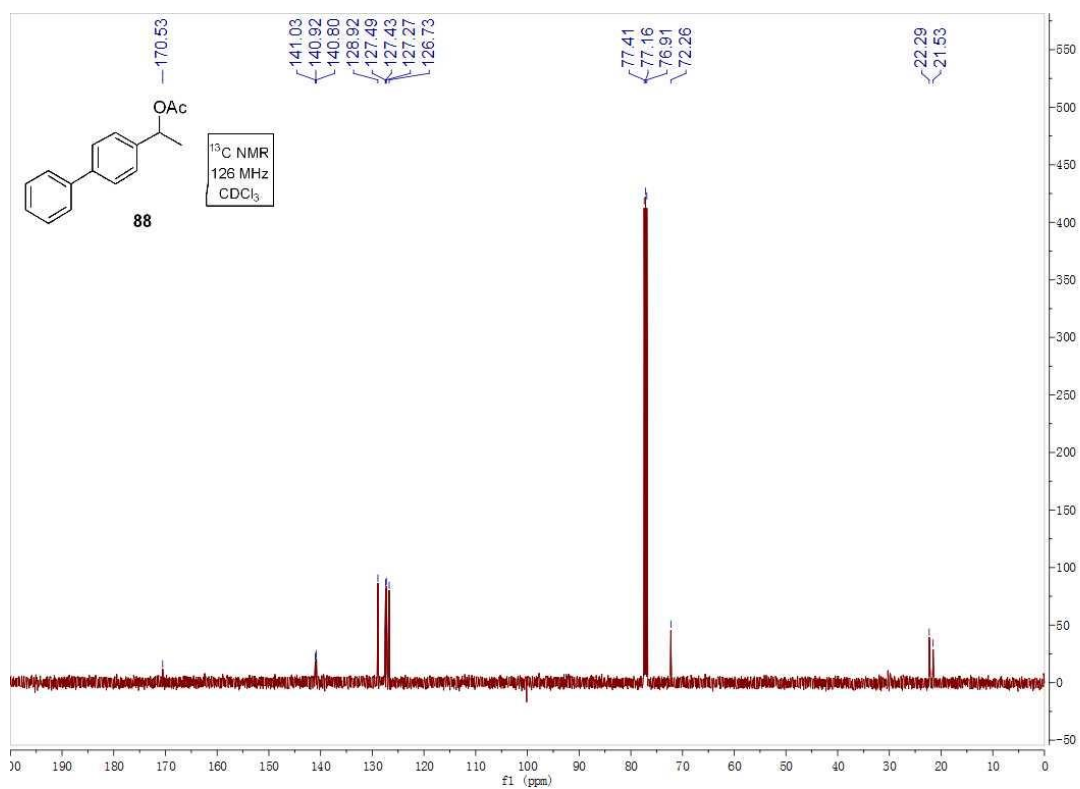

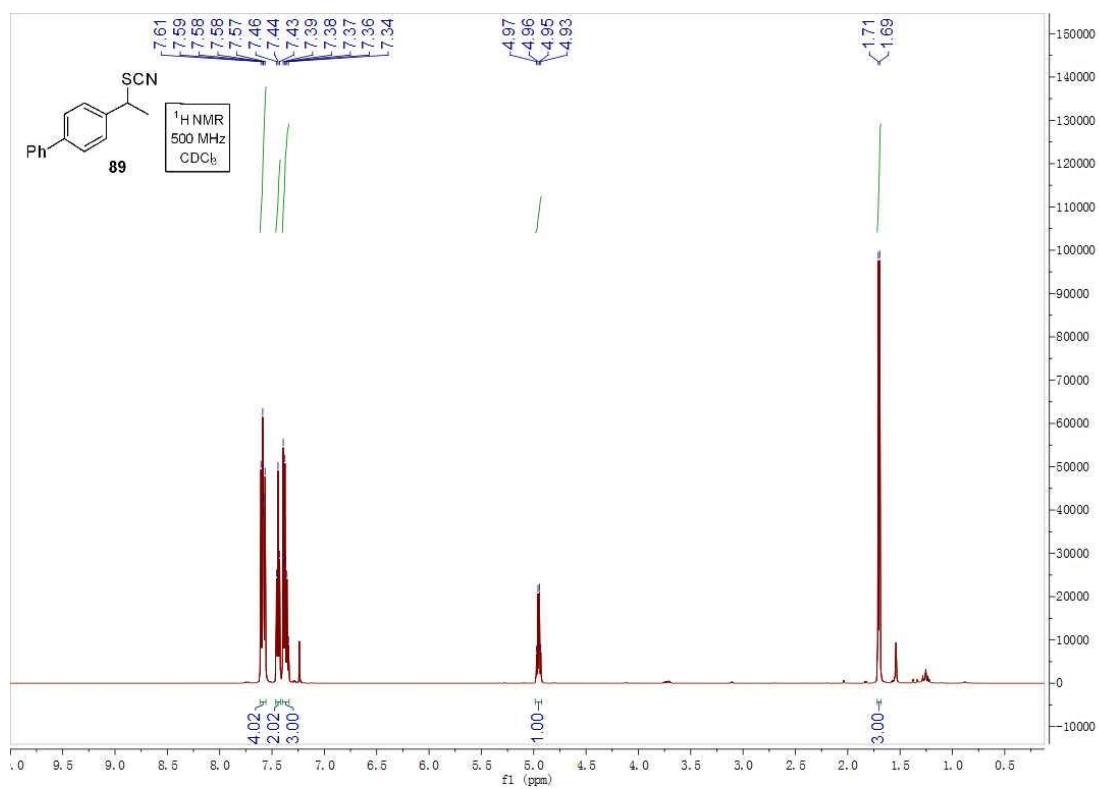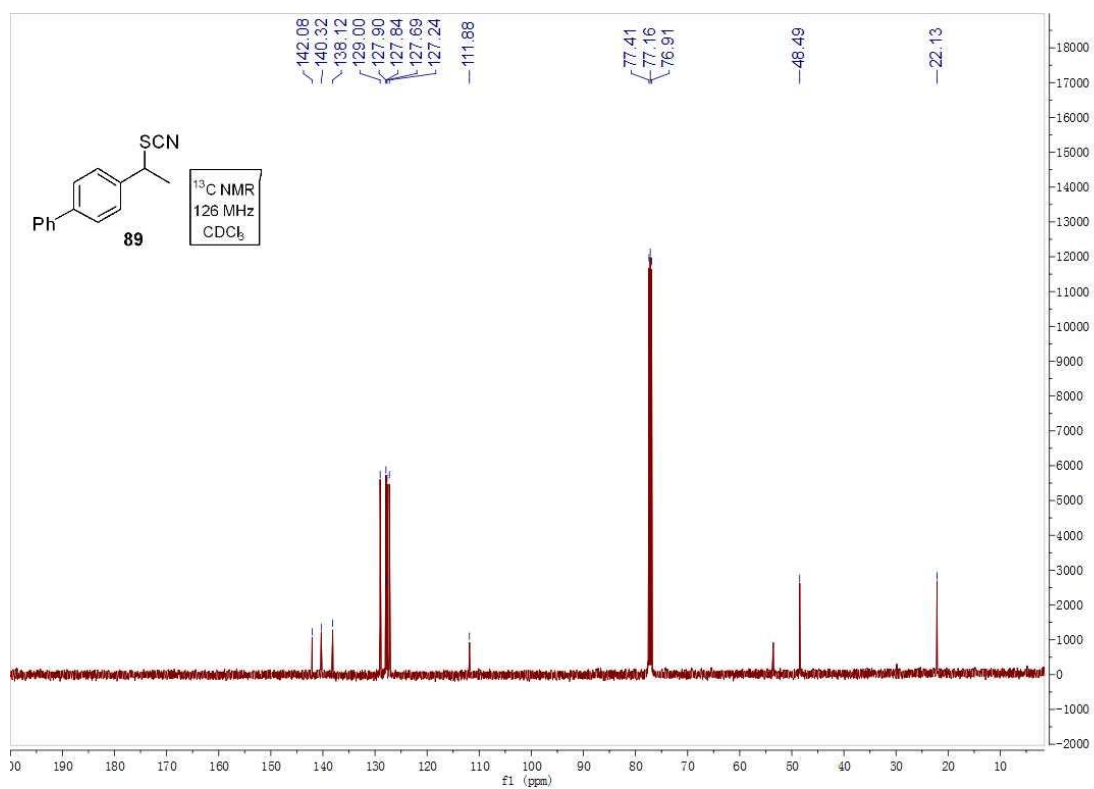

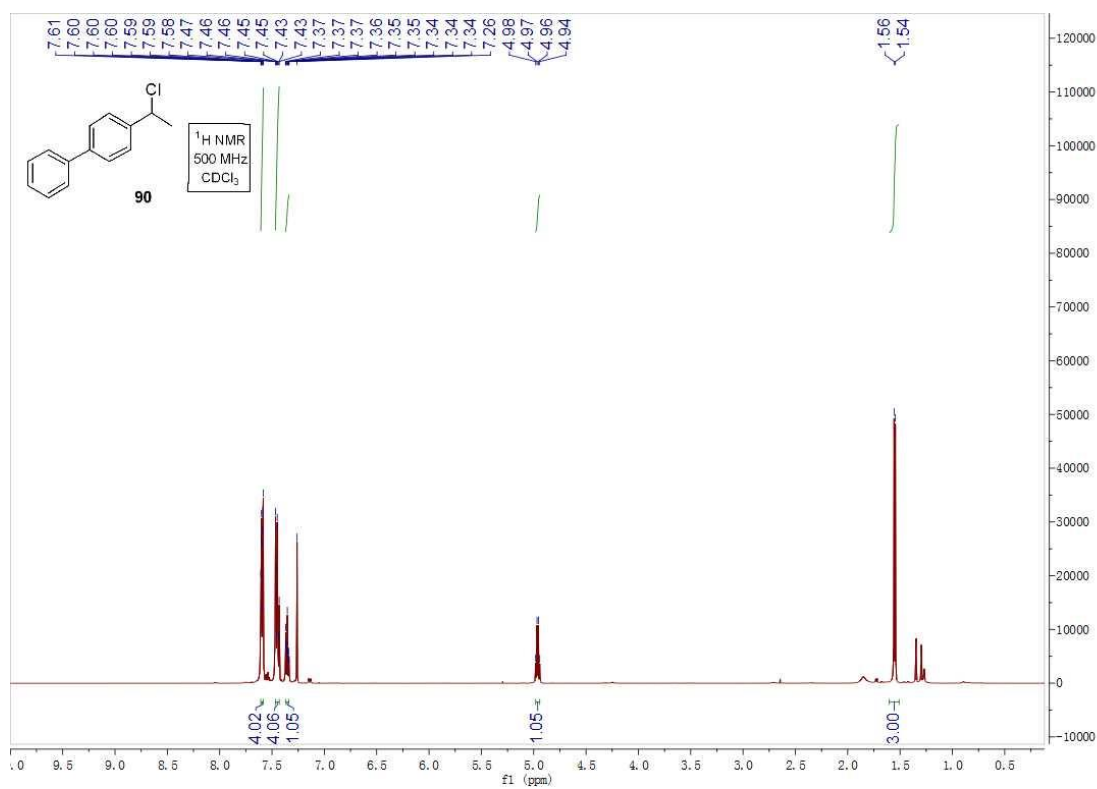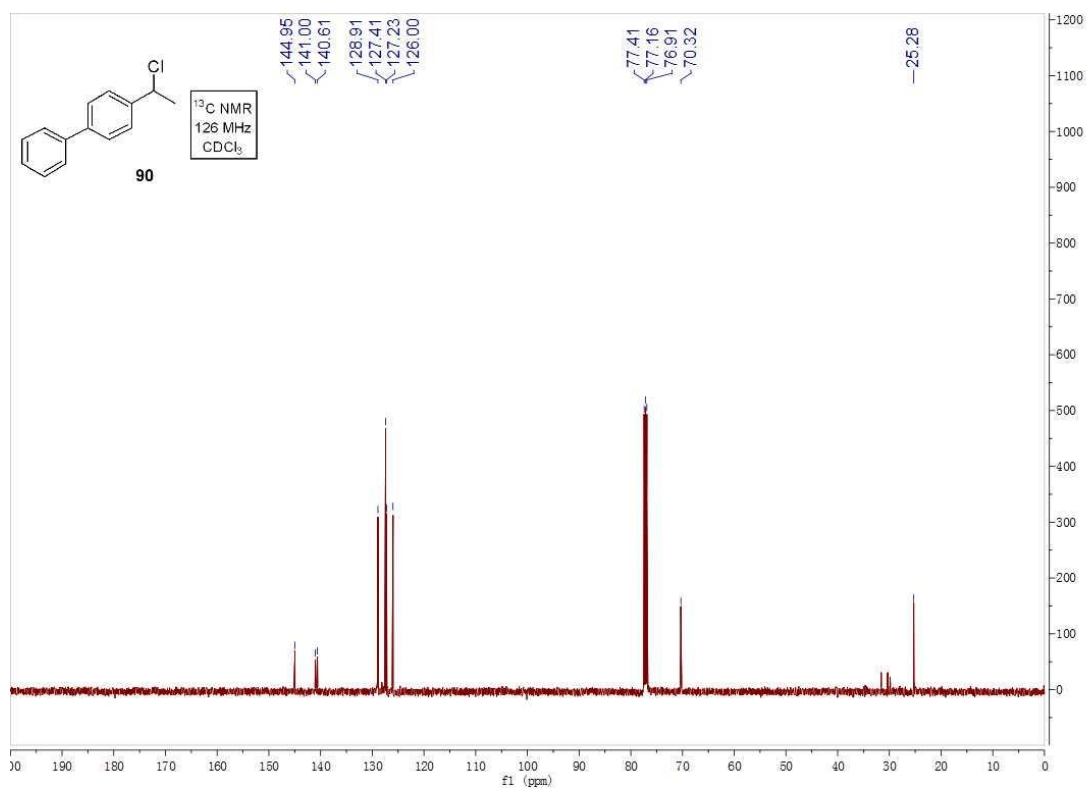

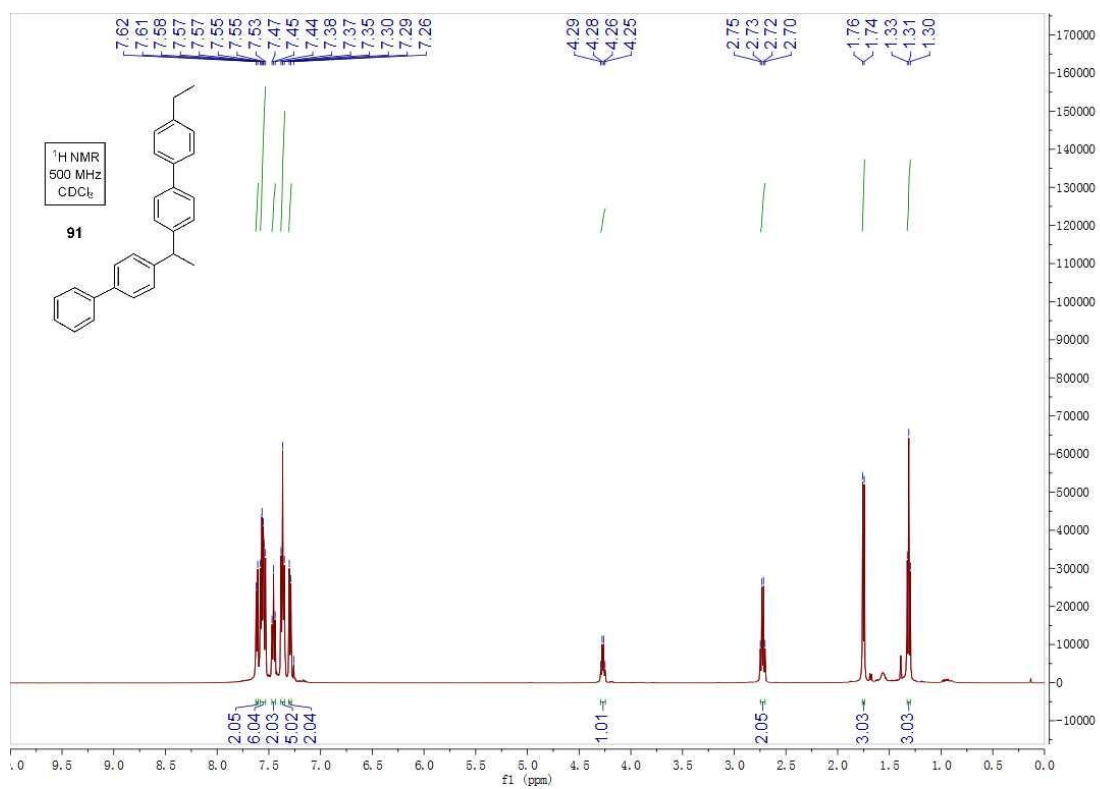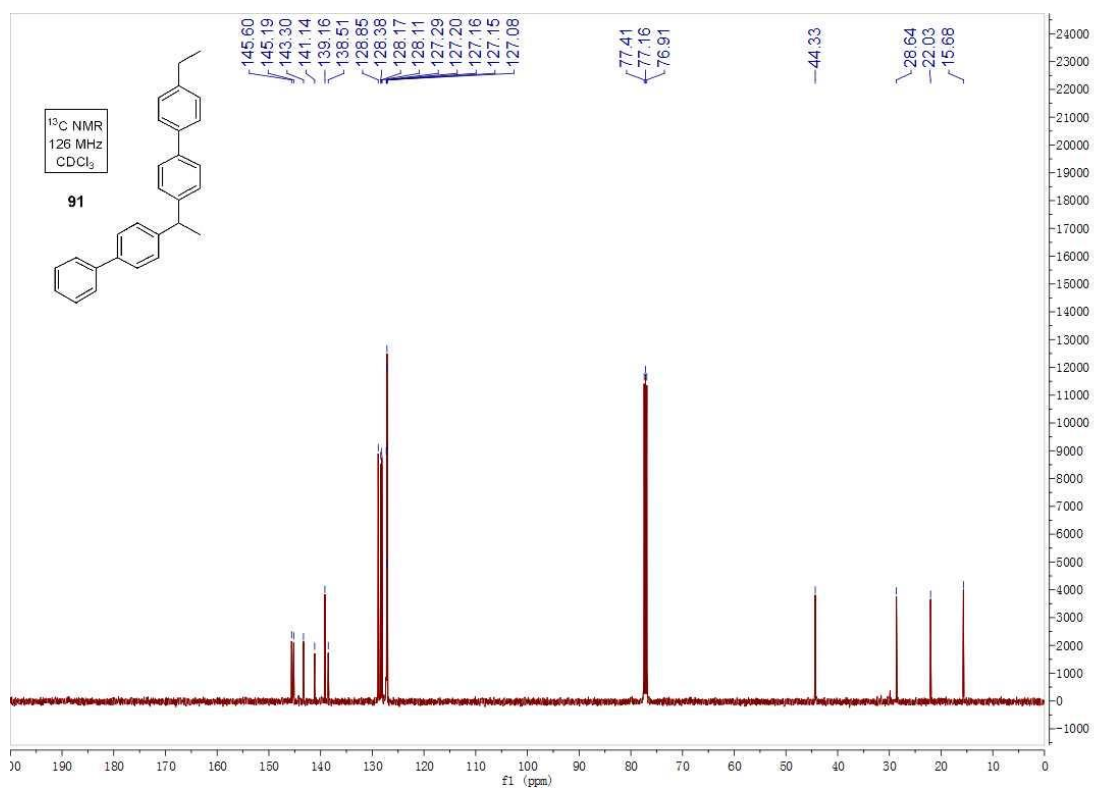





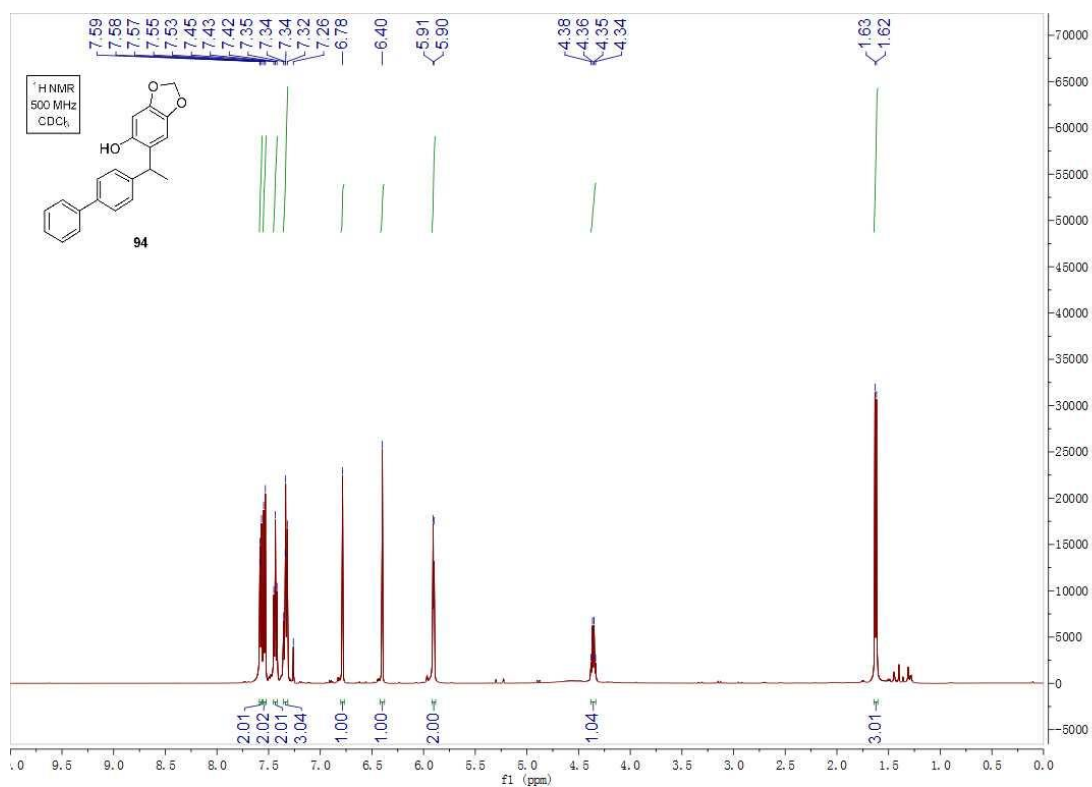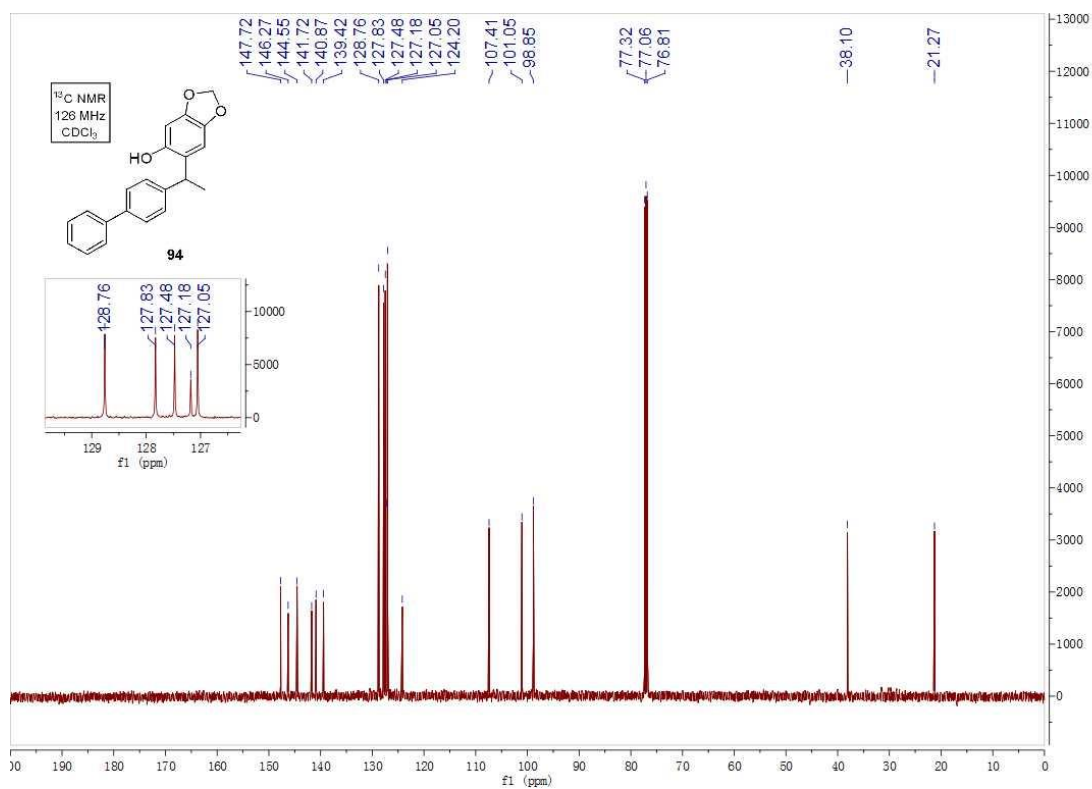

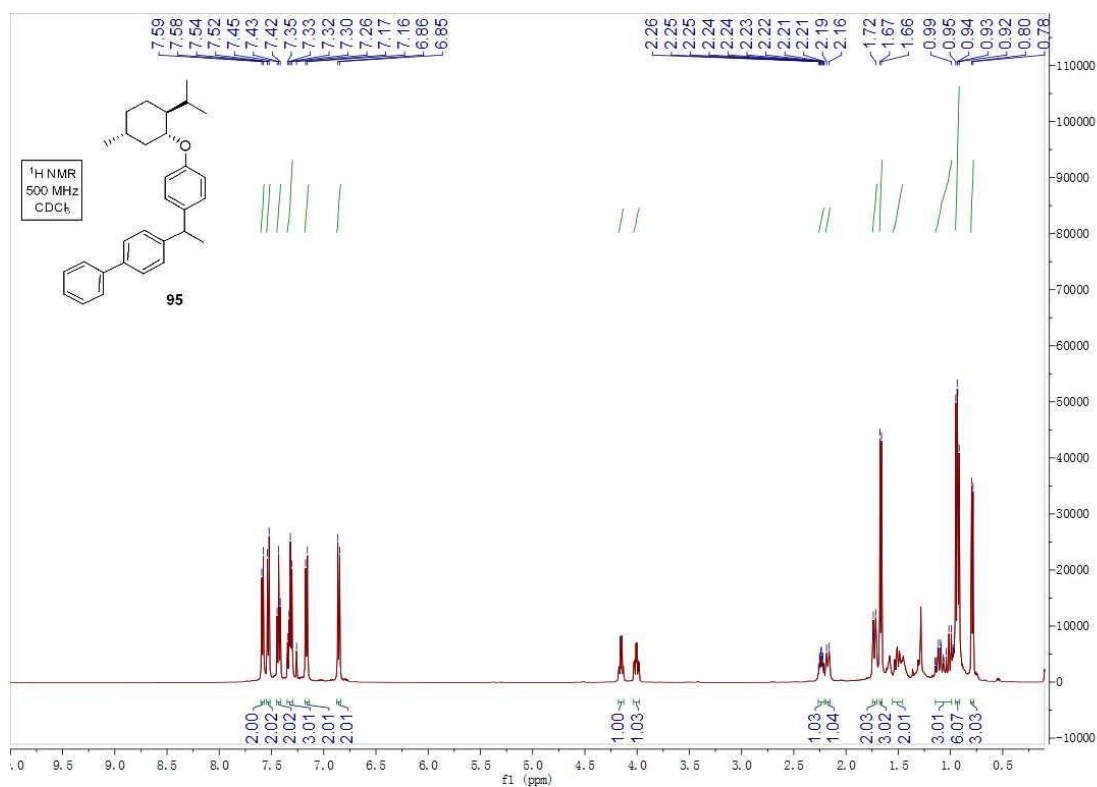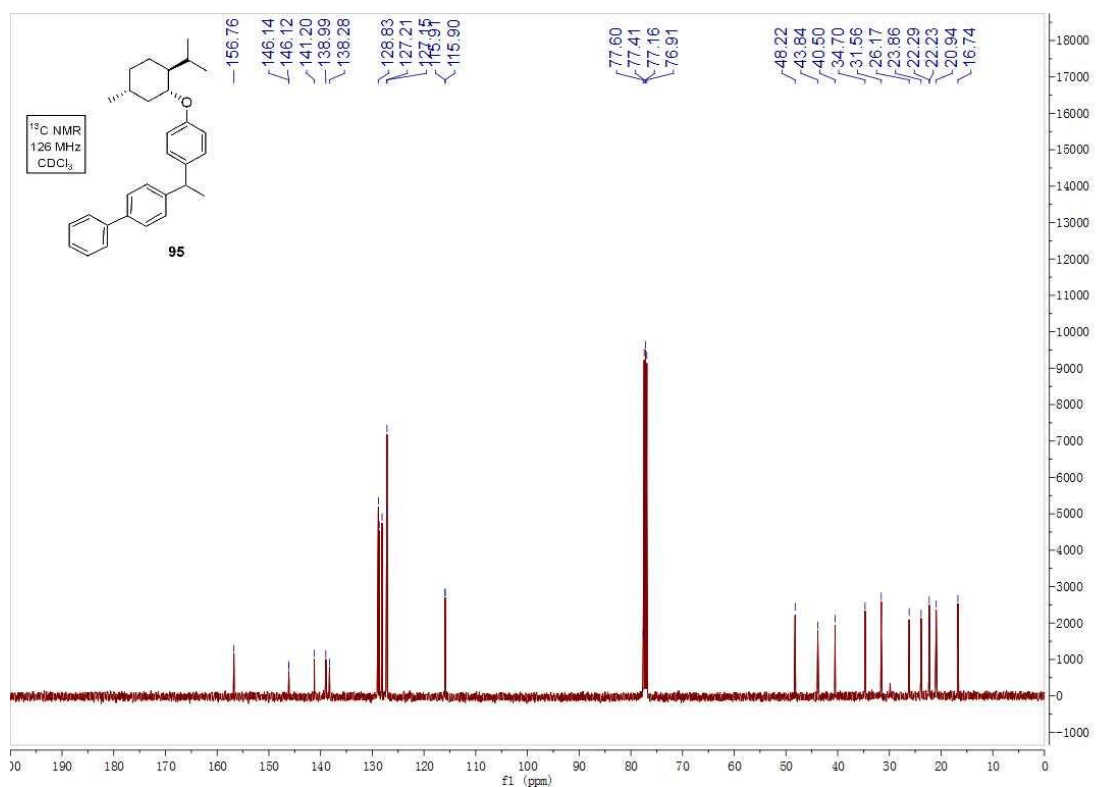

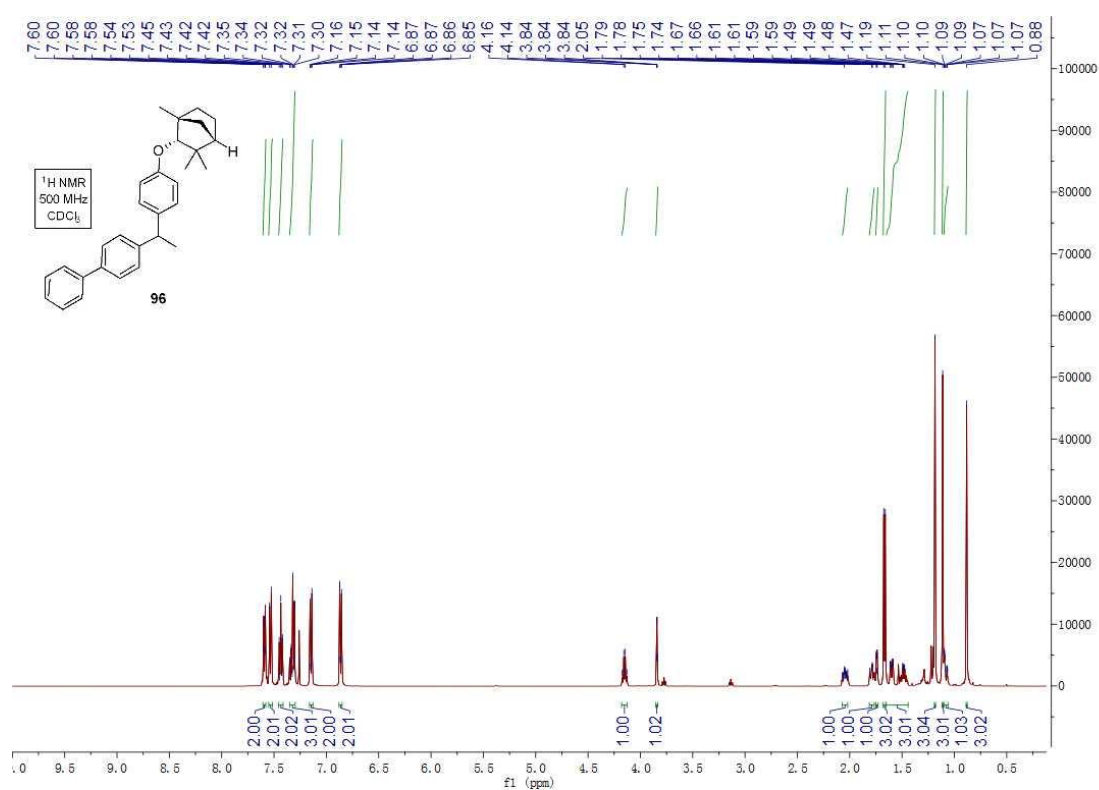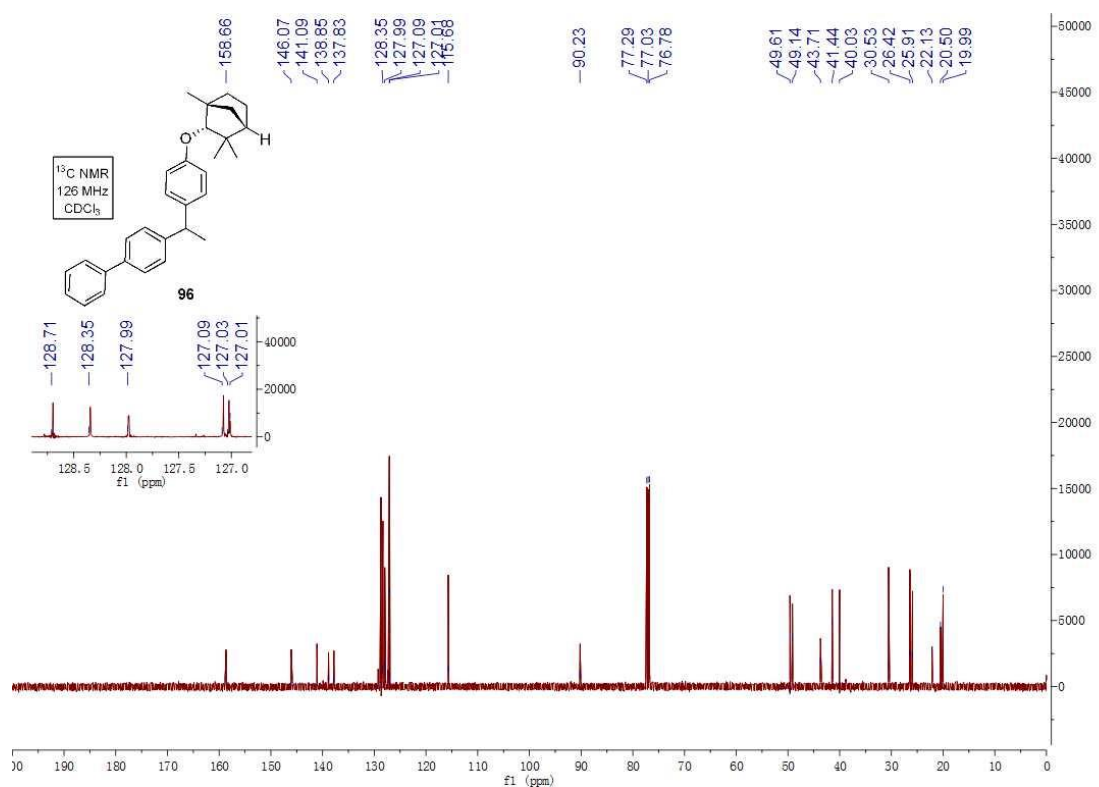

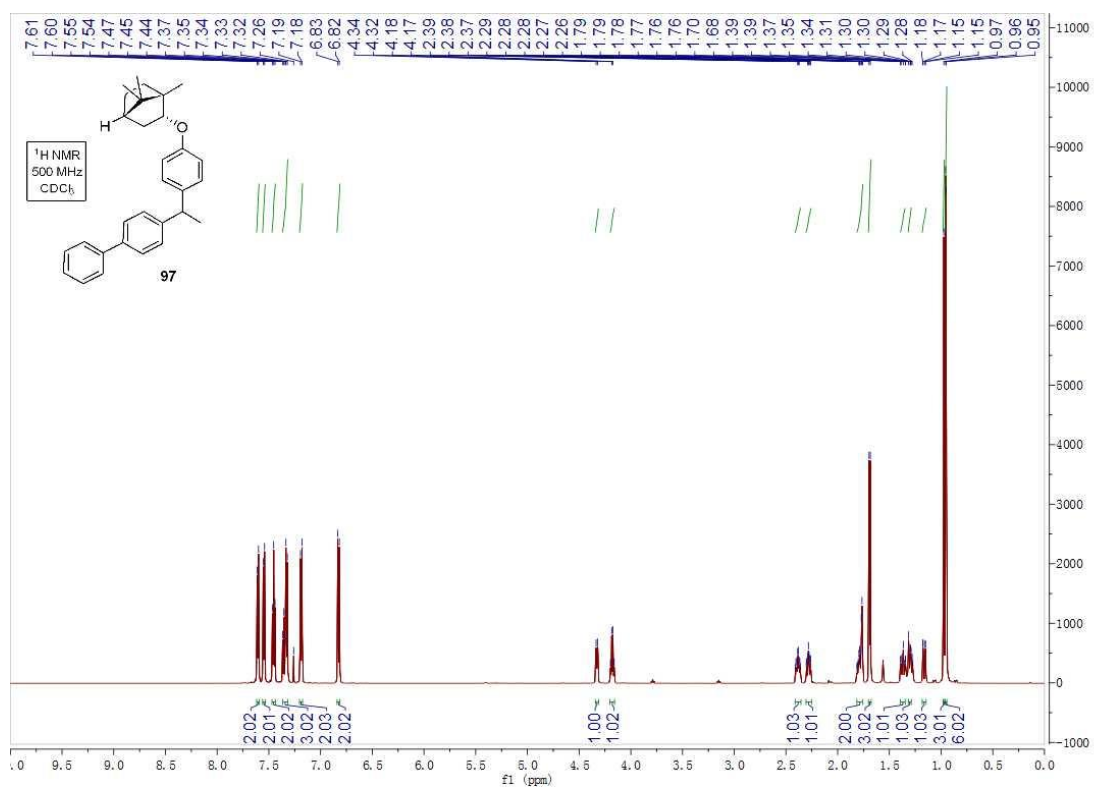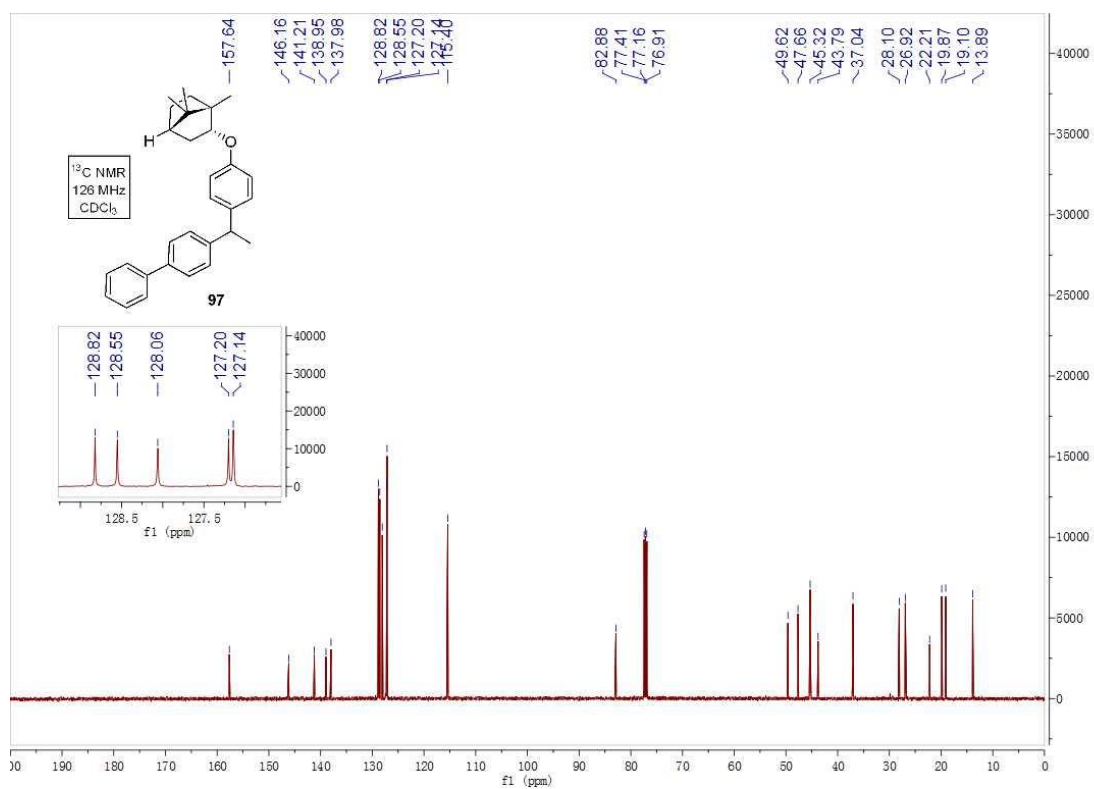

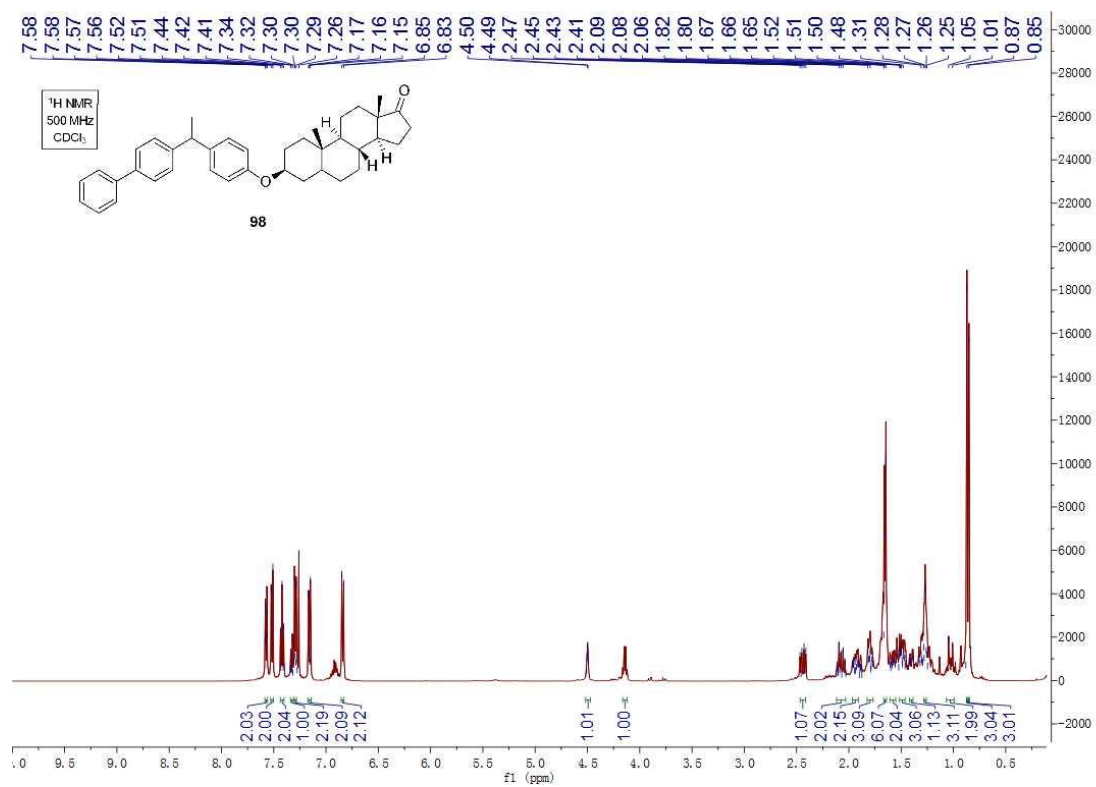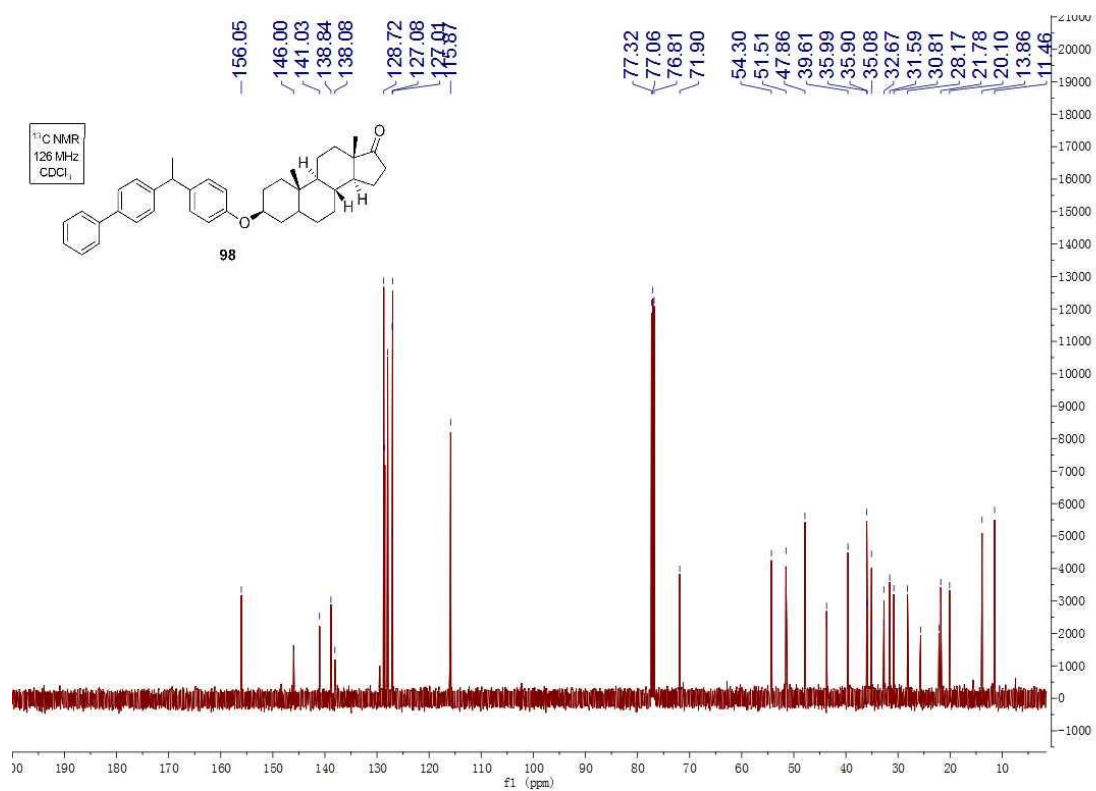

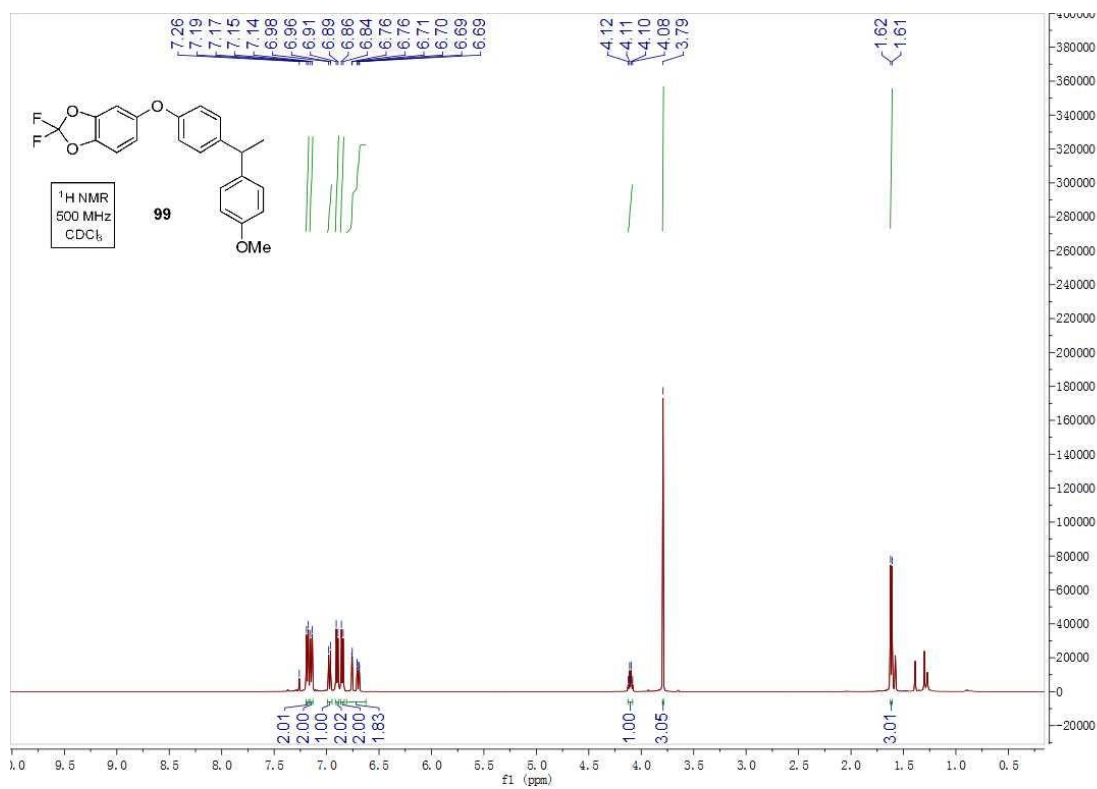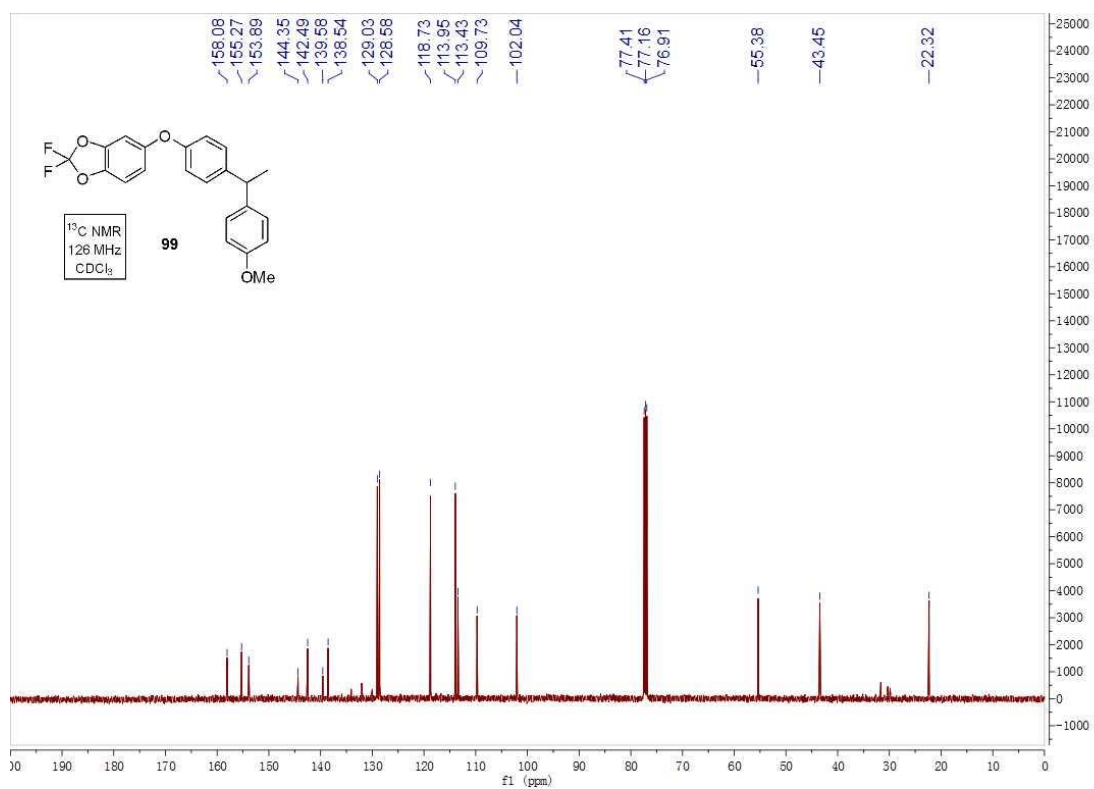

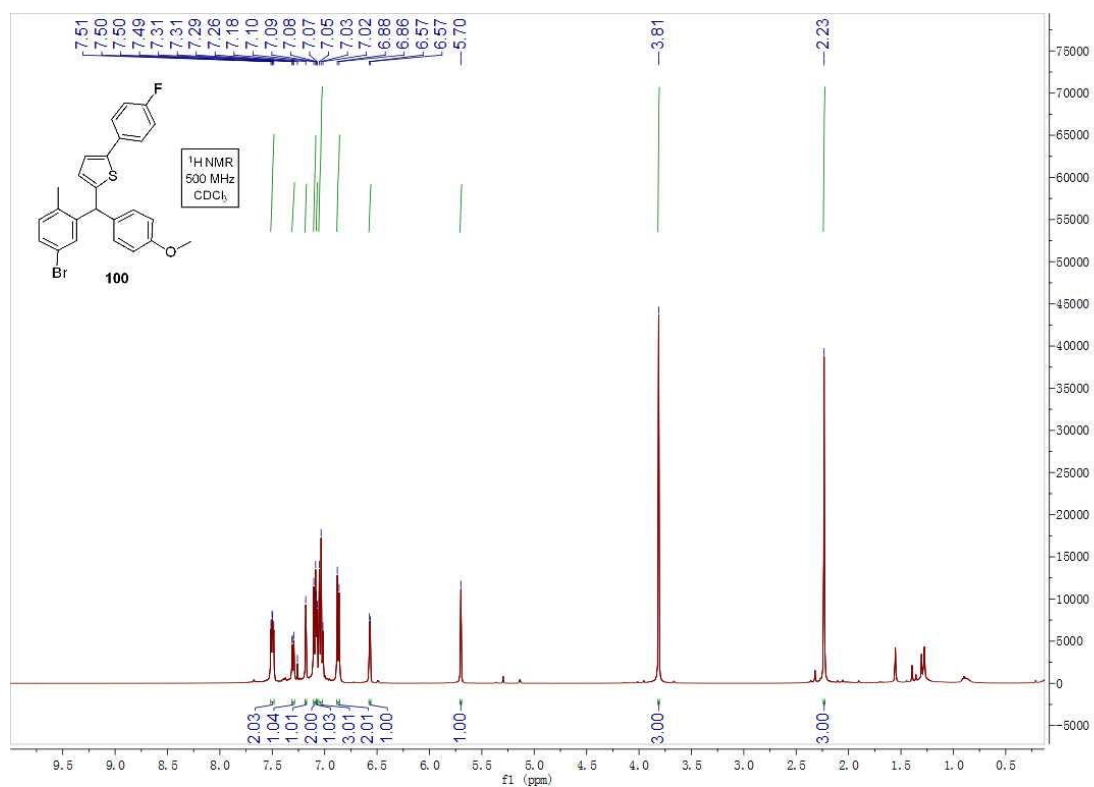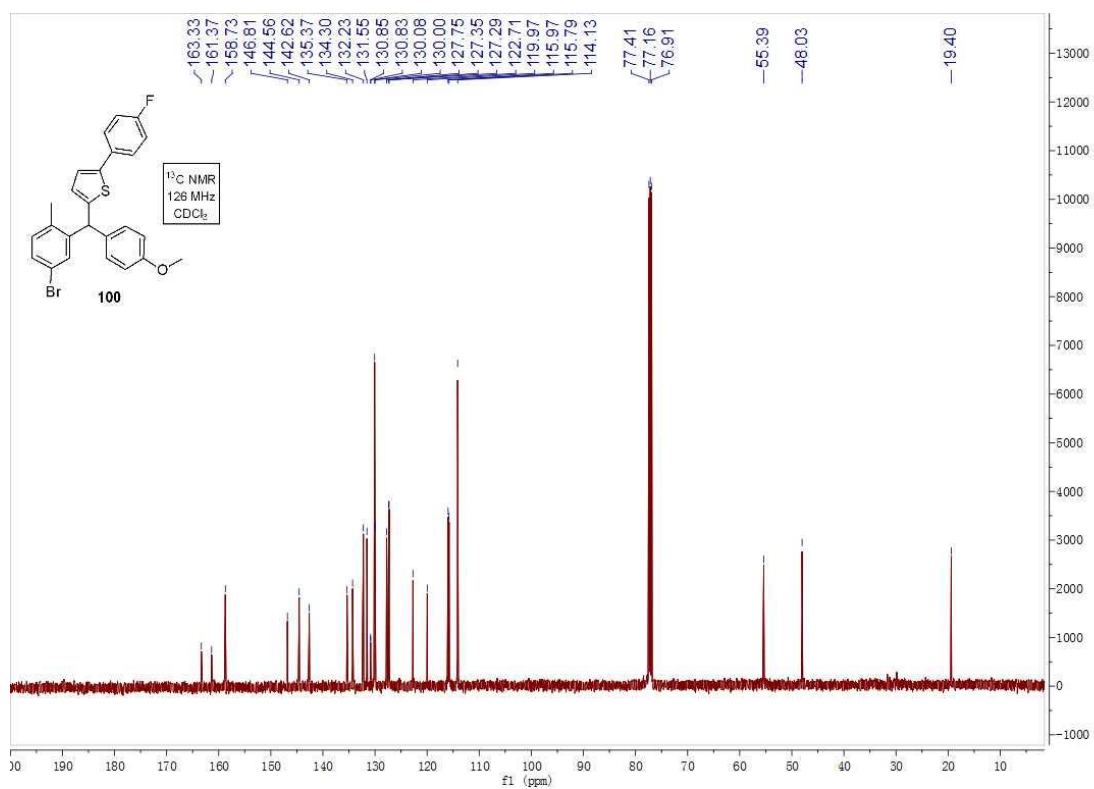

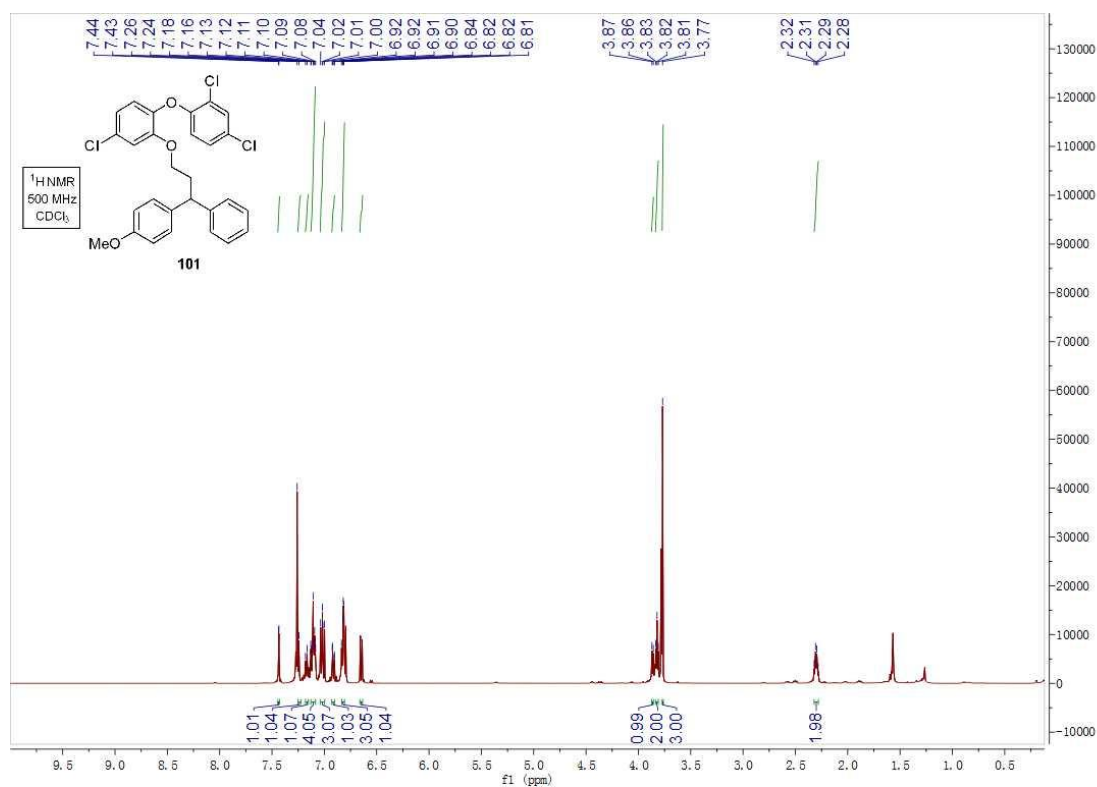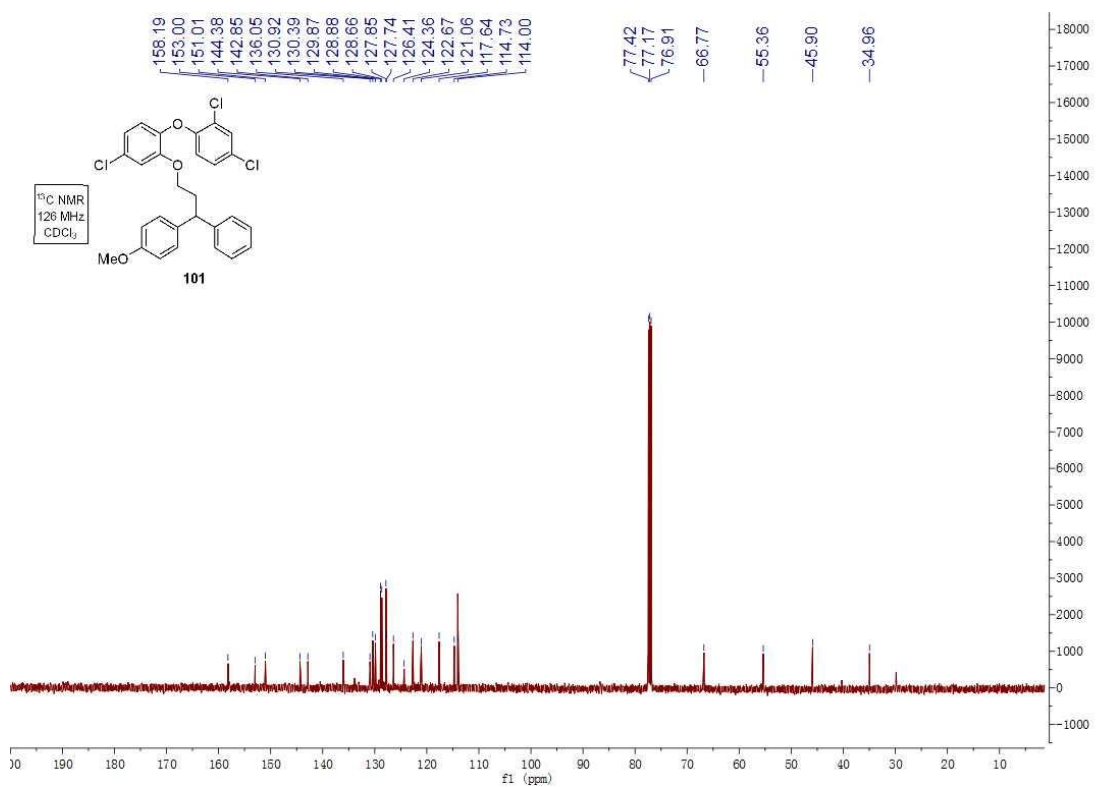

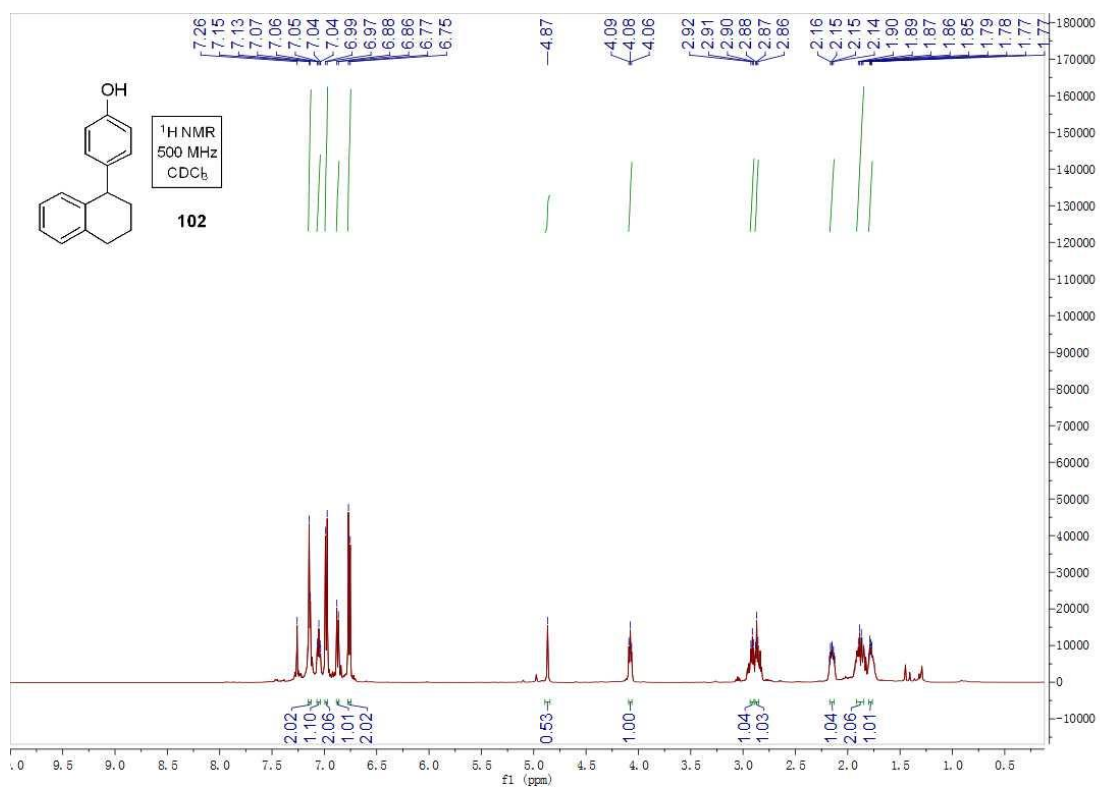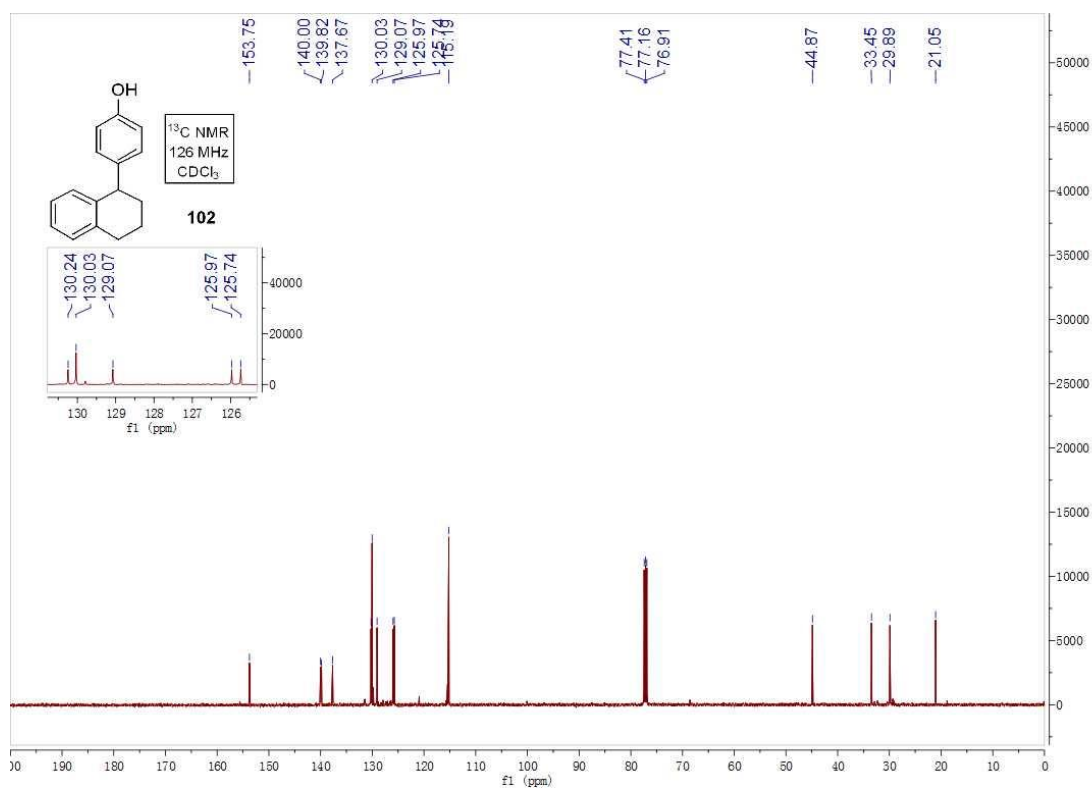

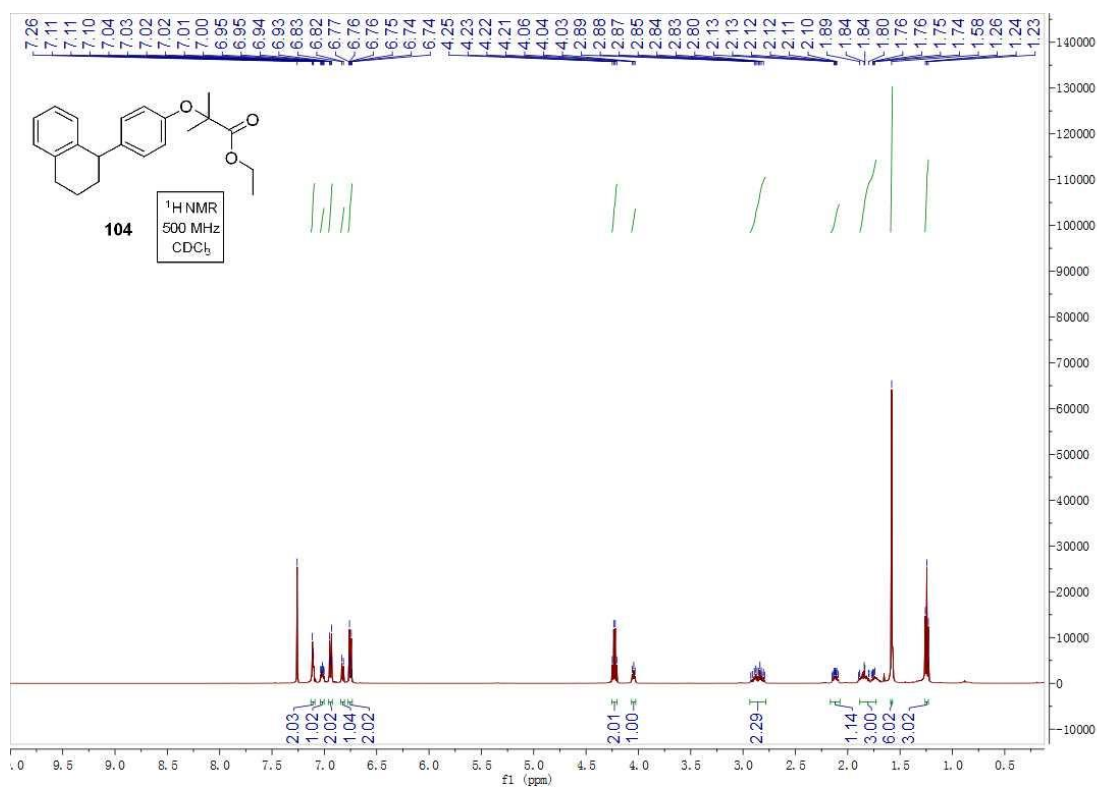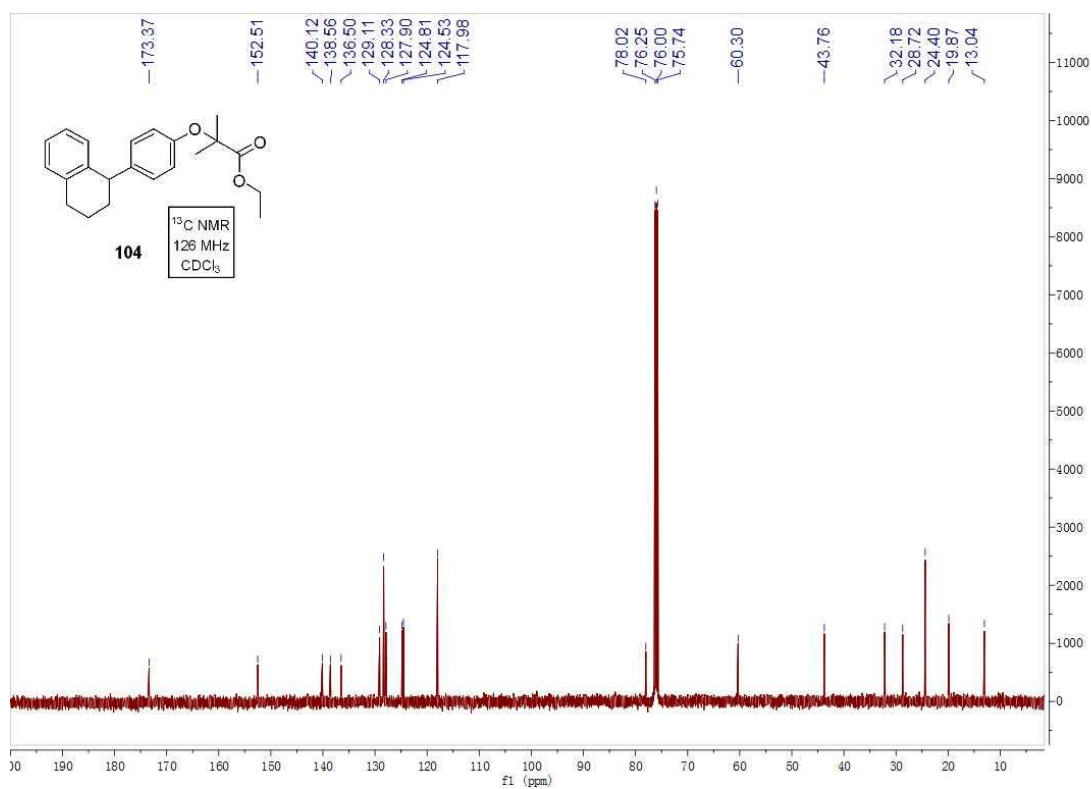

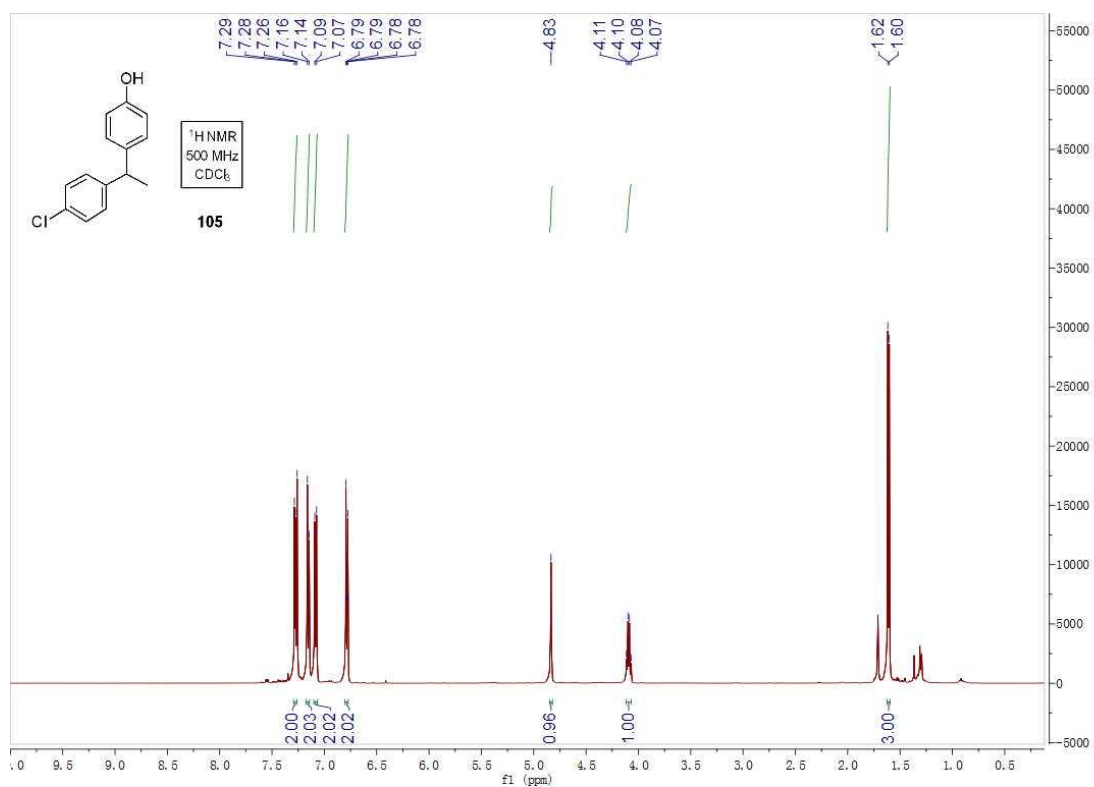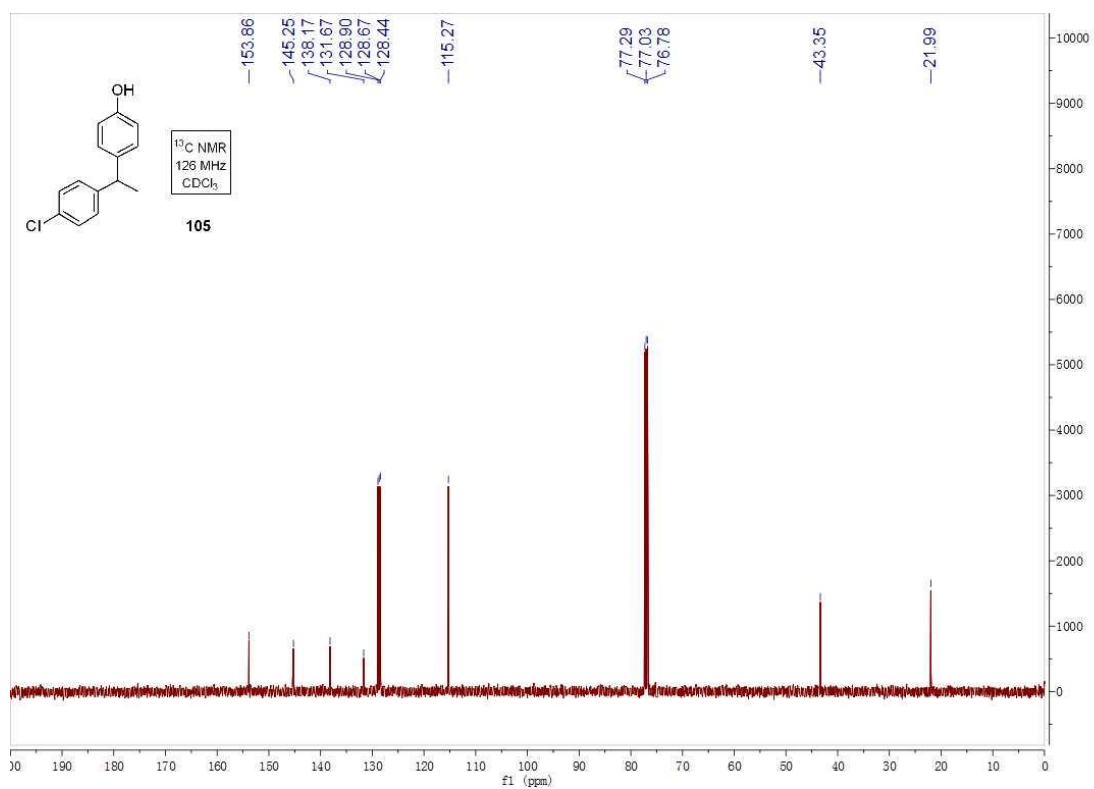

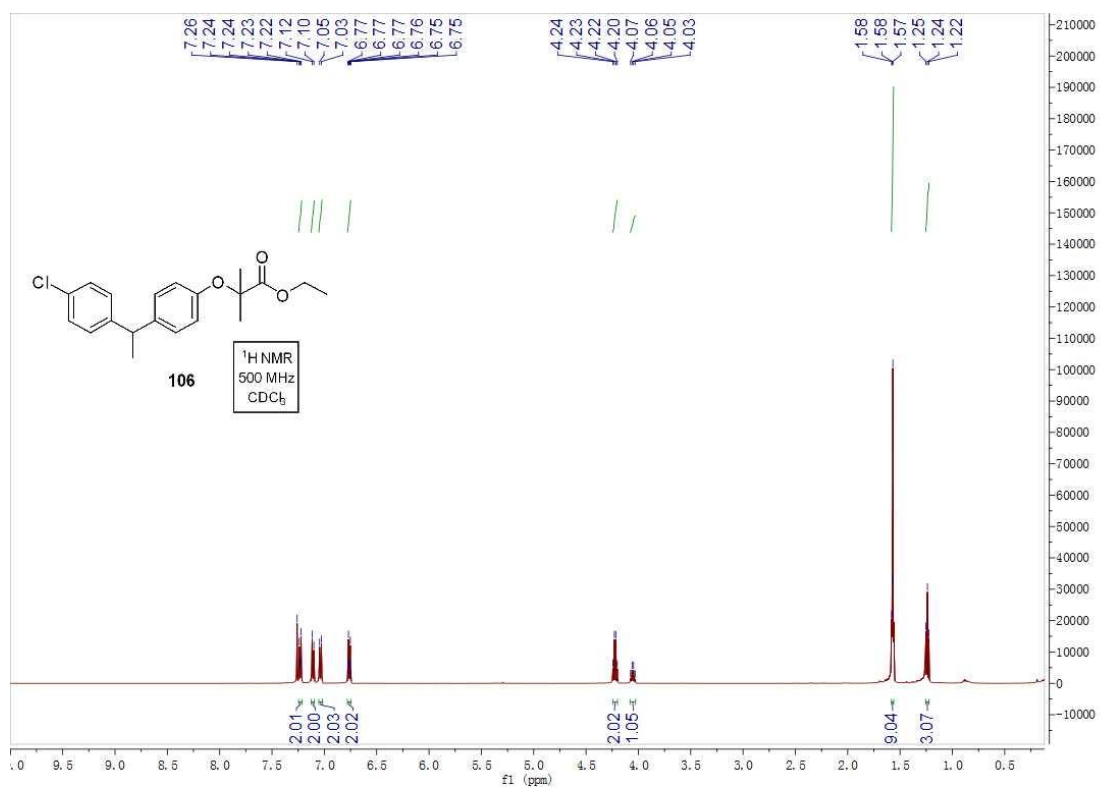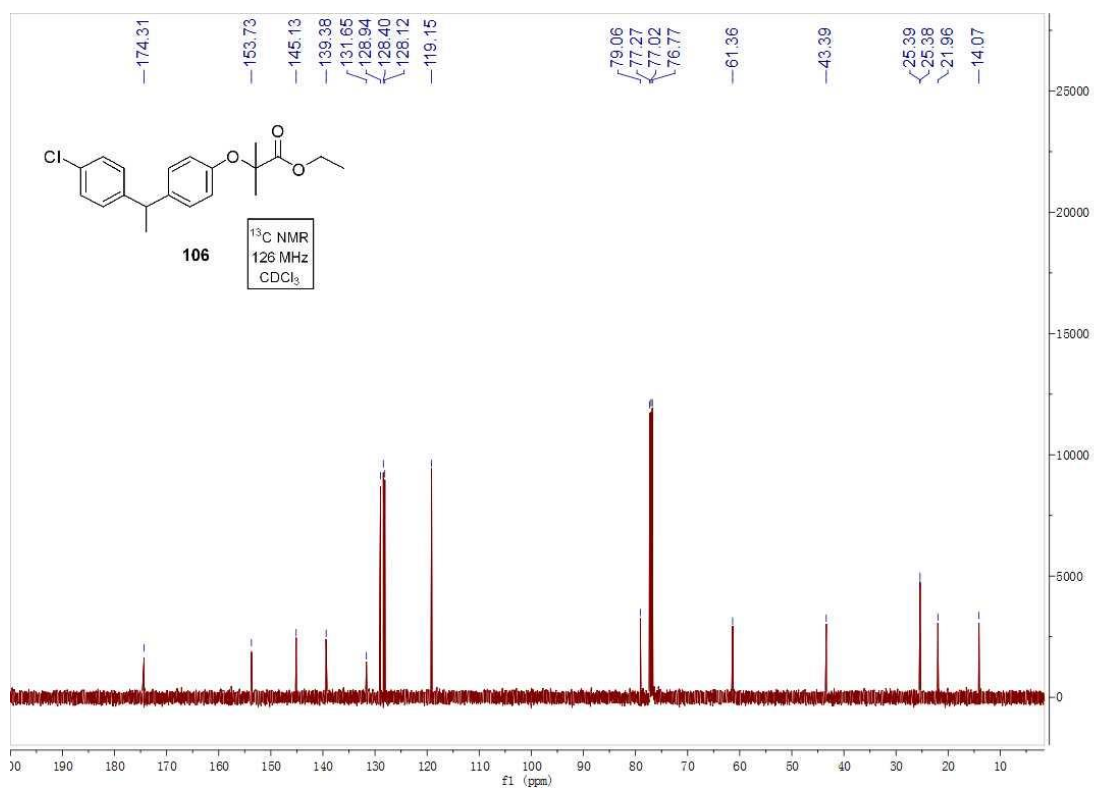

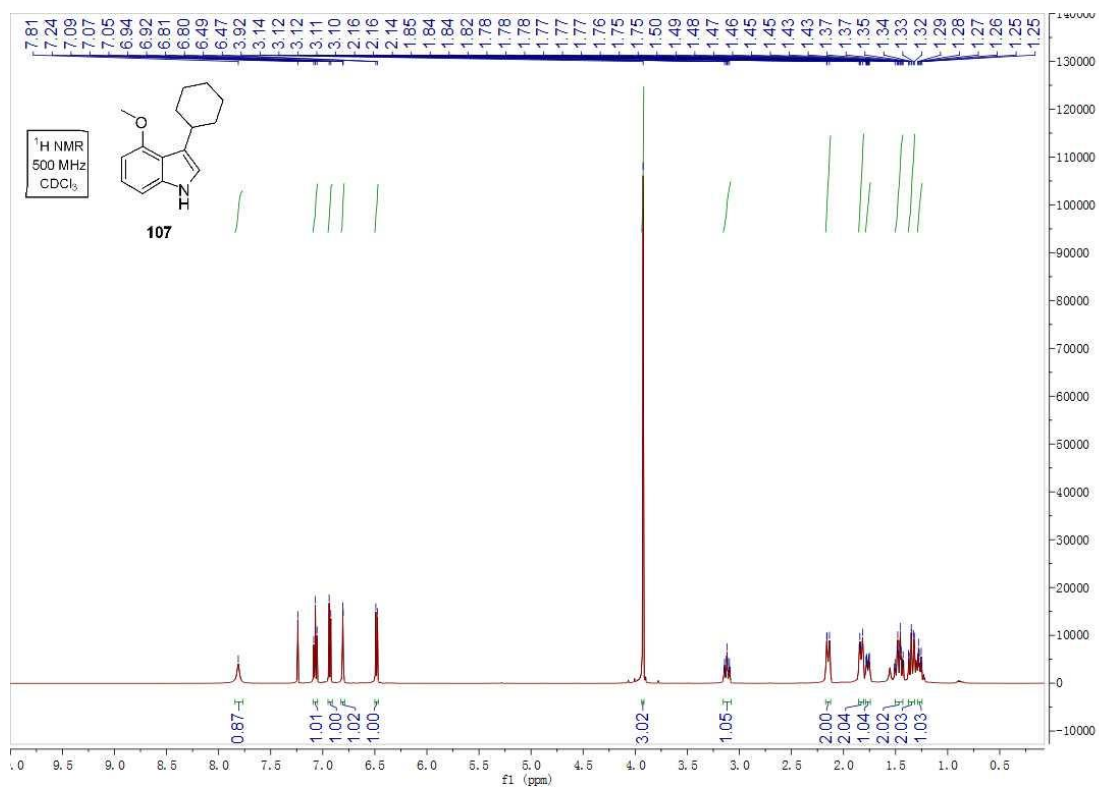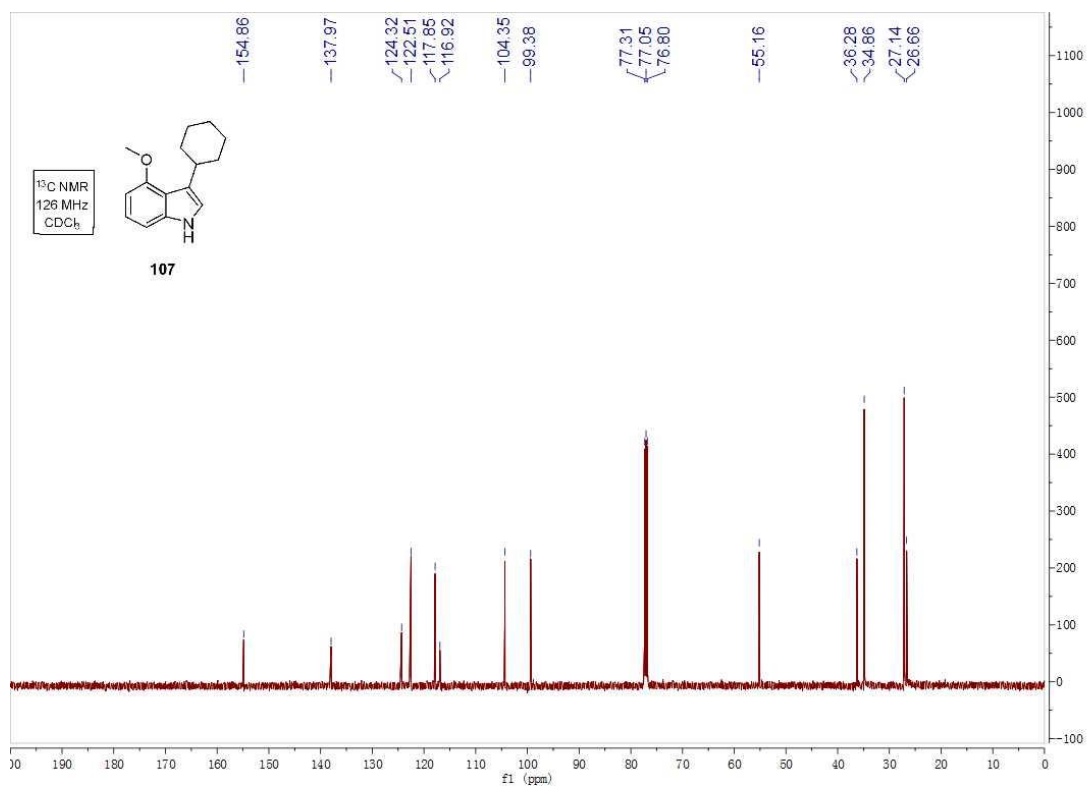

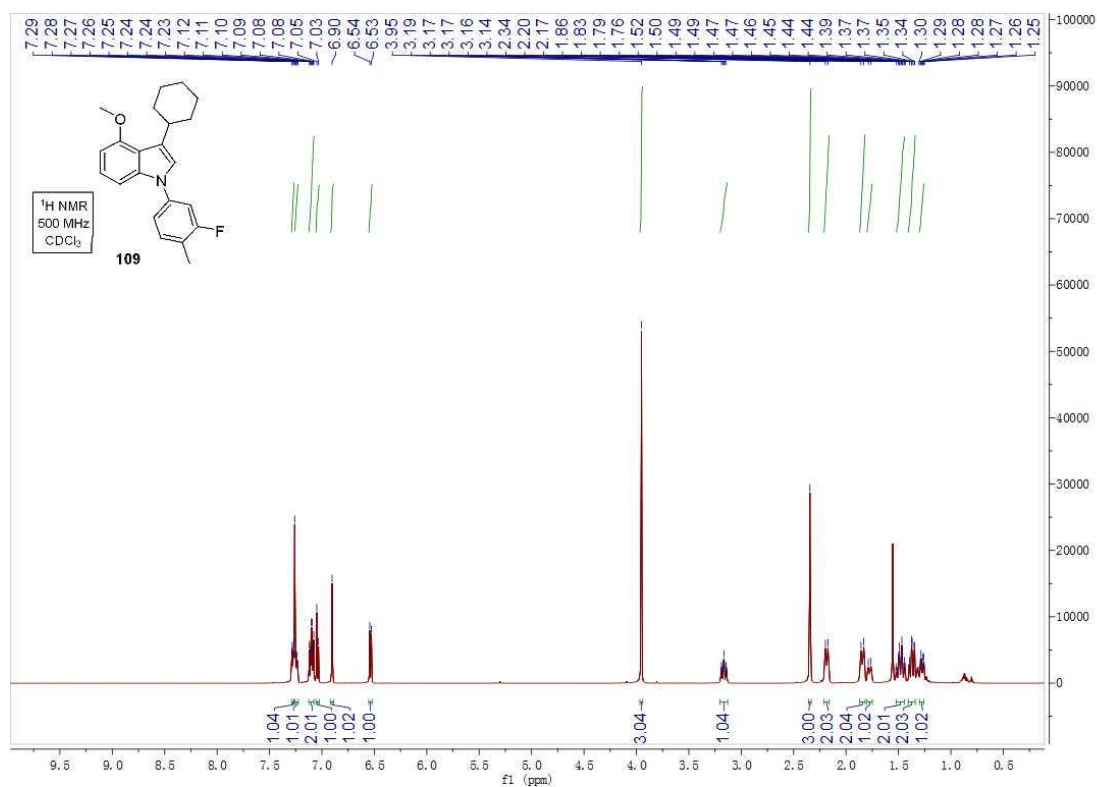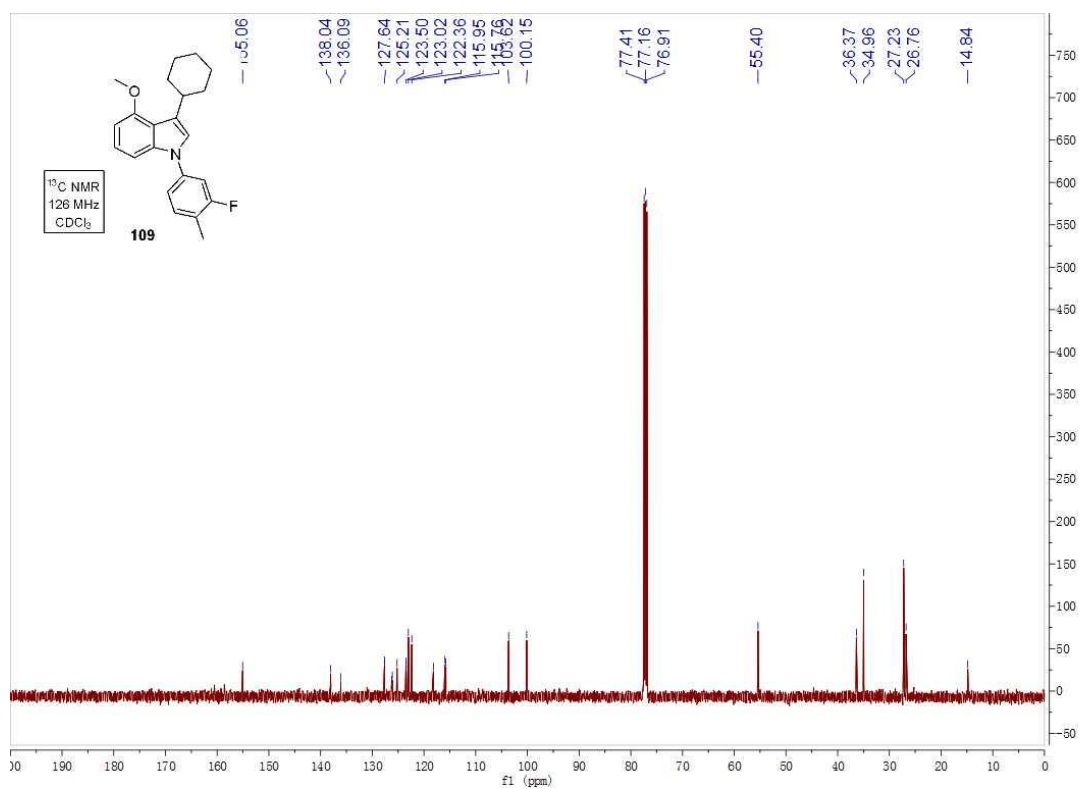

## 8. References

1. Ignacio, M.-M. et al. Ascorbic acid as an aryl radical inducer in the gold-mediated arylation of indoles with aryldiazonium chlorides. *Chem. Eur. J.* **26**, 634–642 (2020).
2. MacKenzie, I. K. et al. Discovery and characterization of an acridine radical photoreductant. *Nature* **580**, 76–80 (2020).
3. Bai, J. et al. Radical anion promoted chemoselective cleavage of Csp<sup>2</sup>–S bond enables formal cross-coupling of aryl methyl sulfones with alcohols. *Org. Lett.* **23**, 5761–5765 (2021).
4. Cristau, H.-J. et al. A general and mild Ullmann-type synthesis of diaryl ethers. *Org. Lett.* **6**, 913–916 (2004).
5. Wu, W.-B. & Huang, J.-M. Electrochemical cleavage of aryl ethers promoted by sodium borohydride. *J. Org. Chem.* **79**, 10189–10195 (2014).
6. Fischer, S., Ward, T. R. & Liang, A. D. Engineering a metathesis-catalyzing artificial metalloenzyme based on HaloTag. *ACS catal.* **11**, 6343–6347 (2021).
7. Bering, L., Jeyakumar, K. & Antonchick, A. P. Metal-free C–O bond functionalization: catalytic intramolecular and intermolecular benzylation of arenes. *Org. Lett.* **20**, 3911–3914 (2018).
8. Paia, G. & Chattopadhyay, A. P. *N*-arylation of nitrogen containing heterocycles with aryl halides using copper nanoparticle catalytic system. *Tetrahedron Lett.* **57**, 3140–3145 (2016).
9. Frisch, M. et al. Gaussian 09, Revision E.01 (Gaussian, Inc., Wallingford CT) (2013).
10. Zhao, Y. & Trunhlar, D. The M06 suite of density functionals for main group thermochemistry, thermochemical kinetics, noncovalent interactions, excited states, and transition elements: two new functionals and systematic testing of four M06-class functionals and 12 other functionals. *Theor. Chem. Account.* **120**, 215–241 (2008).
11. Weigend, F. & Ahlrichs, R. Balanced basis sets of split valence, triple zeta valence and quadruple zeta valence quality for H to Rn: design and assessment of accuracy. *Phys. Chem. Chem. Phys.* **7**, 3297–3305 (2005).
12. Marenich, A. V., Cramer, C. J. & Truhlar, D. G. Universal solvation model based on solute electron density and on a continuum model of the solvent defined by the bulk dielectric constant and atomic surface tensions. *J. Phys. Chem. B.* **113**, 6378–6396 (2009).
13. Grimme, S. et al. A consistent and accurate *ab initio* parametrization of density functional dispersioncorrection (DFT-D) for the 94 elements H–Pu. *J. Chem. Phys.* **132**, 154104 (2010).

14. Lu, T. & Chen, F. Multiwfn: a multifunctional wavefunction analyzer. *J. Comput. Chem.* **33**, 580–592 (2012).
